# Supplementary material for: Dynamic multi-species occupancy models reveal individualistic habitat preferences in a high-altitude grassland bird community
Source: PeerJ. 2019 Feb 15;7:e6276. doi: 10.7717/peerj.6276 (PMC6378914; doi:10.7717/peerj.6276)
Supplement: Supplemental Information 1 [file peerj-07-6276-s003.xlsx]

## Sheet: Birds_veg_plot data seasons all
Date	Month	Season	Surv-Type	Survey	Plot	Where	Farm	Weather	Wind	1st Oservibility	2nd Obserbility	Species	Time (min)	Status	Breeding	Category	Start time	Day	grid (min)	Animals	Total	desired	unimportant	negative indicators
2010-03-10	March	Autumn 2010	birds	1	P01	Eskom	Chatworth	partly cloudy, cool	strong	90	80	Cisticola Wing-snapping	1	least concern	no sign	grassland	11:03:00	mid-day	0.25	absent	1	0	1	0
2010-03-10	March	Autumn 2010	birds	1	P01	Eskom	Chatworth	partly cloudy, cool	strong	90	80	Cisticola Zitting	1	least concern	no sign	grassland	11:03:00	mid-day	0.25	absent	1	0	1	0
2010-03-10	March	Autumn 2010	birds	1	P01	Eskom	Chatworth	partly cloudy, cool	strong	90	80	Crow Cape	1	least concern	no sign	grassland	11:03:00	mid-day	0.25	absent	1	0	1	0
2010-03-10	March	Autumn 2010	birds	1	P01	Eskom	Chatworth	partly cloudy, cool	strong	90	80	Falcon Amur	2	rare	no sign	grassland raptor	11:03:00	mid-day	0.25	absent	1	1	0	0
2010-03-10	March	Autumn 2010	birds	1	P01	Eskom	Chatworth	partly cloudy, cool	strong	90	80	Martin Banded	2	least concern	no sign	aerial feeder	11:03:00	mid-day	0.25	absent	1	0	1	0
2010-03-10	March	Autumn 2010	birds	1	P01	Eskom	Chatworth	partly cloudy, cool	strong	90	80	Widowbird Long-tailed	3	rare	no sign	grassland	11:03:00	mid-day	0.25	absent	1	0	1	0
2010-04-08	April	Autumn 2010	birds	2	P01	Eskom	Chatworth	partly cloudy, cool	strong	90	80	Cisticola Wing-snapping	1	least concern	no sign	grassland	09:46:00	late morning	0.25	absent	1	0	1	0
2010-04-08	April	Autumn 2010	birds	2	P01	Eskom	Chatworth	partly cloudy, cool	strong	90	80	Longclaw Cape	1	uncommon	no sign	grassland	09:46:00	late morning	0.25	absent	1	0	1	0
2010-04-08	April	Autumn 2010	birds	2	P01	Eskom	Chatworth	partly cloudy, cool	strong	90	80	Longclaw Cape	3	uncommon	no sign	grassland	09:46:00	late morning	0.25	absent	1	0	1	0
2010-04-08	April	Autumn 2010	birds	2	P01	Eskom	Chatworth	partly cloudy, cool	strong	90	80	Martin Banded	3	least concern	no sign	aerial feeder	09:46:00	late morning	0.25	absent	1	0	1	0
2010-04-08	April	Autumn 2010	birds	2	P01	Eskom	Chatworth	partly cloudy, cool	strong	90	80	Quailfinch African	19	rare	no sign	grassland	09:46:00	late morning	0.25	absent	1	0	1	0
2010-04-08	April	Autumn 2010	birds	2	P01	Eskom	Chatworth	partly cloudy, cool	strong	90	80	Swallow Greater-striped	5	least concern	no sign	aerial feeder	09:46:00	late morning	0.25	absent	1	0	1	0
2010-04-08	April	Autumn 2010	birds	2	P01	Eskom	Chatworth	partly cloudy, cool	strong	90	80	swift African Black	5	least concern	no sign	aerial feeder	09:46:00	late morning	0.25	absent	1	0	1	0
2010-04-08	April	Autumn 2010	birds	2	P01	Eskom	Chatworth	partly cloudy, cool	strong	90	80	Swift Alpine	3	least concern	no sign	aerial feeder	09:46:00	late morning	0.25	absent	1	0	1	0
2010-04-08	April	Autumn 2010	birds	2	P01	Eskom	Chatworth	partly cloudy, cool	strong	90	80	Swift white-rumped	20	least concern	no sign	aerial feeder	09:46:00	late morning	0.25	absent	1	0	1	0
2011-03-04	March	Autumn 2010-11	vegetation	3	P01	Eskom	Chatworth					Cisticola Cloud				grassland			0.5
2011-03-04	March	Autumn 2010-11	vegetation	3	P01	Eskom	Chatworth					Cisticola Wing-snapping				grassland			0.5
2011-03-04	March	Autumn 2010-11	vegetation	3	P01	Eskom	Chatworth					Cisticola Zitting				grassland			0.5
2011-03-04	March	Autumn 2010-11	vegetation	3	P01	Eskom	Chatworth					Martin Banded				aerial feeder			0.5
2011-03-04	March	Autumn 2010-11	vegetation	3	P01	Eskom	Chatworth					Swallow Barn				aerial feeder			0.5
2011-03-04	March	Autumn 2010-11	vegetation	3	P01	Eskom	Chatworth					Widowbird Long-tailed				grassland			0.5
2011-03-01	March	Autumn 2011	birds	1	P01	Eskom	Chatworth	cloudy, cool	moderate	85	83.3	Cisticola Wing-snapping	9	least concern	no sign	grassland	09:10:00	late morning	0.5	absent	1	0	1	0
2011-03-01	March	Autumn 2011	birds	1	P01	Eskom	Chatworth	cloudy, cool	moderate	85	83.3	Cisticola Zitting	1	least concern	no sign	grassland	09:10:00	late morning	0.5	absent	1	0	1	0
2011-03-01	March	Autumn 2011	birds	1	P01	Eskom	Chatworth	cloudy, cool	moderate	85	83.3	Crow Cape	7	least concern	no sign	grassland	09:10:00	late morning	0.5	present	1	0	1	0
2011-03-01	March	Autumn 2011	birds	1	P01	Eskom	Chatworth	cloudy, cool	moderate	85	83.3	Longclaw Cape	15	uncommon	no sign	grassland	09:10:00	late morning	0.5	present	1	0	1	0
2011-03-01	March	Autumn 2011	birds	1	P01	Eskom	Chatworth	cloudy, cool	moderate	85	83.3	Longclaw Cape	16	uncommon	no sign	grassland	09:10:00	late morning	0.5	present	1	0	1	0
2011-03-01	March	Autumn 2011	birds	1	P01	Eskom	Chatworth	cloudy, cool	moderate	85	83.3	Martin Banded	15	least concern	no sign	aerial feeder	09:10:00	late morning	0.5	present	1	0	1	0
2011-03-01	March	Autumn 2011	birds	1	P01	Eskom	Chatworth	cloudy, cool	moderate	85	83.3	Pipit Yellow-breasted	17	rare	no sign	grassland	09:10:00	late morning	0.5	present	1	1	0	0
2011-03-01	March	Autumn 2011	birds	1	P01	Eskom	Chatworth	cloudy, cool	moderate	85	83.3	Swallow Barn	6	least concern	no sign	aerial feeder	09:10:00	late morning	0.5	absent	1	0	1	0
2010-10-11	October	Spring 2010	birds	1	P01	Eskom	Chatworth	clear , cool	strong	100	86.7	Crow Cape	2	least concern	no sign	grassland	10:30:00	late morning	0.5	absent	1	0	0	1
2010-10-11	October	Spring 2010	birds	1	P01	Eskom	Chatworth	clear , cool	strong	100	86.7	Lark Red-capped	1	rare	no sign	grassland	10:30:00	late morning	0.5	absent	1	1	0	0
2010-10-11	October	Spring 2010	birds	1	P01	Eskom	Chatworth	clear , cool	strong	100	86.7	Pipit Yellow-breasted	30	rare	no sign	grassland	10:30:00	late morning	0.5	absent	1	0	1	0
2010-10-12	October	Spring 2010	birds	1	P01	Eskom	Chatworth	partly cloudy, cold	strong	65	63.3	Lark Red-capped	11	rare	no sign	grassland	10:30:00	late morning	0.5	absent	1	0	0	1
2010-10-22	October	Spring 2010	birds	2	P01	Eskom	Chatworth	clear , cool	strong	100	86.7	Cisticola Wing-snapping	20	least concern	no sign	grassland	09:40:00	late morning	0.5	absent	1	0	0	1
2010-10-22	October	Spring 2010	birds	2	P01	Eskom	Chatworth	clear , cool	strong	100	86.7	Lark Red-capped	2	common	no sign	grassland	09:40:00	late morning	0.5	absent	1	0	1	0
2010-10-22	October	Spring 2010	birds	2	P01	Eskom	Chatworth	clear , cool	strong	100	86.7	Lark Red-capped	3	common	no sign	grassland	09:40:00	late morning	0.5	absent	1	0	1	0
2010-10-22	October	Spring 2010	birds	2	P01	Eskom	Chatworth	clear , cool	strong	100	86.7	Lark Red-capped	2	common	no sign	grassland	09:40:00	late morning	0.5	absent	1	0	1	0
2010-10-22	October	Spring 2010	birds	2	P01	Eskom	Chatworth	clear , cool	strong	100	86.7	Lark Red-capped	20	common	no sign	grassland	09:40:00	late morning	0.5	absent	1	0	0	1
2010-10-22	October	Spring 2010	birds	2	P01	Eskom	Chatworth	partly cloudy, cold	strong	65	63.3	Pipit African	2	uncommon	no sign	grassland	09:40:00	late morning	0.5	present	1	0	1	0
2010-10-22	October	Spring 2010	birds	2	P01	Eskom	Chatworth	partly cloudy, cold	strong	65	63.3	Pipit African	24	uncommon	no sign	grassland	09:40:00	late morning	0.5	present	1	0	1	0
2010-10-22	October	Spring 2010	birds	2	P01	Eskom	Chatworth	clear, hot	calm	80	86.7	Quailfinch African	3	uncommon	no sign	grassland	09:40:00	late morning	0.5	absent	1	0	1	0
2010-10-22	October	Spring 2010	birds	2	P01	Eskom	Chatworth	clear, hot	calm	80	86.7	Quailfinch African	24	uncommon	no sign	grassland	09:40:00	late morning	0.5	absent	1	0	1	0
2010-10-22	October	Spring 2010	birds	2	P01	Eskom	Chatworth	clear, hot	calm	80	86.7	Quailfinch African	27	uncommon	no sign	grassland	09:40:00	late morning	0.5	absent	1	0	1	0
2010-10-22	October	Spring 2010	birds	2	P01	Eskom	Chatworth	clear, hot	calm	80	86.7	Starling Pied	6	least concern	no sign	grassland	09:40:00	late morning	0.5	absent	1	0	1	0
2010-12-01	Dec	Summer 2010-11	birds	1	P01	Eskom	Chatworth	clear , cool	strong	100	86.7	Canary Cape	23	least concern	no sign	scrub & forests	08:40:00	mid-morning	0.5	absent	1	0	1	0
2010-12-01	Dec	Summer 2010-11	birds	1	P01	Eskom	Chatworth	clear , cool	strong	100	86.7	Cisticola Levaillant's	9	least concern	no sign	grassland	08:40:00	mid-morning	0.5	absent	1	0	1	0
2010-12-01	Dec	Summer 2010-11	birds	1	P01	Eskom	Chatworth	clear , cool	strong	100	86.7	Cisticola Wing-snapping	1	least concern	no sign	grassland	08:40:00	mid-morning	0.5	absent	1	0	1	0
2010-12-01	Dec	Summer 2010-11	birds	1	P01	Eskom	Chatworth	clear , cool	strong	100	86.7	Cisticola Zitting	1	least concern	no sign	grassland	08:40:00	mid-morning	0.5	absent	1	0	1	0
2010-12-01	Dec	Summer 2010-11	birds	1	P01	Eskom	Chatworth	clear , cool	strong	100	86.7	Longclaw Cape	20	least concern	no sign	grassland	08:40:00	mid-morning	0.5	absent	1	0	1	0
2010-12-01	Dec	Summer 2010-11	birds	1	P01	Eskom	Chatworth	clear , cool	strong	100	86.7	Martin Banded	8	least concern	no sign	aerial feeder	08:40:00	mid-morning	0.5	absent	1	0	1	0
2010-12-01	Dec	Summer 2010-11	birds	1	P01	Eskom	Chatworth	clear , cool	strong	100	86.7	Pipit African	20	uncommon	no sign	grassland	08:40:00	mid-morning	0.5	absent	1	0	1	0
2010-12-01	Dec	Summer 2010-11	birds	1	P01	Eskom	Chatworth	clear , cool	strong	100	86.7	Pipit African	22	uncommon	no sign	grassland	08:40:00	mid-morning	0.5	absent	1	0	1	0
2010-12-01	Dec	Summer 2010-11	birds	1	P01	Eskom	Chatworth	clear , cool	strong	100	86.7	Quail Common	2	common	no sign	grassland	08:40:00	mid-morning	0.5	absent	1	0	1	0
2010-12-01	Dec	Summer 2010-11	birds	1	P01	Eskom	Chatworth	clear , cool	strong	100	86.7	Quail Common	4	common	no sign	grassland	08:40:00	mid-morning	0.5	present	1	0	1	0
2010-12-01	Dec	Summer 2010-11	birds	1	P01	Eskom	Chatworth	clear , cool	strong	100	86.7	Quail Common	5	common	no sign	grassland	08:40:00	mid-morning	0.5	present	1	0	1	0
2010-12-01	Dec	Summer 2010-11	birds	1	P01	Eskom	Chatworth	clear , cool	strong	100	86.7	Quail Common	11	common	no sign	grassland	08:40:00	mid-morning	0.5	present	1	0	1	0
2010-12-01	Dec	Summer 2010-11	birds	1	P01	Eskom	Chatworth	clear , cool	strong	100	86.7	Quailfinch African	3	abundant	no sign	grassland	08:40:00	mid-morning	0.5	present	1	0	1	0
2010-12-01	Dec	Summer 2010-11	birds	1	P01	Eskom	Chatworth	clear , cool	strong	100	86.7	Quailfinch African	5	abundant	no sign	grassland	08:40:00	mid-morning	0.5	present	1	0	0	1
2010-12-01	Dec	Summer 2010-11	birds	1	P01	Eskom	Chatworth	clear , cool	strong	100	86.7	Quailfinch African	7	abundant	no sign	grassland	08:40:00	mid-morning	0.5	present	1	0	1	0
2010-12-01	Dec	Summer 2010-11	birds	1	P01	Eskom	Chatworth	clear , cool	strong	100	86.7	Quailfinch African	10	abundant	no sign	grassland	08:40:00	mid-morning	0.5	present	1	0	1	0
2010-12-01	Dec	Summer 2010-11	birds	1	P01	Eskom	Chatworth	clear , cool	strong	100	86.7	Quailfinch African	11	abundant	no sign	grassland	08:40:00	mid-morning	0.5	present	1	0	1	0
2010-12-01	Dec	Summer 2010-11	birds	1	P01	Eskom	Chatworth	clear , cool	strong	100	86.7	Quailfinch African	12	abundant	no sign	grassland	08:40:00	mid-morning	0.5	present	1	0	1	0
2010-12-01	Dec	Summer 2010-11	birds	1	P01	Eskom	Chatworth	clear , cool	strong	100	86.7	Quailfinch African	23	abundant	no sign	grassland	08:40:00	mid-morning	0.5	present	1	0	1	0
2010-12-01	Dec	Summer 2010-11	birds	1	P01	Eskom	Chatworth	clear , cool	strong	100	86.7	Swallow Barn	21	least concern	no sign	aerial feeder	08:40:00	mid-morning	0.5	present	1	0	1	0
2010-12-01	Dec	Summer 2010-11	birds	1	P01	Eskom	Chatworth	clear , cool	strong	100	86.7	Widowbird Long-tailed	23	uncommon	no sign	grassland	08:40:00	mid-morning	0.5	present	1	1	0	0
2010-12-01	Dec	Summer 2010-11	birds	1	P01	Eskom	Chatworth	clear , cool	strong	100	86.7	Widowbird Long-tailed	23	uncommon	no sign	grassland	08:40:00	mid-morning	0.5	present	1	0	0	1
2010-12-01	Dec	Summer 2010-11	birds	1	P01	Eskom	Chatworth	clear , cool	strong	100	86.7	Widowbird Long-tailed	23	uncommon	no sign	grassland	08:40:00	mid-morning	0.5	present	1	0	1	0
2010-12-07	Dec	Summer 2010-11	vegetation	3	P01	Eskom	Chatworth					Cisticola Cloud				grassland			0.5
2010-12-07	Dec	Summer 2010-11	vegetation	3	P01	Eskom	Chatworth					Cisticola Zitting				grassland			0.5
2010-12-07	Dec	Summer 2010-11	vegetation	3	P01	Eskom	Chatworth					Duck White-faced				waterbird			0.5
2010-12-07	Dec	Summer 2010-11	vegetation	3	P01	Eskom	Chatworth					Duck Yellow-billed				waterbird			0.5
2010-12-07	Dec	Summer 2010-11	vegetation	3	P01	Eskom	Chatworth					Francolin Red-winged				grassland			0.5
2010-12-07	Dec	Summer 2010-11	vegetation	3	P01	Eskom	Chatworth					Martin Banded				aerial feeder			0.5
2010-12-07	Dec	Summer 2010-11	vegetation	3	P01	Eskom	Chatworth					Swallow Barn				aerial feeder			0.5
2010-12-07	Dec	Summer 2010-11	vegetation	3	P01	Eskom	Chatworth					Swallow Greater-striped				aerial feeder			0.5
2010-12-07	Dec	Summer 2010-11	vegetation	3	P01	Eskom	Chatworth					Whydah Pin-tailed				grassland			0.5
2010-12-07	Dec	Summer 2010-11	vegetation	3	P01	Eskom	Chatworth					Widowbird Fan-tailed				grassland			0.5
2010-12-07	Dec	Summer 2010-11	vegetation	3	P01	Eskom	Chatworth					Widowbird Long-tailed				grassland			0.5
2010-12-14	Dec	Summer 2010-11	birds	2	P01	Eskom	Chatworth	partly cloudy, cool	moderate	90	86.7	Canary Cape	3	least concern	no sign	scrub & forests	09:15:00	late morning	0.5	absent	1	0	1	0
2010-12-14	Dec	Summer 2010-11	birds	2	P01	Eskom	Chatworth	partly cloudy, cool	moderate	90	86.7	Chat Ant-eating	20	least concern	no sign	grassland	09:15:00	late morning	0.5	absent	1	0	1	0
2010-12-14	Dec	Summer 2010-11	birds	2	P01	Eskom	Chatworth	partly cloudy, cool	moderate	90	86.7	Cisticola Wing-snapping	16	least concern	no sign	grassland	09:15:00	late morning	0.5	absent	1	0	1	0
2010-12-14	Dec	Summer 2010-11	birds	2	P01	Eskom	Chatworth	partly cloudy, cool	moderate	90	86.7	Cisticola Zitting	5	least concern	no sign	grassland	09:15:00	late morning	0.5	absent	1	0	1	0
2010-12-14	Dec	Summer 2010-11	birds	2	P01	Eskom	Chatworth	partly cloudy, cool	moderate	90	86.7	Crane Grey Crowned	6	least concern	no sign	wetland	09:15:00	late morning	0.5	absent	1	0	1	0
2010-12-14	Dec	Summer 2010-11	birds	2	P01	Eskom	Chatworth	partly cloudy, cool	moderate	90	86.7	Crow Pied	2	least concern	no sign	scavenger	09:15:00	late morning	0.5	absent	1	1	0	0
2010-12-14	Dec	Summer 2010-11	birds	2	P01	Eskom	Chatworth	partly cloudy, cool	moderate	90	86.7	Longclaw Cape	4	uncommon	no sign	grassland	09:15:00	late morning	0.5	absent	1	0	1	0
2010-12-14	Dec	Summer 2010-11	birds	2	P01	Eskom	Chatworth	partly cloudy, cool	moderate	90	86.7	Longclaw Cape	17	uncommon	no sign	grassland	09:15:00	late morning	0.5	absent	1	0	1	0
2010-12-14	Dec	Summer 2010-11	birds	2	P01	Eskom	Chatworth	partly cloudy, cool	moderate	90	86.7	Martin Banded	30	least concern	no sign	aerial feeder	09:15:00	late morning	0.5	absent	1	0	1	0
2010-12-14	Dec	Summer 2010-11	birds	2	P01	Eskom	Chatworth	partly cloudy, cool	moderate	90	86.7	Pipit African	3	common	no sign	grassland	09:15:00	late morning	0.5	absent	1	0	1	0
2010-12-14	Dec	Summer 2010-11	birds	2	P01	Eskom	Chatworth	partly cloudy, cool	moderate	90	86.7	Pipit Yellow-breasted	15	common	no sign	grassland	09:15:00	late morning	0.5	absent	1	0	1	0
2010-12-14	Dec	Summer 2010-11	birds	2	P01	Eskom	Chatworth	partly cloudy, cool	moderate	90	86.7	Pipit Yellow-breasted	16	common	no sign	grassland	09:15:00	late morning	0.5	absent	1	0	1	0
2010-12-14	Dec	Summer 2010-11	birds	2	P01	Eskom	Chatworth	partly cloudy, cool	moderate	90	86.7	Pipit Yellow-breasted	20	common	no sign	grassland	09:15:00	late morning	0.5	absent	1	0	1	0
2010-12-14	Dec	Summer 2010-11	birds	2	P01	Eskom	Chatworth	partly cloudy, cool	moderate	90	86.7	Quail Common	1	uncommon	no sign	grassland	09:15:00	late morning	0.5	absent	1	0	1	0
2010-12-14	Dec	Summer 2010-11	birds	2	P01	Eskom	Chatworth	partly cloudy, cool	moderate	90	86.7	Quail Common	19	uncommon	no sign	grassland	09:15:00	late morning	0.5	absent	1	0	1	0
2010-12-14	Dec	Summer 2010-11	birds	2	P01	Eskom	Chatworth	clear , cool	moderate	100	93.3	Quailfinch African	7	abundant	no sign	grassland	09:15:00	late morning	0.5	absent	1	0	1	0
2010-12-14	Dec	Summer 2010-11	birds	2	P01	Eskom	Chatworth	clear , cool	moderate	100	93.3	Quailfinch African	8	abundant	no sign	grassland	09:15:00	late morning	0.5	absent	1	0	1	0
2010-12-14	Dec	Summer 2010-11	birds	2	P01	Eskom	Chatworth	clear , cool	moderate	100	93.3	Quailfinch African	18	abundant	no sign	grassland	09:15:00	late morning	0.5	absent	1	0	1	0
2010-12-14	Dec	Summer 2010-11	birds	2	P01	Eskom	Chatworth	clear , cool	moderate	100	93.3	Quailfinch African	19	abundant	no sign	grassland	09:15:00	late morning	0.5	absent	1	0	1	0
2010-12-14	Dec	Summer 2010-11	birds	2	P01	Eskom	Chatworth	partly cloudy, cool	moderate	90	86.7	Quailfinch African	3	abundant	no sign	grassland	09:15:00	late morning	0.5	absent	1	0	1	0
2010-12-14	Dec	Summer 2010-11	birds	2	P01	Eskom	Chatworth	partly cloudy, cool	moderate	90	86.7	Quailfinch African	4	abundant	no sign	grassland	09:15:00	late morning	0.5	absent	1	0	1	0
2010-12-14	Dec	Summer 2010-11	birds	2	P01	Eskom	Chatworth	partly cloudy, cool	moderate	90	86.7	Quailfinch African	5	abundant	no sign	grassland	09:15:00	late morning	0.5	absent	1	0	1	0
2010-12-14	Dec	Summer 2010-11	birds	2	P01	Eskom	Chatworth	partly cloudy, cool	moderate	90	86.7	Quailfinch African	6	abundant	no sign	grassland	09:15:00	late morning	0.5	absent	1	0	1	0
2010-12-14	Dec	Summer 2010-11	birds	2	P01	Eskom	Chatworth	clear , cool	moderate	100	93.3	Swallow Barn	2	least concern	no sign	aerial feeder	09:15:00	late morning	0.5	absent	1	0	1	0
2010-12-14	Dec	Summer 2010-11	birds	2	P01	Eskom	Chatworth	clear , cool	moderate	100	93.3	Swallow Greater-striped	16	least concern	no sign	aerial feeder	09:15:00	late morning	0.5	absent	1	0	1	0
2010-12-14	Dec	Summer 2010-11	birds	2	P01	Eskom	Chatworth	clear , cool	moderate	100	93.3	Widowbird Fan-tailed	17	least concern	no sign	grassland	09:15:00	late morning	0.5	absent	1	0	1	0
2010-12-14	Dec	Summer 2010-11	birds	2	P01	Eskom	Chatworth	clear , cool	moderate	100	93.3	Widowbird Long-tailed	3	uncommon	no sign	grassland	09:15:00	late morning	0.5	absent	1	0	1	0
2010-12-14	Dec	Summer 2010-11	birds	2	P01	Eskom	Chatworth	clear , cool	moderate	100	93.3	Widowbird Long-tailed	17	uncommon	no sign	grassland	09:15:00	late morning	0.5	absent	1	0	1	0
2011-11-17	Nov	Summer 2011-12	birds	1	P01	Eskom	Chatworth	partly cloudy, hot	calm	70	80	Buzzard Steppe	1	least concern	none breeder	raptor	09:00:00	late morning	0.5	absent	1
2011-11-17	Nov	Summer 2011-12	birds	1	P01	Eskom	Chatworth	partly cloudy, hot	calm	70	80	Cisticola Wing-snapping	3	least concern	no sign	grassland	09:00:00	late morning	0.5	absent	1
2011-11-17	Nov	Summer 2011-12	birds	1	P01	Eskom	Chatworth	partly cloudy, hot	calm	70	80	Crane Grey Crowned	2	least concern	no sign	wetland	09:00:00	late morning	0.5	absent	1
2011-11-17	Nov	Summer 2011-12	birds	1	P01	Eskom	Chatworth	partly cloudy, hot	calm	70	80	Lark Red-capped	3	uncommon	no sign	grassland	09:00:00	late morning	0.5	absent	1
2011-11-17	Nov	Summer 2011-12	birds	1	P01	Eskom	Chatworth	partly cloudy, hot	calm	70	80	Lark Red-capped	4	uncommon	no sign	grassland	09:00:00	late morning	0.5	absent	1
2011-11-17	Nov	Summer 2011-12	birds	1	P01	Eskom	Chatworth	partly cloudy, hot	calm	70	80	Lark Red-capped	10	uncommon	no sign	grassland	09:00:00	late morning	0.5	absent	1
2011-11-17	Nov	Summer 2011-12	birds	1	P01	Eskom	Chatworth	partly cloudy, hot	calm	70	80	Longclaw Cape	1	uncommon	no sign	grassland	09:00:00	late morning	0.5	absent	1
2011-11-17	Nov	Summer 2011-12	birds	1	P01	Eskom	Chatworth	partly cloudy, hot	calm	70	80	Longclaw Cape	16	uncommon	no sign	grassland	09:00:00	late morning	0.5	absent	1
2011-11-17	Nov	Summer 2011-12	birds	1	P01	Eskom	Chatworth	partly cloudy, hot	calm	70	80	Martin Banded	20	least concern	no sign	aerial feeder	09:00:00	late morning	0.5	absent	1
2011-11-17	Nov	Summer 2011-12	birds	1	P01	Eskom	Chatworth	partly cloudy, hot	calm	70	80	Pipit African	2	uncommon	no sign	grassland	09:00:00	late morning	0.5	absent	1
2011-11-17	Nov	Summer 2011-12	birds	1	P01	Eskom	Chatworth	partly cloudy, hot	calm	70	80	Pipit African	4	uncommon	no sign	grassland	09:00:00	late morning	0.5	absent	1
2011-11-17	Nov	Summer 2011-12	birds	1	P01	Eskom	Chatworth	partly cloudy, hot	calm	70	80	Pipit African	10	uncommon	no sign	grassland	09:00:00	late morning	0.5	absent	1
2011-11-17	Nov	Summer 2011-12	vegetation	3	P01	Eskom	Chatworth	clear, hot	strong	80	73.3	Buzzard Steppe				raptor			0.5
2011-11-17	Nov	Summer 2011-12	vegetation	3	P01	Eskom	Chatworth	clear, hot	strong	80	73.3	Cisticola Cloud				grassland			0.5
2011-11-17	Nov	Summer 2011-12	vegetation	3	P01	Eskom	Chatworth	clear, hot	strong	80	73.3	Cisticola Wing-snapping				grassland			0.5
2011-11-17	Nov	Summer 2011-12	vegetation	3	P01	Eskom	Chatworth	clear, hot	strong	80	73.3	Cisticola Zitting				grassland			0.5
2011-11-17	Nov	Summer 2011-12	vegetation	3	P01	Eskom	Chatworth	clear, hot	strong	80	73.3	Crane Grey Crowned				wetland			0.5
2011-11-17	Nov	Summer 2011-12	vegetation	3	P01	Eskom	Chatworth	clear, hot	strong	80	73.3	Crow Pied				scavenger			0.5
2011-11-17	Nov	Summer 2011-12	vegetation	3	P01	Eskom	Chatworth	clear, hot	strong	80	73.3	Lark Red-capped				grassland			0.5
2011-11-17	Nov	Summer 2011-12	vegetation	3	P01	Eskom	Chatworth	clear, hot	strong	80	73.3	Martin Banded				aerial feeder			0.5
2011-11-17	Nov	Summer 2011-12	vegetation	3	P01	Eskom	Chatworth	clear, hot	strong	80	73.3	Pipit African				grassland			0.5
2011-11-17	Nov	Summer 2011-12	vegetation	3	P01	Eskom	Chatworth	clear, hot	strong	80	73.3	Starling Pied				grassland			0.5
2011-11-18	Nov	Summer 2011-12	birds	2	P01	Eskom	Chatworth	cloudy, cool	moderate	85	83.3	Cisticola Wing-snapping	9	least concern	not seen	grassland	10:30:00	late morning	0.5	absent	1
2011-11-18	Nov	Summer 2011-12	birds	2	P01	Eskom	Chatworth	cloudy, cool	moderate	85	83.3	Kestrel Rock	3	least concern	non breeder	raptor	10:30:00	late morning	0.5	absent	1
2011-11-18	Nov	Summer 2011-12	birds	2	P01	Eskom	Chatworth	cloudy, cool	moderate	85	83.3	Lark Red-capped	1	common	breeding	grassland	10:30:00	late morning	0.5	absent	1
2011-11-18	Nov	Summer 2011-12	birds	2	P01	Eskom	Chatworth	cloudy, cool	moderate	85	83.3	Lark Red-capped	5	common	breeding	grassland	10:30:00	late morning	0.5	absent	1
2011-11-18	Nov	Summer 2011-12	birds	2	P01	Eskom	Chatworth	cloudy, cool	moderate	85	83.3	Lark Red-capped	8	common	breeding	grassland	10:30:00	late morning	0.5	absent	1
2011-11-18	Nov	Summer 2011-12	birds	2	P01	Eskom	Chatworth	cloudy, cool	moderate	85	83.3	Lark Red-capped	17	common	breeding	grassland	10:30:00	late morning	0.5	absent	1
2011-11-18	Nov	Summer 2011-12	birds	2	P01	Eskom	Chatworth	cloudy, cool	moderate	85	83.3	Martin Banded	1	least concern	none br	aerial feeder	10:30:00	late morning	0.5	absent	1
2011-11-18	Nov	Summer 2011-12	birds	2	P01	Eskom	Chatworth	cloudy, cool	moderate	85	83.3	Pipit African	5	rare	no sign	grassland	10:30:00	late morning	0.5	absent	1
2011-11-18	Nov	Summer 2011-12	birds	2	P01	Eskom	Chatworth	cloudy, cool	moderate	85	83.3	Starling Pied	1	least concern	breeding	grassland	10:30:00	late morning	0.5	absent	1
2011-11-18	Nov	Summer 2011-12	birds	2	P01	Eskom	Chatworth	cloudy, cool	moderate	85	83.3	Swallow Barn	3	least concern	none breeder	aerial feeder	10:30:00	late morning	0.5	absent	1
2011-12-12	Dec	Summer 2011-12	birds	1	P01	Eskom	Chatworth	clear , cool	strong	100	86.7	Cisticola Wing-snapping	3	least concern	no sign	grassland	10:50:00	late morning	0.5	present	1
2011-12-12	Dec	Summer 2011-12	birds	1	P01	Eskom	Chatworth	clear , cool	strong	100	86.7	Longclaw Cape	1	uncommon	no sign	grassland	10:50:00	late morning	0.5	absent	1
2011-12-12	Dec	Summer 2011-12	birds	1	P01	Eskom	Chatworth	clear , cool	strong	100	86.7	Longclaw Cape	2	uncommon	no sign	grassland	10:50:00	late morning	0.5	absent	1
2011-12-12	Dec	Summer 2011-12	birds	1	P01	Eskom	Chatworth	clear , cool	strong	100	86.7	Quail Common	12	rare	no sign	grassland	10:50:00	late morning	0.5	present	1
2011-12-12	Dec	Summer 2011-12	birds	1	P01	Eskom	Chatworth	clear , cool	strong	100	86.7	Quailfinch African	8	rare	no sign	grassland	10:50:00	late morning	0.5	present	1
2011-12-12	Dec	Summer 2011-12	birds	1	P01	Eskom	Chatworth	clear , cool	strong	100	86.7	Swallow Barn	5	least concern	no sign	aerial feeder	10:50:00	late morning	0.5	present	1
2011-12-12	Dec	Summer 2011-12	birds	1	P01	Eskom	Chatworth	clear , cool	strong	100	86.7	Swift Alpine	9	least concern	none breeder	aerial feeder	10:50:00	late morning	0.5	present	1
2011-12-12	Dec	Summer 2011-12	birds	1	P01	Eskom	Chatworth	clear , cool	strong	100	86.7	Swift Black	9	least concern	none breeder	aerial feeder	10:50:00	late morning	0.5	present	1
2011-12-12	Dec	Summer 2011-12	vegetation	3	P01	Eskom	Chatworth	clear, hot	strong	80	73.3	Cisticola Zitting				grassland			0.5
2011-12-12	Dec	Summer 2011-12	vegetation	3	P01	Eskom	Chatworth	clear, hot	strong	80	73.3	Cisticola Zitting				grassland			0.5
2011-12-12	Dec	Summer 2011-12	vegetation	3	P01	Eskom	Chatworth	clear, hot	strong	80	73.3	Crow Pied				scavenger			0.5
2011-12-12	Dec	Summer 2011-12	vegetation	3	P01	Eskom	Chatworth	clear, hot	strong	80	73.3	Longclaw Cape				grassland			0.5
2011-12-12	Dec	Summer 2011-12	vegetation	3	P01	Eskom	Chatworth	clear, hot	strong	80	73.3	Longclaw Cape				grassland			0.5
2011-12-12	Dec	Summer 2011-12	vegetation	3	P01	Eskom	Chatworth	clear, hot	strong	80	73.3	Pipit African				grassland			0.5
2011-12-12	Dec	Summer 2011-12	vegetation	3	P01	Eskom	Chatworth	clear, hot	strong	80	73.3	Pipit Yellow-breasted				grassland			0.5
2011-12-12	Dec	Summer 2011-12	vegetation	3	P01	Eskom	Chatworth	clear, hot	strong	80	73.3	Quail Common				grassland			0.5
2011-12-12	Dec	Summer 2011-12	vegetation	3	P01	Eskom	Chatworth	clear, hot	strong	80	73.3	Quailfinch African				grassland			0.5
2011-12-12	Dec	Summer 2011-12	vegetation	3	P01	Eskom	Chatworth	clear, hot	strong	80	73.3	Vulture Cape				raptor			0.5
2011-12-12	Dec	Summer 2011-12	vegetation	3	P01	Eskom	Chatworth	clear, hot	strong	80	73.3	Widowbird Long-tailed				grassland			0.5
2011-12-14	Dec	Summer 2011-12	birds	2	P01	Eskom	Chatworth	cloudy, cold	moderate	60	66.7	Cisticola Wing-snapping	3	least concern	no sign	grassland	08:00:00	mid-morning	0.5	present	1
2011-12-14	Dec	Summer 2011-12	birds	2	P01	Eskom	Chatworth	cloudy, cold	moderate	60	66.7	Cisticola Zitting	21	least concern	no sign	grassland	09:50:00	late morning	0.5	present	1
2011-12-14	Dec	Summer 2011-12	birds	2	P01	Eskom	Chatworth	cloudy, cold	moderate	60	66.7	Longclaw Cape	1	rare	no sign	grassland	09:50:00	late morning	0.5	absent
2011-12-14	Dec	Summer 2011-12	birds	2	P01	Eskom	Chatworth	cloudy, cold	moderate	60	66.7	Martin Banded	1	least concern	no sign	aerial feeder	09:50:00	late morning	0.5	absent
2011-12-14	Dec	Summer 2011-12	birds	2	P01	Eskom	Chatworth	cloudy, cold	moderate	60	66.7	Pipit Yellow-breasted	1	rare	no sign	grassland	09:50:00	late morning	0.5	present	1
2011-12-14	Dec	Summer 2011-12	birds	2	P01	Eskom	Chatworth	cloudy, cold	moderate	60	66.7	Quail Common	7	uncommon	no sign	grassland	09:50:00	late morning	0.5	present	1
2011-12-14	Dec	Summer 2011-12	birds	2	P01	Eskom	Chatworth	cloudy, cold	moderate	60	66.7	Quail Common	10	uncommon	no sign	grassland	09:50:00	late morning	0.5	present	1
2011-12-14	Dec	Summer 2011-12	birds	2	P01	Eskom	Chatworth	cloudy, cold	moderate	60	66.7	Quail Common	4	uncommon	no sign	grassland	09:50:00	late morning	0.5	present	1
2011-12-14	Dec	Summer 2011-12	birds	2	P01	Eskom	Chatworth	cloudy, cold	moderate	60	66.7	Quailfinch African	5	rare	no sign	grassland	09:50:00	late morning	0.5	present	1
2011-12-14	Dec	Summer 2011-12	birds	2	P01	Eskom	Chatworth	cloudy, cold	moderate	60	66.7	Swift Black	8	least concern	none breeder	aerial feeder	09:50:00	late morning	0.5	absent	1
2012-01-06	Jan	Summer 2011-12	birds	1	P01	Eskom	Chatworth	clear , cool	calm	100	100	Cisticola Wing-snapping	1	least concern	no sign	grassland	09:00:00	late morning	0.5	present	1
2012-01-06	Jan	Summer 2011-12	birds	1	P01	Eskom	Chatworth	clear , cool	calm	100	100	Cisticola Zitting	4	least concern	no sign	grassland	09:00:00	late morning	0.5	present	1
2012-01-06	Jan	Summer 2011-12	birds	1	P01	Eskom	Chatworth	clear , cool	calm	100	100	Crow Pied	1	least concern	no sign	scavenger	09:00:00	late morning	0.5	present	1
2012-01-06	Jan	Summer 2011-12	birds	1	P01	Eskom	Chatworth	clear , cool	calm	100	100	Longclaw Cape	3	common	no sign	grassland	09:00:00	late morning	0.5	present	1
2012-01-06	Jan	Summer 2011-12	birds	1	P01	Eskom	Chatworth	clear , cool	calm	100	100	Longclaw Cape	16	common	no sign	grassland	09:00:00	late morning	0.5	present	1
2012-01-06	Jan	Summer 2011-12	birds	1	P01	Eskom	Chatworth	clear , cool	calm	100	100	Longclaw Cape	21	common	no sign	grassland	09:00:00	late morning	0.5	present	1
2012-01-06	Jan	Summer 2011-12	birds	1	P01	Eskom	Chatworth	clear , cool	calm	100	100	Longclaw Cape	22	common	no sign	grassland	09:00:00	late morning	0.5	present	1
2012-01-06	Jan	Summer 2011-12	birds	1	P01	Eskom	Chatworth	clear , cool	calm	100	100	Martin Banded	2	least concern	no sign	aerial feeder	09:00:00	late morning	0.5	present	1
2012-01-06	Jan	Summer 2011-12	birds	1	P01	Eskom	Chatworth	clear , cool	calm	100	100	Quail Common	25	rare	no sign	grassland	09:00:00	late morning	0.5	present	1
2012-01-06	Jan	Summer 2011-12	birds	1	P01	Eskom	Chatworth	clear , cool	calm	100	100	Quailfinch African	9	uncommon	no sign	grassland	09:00:00	late morning	0.5	present	1
2012-01-06	Jan	Summer 2011-12	birds	1	P01	Eskom	Chatworth	clear , cool	calm	100	100	Quailfinch African	21	uncommon	no sign	grassland	09:00:00	late morning	0.5	present	1
2012-01-06	Jan	Summer 2011-12	birds	1	P01	Eskom	Chatworth	clear , cool	calm	100	100	Raven white-necked	26	least concern	no sign	grassland	09:00:00	late morning	0.5	present	1
2012-01-06	Jan	Summer 2011-12	birds	1	P01	Eskom	Chatworth	clear , cool	calm	100	100	Swallow Barn	19	least concern	no sign	aerial feeder	09:00:00	late morning	0.5	present	1
2012-01-06	Jan	Summer 2011-12	birds	1	P01	Eskom	Chatworth	clear , cool	calm	100	100	Swallow Greater-striped	13	least concern	no sign	aerial feeder	09:00:00	late morning	0.5	present	1
2012-01-06	Jan	Summer 2011-12	vegetation	3	P01	Eskom	Chatworth	clear, hot	calm	80	86.7	Chat Ant-eating				grassland			0.5
2012-01-06	Jan	Summer 2011-12	vegetation	3	P01	Eskom	Chatworth	clear, hot	calm	80	86.7	Cisticola Cloud				grassland			0.5
2012-01-06	Jan	Summer 2011-12	vegetation	3	P01	Eskom	Chatworth	clear, hot	calm	80	86.7	Cisticola Levaillant's				grassland			0.5
2012-01-06	Jan	Summer 2011-12	vegetation	3	P01	Eskom	Chatworth	clear, hot	calm	80	86.7	Cisticola Pale-crowned				grassland			0.5
2012-01-06	Jan	Summer 2011-12	vegetation	3	P01	Eskom	Chatworth	clear, hot	calm	80	86.7	Cisticola Wing-snapping				grassland			0.5
2012-01-06	Jan	Summer 2011-12	vegetation	3	P01	Eskom	Chatworth	clear, hot	calm	80	86.7	Cisticola Wing-snapping				grassland			0.5
2012-01-06	Jan	Summer 2011-12	vegetation	3	P01	Eskom	Chatworth	clear, hot	calm	80	86.7	Cisticola Zitting				grassland			0.5
2012-01-06	Jan	Summer 2011-12	vegetation	3	P01	Eskom	Chatworth	clear, hot	calm	80	86.7	Crow Cape				grassland			0.5
2012-01-06	Jan	Summer 2011-12	vegetation	3	P01	Eskom	Chatworth	clear, hot	calm	80	86.7	Longclaw Cape				grassland			0.5
2012-01-06	Jan	Summer 2011-12	vegetation	3	P01	Eskom	Chatworth	clear, hot	calm	80	86.7	Longclaw Cape				grassland			0.5
2012-01-06	Jan	Summer 2011-12	vegetation	3	P01	Eskom	Chatworth	clear, hot	calm	80	86.7	Martin Banded				aerial feeder			0.5
2012-01-06	Jan	Summer 2011-12	vegetation	3	P01	Eskom	Chatworth	clear, hot	calm	80	86.7	Pipit Yellow-breasted				grassland			0.5
2012-01-06	Jan	Summer 2011-12	vegetation	3	P01	Eskom	Chatworth	clear, hot	calm	80	86.7	Quailfinch African				grassland			0.5
2012-01-06	Jan	Summer 2011-12	vegetation	3	P01	Eskom	Chatworth	clear, hot	calm	80	86.7	Quailfinch African				grassland			0.5
2012-01-06	Jan	Summer 2011-12	vegetation	3	P01	Eskom	Chatworth	clear, hot	calm	80	86.7	Swallow Barn				aerial feeder			0.5
2012-01-06	Jan	Summer 2011-12	vegetation	3	P01	Eskom	Chatworth	clear, hot	calm	80	86.7	Swallow Greater-striped				aerial feeder			0.5
2012-01-06	Jan	Summer 2011-12	vegetation	3	P01	Eskom	Chatworth	clear, hot	calm	80	86.7	Widowbird Long-tailed				grassland			0.5
2012-01-06	Jan	Summer 2011-12	vegetation	3	P01	Eskom	Chatworth	clear, hot	calm	80	86.7	Widowbird Long-tailed				grassland			0.5
2012-01-10	Jan	Summer 2011-12	birds	2	P01	Eskom	Chatworth	clear , hot	calm	80	86.7	Cisticola Wing-snapping	1	least concern	no sign	grassland	08:15:00	mid-morning	0.5	present	1
2012-01-10	Jan	Summer 2011-12	birds	2	P01	Eskom	Chatworth	clear , hot	calm	80	86.7	Cisticola Zitting	5	least concern	no sign	grassland	08:15:00	mid-morning	0.5	present	1
2012-01-10	Jan	Summer 2011-12	birds	2	P01	Eskom	Chatworth	clear , hot	calm	80	86.7	Crow Cape	15	least concern	none breeder	grassland	08:15:00	mid-morning	0.5	present	1
2012-01-10	Jan	Summer 2011-12	birds	2	P01	Eskom	Chatworth	clear , hot	calm	80	86.7	Falcon Amur	17	rare	none breeder	grassland raptor	08:15:00	mid-morning	0.5	present	1
2012-01-10	Jan	Summer 2011-12	birds	2	P01	Eskom	Chatworth	clear , hot	calm	80	86.7	Ibis Southern Bald	1	least concern	none breeder	grassland	08:15:00	mid-morning	0.5	present	1
2012-01-10	Jan	Summer 2011-12	birds	2	P01	Eskom	Chatworth	clear , hot	calm	80	86.7	Longclaw Cape	4	rare	no sign	grassland	08:15:00	mid-morning	0.5	absent	1
2012-01-10	Jan	Summer 2011-12	birds	2	P01	Eskom	Chatworth	clear , hot	calm	80	86.7	Martin Banded	1	least concern	no sign	aerial feeder	08:15:00	mid-morning	0.5	present	1
2012-01-10	Jan	Summer 2011-12	birds	2	P01	Eskom	Chatworth	clear , hot	calm	80	86.7	Pipit African	19	common	no sign	grassland	08:15:00	mid-morning	0.5	absent	1
2012-01-10	Jan	Summer 2011-12	birds	2	P01	Eskom	Chatworth	clear , hot	calm	80	86.7	Quailfinch African	15	common	no sign	grassland	08:15:00	mid-morning	0.5	present	1
2012-01-10	Jan	Summer 2011-12	birds	2	P01	Eskom	Chatworth	clear , hot	calm	80	86.7	Quailfinch African	17	common	no sign	grassland	08:15:00	mid-morning	0.5	present	1
2012-01-10	Jan	Summer 2011-12	birds	2	P01	Eskom	Chatworth	clear , hot	calm	80	86.7	Quailfinch African	21	common	no sign	grassland	08:15:00	mid-morning	0.5	present	1
2012-01-10	Jan	Summer 2011-12	birds	2	P01	Eskom	Chatworth	clear , hot	calm	80	86.7	Starling Pied	2	least concern	no sign	grassland	08:15:00	mid-morning	0.5	present	1
2012-01-10	Jan	Summer 2011-12	birds	2	P01	Eskom	Chatworth	clear , hot	calm	80	86.7	Swallow Barn	19	least concern	none breeder	aerial feeder	08:15:00	mid-morning	0.5	present	1
2012-02-07	Feb	Summer 2011-12	birds	1	P01	Eskom	Chatworth	clear , cool	moderate	100	93.3	Cisticola Zitting	1	least concern	no sign	grassland	09:50:00	late morning	0.5	present	1
2012-02-07	Feb	Summer 2011-12	birds	1	P01	Eskom	Chatworth	clear , cool	moderate	100	93.3	Crow Cape	2	least concern	none breeder	grassland	09:50:00	late morning	0.5	present	1
2012-02-07	Feb	Summer 2011-12	birds	1	P01	Eskom	Chatworth	clear , cool	moderate	100	93.3	Falcon Amur	16	uncommon	none breeder	grassland raptor	09:50:00	late morning	0.5	present	1
2012-02-07	Feb	Summer 2011-12	birds	1	P01	Eskom	Chatworth	clear , cool	moderate	100	93.3	Falcon Amur	17	uncommon	none breeder	grassland raptor	09:50:00	late morning	0.5	present	1
2012-02-07	Feb	Summer 2011-12	birds	1	P01	Eskom	Chatworth	clear , cool	moderate	100	93.3	Martin Banded	1	least concern	no sign	aerial feeder	09:50:00	late morning	0.5	present	1
2012-02-07	Feb	Summer 2011-12	birds	1	P01	Eskom	Chatworth	clear , cool	moderate	100	93.3	Pipit African	22	rare	no sign	grassland	09:50:00	late morning	0.5	present	1
2012-02-07	Feb	Summer 2011-12	birds	1	P01	Eskom	Chatworth	clear , cool	moderate	100	93.3	Quailfinch African	1	rare	no sign	grassland	09:50:00	late morning	0.5	present	1
2012-02-07	Feb	Summer 2011-12	birds	1	P01	Eskom	Chatworth	clear , cool	moderate	100	93.3	Starling Pied	5	least concern	no sign	grassland	09:50:00	late morning	0.5	present	1
2012-02-07	Feb	Summer 2011-12	birds	1	P01	Eskom	Chatworth	clear , cool	moderate	100	93.3	Swallow Barn	2	least concern	none breeder	aerial feeder	09:50:00	late morning	0.5	present	1
2012-02-07	Feb	Summer 2011-12	vegetation	3	P01	Eskom	Chatworth	clear, hot	calm	80	86.7	Cisticola Zitting				grassland			0.5
2012-02-07	Feb	Summer 2011-12	vegetation	3	P01	Eskom	Chatworth	clear, hot	calm	80	86.7	Falcon Amur				grassland raptor			0.5
2012-02-07	Feb	Summer 2011-12	vegetation	3	P01	Eskom	Chatworth	clear, hot	calm	80	86.7	Falcon Amur				grassland raptor			0.5
2012-02-07	Feb	Summer 2011-12	vegetation	3	P01	Eskom	Chatworth	clear, hot	calm	80	86.7	Ibis Hadeda				marsh & wetlands			0.5
2012-02-07	Feb	Summer 2011-12	vegetation	3	P01	Eskom	Chatworth	clear, hot	calm	80	86.7	Martin Banded				aerial feeder			0.5
2012-02-07	Feb	Summer 2011-12	vegetation	3	P01	Eskom	Chatworth	clear, hot	calm	80	86.7	Starling Pied				grassland			0.5
2012-02-07	Feb	Summer 2011-12	vegetation	3	P01	Eskom	Chatworth	clear, hot	calm	80	86.7	Stork White				grassland			0.5
2012-02-07	Feb	Summer 2011-12	vegetation	3	P01	Eskom	Chatworth	clear, hot	calm	80	86.7	Swallow Barn				aerial feeder			0.5
2012-02-07	Feb	Summer 2011-12	vegetation	3	P01	Eskom	Chatworth	clear, hot	calm	80	86.7	Swallow Greater-striped				aerial feeder			0.5
2012-02-07	Feb	Summer 2011-12	vegetation	3	P01	Eskom	Chatworth	clear, hot	calm	80	86.7	Swallow-cliff South African				aerial feeder			0.5
2012-02-07	Feb	Summer 2011-12	vegetation	3	P01	Eskom	Chatworth	clear, hot	calm	80	86.7	Widowbird Long-tailed				grassland			0.5
2012-02-09	Feb	Summer 2011-12	birds	2	P01	Eskom	Chatworth	cloudy, warm	calm	70	80	Cisticola Wing-snapping	1	least concern	no sign	grassland	10:15:00	late morning	0.5	present	1
2012-02-09	Feb	Summer 2011-12	birds	2	P01	Eskom	Chatworth	cloudy, warm	calm	70	80	Longclaw Cape	1	uncommon	no sign	grassland	10:15:00	late morning	0.5	present	1
2012-02-09	Feb	Summer 2011-12	birds	2	P01	Eskom	Chatworth	cloudy, warm	calm	70	80	Longclaw Cape	8	uncommon	no sign	grassland	10:15:00	late morning	0.5	present	1
2012-02-09	Feb	Summer 2011-12	birds	2	P01	Eskom	Chatworth	cloudy, warm	calm	70	80	Martin Banded	1	least concern	no sign	aerial feeder	10:15:00	late morning	0.5	present	1
2012-02-09	Feb	Summer 2011-12	birds	2	P01	Eskom	Chatworth	cloudy, warm	calm	70	80	Pipit African	1	rare	no sign	grassland	10:15:00	late morning	0.5	present	1
2012-02-09	Feb	Summer 2011-12	birds	2	P01	Eskom	Chatworth	cloudy, warm	calm	70	80	Stork White	9	least concern	none breeder	grassland	10:15:00	late morning	0.5	present	1
2012-02-09	Feb	Summer 2011-12	birds	2	P01	Eskom	Chatworth	cloudy, warm	calm	70	80	Swallow Greater-striped	19	least concern	none breeder	aerial feeder	10:15:00	late morning	0.5	present	1
2012-02-09	Feb	Summer 2011-12	birds	2	P01	Eskom	Chatworth	cloudy, warm	calm	70	80	Wagtail Cape	19	least concern	no sign	raptor	10:15:00	late morning	0.5	present	1
2010-06-14	June	Winter 2010	birds	1	P01	Eskom	Chatworth	clear , cool	strong	100	86.7	Cisticola Wing-snapping	30	least concern	no sign	grassland	11:10:00	mid-day	0.5	absent	1	0	1	0
2010-06-14	June	Winter 2010	birds	1	P01	Eskom	Chatworth	clear , cool	strong	100	86.7	Longclaw Cape	15	uncommon	no sign	grassland	11:10:00	mid-day	0.5	absent	1	0	1	0
2010-06-14	June	Winter 2010	birds	1	P01	Eskom	Chatworth	clear , cool	strong	100	86.7	Longclaw Cape	29	uncommon	no sign	grassland	11:10:00	mid-day	0.5	absent	1	0	1	0
2010-06-14	June	Winter 2010	birds	1	P01	Eskom	Chatworth	clear , cool	strong	100	86.7	Longclaw Cape	30	uncommon	no sign	grassland	11:10:00	mid-day	0.5	absent	1	0	1	0
2010-06-14	June	Winter 2010	birds	1	P01	Eskom	Chatworth	clear , cool	strong	100	86.7	Pipit African	10	rare	no sign	grassland	11:10:00	mid-day	0.5	absent	1	0	1	0
2010-06-14	June	Winter 2010	birds	1	P01	Eskom	Chatworth	clear , cool	strong	100	86.7	Pipit Plain-backed	35	least concern	no sign	grassland	11:10:00	mid-day	0.5	absent	1	0	1	0
2010-06-14	June	Winter 2010	birds	1	P01	Eskom	Chatworth	clear , cool	strong	100	86.7	Widowbird Long-tailed	35	rare	no sign	grassland	11:10:00	mid-day	0.5	absent	1	0	1	0
2010-06-15	June	Winter 2010	birds	1	P01	Eskom	Chatworth	clear , cool	strong	100	86.7	Lark Red-capped	1	rare	no sign	grassland	11:10:00	mid-day	0.5	absent	1	0	1	0
2010-07-02	July	Winter 2010	birds	2	P01	Eskom	Chatworth	clear, cold	strong	75	70	Cisticola Wing-snapping	5	least concern	no sign	grassland	10:45:00	late morning	0.5	present	1	0	1	0
2010-07-02	July	Winter 2010	birds	2	P01	Eskom	Chatworth	clear, cold	strong	75	70	Lark Red-capped	1	rare	no sign	grassland	10:45:00	late morning	0.5	present	1	0	1	0
2011-11-18	Nov	Summer 2011-12	birds	1	P03	Eskom	Chatworth	cloudy, cool	strong	85	76.7	Bustard Denham's	1	least concern	no sign	grassland	08:00:00	mid-morning	0.5	absent	1
2011-11-18	Nov	Summer 2011-12	birds	1	P03	Eskom	Chatworth	cloudy, cool	strong	85	76.7	Crane Blue	4	least concern	no sign	grassland	08:00:00	mid-morning	0.5	absent	1
2011-11-18	Nov	Summer 2011-12	birds	1	P03	Eskom	Chatworth	cloudy, cool	strong	85	76.7	Lark Red-capped	1	uncommon	no sign	grassland	08:00:00	mid-morning	0.5	absent	1
2011-11-18	Nov	Summer 2011-12	birds	1	P03	Eskom	Chatworth	cloudy, cool	strong	85	76.7	Lark Red-capped	3	uncommon	no sign	grassland	08:00:00	mid-morning	0.5	absent	1
2011-11-18	Nov	Summer 2011-12	birds	1	P03	Eskom	Chatworth	cloudy, cool	strong	85	76.7	Longclaw Cape	5	least concern	no sign	grassland	08:00:00	mid-morning	0.5	absent	1
2011-11-18	Nov	Summer 2011-12	birds	1	P03	Eskom	Chatworth	cloudy, cool	strong	85	76.7	Martin Banded	2	least concern	no sign	aerial feeder	08:00:00	mid-morning	0.5	absent	1
2011-11-18	Nov	Summer 2011-12	birds	1	P03	Eskom	Chatworth	cloudy, cool	strong	85	76.7	Quail Common	4	uncommon	no sign	grassland	08:00:00	mid-morning	0.5	absent	1
2011-11-18	Nov	Summer 2011-12	birds	1	P03	Eskom	Chatworth	cloudy, cool	strong	85	76.7	Quail Common	7	uncommon	no sign	grassland	08:00:00	mid-morning	0.5	absent	1
2011-11-18	Nov	Summer 2011-12	birds	1	P03	Eskom	Chatworth	cloudy, cool	strong	85	76.7	Swift Alpine	17	least concern	no sign	aerial feeder	08:00:00	mid-morning	0.5	absent	1
2011-11-18	Nov	Summer 2011-12	birds	1	P03	Eskom	Chatworth	cloudy, cool	strong	85	76.7	Widowbird Long-tailed	20	rare	no sign	grassland	08:00:00	mid-morning	0.5	absent	1
2011-11-21	Nov	Summer 2011-12	birds	2	P03	Eskom	Chatworth	partly cloudy, cool	strong	90	80	Chat Ant-eating	7	least concern	no sign	grassland	10:00:00	late morning	0.5	absent	1
2011-11-21	Nov	Summer 2011-12	birds	2	P03	Eskom	Chatworth	partly cloudy, cool	strong	90	80	Cisticola Cloud	22	least concern	no sign	grassland	10:00:00	late morning	0.5	absent	1
2011-11-21	Nov	Summer 2011-12	birds	2	P03	Eskom	Chatworth	partly cloudy, cool	strong	90	80	Cisticola Wing-snapping	5	least concern	no sign	grassland	10:00:00	late morning	0.5	absent	1
2011-11-21	Nov	Summer 2011-12	birds	2	P03	Eskom	Chatworth	partly cloudy, cool	strong	90	80	Lark Red-capped	18	common	no sign	grassland	10:00:00	late morning	0.5	absent	1
2011-11-21	Nov	Summer 2011-12	birds	2	P03	Eskom	Chatworth	partly cloudy, cool	strong	90	80	Martin Banded	3	least concern	no sign	aerial feeder	10:00:00	late morning	0.5	absent	1
2011-11-21	Nov	Summer 2011-12	birds	2	P03	Eskom	Chatworth	partly cloudy, cool	strong	90	80	Pipit Yellow-breasted	21	common	no sign	grassland	10:00:00	late morning	0.5	absent	1
2011-11-21	Nov	Summer 2011-12	birds	2	P03	Eskom	Chatworth	partly cloudy, cool	strong	90	80	Quail Common	24	common	no sign	grassland	10:00:00	late morning	0.5	absent	1
2011-11-21	Nov	Summer 2011-12	birds	2	P03	Eskom	Chatworth	partly cloudy, cool	strong	90	80	Widowbird Long-tailed	5	common	no sign	grassland	10:00:00	late morning	0.5	absent	1
2011-11-21	Nov	Summer 2011-12	vegetation	3	P03	Eskom	Chatworth	partly cloudy, cool	strong	90	80	Cisticola Wing-snapping
2011-11-21	Nov	Summer 2011-12	vegetation	3	P03	Eskom	Chatworth	partly cloudy, cool	strong	90	80	Cisticola Zitting
2011-11-21	Nov	Summer 2011-12	vegetation	3	P03	Eskom	Chatworth	partly cloudy, cool	strong	90	80	Martin Banded
2011-11-21	Nov	Summer 2011-12	vegetation	3	P03	Eskom	Chatworth	partly cloudy, cool	strong	90	80	Pipit African
2011-11-21	Nov	Summer 2011-12	vegetation	3	P03	Eskom	Chatworth	partly cloudy, cool	strong	90	80	Pipit Yellow-breasted
2011-11-21	Nov	Summer 2011-12	vegetation	3	P03	Eskom	Chatworth	partly cloudy, cool	strong	90	80	Widowbird Long-tailed
2011-12-12	Dec	Summer 2011-12	birds	1	P03	Eskom	Chatworth	clear, cool	moderate	100	93.3	Cisticola Wing-snapping	5		no sign	grassland
2011-12-12	Dec	Summer 2011-12	birds	1	P03	Eskom	Chatworth	clear, cool	moderate	100	93.3	Cisticola Wing-snapping	5		no sign	grassland
2011-12-12	Dec	Summer 2011-12	birds	1	P03	Eskom	Chatworth	clear, cool	moderate	100	93.3	Cisticola Zitting	1		no sign	grassland
2011-12-12	Dec	Summer 2011-12	birds	1	P03	Eskom	Chatworth	clear, cool	moderate	100	93.3	Ibis Hadeda	1		no sign	marsh & wetlands
2011-12-12	Dec	Summer 2011-12	birds	1	P03	Eskom	Chatworth	clear, cool	moderate	100	93.3	Longclaw Cape	2	rare	no sign	grassland
2011-12-12	Dec	Summer 2011-12	birds	1	P03	Eskom	Chatworth	clear, cool	moderate	100	93.3	Longclaw Cape	3	rare	no sign	grassland
2011-12-12	Dec	Summer 2011-12	birds	1	P03	Eskom	Chatworth	clear, cool	moderate	100	93.3	Quail Common	4		no sign	grassland
2011-12-12	Dec	Summer 2011-12	birds	1	P03	Eskom	Chatworth	clear, cool	moderate	100	93.3	Widowbird Long-tailed	6		no sign	grassland
2011-12-12	Dec	Summer 2011-12	vegetation	3	P03	Eskom	Chatworth	clear, hot	strong	80	73.3	Chat Ant-eating			no sign	grassland
2011-12-12	Dec	Summer 2011-12	vegetation	3	P03	Eskom	Chatworth	clear, hot	strong	80	73.3	Cisticola Wing-snapping			no sign	grassland
2011-12-12	Dec	Summer 2011-12	vegetation	3	P03	Eskom	Chatworth	clear, hot	strong	80	73.3	Korhaan White-bellied			no sign	grassland			0.5
2011-12-12	Dec	Summer 2011-12	vegetation	3	P03	Eskom	Chatworth	clear, hot	strong	80	73.3	Longclaw Cape			no sign	grassland
2011-12-12	Dec	Summer 2011-12	vegetation	3	P03	Eskom	Chatworth	clear, hot	strong	80	73.3	Quail Common			no sign	grassland
2011-12-12	Dec	Summer 2011-12	vegetation	3	P03	Eskom	Chatworth	clear, hot	strong	80	73.3	Widowbird Long-tailed			no sign	grassland
2011-12-14	Dec	Summer 2011-12	birds	2	P03	Eskom	Chatworth	cloudy, cold	moderate	60	66.7	Cisticola Wing-snapping	3	least concern	no sign	grassland	08:00:00	late morning	0.5	present	1
2011-12-14	Dec	Summer 2011-12	birds	2	P03	Eskom	Chatworth	cloudy, cold	moderate	60	66.7	Cisticola Zitting	1	least concern	no sign	grassland	08:00:00	mid-morning	0.5	present	1
2011-12-14	Dec	Summer 2011-12	birds	2	P03	Eskom	Chatworth	cloudy, cold	moderate	60	66.7	Ibis Hadeda	9	least concern	none breeder	marsh & wetlands	08:00:00	mid-morning	0.5	present	1
2011-12-14	Dec	Summer 2011-12	birds	2	P03	Eskom	Chatworth	cloudy, cold	moderate	60	66.7	Longclaw Cape	7	rare	no sign	grassland	08:00:00	mid-morning	0.5	absent
2011-12-14	Dec	Summer 2011-12	birds	2	P03	Eskom	Chatworth	cloudy, cold	moderate	60	66.7	Martin Banded	9	least concern	no sign	aerial feeder	08:00:00	mid-morning	0.5	absent
2011-12-14	Dec	Summer 2011-12	birds	2	P03	Eskom	Chatworth	cloudy, cold	moderate	60	66.7	Quail Common	1	rare	no sign	grassland	08:00:00	mid-morning	0.5	present	1
2011-12-14	Dec	Summer 2011-12	birds	2	P03	Eskom	Chatworth	cloudy, cold	moderate	60	66.7	Vulture Cape	9	least concern	none breeder	raptor	08:00:00	mid-morning	0.5	absent	1
2011-12-14	Dec	Summer 2011-12	birds	2	P03	Eskom	Chatworth	cloudy, cold	moderate	60	66.7	Widowbird Long-tailed	2	rare	no sign	grassland	08:00:00	mid-morning	0.5	absent	1
2012-01-06	Jan	Summer 2011-12	vegetation	3	P03	Eskom	Chatworth	clear, hot	calm	80	86.7	Chat Ant-eating
2012-01-06	Jan	Summer 2011-12	vegetation	3	P03	Eskom	Chatworth	clear, hot	calm	80	86.7	Cisticola Cloud
2012-01-06	Jan	Summer 2011-12	vegetation	3	P03	Eskom	Chatworth	clear, hot	calm	80	86.7	Cisticola Levallaint's
2012-01-06	Jan	Summer 2011-12	vegetation	3	P03	Eskom	Chatworth	clear, hot	calm	80	86.7	Cisticola Pale-crowned
2012-01-06	Jan	Summer 2011-12	vegetation	3	P03	Eskom	Chatworth	clear, hot	calm	80	86.7	Cisticola Wing-snapping
2012-01-06	Jan	Summer 2011-12	vegetation	3	P03	Eskom	Chatworth	clear, hot	calm	80	86.7	Longclaw Cape
2012-01-06	Jan	Summer 2011-12	vegetation	3	P03	Eskom	Chatworth	clear, hot	calm	80	86.7	Quailfinch African
2012-01-06	Jan	Summer 2011-12	vegetation	3	P03	Eskom	Chatworth	clear, hot	calm	80	86.7	Swallow Greater-striped
2012-01-06	Jan	Summer 2011-12	vegetation	3	P03	Eskom	Chatworth	clear, hot	calm	80	86.7	Widowbird Long-tailed
2012-01-10	Jan	Summer 2011-12	birds	1	P03	Eskom	Chatworth	clear , cool	moderate	100	93.3	Chat Ant-eating	3	least concern	no sign	grassland	09:30:00	late morning	0.5	present	1
2012-01-10	Jan	Summer 2011-12	birds	1	P03	Eskom	Chatworth	clear , cool	moderate	100	93.3	Cisticola Cloud	15	least concern	no sign	grassland	09:30:00	late morning	0.5	present	1
2012-01-10	Jan	Summer 2011-12	birds	1	P03	Eskom	Chatworth	clear , cool	moderate	100	93.3	Cisticola Wing-snapping	3	least concern	no sign	grassland	09:30:00	late morning	0.5	present	1
2012-01-10	Jan	Summer 2011-12	birds	1	P03	Eskom	Chatworth	clear , cool	moderate	100	93.3	Ibis Southern Bald	16	least concern	no sign	grassland	09:30:00	late morning	0.5	present	1
2012-01-10	Jan	Summer 2011-12	birds	1	P03	Eskom	Chatworth	clear , cool	moderate	100	93.3	Korhaan White-bellied	16	least concern	no sign	grassland	09:30:00	late morning	0.5	absent	1
2012-01-10	Jan	Summer 2011-12	birds	1	P03	Eskom	Chatworth	clear , cool	moderate	100	93.3	Lark Red-capped	2	uncommon	no sign	grassland	09:30:00	late morning	0.5	absent	1
2012-01-10	Jan	Summer 2011-12	birds	1	P03	Eskom	Chatworth	clear , cool	moderate	100	93.3	Lark Red-capped	5	uncommon	no sign	grassland	09:30:00	late morning	0.5	absent	1
2012-01-10	Jan	Summer 2011-12	birds	1	P03	Eskom	Chatworth	clear , cool	moderate	100	93.3	Longclaw Cape	21	common	no sign	grassland	09:30:00	late morning	0.5	absent	1
2012-01-10	Jan	Summer 2011-12	birds	1	P03	Eskom	Chatworth	clear , cool	moderate	100	93.3	Longclaw Cape	23	common	no sign	grassland	09:30:00	late morning	0.5	absent	1
2012-01-10	Jan	Summer 2011-12	birds	1	P03	Eskom	Chatworth	clear , cool	moderate	100	93.3	Martin Banded	9	least concern	no sign	aerial feeder	09:30:00	late morning	0.5	present	1
2012-01-10	Jan	Summer 2011-12	birds	1	P03	Eskom	Chatworth	clear , cool	moderate	100	93.3	Pipit African	1	abundant	no sign	grassland	09:30:00	late morning	0.5	present	1
2012-01-10	Jan	Summer 2011-12	birds	1	P03	Eskom	Chatworth	clear , cool	moderate	100	93.3	Pipit African	2	abundant	no sign	grassland	09:30:00	late morning	0.5	present	1
2012-01-10	Jan	Summer 2011-12	birds	1	P03	Eskom	Chatworth	clear , cool	moderate	100	93.3	Pipit African	3	abundant	no sign	grassland	09:30:00	late morning	0.5	present	1
2012-01-10	Jan	Summer 2011-12	birds	1	P03	Eskom	Chatworth	clear , cool	moderate	100	93.3	Pipit African	5	abundant	no sign	grassland	09:30:00	late morning	0.5	present	1
2012-01-10	Jan	Summer 2011-12	birds	1	P03	Eskom	Chatworth	clear , cool	moderate	100	93.3	Pipit African	16	abundant	no sign	grassland	09:30:00	late morning	0.5	absent	1
2012-01-10	Jan	Summer 2011-12	birds	1	P03	Eskom	Chatworth	clear , cool	moderate	100	93.3	Pipit African	22	abundant	no sign	grassland	09:30:00	late morning	0.5	absent	1
2012-01-10	Jan	Summer 2011-12	birds	1	P03	Eskom	Chatworth	clear , cool	moderate	100	93.3	Pipit African	25	abundant	no sign	grassland	09:30:00	late morning	0.5	absent	1
2012-01-10	Jan	Summer 2011-12	birds	1	P03	Eskom	Chatworth	clear , cool	moderate	100	93.3	Quailfinch African	3	rare	no sign	grassland	09:30:00	late morning	0.5	present	1
2012-01-10	Jan	Summer 2011-12	birds	1	P03	Eskom	Chatworth	clear , cool	moderate	100	93.3	Vulture Cape	5	least concern	none breeder	raptor	09:30:00	late morning	0.5	present	1
2012-01-10	Jan	Summer 2011-12	birds	2	P03	Eskom	Chatworth	partly cloudy, cool	moderate	90	86.7	Chat Ant-eating	22	least concern	no sign	grassland	16:30:00	late morning	0.5	present	1
2012-01-10	Jan	Summer 2011-12	birds	2	P03	Eskom	Chatworth	partly cloudy, cool	moderate	90	86.7	Cisticola Pale-crowned	1	least concern	no sign	grassland	16:30:00	late morning	0.5	present	1
2012-01-10	Jan	Summer 2011-12	birds	2	P03	Eskom	Chatworth	partly cloudy, cool	moderate	90	86.7	Cisticola Wing-snapping	1	least concern	no sign	grassland	16:30:00	late morning	0.5	present	1
2012-01-10	Jan	Summer 2011-12	birds	2	P03	Eskom	Chatworth	partly cloudy, cool	moderate	90	86.7	Cisticola Zitting	14	least concern	no sign	grassland	16:30:00	late morning	0.5	present	1
2012-01-10	Jan	Summer 2011-12	birds	2	P03	Eskom	Chatworth	partly cloudy, cool	moderate	90	86.7	Crane Grey Crowned	2	least concern	no sign	wetland	16:30:00	late morning	0.5	present	1
2012-01-10	Jan	Summer 2011-12	birds	2	P03	Eskom	Chatworth	partly cloudy, cool	moderate	90	86.7	Ibis Hadeda	10	least concern	no sign	grassland	16:30:00	late morning	0.5	absent	1
2012-01-10	Jan	Summer 2011-12	birds	2	P03	Eskom	Chatworth	partly cloudy, cool	moderate	90	86.7	Korhaan White-bellied	26	least concern	no sign	grassland	16:30:00	late morning	0.5	absent	1
2012-01-10	Jan	Summer 2011-12	birds	2	P03	Eskom	Chatworth	partly cloudy, cool	moderate	90	86.7	Longclaw Cape	4	common	no sign	grassland	16:30:00	late morning	0.5	absent	1
2012-01-10	Jan	Summer 2011-12	birds	2	P03	Eskom	Chatworth	partly cloudy, cool	moderate	90	86.7	Longclaw Cape	13	common	no sign	grassland	16:30:00	late morning	0.5	present	1
2012-01-10	Jan	Summer 2011-12	birds	2	P03	Eskom	Chatworth	partly cloudy, cool	moderate	90	86.7	Martin Banded	19	least concern	no sign	aerial feeder	16:30:00	late morning	0.5	present	1
2012-01-10	Jan	Summer 2011-12	birds	2	P03	Eskom	Chatworth	partly cloudy, cool	moderate	90	86.7	Pipit African	9	abundant	no sign	grassland	16:30:00	late morning	0.5	absent	1
2012-01-10	Jan	Summer 2011-12	birds	2	P03	Eskom	Chatworth	partly cloudy, cool	moderate	90	86.7	Pipit African	13	abundant	no sign	grassland	16:30:00	late morning	0.5	absent	1
2012-01-10	Jan	Summer 2011-12	birds	2	P03	Eskom	Chatworth	partly cloudy, cool	moderate	90	86.7	Warbler Little-rush	5	least concern	no sign	marsh & welands	16:30:00	late morning	0.5	present	1
2012-01-10	Jan	Summer 2011-12	birds	2	P03	Eskom	Chatworth	partly cloudy, cool	moderate	90	86.7	Widowbird Long-tailed	13	rare	no sign	grassland	16:30:00	late morning	0.5	present	1
2012-02-07	Feb	Summer 2011-12	birds	1	P03	Eskom	Chatworth	partly cloudy, cool	calm	90	93.3	Cisticola Pale-crowned	7	least concern	no sign	grassland	17:00:00	late-noon	0.5	present	1
2012-02-07	Feb	Summer 2011-12	birds	1	P03	Eskom	Chatworth	partly cloudy, cool	calm	90	93.3	Cisticola Wing-snapping	7	least concern	no sign	grassland	17:00:00	late-noon	0.5	present	1
2012-02-07	Feb	Summer 2011-12	birds	1	P03	Eskom	Chatworth	partly cloudy, cool	calm	90	93.3	Crane Blue	7	least concern	no sign	grassland	17:00:00	late-noon	0.5	present	1
2012-02-07	Feb	Summer 2011-12	birds	1	P03	Eskom	Chatworth	partly cloudy, cool	calm	90	93.3	Falcon Amur	1	rare	none breeder	grassland raptor	17:00:00	late-noon	0.5	present	1
2012-02-07	Feb	Summer 2011-12	birds	1	P03	Eskom	Chatworth	partly cloudy, cool	calm	90	93.3	Falcon Amur	5	rare	none breeder	grassland raptor	17:00:00	late-noon	0.5	present	1
2012-02-07	Feb	Summer 2011-12	birds	1	P03	Eskom	Chatworth	partly cloudy, cool	calm	90	93.3	Falcon Amur	9	rare	none breeder	grassland raptor	17:00:00	late-noon	0.5	present	1
2012-02-07	Feb	Summer 2011-12	birds	1	P03	Eskom	Chatworth	partly cloudy, cool	calm	90	93.3	Heron black-headed	6	least concern	none breeder	grassland	17:00:00	late-noon	0.5	present	1
2012-02-07	Feb	Summer 2011-12	birds	1	P03	Eskom	Chatworth	partly cloudy, cool	calm	90	93.3	Ibis Hadeda	1	least concern	none breeder	marsh & wetlands	17:00:00	late-noon	0.5	present	1
2012-02-07	Feb	Summer 2011-12	birds	1	P03	Eskom	Chatworth	partly cloudy, cool	calm	90	93.3	Longclaw Cape	13	rare	no sign	grassland	17:00:00	late-noon	0.5	present	1
2012-02-07	Feb	Summer 2011-12	birds	1	P03	Eskom	Chatworth	partly cloudy, cool	calm	90	93.3	Swallow Barn	1	least concern	none breeder	aerial feeder	17:00:00	late-noon	0.5	present	1
2012-02-07	Feb	Summer 2011-12	birds	1	P03	Eskom	Chatworth	partly cloudy, cool	calm	90	93.3	Widowbird Long-tailed	10	uncommon	no sign	grassland	17:00:00	late-noon	0.5	present	1
2012-02-07	Feb	Summer 2011-12	birds	1	P03	Eskom	Chatworth	partly cloudy, cool	calm	90	93.3	Widowbird Long-tailed	12	uncommon	no sign	grassland	17:00:00	late-noon	0.5	present	1
2012-02-07	Feb	Summer 2011-12	birds	1	P03	Eskom	Chatworth	partly cloudy, cool	calm	90	93.3	Widowbird Long-tailed	14	uncommon	no sign	grassland	17:00:00	late-noon	0.5	present	1
2012-02-07	Feb	Summer 2011-12	vegetation	3	P03	Eskom	Chatworth	clear, hot	calm	80	86.7	Ibis Hadeda				marsh & wetlands
2012-02-07	Feb	Summer 2011-12	vegetation	3	P03	Eskom	Chatworth	clear, hot	calm	80	86.7	Stork White				marsh & wetlands
2012-02-07	Feb	Summer 2011-12	vegetation	3	P03	Eskom	Chatworth	clear, hot	calm	80	86.7	Swallow Barn				aerial feeder
2012-02-07	Feb	Summer 2011-12	vegetation	3	P03	Eskom	Chatworth	clear, hot	calm	80	86.7	Swallow Greater-striped				aerial feeder
2012-02-07	Feb	Summer 2011-12	vegetation	3	P03	Eskom	Chatworth	clear, hot	calm	80	86.7	Swallow-cliff South African				aerial feeder
2012-02-07	Feb	Summer 2011-12	vegetation	3	P03	Eskom	Chatworth	clear, hot	calm	80	86.7	Widowbird Long-tailed				grassland
2012-02-08	Feb	Summer 2011-12	birds	2	P03	Eskom	Chatworth	clear , cool	moderate	100	93.3	Chat Ant-eating	2	least concern	no sign	grassland	09:50:00	late morning	0.5	present	1
2012-02-08	Feb	Summer 2011-12	birds	2	P03	Eskom	Chatworth	clear , cool	moderate	100	93.3	cliff-swallow South African	8	least concern	none breeder	aerial feeder	09:50:00	late morning	0.5	present	1
2012-02-08	Feb	Summer 2011-12	birds	2	P03	Eskom	Chatworth	clear , cool	moderate	100	93.3	Crane Blue	1	least concern	no sign	grassland	09:50:00	late morning	0.5	present	1
2012-02-08	Feb	Summer 2011-12	birds	2	P03	Eskom	Chatworth	clear , cool	moderate	100	93.3	Falcon Amur	4	rare	none breeder	grassland raptor	09:50:00	late morning	0.5	present	1
2012-02-08	Feb	Summer 2011-12	birds	2	P03	Eskom	Chatworth	clear , cool	moderate	100	93.3	Longclaw Cape	13	rare	no sign	grassland	09:50:00	late morning	0.5	present	1
2012-02-08	Feb	Summer 2011-12	birds	2	P03	Eskom	Chatworth	clear , cool	moderate	100	93.3	Martin Banded	7	least concern	no sign	aerial feeder	09:50:00	late morning	0.5	present	1
2012-02-08	Feb	Summer 2011-12	birds	2	P03	Eskom	Chatworth	clear , cool	moderate	100	93.3	Stork White	1	least concern	none breeder	grassland	09:50:00	late morning	0.5	present	1
2012-02-08	Feb	Summer 2011-12	birds	2	P03	Eskom	Chatworth	clear , cool	moderate	100	93.3	Swallow Barn	10	least concern	none breeder	aerial feeder	09:50:00	late morning	0.5	present	1
2012-02-08	Feb	Summer 2011-12	birds	2	P03	Eskom	Chatworth	clear , cool	moderate	100	93.3	Swallow White-throated	3	least concern	none breeder	aerial feeder	09:50:00	late morning	0.5	present	1
2012-02-08	Feb	Summer 2011-12	birds	2	P03	Eskom	Chatworth	clear , cool	moderate	100	93.3	Warbler Little-rush	4	least concern	no sign	marsh & welands	09:50:00	late morning	0.5	present	1
2011-11-18	Nov	Summer 2011-12	birds	1	P03A	Private	Shabangu	cloudy, cool	strong	85	76.7	Cisticola Wing-snapping	8	common	no sign	grassland	14:30:00	mid-noon	0.5	present	1
2011-11-18	Nov	Summer 2011-12	birds	1	P03A	Private	Shabangu	cloudy, cool	strong	85	76.7	Cisticola Wing-snapping	11	common	no sign	grassland	14:30:00	mid-noon	0.5	present	1
2011-11-18	Nov	Summer 2011-12	birds	1	P03A	Private	Shabangu	cloudy, cool	strong	85	76.7	Ibis Southern Bald	22	common	no sign	grassland	14:30:00	mid-noon	0.5	present	1
2011-11-18	Nov	Summer 2011-12	birds	1	P03A	Private	Shabangu	cloudy, cool	strong	85	76.7	Lapwing Crowned	21	common	no sign	grassland	14:30:00	mid-noon	0.5	present	1
2011-11-18	Nov	Summer 2011-12	birds	1	P03A	Private	Shabangu	cloudy, cool	strong	85	76.7	Lark Red-capped	1	common	breeding	grassland	14:30:00	mid-noon	0.5	present	1
2011-11-18	Nov	Summer 2011-12	birds	1	P03A	Private	Shabangu	cloudy, cool	strong	85	76.7	Lark Red-capped	3	common	breeding	grassland	14:30:00	mid-noon	0.5	present	1
2011-11-18	Nov	Summer 2011-12	birds	1	P03A	Private	Shabangu	cloudy, cool	strong	85	76.7	Lark Red-capped	7	common	breeding	grassland	14:30:00	mid-noon	0.5	present	1
2011-11-18	Nov	Summer 2011-12	birds	1	P03A	Private	Shabangu	cloudy, cool	strong	85	76.7	Lark Red-capped	9	common	breeding	grassland	14:30:00	mid-noon	0.5	present	1
2011-11-18	Nov	Summer 2011-12	birds	1	P03A	Private	Shabangu	cloudy, cool	strong	85	76.7	Lark Red-capped	11	common	breeding	grassland	14:30:00	mid-noon	0.5	present	1
2011-11-18	Nov	Summer 2011-12	birds	1	P03A	Private	Shabangu	cloudy, cool	strong	85	76.7	Lark Red-capped	19	common	breeding	grassland	14:30:00	mid-noon	0.5	present	1
2011-11-18	Nov	Summer 2011-12	birds	1	P03A	Private	Shabangu	cloudy, cool	strong	85	76.7	Martin Banded	12	common	no sign	grassland	14:30:00	mid-noon	0.5	present	1
2011-11-18	Nov	Summer 2011-12	birds	1	P03A	Private	Shabangu	cloudy, cool	strong	85	76.7	Pipit African	4	common	no sign	grassland	14:30:00	mid-noon	0.5	present	1
2011-11-18	Nov	Summer 2011-12	birds	1	P03A	Private	Shabangu	cloudy, cool	strong	85	76.7	Pipit African	6	common	no sign	grassland	14:30:00	mid-noon	0.5	present	1
2011-11-18	Nov	Summer 2011-12	birds	1	P03A	Private	Shabangu	cloudy, cool	strong	85	76.7	Pipit African	8	common	no sign	grassland	14:30:00	mid-noon	0.5	present	1
2011-11-18	Nov	Summer 2011-12	birds	1	P03A	Private	Shabangu	cloudy, cool	strong	85	76.7	Pipit African	9	common	no sign	grassland	14:30:00	mid-noon	0.5	present	1
2011-11-18	Nov	Summer 2011-12	birds	1	P03A	Private	Shabangu	cloudy, cool	strong	85	76.7	Starling Pied	3	common	breeding	grassland	14:30:00	mid-noon	0.5	present	1
2011-11-21	Nov	Summer 2011-12	birds	2	P03A	Private	Shabangu	cloudy, cold	strong	60	60	Cisticola Wing-snapping	3	common	no sign	grassland	16:00:00	late noon	0.5	present	1
2011-11-21	Nov	Summer 2011-12	birds	2	P03A	Private	Shabangu	cloudy, cold	strong	60	60	Falcon Lanner	17	common	no sign	grassland	16:00:00	late noon	0.5	present	1
2011-11-21	Nov	Summer 2011-12	birds	2	P03A	Private	Shabangu	cloudy, cold	strong	60	60	Lapwing Crowned	7	common	no sign	grassland	16:00:00	late noon	0.5	present	1
2011-11-21	Nov	Summer 2011-12	birds	2	P03A	Private	Shabangu	cloudy, cold	strong	60	60	Lark Red-capped	8	common	no sign	grassland	16:00:00	late noon	0.5	present	1
2011-11-21	Nov	Summer 2011-12	birds	2	P03A	Private	Shabangu	cloudy, cold	strong	60	60	Lark Red-capped	9	common	no sign	grassland	16:00:00	late noon	0.5	present	1
2011-11-21	Nov	Summer 2011-12	birds	2	P03A	Private	Shabangu	cloudy, cold	strong	60	60	Lark Red-capped	13	common	no sign	grassland	16:00:00	late noon	0.5	present	1
2011-11-21	Nov	Summer 2011-12	birds	2	P03A	Private	Shabangu	cloudy, cold	strong	60	60	Lark Red-capped	15	common	no sign	grassland	16:00:00	late noon	0.5	present	1
2011-11-21	Nov	Summer 2011-12	birds	2	P03A	Private	Shabangu	cloudy, cold	strong	60	60	Martin Banded	6	common	no sign	grassland	16:00:00	late noon	0.5	present	1
2011-11-21	Nov	Summer 2011-12	birds	2	P03A	Private	Shabangu	cloudy, cold	strong	60	60	Pipit African	1	common	no sign	grassland	16:00:00	late noon	0.5	present	1
2011-11-21	Nov	Summer 2011-12	birds	2	P03A	Private	Shabangu	cloudy, cold	strong	60	60	Pipit African	3	common	no sign	grassland	16:00:00	late noon	0.5	present	1
2011-11-21	Nov	Summer 2011-12	birds	2	P03A	Private	Shabangu	cloudy, cold	strong	60	60	Pipit African	9	common	no sign	grassland	16:00:00	late noon	0.5	present	1
2011-11-21	Nov	Summer 2011-12	birds	2	P03A	Private	Shabangu	cloudy, cold	strong	60	60	Pipit African	17	common	no sign	grassland	16:00:00	late noon	0.5	present	1
2011-11-21	Nov	Summer 2011-12	vegetation	3	P03A	Private	Shabangu	cloudy, cold	strong	60	60	Cisticola Cloud
2011-11-21	Nov	Summer 2011-12	vegetation	3	P03A	Private	Shabangu	cloudy, cold	strong	60	60	Crow Pied
2011-11-21	Nov	Summer 2011-12	vegetation	3	P03A	Private	Shabangu	cloudy, cold	strong	60	60	Ibis Hadeda
2011-11-21	Nov	Summer 2011-12	vegetation	3	P03A	Private	Shabangu	cloudy, cold	strong	60	60	Ibis Hadeda
2011-11-21	Nov	Summer 2011-12	vegetation	3	P03A	Private	Shabangu	cloudy, cold	strong	60	60	Lapwing Crowned
2011-11-21	Nov	Summer 2011-12	vegetation	3	P03A	Private	Shabangu	cloudy, cold	strong	60	60	swift African Black
2011-12-12	Dec	Summer 2011-12	vegetation	3	P03A	Private	Shabangu	clear, hot	strong	80	73.3	Cisticola Cloud				grassland			0.5
2011-12-12	Dec	Summer 2011-12	vegetation	3	P03A	Private	Shabangu	clear, hot	strong	80	73.3	Crane Blue			no sign	grassland			0.5
2011-12-12	Dec	Summer 2011-12	vegetation	3	P03A	Private	Shabangu	clear, hot	strong	80	73.3	Lark Red-capped			no sign	grassland			0.5
2011-12-12	Dec	Summer 2011-12	vegetation	3	P03A	Private	Shabangu	clear, hot	strong	80	73.3	Longclaw Cape			no sign	grassland			0.5
2011-12-12	Dec	Summer 2011-12	vegetation	3	P03A	Private	Shabangu	clear, hot	strong	80	73.3	Pipit African			no sign	grassland			0.5
2011-12-12	Dec	Summer 2011-12	vegetation	3	P03A	Private	Shabangu	clear, hot	strong	80	73.3	Raven White-necked			no sign	grassland			0.5
2011-12-14	Dec	Summer 2011-12	birds	1	P03A	Private	Shabangu	cloudy, cool	moderate	85	83.3	Cisticola Wing-snapping	1	least concern	no sign	grassland	08:40:00	mid-morning	0.5	present	1
2011-12-14	Dec	Summer 2011-12	birds	1	P03A	Private	Shabangu	cloudy, cold	moderate	60	66.7	Cisticola Zitting	5	least concern	no sign	grassland	08:40:00	mid-morning	0.5	present	1
2011-12-14	Dec	Summer 2011-12	birds	1	P03A	Private	Shabangu	cloudy, cold	moderate	60	66.7	Crane Blue	18	least concern	no sign	grassland	08:40:00	mid-morning	0.5	present	1
2011-12-14	Dec	Summer 2011-12	birds	1	P03A	Private	Shabangu	cloudy, cold	moderate	60	66.7	Egret Cattle	2	least concern	no sign	grassland	08:40:00	mid-morning	0.5	present	1
2011-12-14	Dec	Summer 2011-12	birds	1	P03A	Private	Shabangu	cloudy, cold	moderate	60	66.7	Lapwing Black-winged	1	least concern	breeding	grassland	08:40:00	mid-morning	0.5	present	1
2011-12-14	Dec	Summer 2011-12	birds	1	P03A	Private	Shabangu	cloudy, cool	moderate	85	83.3	Lark Eastern Long-billed	1	least concern	no sign	grassland	08:40:00	mid-morning	0.5	absent
2011-12-14	Dec	Summer 2011-12	birds	1	P03A	Private	Shabangu	cloudy, cool	moderate	85	83.3	Lark Red-capped	1	common	no sign	grassland	08:40:00	mid-morning	0.5	absent
2011-12-14	Dec	Summer 2011-12	birds	1	P03A	Private	Shabangu	cloudy, cool	moderate	85	83.3	Lark Red-capped	6	common	no sign	grassland	08:40:00	mid-morning	0.5	absent
2011-12-14	Dec	Summer 2011-12	birds	1	P03A	Private	Shabangu	cloudy, cool	moderate	85	83.3	Lark Red-capped	9	common	no sign	grassland	08:40:00	mid-morning	0.5	absent
2011-12-14	Dec	Summer 2011-12	birds	1	P03A	Private	Shabangu	cloudy, cool	moderate	85	83.3	Lark Red-capped	11	common	no sign	grassland	08:40:00	mid-morning	0.5	absent
2011-12-14	Dec	Summer 2011-12	birds	1	P03A	Private	Shabangu	cloudy, cool	moderate	85	83.3	Lark Red-capped	20	common	no sign	grassland	08:40:00	mid-morning	0.5	absent
2011-12-14	Dec	Summer 2011-12	birds	1	P03A	Private	Shabangu	cloudy, cool	moderate	85	83.3	Longclaw Cape	9	rare	no sign	grassland	08:40:00	mid-morning	0.5	absent
2011-12-14	Dec	Summer 2011-12	birds	1	P03A	Private	Shabangu	cloudy, cool	moderate	85	83.3	Pipit African	1	rare	no sign	grassland	08:40:00	mid-morning	0.5	absent
2011-12-14	Dec	Summer 2011-12	birds	1	P03A	Private	Shabangu	cloudy, cool	moderate	85	83.3	Quail Common	4	uncommon	no sign	grassland	08:40:00	mid-morning	0.5	present	1
2011-12-14	Dec	Summer 2011-12	birds	1	P03A	Private	Shabangu	cloudy, cool	moderate	85	83.3	Quail Common	9	uncommon	no sign	grassland	08:40:00	mid-morning	0.5	present	1
2011-12-14	Dec	Summer 2011-12	birds	1	P03A	Private	Shabangu	cloudy, cool	moderate	85	83.3	Starling Pied	9	least concern	no sign	grassland	08:40:00	mid-morning	0.5	present	1
2011-12-14	Dec	Summer 2011-12	birds	1	P03A	Private	Shabangu	cloudy, cool	moderate	85	83.3	Wagtail Cape	17	least concern	no sign	raptor	08:40:00	mid-morning	0.5	absent	1
2011-12-16	Dec	Summer 2011-12	birds	2	P03A	Private	Shabangu	clear, hot	moderate	80	80	Cisticola Zitting	11	uncommon	no sign	grassland	15:00:00	late noon	0.5	present
2011-12-16	Dec	Summer 2011-12	birds	2	P03A	Private	Shabangu	clear, hot	moderate	80	80	Cisticola Zitting	13	uncommon	no sign	grassland	15:00:00	late noon	0.5	present
2011-12-16	Dec	Summer 2011-12	birds	2	P03A	Private	Shabangu	clear, hot	moderate	80	80	Cisticola Zitting	21	uncommon	no sign	grassland	15:00:00	late noon	0.5	present
2011-12-16	Dec	Summer 2011-12	birds	2	P03A	Private	Shabangu	clear, hot	moderate	80	80	Crane Blue	7	rare	no sign	grassland	15:00:00	late noon	0.5	present
2011-12-16	Dec	Summer 2011-12	birds	2	P03A	Private	Shabangu	clear, hot	moderate	80	80	Lapwing Black-winged	11	least concern	no sign	grassland	15:00:00	late noon	0.5	present
2011-12-16	Dec	Summer 2011-12	birds	2	P03A	Private	Shabangu	clear, hot	moderate	80	80	Lark Red-capped	2	common	no sign	grassland	15:00:00	late noon	0.5	present
2011-12-16	Dec	Summer 2011-12	birds	2	P03A	Private	Shabangu	clear, hot	moderate	80	80	Lark Red-capped	3	common	no sign	grassland	15:00:00	late noon	0.5	present
2011-12-16	Dec	Summer 2011-12	birds	2	P03A	Private	Shabangu	clear, hot	moderate	80	80	Lark Red-capped	6	common	no sign	grassland	15:00:00	late noon	0.5	present
2011-12-16	Dec	Summer 2011-12	birds	2	P03A	Private	Shabangu	clear, hot	moderate	80	80	Lark Red-capped	7	common	no sign	grassland	15:00:00	late noon	0.5	present
2011-12-16	Dec	Summer 2011-12	birds	2	P03A	Private	Shabangu	clear, hot	moderate	80	80	Lark Red-capped	16	common	no sign	grassland	15:00:00	late noon	0.5	present
2011-12-16	Dec	Summer 2011-12	birds	2	P03A	Private	Shabangu	clear, hot	moderate	80	80	Pipit African	7	common	no sign	grassland	15:00:00	late noon	0.5	present
2011-12-16	Dec	Summer 2011-12	birds	2	P03A	Private	Shabangu	clear, hot	moderate	80	80	Pipit African	9	common	no sign	grassland	15:00:00	late noon	0.5	present
2011-12-16	Dec	Summer 2011-12	birds	2	P03A	Private	Shabangu	clear, hot	moderate	80	80	Pipit African	11	common	no sign	grassland	15:00:00	late noon	0.5	present
2011-12-16	Dec	Summer 2011-12	birds	2	P03A	Private	Shabangu	clear, hot	moderate	80	80	Pipit African	17	common	no sign	grassland	15:00:00	late noon	0.5	present
2011-12-16	Dec	Summer 2011-12	birds	2	P03A	Private	Shabangu	clear, hot	moderate	80	80	Quail Common	11	common	no sign	grassland	15:00:00	late noon	0.5	present
2011-12-16	Dec	Summer 2011-12	birds	2	P03A	Private	Shabangu	clear, hot	moderate	80	80	Quail Common	17	common	no sign	grassland	15:00:00	late noon	0.5	present
2011-12-16	Dec	Summer 2011-12	birds	2	P03A	Private	Shabangu	clear, hot	moderate	80	80	Quail Common	21	common	no sign	grassland	15:00:00	late noon	0.5	present
2011-12-16	Dec	Summer 2011-12	birds	2	P03A	Private	Shabangu	clear, hot	moderate	80	80	Starling Pied	1	least concern	no sign	grassland	15:00:00	late noon	0.5	present
2012-01-10	Jan	Summer 2011-12	birds	1	P03A	Private	Shabangu	clear , cool	moderate	100	93.3	Pipit African	1	abundant	no sign	grassland	10:30:00	late morning	0.5	absent	1
2012-01-10	Jan	Summer 2011-12	birds	1	P03A	Private	Shabangu	clear , cool	moderate	100	93.3	Pipit African	3	abundant	no sign	grassland	10:30:00	late morning	0.5	absent	1
2012-01-10	Jan	Summer 2011-12	birds	1	P03A	Private	Shabangu	clear , cool	moderate	100	93.3	Pipit African	4	abundant	no sign	grassland	10:30:00	late morning	0.5	absent	1
2012-01-10	Jan	Summer 2011-12	birds	1	P03A	Private	Shabangu	clear , cool	moderate	100	93.3	Pipit African	5	abundant	no sign	grassland	10:30:00	late morning	0.5	absent	1
2012-01-10	Jan	Summer 2011-12	birds	1	P03A	Private	Shabangu	clear , cool	moderate	100	93.3	Pipit African	7	abundant	no sign	grassland	10:30:00	late morning	0.5	absent	1
2012-01-10	Jan	Summer 2011-12	birds	1	P03A	Private	Shabangu	clear , cool	moderate	100	93.3	Pipit African	10	abundant	no sign	grassland	10:30:00	late morning	0.5	absent	1
2012-01-10	Jan	Summer 2011-12	birds	1	P03A	Private	Shabangu	clear , cool	moderate	100	93.3	Pipit African	17	abundant	no sign	grassland	10:30:00	late morning	0.5	absent	1
2012-01-10	Jan	Summer 2011-12	birds	1	P03A	Private	Shabangu	clear , cool	moderate	100	93.3	Pipit African	21	abundant	no sign	grassland	10:30:00	late morning	0.5	absent	1
2012-01-10	Jan	Summer 2011-12	birds	1	P03A	Private	Shabangu	clear , cool	moderate	100	93.3	Chat Ant-eating	19	least concern	no sign	grassland	10:30:00	late morning	0.5	present	1
2012-01-10	Jan	Summer 2011-12	birds	1	P03A	Private	Shabangu	clear , cool	moderate	100	93.3	Cisticola Cloud	10	least concern	no sign	grassland	10:30:00	late morning	0.5	present	1
2012-01-10	Jan	Summer 2011-12	birds	1	P03A	Private	Shabangu	clear , cool	moderate	100	93.3	Cisticola Wing-snapping	1	least concern	no sign	grassland	10:30:00	late morning	0.5	present	1
2012-01-10	Jan	Summer 2011-12	birds	1	P03A	Private	Shabangu	clear , cool	moderate	100	93.3	Crane Blue	1	least concern	no sign	grassland	10:30:00	late morning	0.5	present	1
2012-01-10	Jan	Summer 2011-12	birds	1	P03A	Private	Shabangu	clear , cool	moderate	100	93.3	Swallow Greater-striped	24	least concern	no sign	aerial feeder	10:30:00	late morning	0.5	present	1
2012-01-10	Jan	Summer 2011-12	birds	1	P03A	Private	Shabangu	clear , cool	moderate	100	93.3	Crane Grey Crowned	5	least concern	no sign	wetland	10:30:00	late morning	0.5	present	1
2012-01-10	Jan	Summer 2011-12	birds	1	P03A	Private	Shabangu	clear , cool	moderate	100	93.3	Crow Cape	1	least concern	no sign	grassland	10:30:00	late morning	0.5	present	1
2012-01-10	Jan	Summer 2011-12	birds	1	P03A	Private	Shabangu	clear , cool	moderate	100	93.3	Falcon Amur	1	uncommon	no sign	grassland raptor	10:30:00	late morning	0.5	present	1
2012-01-10	Jan	Summer 2011-12	birds	1	P03A	Private	Shabangu	clear , cool	moderate	100	93.3	Falcon Amur	19	uncommon	no sign	grassland raptor	10:30:00	late morning	0.5	present	1
2012-01-10	Jan	Summer 2011-12	birds	1	P03A	Private	Shabangu	clear , cool	moderate	100	93.3	Lapwing Black-winged	25	least concern	no sign	grassland	10:30:00	late morning	0.5	absent	1
2012-01-10	Jan	Summer 2011-12	birds	1	P03A	Private	Shabangu	clear , cool	moderate	100	93.3	Lark Red-capped	8	common	no sign	grassland	10:30:00	late morning	0.5	absent	1
2012-01-10	Jan	Summer 2011-12	birds	1	P03A	Private	Shabangu	clear , cool	moderate	100	93.3	Lark Red-capped	24	common	no sign	grassland	10:30:00	late morning	0.5	absent	1
2012-01-10	Jan	Summer 2011-12	birds	2	P03A	Private	Shabangu	clear , cool	moderate	100	93.3	Falcon Amur	15	uncommon	no sign	grassland raptor	17:10:00	late-noon	0.5	present	1
2012-01-10	Jan	Summer 2011-12	birds	2	P03A	Private	Shabangu	clear , cool	moderate	100	93.3	Buzzard Steppe	22	least concern	no sign	raptor	17:10:00	late-noon	0.5	present	1
2012-01-10	Jan	Summer 2011-12	birds	2	P03A	Private	Shabangu	clear , cool	moderate	100	93.3	Lark Red-capped	2	common	no sign	grassland	17:10:00	late-noon	0.5	absent	1
2012-01-10	Jan	Summer 2011-12	birds	2	P03A	Private	Shabangu	clear , cool	moderate	100	93.3	Lark Red-capped	21	common	no sign	grassland	17:10:00	late-noon	0.5	absent	1
2012-01-10	Jan	Summer 2011-12	birds	2	P03A	Private	Shabangu	clear , cool	moderate	100	93.3	Lark Red-capped	25	common	no sign	grassland	17:10:00	late-noon	0.5	absent	1
2012-01-10	Jan	Summer 2011-12	birds	2	P03A	Private	Shabangu	clear , cool	moderate	100	93.3	Longclaw Cape	3	uncommon	no sign	grassland	17:10:00	late-noon	0.5	present	1
2012-01-10	Jan	Summer 2011-12	birds	2	P03A	Private	Shabangu	clear , cool	moderate	100	93.3	Longclaw Cape	7	uncommon	no sign	grassland	17:10:00	late-noon	0.5	present	1
2012-01-10	Jan	Summer 2011-12	birds	2	P03A	Private	Shabangu	clear , cool	moderate	100	93.3	Martin Banded	25	least concern	no sign	aerial feeder	17:10:00	late-noon	0.5	present	1
2012-01-10	Jan	Summer 2011-12	birds	2	P03A	Private	Shabangu	clear , cool	moderate	100	93.3	Cisticola Wing-snapping	1	least concern	no sign	grassland	17:10:00	late-noon	0.5	present	1
2012-01-10	Jan	Summer 2011-12	birds	2	P03A	Private	Shabangu	clear , cool	moderate	100	93.3	Cisticola Cloud	1	least concern	no sign	grassland	17:10:00	late-noon	0.5	present	1
2012-01-10	Jan	Summer 2011-12	birds	2	P03A	Private	Shabangu	clear , cool	moderate	100	93.3	Pipit African	1	abundant	no sign	grassland	17:10:00	late-noon	0.5	present	1
2012-01-10	Jan	Summer 2011-12	birds	2	P03A	Private	Shabangu	clear , cool	moderate	100	93.3	Pipit African	2	abundant	no sign	grassland	17:10:00	late-noon	0.5	present	1
2012-01-10	Jan	Summer 2011-12	birds	2	P03A	Private	Shabangu	clear , cool	moderate	100	93.3	Pipit African	3	abundant	no sign	grassland	17:10:00	late-noon	0.5	present	1
2012-01-10	Jan	Summer 2011-12	birds	2	P03A	Private	Shabangu	clear , cool	moderate	100	93.3	Pipit African	8	abundant	no sign	grassland	17:10:00	late-noon	0.5	present	1
2012-01-10	Jan	Summer 2011-12	birds	2	P03A	Private	Shabangu	clear , cool	moderate	100	93.3	Pipit African	10	abundant	no sign	grassland	17:10:00	late-noon	0.5	present	1
2012-01-10	Jan	Summer 2011-12	birds	2	P03A	Private	Shabangu	clear , cool	moderate	100	93.3	Pipit African	12	abundant	no sign	grassland	17:10:00	late-noon	0.5	present	1
2012-01-10	Jan	Summer 2011-12	birds	2	P03A	Private	Shabangu	clear , cool	moderate	100	93.3	Quailfinch African	21	rare	no sign	grassland	17:10:00	late-noon	0.5	present	1
2012-01-10	Jan	Summer 2011-12	birds	2	P03A	Private	Shabangu	clear , cool	moderate	100	93.3	Starling Pied	26	least concern	no sign	grassland	17:10:00	late-noon	0.5	present	1
2012-01-10	Jan	Summer 2011-12	vegetation	3	P03A	Private	Shabangu	clear, hot	calm	80	86.7	Cisticola Cloud				grassland			0.5
2012-01-10	Jan	Summer 2011-12	vegetation	3	P03A	Private	Shabangu	clear, hot	calm	80	86.7	Crane Grey Crowned				wetland			0.5
2012-01-10	Jan	Summer 2011-12	vegetation	3	P03A	Private	Shabangu	clear, hot	calm	80	86.7	Crow Cape				grassland			0.5
2012-01-10	Jan	Summer 2011-12	vegetation	3	P03A	Private	Shabangu	clear, hot	calm	80	86.7	Falcon Amur				grassland raptor			0.5
2012-01-10	Jan	Summer 2011-12	vegetation	3	P03A	Private	Shabangu	clear, hot	calm	80	86.7	Lark Red-capped				grassland			0.5
2012-01-10	Jan	Summer 2011-12	vegetation	3	P03A	Private	Shabangu	clear, hot	calm	80	86.7	Martin Banded				aerial feeder			0.5
2012-01-10	Jan	Summer 2011-12	vegetation	3	P03A	Private	Shabangu	clear, hot	calm	80	86.7	Pipit African				grassland			0.5
2012-01-10	Jan	Summer 2011-12	vegetation	3	P03A	Private	Shabangu	clear, hot	calm	80	86.7	Pipit Yellow-breasted				grassland			0.5
2012-02-06	Feb	Summer 2011-12	birds	1	P03A	Private	Shabangu	partly cloudy, hot	strong	70	66.7	Cisticola Wing-snapping	1	least concern	no sign	grassland	15:30:00	mid-noon	0.5	present	1
2012-02-06	Feb	Summer 2011-12	birds	1	P03A	Private	Shabangu	partly cloudy, hot	strong	70	66.7	Falcon Amur	1	uncommon	none breeder	grassland raptor	15:30:00	mid-noon	0.5	present	1
2012-02-06	Feb	Summer 2011-12	birds	1	P03A	Private	Shabangu	partly cloudy, hot	strong	70	66.7	Falcon Amur	4	uncommon	none breeder	grassland raptor	15:30:00	mid-noon	0.5	present	1
2012-02-06	Feb	Summer 2011-12	birds	1	P03A	Private	Shabangu	partly cloudy, hot	strong	70	66.7	Falcon Amur	23	uncommon	none breeder	grassland raptor	15:30:00	mid-noon	0.5	present	1
2012-02-06	Feb	Summer 2011-12	birds	1	P03A	Private	Shabangu	partly cloudy, hot	strong	70	66.7	Lark Red-capped	4	rare	no sign	grassland	15:30:00	mid-noon	0.5	present	1
2012-02-06	Feb	Summer 2011-12	birds	1	P03A	Private	Shabangu	partly cloudy, hot	strong	70	66.7	Pipit African	2	common	breeding	grassland	15:30:00	mid-noon	0.5	present	1
2012-02-06	Feb	Summer 2011-12	birds	1	P03A	Private	Shabangu	partly cloudy, hot	strong	70	66.7	Pipit African	3	common	breeding	grassland	15:30:00	mid-noon	0.5	present	1
2012-02-06	Feb	Summer 2011-12	birds	1	P03A	Private	Shabangu	partly cloudy, hot	strong	70	66.7	Pipit African	5	common	breeding	grassland	15:30:00	mid-noon	0.5	present	1
2012-02-06	Feb	Summer 2011-12	birds	1	P03A	Private	Shabangu	partly cloudy, hot	strong	70	66.7	Pipit African	7	common	breeding	grassland	15:30:00	mid-noon	0.5	present	1
2012-02-06	Feb	Summer 2011-12	birds	1	P03A	Private	Shabangu	partly cloudy, hot	strong	70	66.7	Pipit African	23	common	breeding	grassland	15:30:00	mid-noon	0.5	present	1
2012-02-06	Feb	Summer 2011-12	birds	1	P03A	Private	Shabangu	partly cloudy, hot	strong	70	66.7	Swallow Barn	3	least concern	none breeder	aerial feeder	15:30:00	mid-noon	0.5	present	1
2012-02-06	Feb	Summer 2011-12	vegetation	3	P03A	Private	Shabangu	partly cloudy, hot	moderate	70	73.3	Falcon Amur				grassland raptor			0.5
2012-02-06	Feb	Summer 2011-12	vegetation	3	P03A	Private	Shabangu	partly cloudy, hot	moderate	70	73.3	Lark Red-capped				grassland			0.5
2012-02-06	Feb	Summer 2011-12	vegetation	3	P03A	Private	Shabangu	partly cloudy, hot	moderate	70	73.3	Martin Banded				aerial feeder			0.5
2012-02-06	Feb	Summer 2011-12	vegetation	3	P03A	Private	Shabangu	partly cloudy, hot	moderate	70	73.3	Pipit African				grassland			0.5
2012-02-06	Feb	Summer 2011-12	vegetation	3	P03A	Private	Shabangu	partly cloudy, hot	moderate	70	73.3	Swallow Barn				aerial feeder			0.5
2012-02-09	Feb	Summer 2011-12	birds	2	P03A	Private	Shabangu	cloudy, cool	moderate	85	83.3	Cisticola Cloud	16	least concern	no sign	grassland	09:30:00	late morning	0.5	present	1
2012-02-09	Feb	Summer 2011-12	birds	2	P03A	Private	Shabangu	cloudy, cool	moderate	85	83.3	Cisticola Wing-snapping	12	least concern	no sign	grassland	09:30:00	late morning	0.5	present	1
2012-02-09	Feb	Summer 2011-12	birds	2	P03A	Private	Shabangu	cloudy, cool	moderate	85	83.3	cliff-swallow South African	1	least concern	none breeder	aerial feeder	09:30:00	late morning	0.5	present	1
2012-02-09	Feb	Summer 2011-12	birds	2	P03A	Private	Shabangu	cloudy, cool	moderate	85	83.3	Lark Red-capped	17	uncommon	no sign	grassland	09:30:00	late morning	0.5	present	1
2012-02-09	Feb	Summer 2011-12	birds	2	P03A	Private	Shabangu	cloudy, cool	moderate	85	83.3	Lark Red-capped	29	uncommon	no sign	grassland	09:30:00	late morning	0.5	present	1
2012-02-09	Feb	Summer 2011-12	birds	2	P03A	Private	Shabangu	cloudy, cool	moderate	85	83.3	Martin Banded	1	least concern	no sign	aerial feeder	09:30:00	late morning	0.5	present	1
2012-02-09	Feb	Summer 2011-12	birds	2	P03A	Private	Shabangu	cloudy, cool	moderate	85	83.3	Pipit African	1	uncommon	no sign	grassland	09:30:00	late morning	0.5	present	1
2012-02-09	Feb	Summer 2011-12	birds	2	P03A	Private	Shabangu	cloudy, cool	moderate	85	83.3	Pipit African	9	uncommon	no sign	grassland	09:30:00	late morning	0.5	present	1
2012-02-09	Feb	Summer 2011-12	birds	2	P03A	Private	Shabangu	cloudy, cool	moderate	85	83.3	Pipit African	12	uncommon	no sign	grassland	09:30:00	late morning	0.5	present	1
2012-02-09	Feb	Summer 2011-12	birds	2	P03A	Private	Shabangu	cloudy, cool	moderate	85	83.3	Swallow Barn	1	least concern	none breeder	aerial feeder	09:30:00	late morning	0.5	present	1
2010-03-05	March	Autumn 2010	birds	1	P04	Eskom	Braamhoek	partly cloudy, cool	strong	90	80	Cisticola Levaillant's	1	least concern	no sign	grassland	09:24:00	late morning	0.25	absent	1	0	1	0
2010-03-05	March	Autumn 2010	birds	1	P04	Eskom	Braamhoek	partly cloudy, cool	strong	90	80	Cisticola Pale-crowned	10	least concern	no sign	grassland	09:24:00	late morning	0.25	absent	1	0	1	0
2010-03-05	March	Autumn 2010	birds	1	P04	Eskom	Braamhoek	partly cloudy, cool	strong	90	80	Crow Cape	7	least concern	no sign	grassland	09:24:00	late morning	0.25	absent	1	0	1	0
2010-03-05	March	Autumn 2010	birds	1	P04	Eskom	Braamhoek	clear, cold	moderate	75	76.7	Longclaw Cape	1	rare	no sign	grassland	09:24:00	late morning	0.25	present	1	0	1	0
2010-03-05	March	Autumn 2010	birds	1	P04	Eskom	Braamhoek	clear, cold	moderate	75	76.7	Martin Banded	14	least concern	no sign	aerial feeder	09:24:00	late morning	0.25	present	1	0	1	0
2010-03-05	March	Autumn 2010	birds	1	P04	Eskom	Braamhoek	clear, cold	moderate	75	76.7	Waxbill Common	7	least concern	no sign	grassland	09:24:00	late morning	0.25	present	1	1	0	0
2010-04-08	April	Autumn 2010	birds	2	P04	Eskom	Braamhoek	partly cloudy, cool	strong	90	80	Cisticola Wing-snapping	7	least concern	no sign	grassland	10:45:00	late morning	0.25	absent	1	0	1	0
2010-04-08	April	Autumn 2010	birds	2	P04	Eskom	Braamhoek	partly cloudy, cool	strong	90	80	Lark Red-capped	1	rare	no sign	grassland	10:45:00	late morning	0.25	absent	1	0	1	0
2010-04-08	April	Autumn 2010	birds	2	P04	Eskom	Braamhoek	partly cloudy, cool	strong	90	80	Longclaw Cape	14	rare	no sign	grassland	10:45:00	late morning	0.25	absent	1	0	0	1
2010-04-08	April	Autumn 2010	birds	2	P04	Eskom	Braamhoek	partly cloudy, cool	strong	90	80	Martin Banded	2	least concern	no sign	aerial feeder	10:45:00	late morning	0.25	absent	1	0	1	0
2010-04-08	April	Autumn 2010	birds	2	P04	Eskom	Braamhoek	partly cloudy, cool	strong	90	80	Quailfinch African	17	rare	no sign	grassland	10:45:00	late morning	0.25	absent	1	0	1	0
2010-04-08	April	Autumn 2010	birds	2	P04	Eskom	Braamhoek	partly cloudy, cool	strong	90	80	Swallow Barn	7	least concern	no sign	aerial feeder	10:45:00	late morning	0.25	absent	1	0	1	0
2010-04-08	April	Autumn 2010	birds	2	P04	Eskom	Braamhoek	partly cloudy, cool	strong	90	80	Swallow Greater-striped	9	least concern	no sign	aerial feeder	10:45:00	late morning	0.25	absent	1	0	1	0
2010-04-08	April	Autumn 2010	birds	2	P04	Eskom	Braamhoek	partly cloudy, cool	strong	90	80	swift African Black	4	least concern	no sign	aerial feeder	10:45:00	late morning	0.25	absent	1	0	1	0
2010-04-08	April	Autumn 2010	birds	2	P04	Eskom	Braamhoek	partly cloudy, cool	strong	90	80	Swift Alpine	8	least concern	no sign	aerial feeder	10:45:00	late morning	0.25	absent	1	0	1	0
2010-04-08	April	Autumn 2010	birds	2	P04	Eskom	Braamhoek	partly cloudy, cool	strong	90	80	Swift white-rumped	8	least concern	no sign	aerial feeder	10:45:00	late morning	0.25	absent	1	0	1	0
2010-03-05	March	Autumn 2010	birds	1	P07	Eskom	Bedford	partly cloudy, cool	strong	90	80	Cisticola Cloud	20	least concern	no sign	grassland	11:09:00	mid-day	0.25	absent	1	0	1	0
2010-03-05	March	Autumn 2010	birds	1	P07	Eskom	Bedford	partly cloudy, cool	strong	90	80	Cisticola Wing-snapping	11	least concern	no sign	grassland	11:09:00	mid-day	0.25	absent	1	0	1	0
2010-03-05	March	Autumn 2010	birds	1	P07	Eskom	Bedford	partly cloudy, cool	strong	90	80	Falcon Amur	1	rare	no sign	grassland raptor	11:09:00	mid-day	0.25	absent	1	0	1	0
2010-03-05	March	Autumn 2010	birds	1	P07	Eskom	Bedford	clear, cold	moderate	75	76.7	Longclaw Cape	3	uncommon	no sign	grassland	11:09:00	mid-day	0.25	present	1	0	1	0
2010-03-05	March	Autumn 2010	birds	1	P07	Eskom	Bedford	clear, cold	moderate	75	76.7	Longclaw Cape	7	uncommon	no sign	grassland	11:09:00	mid-day	0.25	present	1	1	0	0
2010-03-05	March	Autumn 2010	birds	1	P07	Eskom	Bedford	clear, cold	moderate	75	76.7	Martin Banded	3	least concern	no sign	aerial feeder	11:09:00	mid-day	0.25	present	1	0	1	0
2010-03-05	March	Autumn 2010	birds	1	P07	Eskom	Bedford	clear, cold	moderate	75	76.7	Stork White	11	least concern	no sign	grassland	11:09:00	mid-day	0.25	present	1	0	1	0
2010-03-05	March	Autumn 2010	birds	1	P07	Eskom	Bedford	clear, cold	moderate	75	76.7	Swift Horus	14	least concern	no sign	aerial feeder	11:09:00	mid-day	0.25	present	1	1	0	0
2010-04-09	April	Autumn 2010	birds	2	P07	Eskom	Bedford	partly cloudy, cool	strong	90	80	Buzzard Jackal	2	least concern	no sign	raptor	08:40:00	mid-morning	0.25	absent	1	0	1	0
2010-04-09	April	Autumn 2010	birds	2	P07	Eskom	Bedford	partly cloudy, cool	strong	90	80	Chat Ant-eating	3	least concern	no sign	grassland	08:40:00	mid-morning	0.25	absent	1	0	1	0
2010-04-09	April	Autumn 2010	birds	2	P07	Eskom	Bedford	partly cloudy, cool	strong	90	80	Cisticola Wing-snapping	1	least concern	no sign	grassland	08:40:00	mid-morning	0.25	absent	1	0	1	0
2010-04-09	April	Autumn 2010	birds	2	P07	Eskom	Bedford	partly cloudy, cool	strong	90	80	Harrier Black	19	least concern	no sign	grassland	08:40:00	mid-morning	0.25	absent	1	0	1	0
2010-04-09	April	Autumn 2010	birds	2	P07	Eskom	Bedford	partly cloudy, cool	strong	90	80	Longclaw Cape	3	least concern	no sign	grassland	08:40:00	mid-morning	0.25	absent	1	0	1	0
2010-04-09	April	Autumn 2010	birds	2	P07	Eskom	Bedford	partly cloudy, cool	strong	90	80	Martin Banded	1	least concern	no sign	aerial feeder	08:40:00	mid-morning	0.25	present	1	0	1	0
2010-04-09	April	Autumn 2010	birds	2	P07	Eskom	Bedford	partly cloudy, cool	strong	90	80	Pipit Yellow-breasted	1	rare	no sign	grassland	08:40:00	mid-morning	0.25	present	1	0	1	0
2011-03-04	March	Autumn 2010-11	vegetation	3	P07	Eskom	Bedford					Cisticola Wing-snapping				grassland			0.5
2011-03-04	March	Autumn 2010-11	vegetation	3	P07	Eskom	Bedford					Cisticola Zitting				grassland			0.5
2011-03-04	March	Autumn 2010-11	vegetation	3	P07	Eskom	Bedford					Crow Cape				grassland			0.5
2011-03-04	March	Autumn 2010-11	vegetation	3	P07	Eskom	Bedford					Falcon Amur				grassland raptor			0.5
2011-03-04	March	Autumn 2010-11	vegetation	3	P07	Eskom	Bedford					Longclaw Cape				grassland			0.5
2011-03-04	March	Autumn 2010-11	vegetation	3	P07	Eskom	Bedford					Swallow Barn				aerial feeder			0.5
2011-03-04	March	Autumn 2010-11	vegetation	3	P07	Eskom	Bedford					Swallow-cliff South African				aerial feeder			0.5
2011-03-07	March	Autumn 2010-11	vegetation	3	P07	Eskom	Bedford					Cisticola Wing-snapping				grassland			0.5
2011-03-07	March	Autumn 2010-11	vegetation	3	P07	Eskom	Bedford					Cisticola Zitting				grassland			0.5
2011-03-07	March	Autumn 2010-11	vegetation	3	P07	Eskom	Bedford					Falcon Amur				grassland raptor			0.5
2011-03-07	March	Autumn 2010-11	vegetation	3	P07	Eskom	Bedford					Swallow-cliff South African				aerial feeder			0.5
2011-03-07	March	Autumn 2010-11	vegetation	3	P07	Eskom	Bedford					Widowbird Long-tailed				grassland			0.5
2011-03-04	March	Autumn 2011	birds	1	P07	Eskom	Bedford	clear , cool	moderate	100	93.3	Cisticola Wing-snapping	2	least concern	no sign	grassland	10:30:00	late morning	0.5	absent	1	0	1	0
2011-03-04	March	Autumn 2011	birds	1	P07	Eskom	Bedford	clear , cool	moderate	100	93.3	Cisticola Zitting	16	least concern	no sign	grassland	10:30:00	late morning	0.5	absent	1	0	1	0
2011-03-04	March	Autumn 2011	birds	1	P07	Eskom	Bedford	clear , cool	moderate	100	93.3	cliff-swallow South African	27	least concern	no sign	aerial feeder	10:30:00	late morning	0.5	absent	1	1	0	0
2011-03-04	March	Autumn 2011	birds	1	P07	Eskom	Bedford	partly cloudy, cool	moderate	90	86.7	Crow Cape	7	least concern	no sign	grassland	10:30:00	late morning	0.5	present	1	0	1	0
2011-03-04	March	Autumn 2011	birds	1	P07	Eskom	Bedford	partly cloudy, cool	moderate	90	86.7	Falcon Amur	2	rare	no sign	grassland raptor	10:30:00	late morning	0.5	present	1	0	1	0
2011-03-04	March	Autumn 2011	birds	1	P07	Eskom	Bedford	partly cloudy, cool	moderate	90	86.7	Longclaw Cape	1	rare	no sign	grassland	10:30:00	late morning	0.5	present	1	0	1	0
2011-03-04	March	Autumn 2011	birds	1	P07	Eskom	Bedford	partly cloudy, cool	moderate	90	86.7	Martin Banded	5	least concern	no sign	aerial feeder	10:30:00	late morning	0.5	present	1	0	1	0
2011-03-09	March	Autumn 2011	birds	2	P07	Eskom	Bedford	partly cloudy, cool	moderate	90	86.7	Bustard Denham's	27	rare	no sign	grassland	09:00:00	late morning	0.5	absent	1	1	0	0
2011-03-09	March	Autumn 2011	birds	2	P07	Eskom	Bedford	partly cloudy, cool	moderate	90	86.7	Cisticola Wing-snapping	4	least concern	no sign	grassland	09:00:00	late morning	0.5	absent	1	0	1	0
2011-03-09	March	Autumn 2011	birds	2	P07	Eskom	Bedford	partly cloudy, cool	moderate	90	86.7	Falcon Amur	1	rare	no sign	grassland raptor	09:00:00	late morning	0.5	absent	1	0	1	0
2011-03-09	March	Autumn 2011	birds	2	P07	Eskom	Bedford	partly cloudy, cool	moderate	90	86.7	Longclaw Cape	3	common	no sign	grassland	09:00:00	late morning	0.5	absent	1	0	1	0
2011-03-09	March	Autumn 2011	birds	2	P07	Eskom	Bedford	partly cloudy, cool	moderate	90	86.7	Longclaw Cape	8	common	no sign	grassland	09:00:00	late morning	0.5	absent	1	0	1	0
2011-03-09	March	Autumn 2011	birds	2	P07	Eskom	Bedford	partly cloudy, cool	moderate	90	86.7	Longclaw Cape	9	common	no sign	grassland	09:00:00	late morning	0.5	present	1	0	1	0
2011-03-09	March	Autumn 2011	birds	2	P07	Eskom	Bedford	partly cloudy, cool	moderate	90	86.7	Longclaw Cape	18	common	no sign	grassland	09:00:00	late morning	0.5	present	1	1	0	0
2011-03-09	March	Autumn 2011	birds	2	P07	Eskom	Bedford	partly cloudy, cool	moderate	90	86.7	Martin Banded	1	least concern	no sign	aerial feeder	09:00:00	late morning	0.5	present	1	0	0	1
2011-03-09	March	Autumn 2011	birds	2	P07	Eskom	Bedford	partly cloudy, cool	moderate	90	86.7	Quailfinch African	18	rare	no sign	grassland	09:00:00	late morning	0.5	present	1	1	0	0
2011-03-09	March	Autumn 2011	birds	2	P07	Eskom	Bedford	partly cloudy, cool	moderate	90	86.7	Swallow Greater-striped	8	least concern	no sign	aerial feeder	09:00:00	late morning	0.5	present	1	1	0	0
2010-10-12	October	Spring 2010	birds	1	P07	Eskom	Bedford	clear , cool	strong	100	86.7	Canary Cape	3	least concern	no sign	scrub & forests	10:20:00	late morning	0.5	absent	1	0	0	1
2010-10-12	October	Spring 2010	birds	1	P07	Eskom	Bedford	clear , cool	strong	100	86.7	Lark Red-capped	20	abundant	no sign	grassland	10:20:00	late morning	0.5	absent	1	0	1	0
2010-10-12	October	Spring 2010	birds	1	P07	Eskom	Bedford	partly cloudy, cold	strong	65	63.3	Lark Red-capped	1	abundant	no sign	grassland	10:20:00	late morning	0.5	absent	1	0	0	1
2010-10-12	October	Spring 2010	birds	1	P07	Eskom	Bedford	partly cloudy, cold	strong	65	63.3	Lark Red-capped	2	abundant	no sign	grassland	10:20:00	late morning	0.5	absent	1	0	0	1
2010-10-12	October	Spring 2010	birds	1	P07	Eskom	Bedford	partly cloudy, cold	strong	65	63.3	Lark Red-capped	3	abundant	no sign	grassland	10:20:00	late morning	0.5	absent	1	0	1	0
2010-10-12	October	Spring 2010	birds	1	P07	Eskom	Bedford	partly cloudy, cold	strong	65	63.3	Lark Red-capped	4	abundant	no sign	grassland	10:20:00	late morning	0.5	absent	1	0	1	0
2010-10-12	October	Spring 2010	birds	1	P07	Eskom	Bedford	partly cloudy, cold	strong	65	63.3	Lark Red-capped	6	abundant	no sign	grassland	10:20:00	late morning	0.5	absent	1	0	1	0
2010-10-12	October	Spring 2010	birds	1	P07	Eskom	Bedford	partly cloudy, cold	strong	65	63.3	Lark Red-capped	18	abundant	no sign	grassland	10:20:00	late morning	0.5	absent	1	0	1	0
2010-10-12	October	Spring 2010	birds	1	P07	Eskom	Bedford	clear , cool	strong	100	86.7	Longclaw Cape	26	rare	no sign	grassland	10:20:00	late morning	0.5	absent	1	0	0	1
2010-10-12	October	Spring 2010	birds	1	P07	Eskom	Bedford	clear , cool	strong	100	86.7	Pipit African	1	uncommon	no sign	grassland	10:20:00	late morning	0.5	absent	1	0	1	0
2010-10-12	October	Spring 2010	birds	1	P07	Eskom	Bedford	clear , cool	strong	100	86.7	Pipit African	3	uncommon	no sign	grassland	10:20:00	late morning	0.5	absent	1	0	1	0
2010-10-12	October	Spring 2010	birds	1	P07	Eskom	Bedford	clear , cool	strong	100	86.7	Pipit African	6	uncommon	no sign	grassland	10:20:00	late morning	0.5	absent	1	0	1	0
2010-10-25	October	Spring 2010	birds	2	P07	Eskom	Bedford	clear , cool	strong	100	86.7	Lark Red-capped	11	common	no sign	grassland	09:20:00	late morning	0.5	absent	1	0	1	0
2010-10-25	October	Spring 2010	birds	2	P07	Eskom	Bedford	clear , cool	strong	100	86.7	Lark Red-capped	17	common	no sign	grassland	09:20:00	late morning	0.5	absent	1	0	1	0
2010-10-25	October	Spring 2010	birds	2	P07	Eskom	Bedford	clear , cool	strong	100	86.7	Lark Red-capped	24	common	no sign	grassland	09:20:00	late morning	0.5	absent	1	0	1	0
2010-10-25	October	Spring 2010	birds	2	P07	Eskom	Bedford	clear , cool	strong	100	86.7	Lark Red-capped	25	common	no sign	grassland	09:20:00	late morning	0.5	absent	1	1	0	0
2010-10-25	October	Spring 2010	birds	2	P07	Eskom	Bedford	clear , cool	strong	100	86.7	Longclaw Cape	1	rare	no sign	grassland	09:20:00	late morning	0.5	absent	1	0	0	1
2010-10-25	October	Spring 2010	birds	2	P07	Eskom	Bedford	clear , cool	strong	100	86.7	Martin Banded	2	least concern	no sign	aerial feeder	09:20:00	late morning	0.5	absent	1	1	0	0
2010-10-25	October	Spring 2010	birds	2	P07	Eskom	Bedford	clear, cold	strong	75	70	Pipit African	2	common	no sign	grassland	09:20:00	late morning	0.5	absent	1	1	0	0
2010-10-25	October	Spring 2010	birds	2	P07	Eskom	Bedford	clear, cold	strong	75	70	Pipit African	11	common	no sign	grassland	09:20:00	late morning	0.5	absent	1	0	1	0
2010-10-25	October	Spring 2010	birds	2	P07	Eskom	Bedford	clear, cold	strong	75	70	Pipit African	20	common	no sign	grassland	09:20:00	late morning	0.5	absent	1	0	1	0
2010-10-25	October	Spring 2010	birds	2	P07	Eskom	Bedford	clear, cold	strong	75	70	Pipit African	26	common	no sign	grassland	09:20:00	late morning	0.5	absent	1	0	1	0
2010-10-25	October	Spring 2010	birds	2	P07	Eskom	Bedford	clear, cold	strong	75	70	Pipit Yellow-breasted	23	uncommon	no sign	grassland	09:20:00	late morning	0.5	absent	1	0	1	0
2010-10-25	October	Spring 2010	birds	2	P07	Eskom	Bedford	clear, cold	strong	75	70	Pipit Yellow-breasted	24	uncommon	no sign	grassland	09:20:00	late morning	0.5	absent	1	0	1	0
2010-12-07	Dec	Summer 2010-11	birds	1	P07	Eskom	Bedford	partly cloudy, cool	moderate	90	86.7	Bishop Southern-red	25	least concern	no sign	grassland	16:15:00	late-noon	0.5	absent	1	0	1	0
2010-12-07	Dec	Summer 2010-11	birds	1	P07	Eskom	Bedford	partly cloudy, cool	moderate	90	86.7	Bishop Yellow-crowned	27	least concern	no sign	grassland	16:15:00	late-noon	0.5	absent	1	0	1	0
2010-12-07	Dec	Summer 2010-11	birds	1	P07	Eskom	Bedford	partly cloudy, cool	moderate	90	86.7	Canary Cape	26	least concern	no sign	scrub & forests	16:15:00	late-noon	0.5	absent	1	0	1	0
2010-12-07	Dec	Summer 2010-11	birds	1	P07	Eskom	Bedford	partly cloudy, cool	moderate	90	86.7	Cisticola Cloud	27	least concern	no sign	grassland	16:15:00	late-noon	0.5	absent	1	0	1	0
2010-12-07	Dec	Summer 2010-11	birds	1	P07	Eskom	Bedford	partly cloudy, cool	moderate	90	86.7	Cisticola Wing-snapping	4	least concern	no sign	grassland	16:15:00	late-noon	0.5	absent	1	0	1	0
2010-12-07	Dec	Summer 2010-11	birds	1	P07	Eskom	Bedford	partly cloudy, cool	moderate	90	86.7	Cisticola Zitting	1	least concern	no sign	grassland	16:15:00	late-noon	0.5	absent	1	0	1	0
2010-12-07	Dec	Summer 2010-11	birds	1	P07	Eskom	Bedford	partly cloudy, cool	moderate	90	86.7	Martin Banded	15	least concern	no sign	aerial feeder	16:15:00	late-noon	0.5	absent	1	0	1	0
2010-12-07	Dec	Summer 2010-11	birds	1	P07	Eskom	Bedford	partly cloudy, cool	moderate	90	86.7	Quail Common	1	uncommon	no sign	grassland	16:15:00	late-noon	0.5	absent	1	0	1	0
2010-12-07	Dec	Summer 2010-11	birds	1	P07	Eskom	Bedford	partly cloudy, cool	moderate	90	86.7	Quail Common	7	uncommon	no sign	grassland	16:15:00	late-noon	0.5	absent	1	0	1	0
2010-12-07	Dec	Summer 2010-11	birds	1	P07	Eskom	Bedford	partly cloudy, cool	moderate	90	86.7	Quail Common	15	uncommon	no sign	grassland	16:15:00	late-noon	0.5	absent	1	0	1	0
2010-12-07	Dec	Summer 2010-11	birds	1	P07	Eskom	Bedford	partly cloudy, cool	moderate	90	86.7	Quailfinch African	1	uncommon	no sign	grassland	16:15:00	late-noon	0.5	absent	1	0	1	0
2010-12-07	Dec	Summer 2010-11	birds	1	P07	Eskom	Bedford	partly cloudy, cool	moderate	90	86.7	Quailfinch African	4	uncommon	no sign	grassland	16:15:00	late-noon	0.5	absent	1	0	1	0
2010-12-07	Dec	Summer 2010-11	birds	1	P07	Eskom	Bedford					Swallow Barn	27	least concern	no sign	aerial feeder	16:15:00	late-noon	0.5	absent	1	0	1	0
2010-12-07	Dec	Summer 2010-11	vegetation	3	P07	Eskom	Bedford					Cisticola Wing-snapping				grassland			0.5
2010-12-07	Dec	Summer 2010-11	vegetation	3	P07	Eskom	Bedford					Cisticola Zitting				grassland			0.5
2010-12-07	Dec	Summer 2010-11	vegetation	3	P07	Eskom	Bedford					Longclaw Cape				grassland			0.5
2010-12-07	Dec	Summer 2010-11	vegetation	3	P07	Eskom	Bedford					Martin Banded				aerial feeder			0.5
2010-12-07	Dec	Summer 2010-11	vegetation	3	P07	Eskom	Bedford					Pipit African				grassland			0.5
2010-12-17	Dec	Summer 2010-11	birds	2	P07	Eskom	Bedford	clear , cool	strong	100	86.7	Bishop Southern-red	15	least concern	no sign	grassland	09:00:00	late morning	0.5	present	1	0	1	0
2010-12-17	Dec	Summer 2010-11	birds	2	P07	Eskom	Bedford	clear , cool	strong	100	86.7	Cisticola Cloud	20	least concern	no sign	grassland	09:00:00	late morning	0.5	present	1	0	1	0
2010-12-17	Dec	Summer 2010-11	birds	2	P07	Eskom	Bedford	clear , cool	strong	100	86.7	Cisticola Wing-snapping	4	least concern	no sign	grassland	09:00:00	late morning	0.5	present	1	1	0	0
2010-12-17	Dec	Summer 2010-11	birds	2	P07	Eskom	Bedford	clear , cool	strong	100	86.7	Cisticola Zitting	4	least concern	no sign	grassland	09:00:00	late morning	0.5	present	1	0	1	0
2010-12-17	Dec	Summer 2010-11	birds	2	P07	Eskom	Bedford	clear , cool	strong	100	86.7	Longclaw Cape	6	rare	no sign	grassland	09:00:00	late morning	0.5	present	1	0	0	1
2010-12-17	Dec	Summer 2010-11	birds	2	P07	Eskom	Bedford	clear , cool	strong	100	86.7	Martin Banded	6	least concern	no sign	aerial feeder	09:00:00	late morning	0.5	present	1	0	1	0
2010-12-17	Dec	Summer 2010-11	birds	2	P07	Eskom	Bedford	clear , cool	strong	100	86.7	Quail Common	30	rare	no sign	grassland	09:00:00	late morning	0.5	present	1	0	1	0
2010-12-17	Dec	Summer 2010-11	birds	2	P07	Eskom	Bedford	clear , cool	strong	100	86.7	Quailfinch African	1	abundant	no sign	grassland	09:00:00	late morning	0.5	absent	1	0	1	0
2010-12-17	Dec	Summer 2010-11	birds	2	P07	Eskom	Bedford	clear , cool	strong	100	86.7	Quailfinch African	4	abundant	no sign	grassland	09:00:00	late morning	0.5	absent	1	0	1	0
2010-12-17	Dec	Summer 2010-11	birds	2	P07	Eskom	Bedford	clear , cool	strong	100	86.7	Quailfinch African	6	abundant	no sign	grassland	09:00:00	late morning	0.5	absent	1	0	1	0
2010-12-17	Dec	Summer 2010-11	birds	2	P07	Eskom	Bedford	clear , cool	strong	100	86.7	Quailfinch African	8	abundant	no sign	grassland	09:00:00	late morning	0.5	absent	1	0	1	0
2010-12-17	Dec	Summer 2010-11	birds	2	P07	Eskom	Bedford	clear , cool	strong	100	86.7	Quailfinch African	9	abundant	no sign	grassland	09:00:00	late morning	0.5	present	1	0	1	0
2010-12-17	Dec	Summer 2010-11	birds	2	P07	Eskom	Bedford	clear , cool	strong	100	86.7	Quailfinch African	11	abundant	no sign	grassland	09:00:00	late morning	0.5	present	1	1	0	0
2010-12-17	Dec	Summer 2010-11	birds	2	P07	Eskom	Bedford	clear , cool	strong	100	86.7	Quailfinch African	17	abundant	no sign	grassland	09:00:00	late morning	0.5	present	1	0	1	0
2010-12-17	Dec	Summer 2010-11	birds	2	P07	Eskom	Bedford	clear , cool	strong	100	86.7	Quailfinch African	25	abundant	no sign	grassland	09:00:00	late morning	0.5	present	1	0	1	0
2010-12-17	Dec	Summer 2010-11	birds	2	P07	Eskom	Bedford	clear , cool	strong	100	86.7	Secretarybird	14	least concern	no sign	grassland	09:00:00	late morning	0.5	present	1	0	1	0
2010-12-17	Dec	Summer 2010-11	birds	2	P07	Eskom	Bedford	clear , cool	strong	100	86.7	Swallow Barn	10	least concern	no sign	aerial feeder	09:00:00	late morning	0.5	present	1	0	0	1
2010-12-17	Dec	Summer 2010-11	birds	2	P07	Eskom	Bedford	clear , cool	strong	100	86.7	Swift African Black	4	least concern	no sign	aerial feeder	09:00:00	late morning	0.5	present	1	0	1	0
2010-12-17	Dec	Summer 2010-11	birds	2	P07	Eskom	Bedford	clear , cool	strong	100	86.7	Vulture Cape	17	least concern	no sign	raptor	09:00:00	late morning	0.5	present	1	0	1	0
2010-12-17	Dec	Summer 2010-11	birds	2	P07	Eskom	Bedford	clear , cool	strong	100	86.7	Widowbird Long-tailed	10	least concern	no sign	grassland	09:00:00	late morning	0.5	present	1	0	1	0
2011-11-21	Nov	Summer 2011-12	vegetation	3	P07	Eskom	Bedford	misty, cool	strong	75	70	Cisticola Cloud				grassland			0.5
2011-11-21	Nov	Summer 2011-12	vegetation	3	P07	Eskom	Bedford	misty, cool	strong	75	70	Cisticola Wing-snapping				grassland			0.5
2011-11-21	Nov	Summer 2011-12	vegetation	3	P07	Eskom	Bedford	misty, cool	strong	75	70	Lark Red-capped				grassland			0.5
2011-11-21	Nov	Summer 2011-12	vegetation	3	P07	Eskom	Bedford	misty, cool	strong	75	70	Longclaw Cape				grassland			0.5
2011-11-21	Nov	Summer 2011-12	vegetation	3	P07	Eskom	Bedford	misty, cool	strong	75	70	Martin Banded				aerial feeder			0.5
2011-11-21	Nov	Summer 2011-12	vegetation	3	P07	Eskom	Bedford	misty, cool	strong	75	70	Pipit African				grassland			0.5
2011-11-21	Nov	Summer 2011-12	vegetation	3	P07	Eskom	Bedford	misty, cool	strong	75	70	Quail Common				grassland			0.5
2011-11-22	Nov	Summer 2011-12	birds	1	P07	Eskom	Bedford	misty, cool	calm	75	83.3	Cisticola Cloud	10	least concern	no sign	grassland	14:30:00	early noon	0.5	absent	1
2011-11-22	Nov	Summer 2011-12	birds	1	P07	Eskom	Bedford	misty, cool	calm	75	83.3	Cisticola Zitting	1	least concern	no sign	grassland	14:30:00	early noon	0.5	absent	1
2011-11-22	Nov	Summer 2011-12	birds	1	P07	Eskom	Bedford	misty, cool	calm	75	83.3	Lark Red-capped	1	common	no sign	grassland	14:30:00	early noon	0.5	absent	1
2011-11-22	Nov	Summer 2011-12	birds	1	P07	Eskom	Bedford	misty, cool	calm	75	83.3	Lark Red-capped	2	common	no sign	grassland	14:30:00	early noon	0.5	absent	1
2011-11-22	Nov	Summer 2011-12	birds	1	P07	Eskom	Bedford	misty, cool	calm	75	83.3	Lark Red-capped	3	common	no sign	grassland	14:30:00	early noon	0.5	absent	1
2011-11-22	Nov	Summer 2011-12	birds	1	P07	Eskom	Bedford	misty, cool	calm	75	83.3	Lark Red-capped	7	common	no sign	grassland	14:30:00	early noon	0.5	absent	1
2011-11-22	Nov	Summer 2011-12	birds	1	P07	Eskom	Bedford	misty, cool	calm	75	83.3	Pipit African	1	uncommon	no sign	grassland	14:30:00	early noon	0.5	absent	1
2011-11-22	Nov	Summer 2011-12	birds	1	P07	Eskom	Bedford	misty, cool	calm	75	83.3	Pipit African	5	uncommon	no sign	grassland	14:30:00	early noon	0.5	absent	1
2011-11-22	Nov	Summer 2011-12	birds	1	P07	Eskom	Bedford	misty, cool	calm	75	83.3	Starling Pied	5	least concern	no sign	grassland	14:30:00	early noon	0.5	absent	1
2011-11-23	Nov	Summer 2011-12	birds	2	P07	Eskom	Bedford	partly cloudy, cool	moderate	90	86.7	Martin Banded	5	least concern	no sign	aerial feeder	08:30:00	mid-morning	0.5	absent	1
2011-11-23	Nov	Summer 2011-12	birds	2	P07	Eskom	Bedford	partly cloudy, cool	moderate	90	86.7	Pipit African	1	rare	no sign	grassland	08:30:00	mid-morning	0.5	absent	1
2011-11-23	Nov	Summer 2011-12	birds	2	P07	Eskom	Bedford	partly cloudy, cool	moderate	90	86.7	Quail Common	11	least concern	no sign	grassland	08:30:00	mid-morning	0.5	present	1
2011-11-23	Nov	Summer 2011-12	birds	2	P07	Eskom	Bedford	partly cloudy, cool	moderate	90	86.7	Quail Common	12	least concern	no sign	grassland	08:30:00	mid-morning	0.5	present	1
2011-11-23	Nov	Summer 2011-12	birds	2	P07	Eskom	Bedford	partly cloudy, cool	moderate	90	86.7	Swallow Barn	3	least concern	no sign	aerial feeder	08:30:00	mid-morning	0.5	present	1
2011-11-23	Nov	Summer 2011-12	birds	2	P07	Eskom	Bedford	partly cloudy, cool	moderate	90	86.7	Swallow Greater-striped	9	least concern	no sign	aerial feeder	08:30:00	mid-morning	0.5	present	1
2011-11-23	Nov	Summer 2011-12	birds	2	P07	Eskom	Bedford	partly cloudy, cool	moderate	90	86.7	Bustard Denham's	9	least concern	no sign	grassland	08:30:00	mid-morning	0.5	absent	1
2011-11-23	Nov	Summer 2011-12	birds	2	P07	Eskom	Bedford	partly cloudy, cool	moderate	90	86.7	Cisticola Cloud	12	least concern	no sign	grassland	08:30:00	mid-morning	0.5	absent	1
2011-11-23	Nov	Summer 2011-12	birds	2	P07	Eskom	Bedford	partly cloudy, cool	moderate	90	86.7	Cisticola Wing-snapping	11	least concern	no sign	grassland	08:30:00	mid-morning	0.5	absent	1
2011-11-23	Nov	Summer 2011-12	birds	2	P07	Eskom	Bedford	partly cloudy, cool	moderate	90	86.7	Crane Blue	12	least concern	no sign	grassland	08:30:00	mid-morning	0.5	absent	1
2011-11-23	Nov	Summer 2011-12	birds	2	P07	Eskom	Bedford	partly cloudy, cool	moderate	90	86.7	Lark Red-capped	5	uncommon	no sign	grassland	08:30:00	mid-morning	0.5	absent	1
2011-11-23	Nov	Summer 2011-12	birds	2	P07	Eskom	Bedford	partly cloudy, cool	moderate	90	86.7	Lark Red-capped	11	uncommon	no sign	grassland	08:30:00	mid-morning	0.5	absent	1
2011-11-23	Nov	Summer 2011-12	birds	2	P07	Eskom	Bedford	partly cloudy, cool	moderate	90	86.7	Lark Red-capped	13	uncommon	no sign	grassland	08:30:00	mid-morning	0.5	absent	1
2011-11-23	Nov	Summer 2011-12	birds	2	P07	Eskom	Bedford	partly cloudy, cool	moderate	90	86.7	Longclaw Cape	8	uncommon	no sign	grassland	08:30:00	mid-morning	0.5	absent	1
2011-11-23	Nov	Summer 2011-12	birds	2	P07	Eskom	Bedford	partly cloudy, cool	moderate	90	86.7	Longclaw Cape	13	uncommon	no sign	grassland	08:30:00	mid-morning	0.5	absent	1
2011-12-19	Dec	Summer 2011-12	birds	1	P07	Eskom	Bedford	clear, hot	strong	80	73.3	Cisticola Cloud	13	abundant	no sign	grassland	14:30:00	mid-morning	0.5	absent	1
2011-12-19	Dec	Summer 2011-12	birds	1	P07	Eskom	Bedford	clear, hot	strong	80	73.3	Cisticola Wing-snapping	2	least concern	no sign	grassland	14:30:00	mid-morning	0.5	present	1
2011-12-19	Dec	Summer 2011-12	birds	1	P07	Eskom	Bedford	clear, hot	strong	80	73.3	Cisticola Zitting	3	least concern	no sign	grassland	14:30:00	mid-morning	0.5	present	1
2011-12-19	Dec	Summer 2011-12	birds	1	P07	Eskom	Bedford	clear, hot	strong	80	73.3	Crow Cape	7	least concern	no sign	grassland	14:30:00	mid-morning	0.5	absent	1
2011-12-19	Dec	Summer 2011-12	birds	1	P07	Eskom	Bedford	clear, hot	strong	80	73.3	Korhaan White-bellied	7	least concern	no sign	grassland	14:30:00	mid-morning	0.5	absent	1
2011-12-19	Dec	Summer 2011-12	birds	1	P07	Eskom	Bedford	clear, hot	strong	80	73.3	Longclaw Cape	1	least concern	no sign	grassland	14:30:00	mid-morning	0.5	present	1
2011-12-19	Dec	Summer 2011-12	birds	1	P07	Eskom	Bedford	clear, hot	strong	80	73.3	Martin Banded	13	least concern	no sign	aerial feeder	14:30:00	mid-morning	0.5	absent	1
2011-12-19	Dec	Summer 2011-12	birds	1	P07	Eskom	Bedford	clear, hot	strong	80	73.3	Pipit African	15	abundant	no sign	grassland	14:30:00	mid-morning	0.5	absent	1
2011-12-19	Dec	Summer 2011-12	birds	1	P07	Eskom	Bedford	clear, hot	strong	80	73.3	Pipit African	16	abundant	no sign	grassland	14:30:00	mid-morning	0.5	absent	1
2011-12-19	Dec	Summer 2011-12	birds	1	P07	Eskom	Bedford	clear, hot	strong	80	73.3	Pipit African	21	abundant	no sign	grassland	14:30:00	mid-morning	0.5	absent	1
2011-12-19	Dec	Summer 2011-12	birds	1	P07	Eskom	Bedford	clear, hot	strong	80	73.3	Quail Common	14	abundant	no sign	grassland	14:30:00	mid-morning	0.5	absent	1
2011-12-19	Dec	Summer 2011-12	birds	1	P07	Eskom	Bedford	clear, hot	strong	80	73.3	swallow Greater-striped	12	rare	no sign	grassland	14:30:00	mid-morning	0.5	absent	1
2011-12-20	Dec	Summer 2011-12	birds	2	P07	Eskom	Bedford	partly cloudy, hot	moderate	70	73.3	Cisticola Cloud	9	least concern	no sign	grassland	08:00:00	mid-morning	0.5	present	1
2011-12-20	Dec	Summer 2011-12	birds	2	P07	Eskom	Bedford	partly cloudy, hot	moderate	70	73.3	Cisticola Wing-snapping	1	least concern	no sign	grassland	08:00:00	mid-morning	0.5	present	1
2011-12-20	Dec	Summer 2011-12	birds	2	P07	Eskom	Bedford	partly cloudy, hot	moderate	70	73.3	Cisticola Zitting	4	least concern	no sign	grassland	08:00:00	mid-morning	0.5	present	1
2011-12-20	Dec	Summer 2011-12	birds	2	P07	Eskom	Bedford	partly cloudy, hot	moderate	70	73.3	Crow Cape	10	least concern	no sign	grassland	08:00:00	mid-morning	0.5	absent	1
2011-12-20	Dec	Summer 2011-12	birds	2	P07	Eskom	Bedford	partly cloudy, hot	moderate	70	73.3	Korhaan White-bellied	27	rare	no sign	grassland	08:00:00	mid-morning	0.5	absent
2011-12-20	Dec	Summer 2011-12	birds	2	P07	Eskom	Bedford	partly cloudy, hot	moderate	70	73.3	Longclaw Cape	12	rare	no sign	grassland	08:00:00	mid-morning	0.5	absent	1
2011-12-20	Dec	Summer 2011-12	birds	2	P07	Eskom	Bedford	partly cloudy, hot	moderate	70	73.3	Martin Banded	7	least concern	no sign	aerial feeder	08:00:00	mid-morning	0.5	absent	1
2011-12-20	Dec	Summer 2011-12	birds	2	P07	Eskom	Bedford	partly cloudy, hot	moderate	70	73.3	Pipit African	1	abundant	no sign	grassland	08:00:00	mid-morning	0.5	absent	1
2011-12-20	Dec	Summer 2011-12	birds	2	P07	Eskom	Bedford	partly cloudy, hot	moderate	70	73.3	Pipit African	3	abundant	no sign	grassland	08:00:00	mid-morning	0.5	absent	1
2011-12-20	Dec	Summer 2011-12	birds	2	P07	Eskom	Bedford	partly cloudy, hot	moderate	70	73.3	Pipit African	4	abundant	no sign	grassland	08:00:00	mid-morning	0.5	absent	1
2011-12-20	Dec	Summer 2011-12	birds	2	P07	Eskom	Bedford	partly cloudy, hot	moderate	70	73.3	Pipit African	9	abundant	no sign	grassland	08:00:00	mid-morning	0.5	absent	1
2011-12-20	Dec	Summer 2011-12	birds	2	P07	Eskom	Bedford	partly cloudy, hot	moderate	70	73.3	Pipit African	21	abundant	no sign	grassland	08:00:00	mid-morning	0.5	absent	1
2011-12-20	Dec	Summer 2011-12	birds	2	P07	Eskom	Bedford	partly cloudy, hot	moderate	70	73.3	Pipit African	22	abundant	no sign	grassland	08:00:00	mid-morning	0.5	absent	1
2011-12-20	Dec	Summer 2011-12	birds	2	P07	Eskom	Bedford	partly cloudy, hot	moderate	70	73.3	Quail Common	21	common	no sign	grassland	08:00:00	mid-morning	0.5	absent	1
2011-12-20	Dec	Summer 2011-12	birds	2	P07	Eskom	Bedford	partly cloudy, hot	moderate	70	73.3	Quail Common	8	common	no sign	grassland	08:00:00	mid-morning	0.5	absent
2011-12-20	Dec	Summer 2011-12	birds	2	P07	Eskom	Bedford	partly cloudy, hot	moderate	70	73.3	Quail Common	10	common	no sign	grassland	08:00:00	mid-morning	0.5	absent
2011-12-20	Dec	Summer 2011-12	birds	2	P07	Eskom	Bedford	partly cloudy, hot	moderate	70	73.3	Quail Common	17	common	no sign	grassland	08:00:00	mid-morning	0.5	absent
2011-12-20	Dec	Summer 2011-12	birds	2	P07	Eskom	Bedford	partly cloudy, hot	moderate	70	73.3	Quailfinch African	6	least concern	no sign	grassland	08:00:00	mid-morning	0.5	absent	1
2011-12-20	Dec	Summer 2011-12	birds	2	P07	Eskom	Bedford	partly cloudy, hot	moderate	70	73.3	Swallow Barn	8	least concern	no sign	aerial feeder	08:00:00	mid-morning	0.5	absent	1
2011-12-20	Dec	Summer 2011-12	birds	2	P07	Eskom	Bedford	partly cloudy, hot	moderate	70	73.3	Widowbird Long-tailed	22	least concern	no sign	grassland	08:00:00	mid-morning	0.5	absent	1
2011-12-20	Dec	Summer 2011-12	vegetation	3	P07	Eskom	Bedford	partly cloudy, cold	moderate	65	70	Chat Ant-eating				grassland			0.5
2011-12-20	Dec	Summer 2011-12	vegetation	3	P07	Eskom	Bedford	partly cloudy, cold	moderate	65	70	Cisticola Wing-snapping				grassland			0.5
2011-12-20	Dec	Summer 2011-12	vegetation	3	P07	Eskom	Bedford	partly cloudy, cold	moderate	65	70	Korhaan White-bellied				grassland
2011-12-20	Dec	Summer 2011-12	vegetation	3	P07	Eskom	Bedford	partly cloudy, cold	moderate	65	70	Lark Red-capped				grassland			0.5
2011-12-20	Dec	Summer 2011-12	vegetation	3	P07	Eskom	Bedford	partly cloudy, cold	moderate	65	70	Martin Banded				aerial feeder			0.5
2011-12-20	Dec	Summer 2011-12	vegetation	3	P07	Eskom	Bedford	partly cloudy, cold	moderate	65	70	Quail Common				grassland			0.5
2011-12-20	Dec	Summer 2011-12	vegetation	3	P07	Eskom	Bedford	partly cloudy, cold	moderate	65	70	Stork White				grassland			0.5
2012-01-11	Jan	Summer 2011-12	birds	1	P07	Eskom	Bedford	clear , cool	moderate	100	93.3	Cisticola Cloud	12	least concern	no sign	grassland	08:00:00	mid-morning	0.5	present	1
2012-01-11	Jan	Summer 2011-12	birds	1	P07	Eskom	Bedford	clear , cool	moderate	100	93.3	Cisticola Wing-snapping	9	least concern	no sign	grassland	08:00:00	mid-morning	0.5	present	1
2012-01-11	Jan	Summer 2011-12	birds	1	P07	Eskom	Bedford	clear , cool	moderate	100	93.3	Cisticola Zitting	5	least concern	no sign	grassland	08:00:00	mid-morning	0.5	present	1
2012-01-11	Jan	Summer 2011-12	birds	1	P07	Eskom	Bedford	clear , cool	moderate	100	93.3	Falcon Amur	2	uncommon	no sign	grassland raptor	08:00:00	mid-morning	0.5	present	1
2012-01-11	Jan	Summer 2011-12	birds	1	P07	Eskom	Bedford	clear , cool	moderate	100	93.3	Falcon Amur	23	uncommon	no sign	grassland raptor	08:00:00	mid-morning	0.5	present	1
2012-01-11	Jan	Summer 2011-12	birds	1	P07	Eskom	Bedford	clear , cool	moderate	100	93.3	Lark Red-capped	4	uncommon	no sign	grassland	08:00:00	mid-morning	0.5	present	1
2012-01-11	Jan	Summer 2011-12	birds	1	P07	Eskom	Bedford	clear , cool	moderate	100	93.3	Longclaw Cape	10	common	no sign	grassland	08:00:00	mid-morning	0.5	present	1
2012-01-11	Jan	Summer 2011-12	birds	1	P07	Eskom	Bedford	clear , cool	moderate	100	93.3	Longclaw Cape	15	common	no sign	grassland	08:00:00	mid-morning	0.5	present	1
2012-01-11	Jan	Summer 2011-12	birds	1	P07	Eskom	Bedford	clear , cool	moderate	100	93.3	Longclaw Cape	19	common	no sign	grassland	08:00:00	mid-morning	0.5	present	1
2012-01-11	Jan	Summer 2011-12	birds	1	P07	Eskom	Bedford	clear , cool	moderate	100	93.3	Martin Banded	14	least concern	no sign	aerial feeder	08:00:00	mid-morning	0.5	present	1
2012-01-11	Jan	Summer 2011-12	birds	1	P07	Eskom	Bedford	clear , cool	moderate	100	93.3	Pipit African	1	abundant	no sign	grassland	08:00:00	mid-morning	0.5	present	1
2012-01-11	Jan	Summer 2011-12	birds	1	P07	Eskom	Bedford	clear , cool	moderate	100	93.3	Pipit African	2	abundant	no sign	grassland	08:00:00	mid-morning	0.5	present	1
2012-01-11	Jan	Summer 2011-12	birds	1	P07	Eskom	Bedford	clear , cool	moderate	100	93.3	Pipit African	4	abundant	no sign	grassland	08:00:00	mid-morning	0.5	present	1
2012-01-11	Jan	Summer 2011-12	birds	1	P07	Eskom	Bedford	clear , cool	moderate	100	93.3	Pipit African	7	abundant	no sign	grassland	08:00:00	mid-morning	0.5	present	1
2012-01-11	Jan	Summer 2011-12	birds	1	P07	Eskom	Bedford	clear , cool	moderate	100	93.3	Pipit African	22	abundant	no sign	grassland	08:00:00	mid-morning	0.5	present	1
2012-01-11	Jan	Summer 2011-12	birds	1	P07	Eskom	Bedford	clear , cool	moderate	100	93.3	Quailfinch African	3	abundant	no sign	grassland	08:00:00	mid-morning	0.5	present	1
2012-01-11	Jan	Summer 2011-12	birds	1	P07	Eskom	Bedford	clear , cool	moderate	100	93.3	Quailfinch African	4	abundant	no sign	grassland	08:00:00	mid-morning	0.5	present	1
2012-01-11	Jan	Summer 2011-12	birds	1	P07	Eskom	Bedford	clear , cool	moderate	100	93.3	Quailfinch African	23	abundant	no sign	grassland	08:00:00	mid-morning	0.5	present	1
2012-01-11	Jan	Summer 2011-12	birds	1	P07	Eskom	Bedford	clear , cool	moderate	100	93.3	Quailfinch African	24	abundant	no sign	grassland	08:00:00	mid-morning	0.5	present	1
2012-01-11	Jan	Summer 2011-12	birds	1	P07	Eskom	Bedford	clear , cool	moderate	100	93.3	Quailfinch African	25	abundant	no sign	grassland	08:00:00	mid-morning	0.5	present	1
2012-01-11	Jan	Summer 2011-12	birds	1	P07	Eskom	Bedford	clear , cool	moderate	100	93.3	Stork White	13	least concern	no sign	grassland	08:00:00	mid-morning	0.5	present	1
2012-01-11	Jan	Summer 2011-12	vegetation	3	P07	Eskom	Bedford	clear, hot	calm	80	86.7	Cisticola Cloud				grassland			0.5
2012-01-11	Jan	Summer 2011-12	vegetation	3	P07	Eskom	Bedford	clear, hot	calm	80	86.7	Cisticola Wing-snapping				grassland			0.5
2012-01-11	Jan	Summer 2011-12	vegetation	3	P07	Eskom	Bedford	clear, hot	calm	80	86.7	Cisticola Zitting				grassland			0.5
2012-01-11	Jan	Summer 2011-12	vegetation	3	P07	Eskom	Bedford	clear, hot	calm	80	86.7	Lark Red-capped				grassland			0.5
2012-01-11	Jan	Summer 2011-12	vegetation	3	P07	Eskom	Bedford	clear, hot	calm	80	86.7	Martin Banded				aerial feeder			0.5
2012-01-11	Jan	Summer 2011-12	vegetation	3	P07	Eskom	Bedford	clear, hot	calm	80	86.7	Pipit African				grassland			0.5
2012-01-11	Jan	Summer 2011-12	vegetation	3	P07	Eskom	Bedford	clear, hot	calm	80	86.7	Quailfinch African				grassland			0.5
2012-01-12	Jan	Summer 2011-12	birds	2	P07	Eskom	Chatworth	clear , hot	moderate	100	93.3	Cisticola Wing-snapping	11	least concern	no sign	grassland	14:30:00	mid-noon	0.5	present
2012-01-12	Jan	Summer 2011-12	birds	2	P07	Eskom	Chatworth	clear , hot	moderate	100	93.3	Cisticola Zitting	15	rare	no sign	grassland	14:30:00	mid-noon	0.5	present
2012-01-12	Jan	Summer 2011-12	birds	2	P07	Eskom	Chatworth	clear , hot	moderate	100	93.3	Falcon Amur	7	common	no sign	grassland	14:30:00	mid-noon	0.5	present
2012-01-12	Jan	Summer 2011-12	birds	2	P07	Eskom	Chatworth	clear , hot	moderate	100	93.3	Falcon Amur	11	common	no sign	grassland	14:30:00	mid-noon	0.5	present
2012-01-12	Jan	Summer 2011-12	birds	2	P07	Eskom	Chatworth	clear , hot	moderate	100	93.3	Falcon Amur	17	common	no sign	grassland	14:30:00	mid-noon	0.5	present
2012-01-12	Jan	Summer 2011-12	birds	2	P07	Eskom	Chatworth	clear , hot	moderate	100	93.3	Falcon Amur	21	common	no sign	grassland	14:30:00	mid-noon	0.5	present
2012-01-12	Jan	Summer 2011-12	birds	2	P07	Eskom	Chatworth	clear , hot	moderate	100	93.3	Korhaan White-bellied	18	rare	no sign	grassland	14:30:00	mid-noon	0.5	present
2012-01-12	Jan	Summer 2011-12	birds	2	P07	Eskom	Chatworth	clear , hot	moderate	100	93.3	Lark Red-capped	11	least concern	no sign	grassland	14:30:00	mid-noon	0.5	present
2012-01-12	Jan	Summer 2011-12	birds	2	P07	Eskom	Chatworth	clear , hot	moderate	100	93.3	Lark Red-capped	12	least concern	no sign	grassland	14:30:00	mid-noon	0.5	present
2012-01-12	Jan	Summer 2011-12	birds	2	P07	Eskom	Chatworth	clear , cool	moderate	100	93.3	Pipit African	1	common	no sign	grassland	14:30:00	mid-noon	0.5	present
2012-01-12	Jan	Summer 2011-12	birds	2	P07	Eskom	Chatworth	clear , hot	moderate	100	93.3	Pipit African	4	common	no sign	grassland	14:30:00	mid-noon	0.5	present
2012-01-12	Jan	Summer 2011-12	birds	2	P07	Eskom	Chatworth	clear , hot	moderate	100	93.3	Pipit African	6	common	no sign	grassland	14:30:00	mid-noon	0.5	present
2012-01-12	Jan	Summer 2011-12	birds	2	P07	Eskom	Chatworth	clear , hot	moderate	100	93.3	Pipit African	11	common	no sign	grassland	14:30:00	mid-noon	0.5	present
2012-01-12	Jan	Summer 2011-12	birds	2	P07	Eskom	Chatworth	clear , hot	moderate	100	93.3	Quailfinch African	5	common	no sign	grassland	14:30:00	mid-noon	0.5	present
2012-01-12	Jan	Summer 2011-12	birds	2	P07	Eskom	Chatworth	clear , hot	moderate	100	93.3	Quailfinch African	7	common	no sign	grassland	14:30:00	mid-noon	0.5	present
2012-01-12	Jan	Summer 2011-12	birds	2	P07	Eskom	Chatworth	clear , hot	moderate	100	93.3	Quailfinch African	10	common	no sign	grassland	14:30:00	mid-noon	0.5	present
2012-01-12	Jan	Summer 2011-12	birds	2	P07	Eskom	Chatworth	clear , hot	moderate	100	93.3	Quailfinch African	15	common	no sign	grassland	14:30:00	mid-noon	0.5	present
2012-01-12	Jan	Summer 2011-12	birds	2	P07	Eskom	Chatworth	clear , hot	moderate	100	93.3	Swallow Greater-striped	12	least concern	no sign	grassland	14:30:00	mid-noon	0.5	present
2012-02-07	Feb	Summer 2011-12	vegetation	3	P07	Eskom	Bedford	clear, hot	calm	80	86.7	Cisticola Cloud				grassland			0.5
2012-02-07	Feb	Summer 2011-12	vegetation	3	P07	Eskom	Bedford	clear, hot	calm	80	86.7	Cisticola Wing-snapping				grassland			0.5
2012-02-07	Feb	Summer 2011-12	vegetation	3	P07	Eskom	Bedford	clear, hot	calm	80	86.7	Cisticola Zitting				grassland			0.5
2012-02-07	Feb	Summer 2011-12	vegetation	3	P07	Eskom	Bedford	clear, hot	calm	80	86.7	Falcon Amur				grassland raptor			0.5
2012-02-07	Feb	Summer 2011-12	vegetation	3	P07	Eskom	Bedford	clear, hot	calm	80	86.7	Lark Red-capped				grassland			0.5
2012-02-07	Feb	Summer 2011-12	vegetation	3	P07	Eskom	Bedford	clear, hot	calm	80	86.7	Longclaw Cape				grassland			0.5
2012-02-07	Feb	Summer 2011-12	vegetation	3	P07	Eskom	Bedford	clear, hot	calm	80	86.7	Martin Banded				aerial feeder			0.5
2012-02-07	Feb	Summer 2011-12	vegetation	3	P07	Eskom	Bedford	clear, hot	calm	80	86.7	Pipit African				grassland			0.5
2012-02-11	Feb	Summer 2011-12	birds	1	P07	Eskom	Bedford	partly cloudy, cool	strong	90	80	Cisticola Wing-snapping	7	least concern	no sign	grassland	08:30:00	mid-morning	0.5	present	1
2012-02-11	Feb	Summer 2011-12	birds	1	P07	Eskom	Bedford	partly cloudy, cool	strong	90	80	Crow Pied	27	least concern	none breeder	scavenger	08:30:00	mid-morning	0.5	present	1
2012-02-11	Feb	Summer 2011-12	birds	1	P07	Eskom	Bedford	partly cloudy, cool	strong	90	80	Falcon Amur	8	uncommon	none breeder	grassland raptor	08:30:00	mid-morning	0.5	present	1
2012-02-11	Feb	Summer 2011-12	birds	1	P07	Eskom	Bedford	partly cloudy, cool	strong	90	80	Falcon Amur	11	uncommon	none breeder	grassland raptor	08:30:00	mid-morning	0.5	present	1
2012-02-11	Feb	Summer 2011-12	birds	1	P07	Eskom	Bedford	partly cloudy, cool	strong	90	80	Falcon Amur	23	uncommon	none breeder	grassland raptor	08:30:00	mid-morning	0.5	present	1
2012-02-11	Feb	Summer 2011-12	birds	1	P07	Eskom	Bedford	partly cloudy, cool	strong	90	80	Lark Red-capped	27	rare	no sign	grassland	08:30:00	mid-morning	0.5	present	1
2012-02-11	Feb	Summer 2011-12	birds	1	P07	Eskom	Bedford	partly cloudy, cool	strong	90	80	Longclaw Cape	8	uncommon	no sign	grassland	08:30:00	mid-morning	0.5	present	1
2012-02-11	Feb	Summer 2011-12	birds	1	P07	Eskom	Bedford	partly cloudy, cool	strong	90	80	Longclaw Cape	21	uncommon	no sign	grassland	08:30:00	mid-morning	0.5	present	1
2012-02-11	Feb	Summer 2011-12	birds	1	P07	Eskom	Bedford	partly cloudy, cool	strong	90	80	Pipit African	1	abundant	breeding	grassland	08:30:00	mid-morning	0.5	present	1
2012-02-11	Feb	Summer 2011-12	birds	1	P07	Eskom	Bedford	partly cloudy, cool	strong	90	80	Pipit African	3	abundant	breeding	grassland	08:30:00	mid-morning	0.5	present	1
2012-02-11	Feb	Summer 2011-12	birds	1	P07	Eskom	Bedford	partly cloudy, cool	strong	90	80	Pipit African	4	abundant	breeding	grassland	08:30:00	mid-morning	0.5	present	1
2012-02-11	Feb	Summer 2011-12	birds	1	P07	Eskom	Bedford	partly cloudy, cool	strong	90	80	Pipit African	7	abundant	breeding	grassland	08:30:00	mid-morning	0.5	present	1
2012-02-11	Feb	Summer 2011-12	birds	1	P07	Eskom	Bedford	partly cloudy, cool	strong	90	80	Pipit African	15	abundant	breeding	grassland	08:30:00	mid-morning	0.5	present	1
2012-02-11	Feb	Summer 2011-12	birds	1	P07	Eskom	Bedford	partly cloudy, cool	strong	90	80	Pipit African	18	abundant	breeding	grassland	08:30:00	mid-morning	0.5	present	1
2012-02-11	Feb	Summer 2011-12	birds	1	P07	Eskom	Bedford	partly cloudy, cool	strong	90	80	Pipit African	21	abundant	breeding	grassland	08:30:00	mid-morning	0.5	present	1
2012-02-11	Feb	Summer 2011-12	birds	1	P07	Eskom	Bedford	partly cloudy, cool	strong	90	80	Secretarybird	1	least concern	none breeder	grassland	08:30:00	mid-morning	0.5	present	1
2012-02-11	Feb	Summer 2011-12	birds	1	P07	Eskom	Bedford	partly cloudy, cool	strong	90	80	Swallow Barn	24	least concern	none breeder	aerial feeder	08:30:00	mid-morning	0.5	present	1
2012-02-11	Feb	Summer 2011-12	birds	1	P07	Eskom	Bedford	partly cloudy, cool	strong	90	80	Swallow Greater-striped	9	least concern	none breeder	aerial feeder	08:30:00	mid-morning	0.5	present	1
2012-02-11	Feb	Summer 2011-12	birds	1	P07	Eskom	Bedford	partly cloudy, cool	strong	90	80	Widowbird Long-tailed	21	uncommon	no sign	grassland	08:30:00	mid-morning	0.5	present	1
2012-02-11	Feb	Summer 2011-12	birds	1	P07	Eskom	Bedford	partly cloudy, cool	strong	90	80	Widowbird Long-tailed	23	uncommon	no sign	grassland	08:30:00	mid-morning	0.5	present	1
2012-02-13	Feb	Summer 2011-12	birds	2	P07	Eskom	Bedford	clear, hot	calm	80	86.7	Cisticola Cloud	7	least concern	no sign	grassland	16:30:00	late-noon	0.5	present	1
2012-02-13	Feb	Summer 2011-12	birds	2	P07	Eskom	Bedford	clear, hot	calm	80	86.7	Cisticola Levaillant's	18	least concern	no sign	grassland	16:30:00	late-noon	0.5	present	1
2012-02-13	Feb	Summer 2011-12	birds	2	P07	Eskom	Bedford	clear, hot	calm	80	86.7	Cisticola Wing-snapping	1	least concern	no sign	grassland	16:30:00	late-noon	0.5	present	1
2012-02-13	Feb	Summer 2011-12	birds	2	P07	Eskom	Bedford	clear, hot	calm	80	86.7	Crow Cape	25	least concern	none breeder	grassland	16:30:00	late-noon	0.5	present	1
2012-02-13	Feb	Summer 2011-12	birds	2	P07	Eskom	Bedford	clear, hot	calm	80	86.7	Falcon Amur	1	rare	none breeder	grassland raptor	16:30:00	late-noon	0.5	present	1
2012-02-13	Feb	Summer 2011-12	birds	2	P07	Eskom	Bedford	clear, hot	calm	80	86.7	Ibis Southern Bald	28	least concern	no sign	grassland	16:30:00	late-noon	0.5	present	1
2012-02-13	Feb	Summer 2011-12	birds	2	P07	Eskom	Bedford	clear, hot	calm	80	86.7	Lark Red-capped	1	rare	no sign	grassland	16:30:00	late-noon	0.5	present	1
2012-02-13	Feb	Summer 2011-12	birds	2	P07	Eskom	Bedford	clear, hot	calm	80	86.7	Longclaw Cape	5	rare	no sign	grassland	16:30:00	late-noon	0.5	present	1
2012-02-13	Feb	Summer 2011-12	birds	2	P07	Eskom	Bedford	clear, hot	calm	80	86.7	Martin Banded	9	least concern	no sign	aerial feeder	16:30:00	late-noon	0.5	present	1
2012-02-13	Feb	Summer 2011-12	birds	2	P07	Eskom	Bedford	clear, hot	calm	80	86.7	Pipit African	1	abundant	no sign	grassland	16:30:00	late-noon	0.5	present	1
2012-02-13	Feb	Summer 2011-12	birds	2	P07	Eskom	Bedford	clear, hot	calm	80	86.7	Pipit African	5	abundant	no sign	grassland	16:30:00	late-noon	0.5	present	1
2012-02-13	Feb	Summer 2011-12	birds	2	P07	Eskom	Bedford	clear, hot	calm	80	86.7	Pipit African	16	abundant	no sign	grassland	16:30:00	late-noon	0.5	present	1
2012-02-13	Feb	Summer 2011-12	birds	2	P07	Eskom	Bedford	clear, hot	calm	80	86.7	Pipit African	18	abundant	no sign	grassland	16:30:00	late-noon	0.5	present	1
2012-02-13	Feb	Summer 2011-12	birds	2	P07	Eskom	Bedford	clear, hot	calm	80	86.7	Pipit African	21	abundant	no sign	grassland	16:30:00	late-noon	0.5	present	1
2012-02-13	Feb	Summer 2011-12	birds	2	P07	Eskom	Bedford	clear, hot	calm	80	86.7	Pipit African	22	abundant	no sign	grassland	16:30:00	late-noon	0.5	present	1
2012-02-13	Feb	Summer 2011-12	birds	2	P07	Eskom	Bedford	clear, hot	calm	80	86.7	Starling Pied	7	least concern	no sign	grassland	16:30:00	late-noon	0.5	present	1
2012-02-13	Feb	Summer 2011-12	birds	2	P07	Eskom	Bedford	clear, hot	calm	80	86.7	Stork White	6	least concern	none breeder	grassland	16:30:00	late-noon	0.5	present	1
2012-02-13	Feb	Summer 2011-12	birds	2	P07	Eskom	Bedford	clear, hot	calm	80	86.7	Swallow Barn	9	least concern	none breeder	aerial feeder	16:30:00	late-noon	0.5	present	1
2012-02-13	Feb	Summer 2011-12	birds	2	P07	Eskom	Bedford	clear, hot	calm	80	86.7	Swallow Greater-striped	17	least concern	none breeder	aerial feeder	16:30:00	late-noon	0.5	present	1
2012-02-13	Feb	Summer 2011-12	birds	2	P07	Eskom	Bedford	clear, hot	calm	80	86.7	Widowbird Long-tailed	19	uncommon	no sign	grassland	16:30:00	late-noon	0.5	present	1
2012-02-13	Feb	Summer 2011-12	birds	2	P07	Eskom	Bedford	clear, hot	calm	80	86.7	Widowbird Long-tailed	22	uncommon	no sign	grassland	16:30:00	late-noon	0.5	present	1
2010-07-05	July	Winter 2010	birds	1	P07	Eskom	Bedford	clear, cold	strong	75	70	Longclaw Cape	15	uncommon	no sign	grassland	14:00:00	early noon	0.5	present	1	0	1	0
2010-07-05	July	Winter 2010	birds	1	P07	Eskom	Bedford	clear, cold	strong	75	70	Longclaw Cape	20	uncommon	no sign	grassland	14:00:00	early noon	0.5	present	1	0	1	0
2010-07-05	July	Winter 2010	birds	1	P07	Eskom	Bedford	clear, cold	strong	75	70	Widowbird Long-tailed	10	rare	no sign	grassland	14:00:00	early noon	0.5	present	1	0	1	0
2010-07-13	July	Winter 2010	birds	1	P07	Eskom	Bedford	cloudy, cool	moderate	85	83.3	Kite Blackshouldered	6	least concern	no sign	raptor	09:30:00	late morning	0.5	absent	1	1	0	0
2010-07-13	July	Winter 2010	birds	1	P07	Eskom	Bedford	partly cloudy, cool	moderate	90	86.7	Stonechat African	14	least concern	no sign	grassland	09:30:00	late morning	0.5	absent	1	0	1	0
2010-07-13	July	Winter 2010	birds	1	P07	Eskom	Bedford	partly cloudy, cool	moderate	90	86.7	Vulture Cape	5	least concern	no sign	raptor	09:30:00	late morning	0.5	absent	1	0	1	0
2010-07-13	July	Winter 2010	birds	1	P07	Eskom	Bedford	partly cloudy, cool	moderate	90	86.7	Widowbird Long-tailed	2	rare	no sign	grassland	09:30:00	late morning	0.5	absent	1	0	1	0
2010-07-13	July	Winter 2010	birds	2	P07	Eskom	Bedford	cloudy, cool	moderate	85	83.3	Chat Ant-eating	12	least concern	no sign	grassland	09:30:00	late morning	0.5	absent	1	0	1	0
2010-07-13	July	Winter 2010	birds	2	P07	Eskom	Bedford	cloudy, cool	moderate	85	83.3	Crow Pied	10	least concern	no sign	scavenger	09:30:00	late morning	0.5	absent	1	0	1	0
2011-11-12	Nov	Summer 2011-12	birds	1	P10	Private	De Beers Pass	clear, cold	moderate	75	76.7	Cisticola Wing-snapping	20	least concern	no sign	grassland	09:15:00	late morning	0.5	present	1
2011-11-12	Nov	Summer 2011-12	birds	1	P10	Private	De Beers Pass	clear, cold	moderate	75	76.7	Cisticola Zitting	22	least concern	no sign	grassland	09:15:00	late morning	0.5	present	1
2011-11-12	Nov	Summer 2011-12	birds	1	P10	Private	De Beers Pass	clear, cold	moderate	75	76.7	cliff-swallow South African	1	least concern	no sign	aerial feeder	09:15:00	late morning	0.5	present	1
2011-11-12	Nov	Summer 2011-12	birds	1	P10	Private	De Beers Pass	clear, cold	moderate	75	76.7	Ibis Southern Bald	2	least concern	no sign	grassland	09:15:00	late morning	0.5	present	1
2011-11-12	Nov	Summer 2011-12	birds	1	P10	Private	De Beers Pass	clear, cold	moderate	75	76.7	Lark Red-capped	18	rare	no sign	grassland	09:15:00	late morning	0.5	present	1
2011-11-12	Nov	Summer 2011-12	birds	1	P10	Private	De Beers Pass	clear, cold	moderate	75	76.7	Longclaw Cape	16	rare	no sign	grassland	09:15:00	late morning	0.5	present	1
2011-11-12	Nov	Summer 2011-12	birds	1	P10	Private	De Beers Pass	clear, cold	moderate	75	76.7	Pipit African	1	common	no sign	grassland	09:15:00	late morning	0.5	present	1
2011-11-12	Nov	Summer 2011-12	birds	1	P10	Private	De Beers Pass	clear, cold	moderate	75	76.7	Pipit African	2	common	no sign	grassland	09:15:00	late morning	0.5	present	1
2011-11-12	Nov	Summer 2011-12	birds	1	P10	Private	De Beers Pass	clear, cold	moderate	75	76.7	Pipit African	3	common	no sign	grassland	09:15:00	late morning	0.5	present	1
2011-11-12	Nov	Summer 2011-12	birds	1	P10	Private	De Beers Pass	clear, cold	moderate	75	76.7	Pipit African	15	common	no sign	grassland	09:15:00	late morning	0.5	present	1
2011-11-12	Nov	Summer 2011-12	birds	1	P10	Private	De Beers Pass	clear, cold	moderate	75	76.7	Pipit African	20	common	no sign	grassland	09:15:00	late morning	0.5	present	1
2011-11-12	Nov	Summer 2011-12	birds	1	P10	Private	De Beers Pass	clear, cold	moderate	75	76.7	Pipit Yellow-breasted	5	rare	no sign	grassland	09:15:00	late morning	0.5	absent	1
2011-11-12	Nov	Summer 2011-12	birds	1	P10	Private	De Beers Pass	clear, cold	moderate	75	76.7	Swallow Greater-striped	1	least concern	no sign	aerial feeder	09:15:00	late morning	0.5	absent	1
2011-11-16	Nov	Summer 2011-12	vegetation	3	P10	Private	De Beers Pass	clear, cold	moderate	75	76.7	Cisticola Wing-snapping				grassland			0.5
2011-11-16	Nov	Summer 2011-12	vegetation	3	P10	Private	De Beers Pass	clear, cold	moderate	75	76.7	Ibis Southern Bald				grassland
2011-11-16	Nov	Summer 2011-12	vegetation	3	P10	Private	De Beers Pass	clear, cold	moderate	75	76.7	Lark Red-capped				grassland			0.5
2011-11-16	Nov	Summer 2011-12	vegetation	3	P10	Private	De Beers Pass	clear, cold	moderate	75	76.7	Longclaw Cape				grassland			0.5
2011-11-16	Nov	Summer 2011-12	vegetation	3	P10	Private	De Beers Pass	clear, cold	moderate	75	76.7	Pipit African				grassland			0.5
2011-11-16	Nov	Summer 2011-12	vegetation	3	P10	Private	De Beers Pass	clear, cold	moderate	75	76.7	Swallow Greater-striped				aerial feeder			0.5
2011-11-21	Nov	Summer 2011-12	birds	2	P10	Private	De Beers Pass	cloudy, cool	moderate	85	83.3	Cisticola Wing-snapping	4	least concern	no sign	grassland	07:30:00	early morning	0.5	present	1
2011-11-21	Nov	Summer 2011-12	birds	2	P10	Private	De Beers Pass	cloudy, cool	moderate	85	83.3	Crow Cape	3	least concern	no sign	grassland	07:30:00	early morning	0.5	present	1
2011-11-21	Nov	Summer 2011-12	birds	2	P10	Private	De Beers Pass	cloudy, cool	moderate	85	83.3	Ibis Southern Bald	5	least concern	no sign	grassland	07:30:00	early morning	0.5	present	1
2011-11-21	Nov	Summer 2011-12	birds	2	P10	Private	De Beers Pass	cloudy, cool	moderate	85	83.3	Lark Red-capped	10	rare	no sign	grassland	07:30:00	early morning	0.5	present	1
2011-11-21	Nov	Summer 2011-12	birds	2	P10	Private	De Beers Pass	cloudy, cool	moderate	85	83.3	Longclaw Cape	3	uncommon	no sign	grassland	07:30:00	early morning	0.5	present	1
2011-11-21	Nov	Summer 2011-12	birds	2	P10	Private	De Beers Pass	cloudy, cool	moderate	85	83.3	Longclaw Cape	20	uncommon	no sign	grassland	07:30:00	early morning	0.5	present	1
2011-11-21	Nov	Summer 2011-12	birds	2	P10	Private	De Beers Pass	cloudy, cool	moderate	85	83.3	Pipit African	1	uncommon	no sign	grassland	07:30:00	early morning	0.5	present	1
2011-11-21	Nov	Summer 2011-12	birds	2	P10	Private	De Beers Pass	cloudy, cool	moderate	85	83.3	Pipit African	15	uncommon	no sign	grassland	07:30:00	early morning	0.5	present	1
2011-11-21	Nov	Summer 2011-12	birds	2	P10	Private	De Beers Pass	cloudy, cool	moderate	85	83.3	Pipit African	20	uncommon	no sign	grassland	07:30:00	early morning	0.5	present	1
2011-11-21	Nov	Summer 2011-12	birds	2	P10	Private	De Beers Pass	cloudy, cool	moderate	85	83.3	Swift Alpine	18	least concern	no sign	aerial feeder	07:30:00	early morning	0.5	present	1
2011-12-12	Dec	Summer 2011-12	birds	1	P10	Private	De Beers Pass	clear , cool	strong	100	86.7	Cisticola Wing-snapping	16	least concern	no sign	grassland	07:50:00	early morning	0.5	present	1
2011-12-12	Dec	Summer 2011-12	birds	1	P10	Private	De Beers Pass	clear , cool	strong	100	86.7	Cisticola Zitting	5	least concern	no sign	grassland	07:50:00	early morning	0.5	present	1
2011-12-12	Dec	Summer 2011-12	birds	1	P10	Private	De Beers Pass	clear , cool	strong	100	86.7	Crane Grey Crowned	7	least concern	no sign	wetland	07:50:00	early morning	0.5	present	1
2011-12-12	Dec	Summer 2011-12	birds	1	P10	Private	De Beers Pass	clear , cool	strong	100	86.7	Longclaw Cape	3	rare	no sign	grassland	07:50:00	early morning	0.5	absent	1
2011-12-12	Dec	Summer 2011-12	birds	1	P10	Private	De Beers Pass	clear , cool	strong	100	86.7	Martin Banded	1	least concern	no sign	aerial feeder	07:50:00	early morning	0.5	absent	1
2011-12-12	Dec	Summer 2011-12	birds	1	P10	Private	De Beers Pass	clear , cool	strong	100	86.7	Pipit African	10	uncommon	no sign	grassland	07:50:00	early morning	0.5	absent	1
2011-12-12	Dec	Summer 2011-12	birds	1	P10	Private	De Beers Pass	clear , cool	strong	100	86.7	Pipit African	12	uncommon	no sign	grassland	07:50:00	early morning	0.5	absent	1
2011-12-12	Dec	Summer 2011-12	birds	1	P10	Private	De Beers Pass	clear , cool	strong	100	86.7	Pipit African	14	uncommon	no sign	grassland	07:50:00	early morning	0.5	absent	1
2011-12-12	Dec	Summer 2011-12	birds	1	P10	Private	De Beers Pass	clear , cool	strong	100	86.7	Swallow Greater-striped	11	least concern	no sign	aerial feeder	07:50:00	early morning	0.5	present	1
2011-12-12	Dec	Summer 2011-12	vegetation	3	P10	Private	De Beers Pass	clear, hot	strong	80	73.3	Bishop Yellow-crowned				grassland			0.5
2011-12-12	Dec	Summer 2011-12	vegetation	3	P10	Private	De Beers Pass	clear, hot	strong	80	73.3	Cisticola Wing-snapping				grassland			0.5
2011-12-12	Dec	Summer 2011-12	vegetation	3	P10	Private	De Beers Pass	clear, hot	strong	80	73.3	Cisticola Wing-snapping				grassland			0.5
2011-12-12	Dec	Summer 2011-12	vegetation	3	P10	Private	De Beers Pass	clear, hot	strong	80	73.3	Ibis Hadeda				marsh & wetlands			0.5
2011-12-12	Dec	Summer 2011-12	vegetation	3	P10	Private	De Beers Pass	clear, hot	strong	80	73.3	Longclaw Cape				grassland			0.5
2011-12-12	Dec	Summer 2011-12	vegetation	3	P10	Private	De Beers Pass	clear, hot	strong	80	73.3	Pipit African				grassland			0.5
2011-12-12	Dec	Summer 2011-12	vegetation	3	P10	Private	De Beers Pass	clear, hot	strong	80	73.3	Quail Common				grassland			0.5
2011-12-13	Dec	Summer 2011-12	birds	2	P10	Private	De Beers Pass	partly cloudy, warm	calm	75	83.3	Buzzard Steppe	8	least concern	none breeder	raptor	07:15:00	early morning	0.5	absent	1
2011-12-13	Dec	Summer 2011-12	birds	2	P10	Private	De Beers Pass	partly cloudy, warm	calm	75	83.3	Cisticola Wing-snapping	4	least concern	no sign	grassland	07:15:00	early morning	0.5	absent	1
2011-12-13	Dec	Summer 2011-12	birds	2	P10	Private	De Beers Pass	partly cloudy, warm	calm	75	83.3	Cisticola Zitting	1	least concern	breeding	grassland	07:15:00	early morning	0.5	absent	1
2011-12-13	Dec	Summer 2011-12	birds	2	P10	Private	De Beers Pass	partly cloudy, warm	calm	75	83.3	Ibis Southern Bald	23	rare	no sign	grassland	07:15:00	early morning	0.5	present	1
2011-12-13	Dec	Summer 2011-12	birds	2	P10	Private	De Beers Pass	partly cloudy, warm	calm	75	83.3	Lapwing Crowned	9	least concern	no sign	grassland	07:15:00	early morning	0.5	absent	1
2011-12-13	Dec	Summer 2011-12	birds	2	P10	Private	De Beers Pass	partly cloudy, warm	calm	75	83.3	Longclaw Cape	23	rare	no sign	grassland	07:15:00	early morning	0.5	absent	1
2011-12-13	Dec	Summer 2011-12	birds	2	P10	Private	De Beers Pass	partly cloudy, warm	calm	75	83.3	Pipit African	3	uncommon	no sign	grassland	07:15:00	early morning	0.5	absent	1
2011-12-13	Dec	Summer 2011-12	birds	2	P10	Private	De Beers Pass	partly cloudy, warm	calm	75	83.3	Pipit African	15	uncommon	no sign	grassland	07:15:00	early morning	0.5	absent	1
2011-12-13	Dec	Summer 2011-12	birds	2	P10	Private	De Beers Pass	partly cloudy, warm	calm	75	83.3	Pipit African	17	uncommon	no sign	grassland	07:15:00	early morning	0.5	absent	1
2011-12-13	Dec	Summer 2011-12	birds	2	P10	Private	De Beers Pass	partly cloudy, warm	calm	75	83.3	Quailfinch African	3	rare	no sign	grassland	07:15:00	early morning	0.5	absent	1
2011-12-13	Dec	Summer 2011-12	birds	2	P10	Private	De Beers Pass	partly cloudy, warm	calm	75	83.3	Starling Pied	22	least concern	no sign	grassland	07:15:00	early morning	0.5	absent	1
2011-12-13	Dec	Summer 2011-12	birds	2	P10	Private	De Beers Pass	partly cloudy, warm	calm	75	83.3	Swallow Greater-striped	2	least concern	none breeder	aerial feeder	07:15:00	early morning	0.5	absent	1
2011-12-13	Dec	Summer 2011-12	birds	2	P10	Private	De Beers Pass	partly cloudy, warm	calm	75	83.3	Swift Alpine	22	least concern	none breeder	aerial feeder	07:15:00	early morning	0.5	present	1
2012-01-06	Jan	Summer 2011-12	birds	1	P10	Private	De Beers Pass	clear , cool	moderate	100	93.3	Buzzard Jackal	23	least concern	no sign	raptor	07:30:00	early morning	0.5	absent	1
2012-01-06	Jan	Summer 2011-12	birds	1	P10	Private	De Beers Pass	clear , cool	moderate	100	93.3	Buzzard Steppe	24	least concern	no sign	raptor	07:30:00	early morning	0.5	absent	1
2012-01-06	Jan	Summer 2011-12	birds	1	P10	Private	De Beers Pass	clear , cool	moderate	100	93.3	Cisticola Wing-snapping	7	least concern	no sign	grassland	07:30:00	early morning	0.5	absent	1
2012-01-06	Jan	Summer 2011-12	birds	1	P10	Private	De Beers Pass	clear , cool	moderate	100	93.3	Cisticola Zitting	1	least concern	no sign	grassland	07:30:00	early morning	0.5	absent	1
2012-01-06	Jan	Summer 2011-12	birds	1	P10	Private	De Beers Pass	clear , cool	moderate	100	93.3	Falcon Amur	2	uncommon	no sign	grassland raptor	07:30:00	early morning	0.5	absent	1
2012-01-06	Jan	Summer 2011-12	birds	1	P10	Private	De Beers Pass	clear , cool	moderate	100	93.3	Falcon Amur	15	uncommon	no sign	grassland raptor	07:30:00	early morning	0.5	absent	1
2012-01-06	Jan	Summer 2011-12	birds	1	P10	Private	De Beers Pass	clear , cool	moderate	100	93.3	Pipit African	18	uncommon	no sign	grassland	07:30:00	early morning	0.5	present	1
2012-01-06	Jan	Summer 2011-12	birds	1	P10	Private	De Beers Pass	clear , cool	moderate	100	93.3	Pipit African	11	uncommon	no sign	grassland	07:30:00	early morning	0.5	absent	1
2012-01-06	Jan	Summer 2011-12	birds	1	P10	Private	De Beers Pass	clear , cool	moderate	100	93.3	Pipit African	16	uncommon	no sign	grassland	07:30:00	early morning	0.5	absent	1
2012-01-06	Jan	Summer 2011-12	birds	1	P10	Private	De Beers Pass	clear , cool	moderate	100	93.3	Quailfinch African	18	rare	no sign	grassland	07:30:00	early morning	0.5	present	1
2012-01-06	Jan	Summer 2011-12	birds	1	P10	Private	De Beers Pass	clear , cool	moderate	100	93.3	Swallow Barn	3	least concern	no sign	aerial feeder	07:30:00	early morning	0.5	present
2012-01-06	Jan	Summer 2011-12	birds	1	P10	Private	De Beers Pass	clear , cool	moderate	100	93.3	Swallow Greater-striped	12	least concern	no sign	aerial feeder	07:30:00	early morning	0.5	present
2012-01-06	Jan	Summer 2011-12	vegetation	3	P10	Private	De Beers Pass	clear, hot	calm	80	86.7	Cisticola Wing-snapping				grassland			0.5
2012-01-06	Jan	Summer 2011-12	vegetation	3	P10	Private	De Beers Pass	clear, hot	calm	80	86.7	Cisticola Zitting				grassland			0.5
2012-01-06	Jan	Summer 2011-12	vegetation	3	P10	Private	De Beers Pass	clear, hot	calm	80	86.7	Lapwing Black-smith				marsh & wetlands			0.5
2012-01-06	Jan	Summer 2011-12	vegetation	3	P10	Private	De Beers Pass	clear, hot	calm	80	86.7	Longclaw Cape				grassland			0.5
2012-01-06	Jan	Summer 2011-12	vegetation	3	P10	Private	De Beers Pass	clear, hot	calm	80	86.7	Martin Banded				aerial feeder			0.5
2012-01-06	Jan	Summer 2011-12	vegetation	3	P10	Private	De Beers Pass	clear, hot	calm	80	86.7	Pipit African				grassland			0.5
2012-01-06	Jan	Summer 2011-12	vegetation	3	P10	Private	De Beers Pass	clear, hot	calm	80	86.7	Pipit Yellow-breasted				grassland			0.5
2012-01-06	Jan	Summer 2011-12	vegetation	3	P10	Private	De Beers Pass	clear, hot	calm	80	86.7	Quailfinch African				grassland			0.5
2012-01-06	Jan	Summer 2011-12	vegetation	3	P10	Private	De Beers Pass	clear, hot	calm	80	86.7	Swallow Greater-striped				aerial feeder			0.5
2012-01-09	Jan	Summer 2011-12	birds	2	P10	Private	De Beers Pass	clear , cool	moderate	100	93.3	Cisticola Wing-snapping	11	least concern	no sign	grassland	09:50:00	late morning	0.5	absent	1
2012-01-09	Jan	Summer 2011-12	birds	2	P10	Private	De Beers Pass	clear , cool	moderate	100	93.3	Cisticola Zitting	1	least concern	no sign	grassland	09:50:00	late morning	0.5	absent	1
2012-01-09	Jan	Summer 2011-12	birds	2	P10	Private	De Beers Pass	clear , cool	moderate	100	93.3	Falcon Amur	1	common	no sign	grassland raptor	09:50:00	late morning	0.5	absent	1
2012-01-09	Jan	Summer 2011-12	birds	2	P10	Private	De Beers Pass	clear , cool	moderate	100	93.3	Falcon Amur	7	common	no sign	grassland raptor	09:50:00	late morning	0.5	absent	1
2012-01-09	Jan	Summer 2011-12	birds	2	P10	Private	De Beers Pass	clear , cool	moderate	100	93.3	Falcon Amur	8	common	no sign	grassland raptor	09:50:00	late morning	0.5	absent	1
2012-01-09	Jan	Summer 2011-12	birds	2	P10	Private	De Beers Pass	clear , cool	moderate	100	93.3	Falcon Amur	11	common	no sign	grassland raptor	09:50:00	late morning	0.5	absent	1
2012-01-09	Jan	Summer 2011-12	birds	2	P10	Private	De Beers Pass	clear , cool	moderate	100	93.3	Falcon Amur	17	common	no sign	grassland raptor	09:50:00	late morning	0.5	absent	1
2012-01-09	Jan	Summer 2011-12	birds	2	P10	Private	De Beers Pass	clear , cool	moderate	100	93.3	Longclaw Cape	4	uncommon	no sign	grassland	09:50:00	late morning	0.5	absent	1
2012-01-09	Jan	Summer 2011-12	birds	2	P10	Private	De Beers Pass	clear , cool	moderate	100	93.3	Martin Banded	3	least concern	no sign	aerial feeder	09:50:00	late morning	0.5	present	1
2012-01-09	Jan	Summer 2011-12	birds	2	P10	Private	De Beers Pass	clear , cool	moderate	100	93.3	Swallow Greater-striped	1	least concern	no sign	aerial feeder	09:50:00	late morning	0.5	present	1
2012-02-06	Feb	Summer 2011-12	vegetation	3	P10	Private	De Beers Pass	partly cloudy, hot	moderate	70	73.3	Buzzard Jackal				raptor			0.5
2012-02-06	Feb	Summer 2011-12	vegetation	3	P10	Private	De Beers Pass	partly cloudy, hot	moderate	70	73.3	Buzzard Steppe				raptor			0.5
2012-02-06	Feb	Summer 2011-12	vegetation	3	P10	Private	De Beers Pass	partly cloudy, hot	moderate	70	73.3	Cisticola Wing-snapping				grassland			0.5
2012-02-06	Feb	Summer 2011-12	vegetation	3	P10	Private	De Beers Pass	partly cloudy, hot	moderate	70	73.3	Cisticola Zitting				grassland			0.5
2012-02-06	Feb	Summer 2011-12	vegetation	3	P10	Private	De Beers Pass	partly cloudy, hot	moderate	70	73.3	Francolin Red-winged				grassland			0.5
2012-02-06	Feb	Summer 2011-12	vegetation	3	P10	Private	De Beers Pass	partly cloudy, hot	moderate	70	73.3	Martin Banded				aerial feeder			0.5
2012-02-06	Feb	Summer 2011-12	vegetation	3	P10	Private	De Beers Pass	partly cloudy, hot	moderate	70	73.3	Wagtail Cape				raptor			0.5
2012-02-07	Feb	Summer 2011-12	birds	1	P10	Private	De Beers Pass	cloudy, cool	moderate	85	83.3	Cisticola Wing-snapping	5	least concern	no sign	grassland	07:30:00	early morning	0.5	absent
2012-02-07	Feb	Summer 2011-12	birds	1	P10	Private	De Beers Pass	cloudy, cool	moderate	85	83.3	Cisticola Zitting	7	least concern	no sign	grassland	07:30:00	early morning	0.5	absent
2012-02-07	Feb	Summer 2011-12	birds	1	P10	Private	De Beers Pass	cloudy, cool	moderate	85	83.3	cliff-swallow South African	8	least concern	none breeder	aerial feeder	07:30:00	early morning	0.5	absent
2012-02-07	Feb	Summer 2011-12	birds	1	P10	Private	De Beers Pass	cloudy, cool	moderate	85	83.3	Swallow Barn	7	least concern	none breeder	aerial feeder	07:30:00	early morning	0.5	absent
2012-02-07	Feb	Summer 2011-12	birds	1	P10	Private	De Beers Pass	cloudy, cool	moderate	85	83.3	Swallow Greater-striped	3	least concern	none breeder	aerial feeder	07:30:00	early morning	0.5	absent
2012-02-09	Feb	Summer 2011-12	birds	2	P10	Private	De Beers Pass	partly cloudy, cool	moderate	90	86.7	Cisticola Wing-snapping	7	least concern	no sign	grassland	08:14:00	mid-morning	0.5	absent
2012-02-09	Feb	Summer 2011-12	birds	2	P10	Private	De Beers Pass	partly cloudy, cool	moderate	90	86.7	Cisticola Zitting	1	least concern	no sign	grassland	08:14:00	mid-morning	0.5	absent
2012-02-09	Feb	Summer 2011-12	birds	2	P10	Private	De Beers Pass	partly cloudy, cool	moderate	90	86.7	cliff-swallow South African	1	least concern	none breeder	aerial feeder	08:14:00	mid-morning	0.5	absent
2012-02-09	Feb	Summer 2011-12	birds	2	P10	Private	De Beers Pass	partly cloudy, cool	moderate	90	86.7	Swallow Barn	1	least concern	none breeder	aerial feeder	08:14:00	mid-morning	0.5	absent
2011-03-07	March	Autumn 2011	birds	1	P22	Eskom	Chatworth	partly cloudy, cool	moderate	90	86.7	Cisticola Wing-snapping	1	least concern	no sign	grassland	09:30:00	late morning	0.5	absent	1	1	0	0
2011-03-07	March	Autumn 2011	birds	1	P22	Eskom	Chatworth	partly cloudy, cool	moderate	90	86.7	Falcon Amur	1	rare	no sign	grassland raptor	09:30:00	late morning	0.5	absent	1	1	0	0
2011-03-07	March	Autumn 2011	birds	1	P22	Eskom	Chatworth	partly cloudy, cool	moderate	90	86.7	Longclaw Cape	8	uncommon	no sign	grassland	09:30:00	late morning	0.5	present	1	0	1	0
2011-03-07	March	Autumn 2011	birds	1	P22	Eskom	Chatworth	partly cloudy, cool	moderate	90	86.7	Longclaw Cape	21	uncommon	no sign	grassland	09:30:00	late morning	0.5	present	1	0	1	0
2011-03-07	March	Autumn 2011	birds	1	P22	Eskom	Chatworth	partly cloudy, cool	moderate	90	86.7	Longclaw Cape	24	uncommon	no sign	grassland	09:30:00	late morning	0.5	present	1	1	0	0
2011-03-07	March	Autumn 2011	birds	1	P22	Eskom	Chatworth	partly cloudy, cool	moderate	90	86.7	Martin Banded	1	least concern	no sign	aerial feeder	09:30:00	late morning	0.5	present	1	1	0	0
2011-03-07	March	Autumn 2011	birds	1	P22	Eskom	Chatworth	partly cloudy, cool	moderate	90	86.7	Pipit Yellow-breasted	24	rare	no sign	grassland	09:30:00	late morning	0.5	present	1	0	1	0
2011-03-07	March	Autumn 2011	birds	1	P22	Eskom	Chatworth	partly cloudy, cool	moderate	90	86.7	Sunbird Malachite	25	least concern	no sign	scrub & forest	09:30:00	late morning	0.5	present	1	0	0	1
2011-03-07	March	Autumn 2011	birds	1	P22	Eskom	Chatworth	partly cloudy, cool	moderate	90	86.7	Swallow Barn	7	least concern	no sign	aerial feeder	09:30:00	late morning	0.5	present	1	0	1	0
2011-03-07	March	Autumn 2011	birds	1	P22	Eskom	Chatworth	partly cloudy, cool	moderate	90	86.7	Wheater Mountain	24	least concern	no sign	grassland	09:30:00	late morning	0.5	present	1	0	1	0
2011-03-07	March	Autumn 2011	birds	1	P22	Eskom	Chatworth	partly cloudy, cool	moderate	90	86.7	Widowbird Long-tailed	14	rare	no sign	grassland	09:30:00	late morning	0.5	present	1	0	1	0
2011-03-15	March	Autumn 2011	birds	2	P22	Eskom	Chatworth	cloudy, cool	moderate	85	83.3	Dove Cape-turtle	18	least concern	no sign	forest	08:40:00	mid-morning	0.5	absent	1	0	1	0
2011-03-15	March	Autumn 2011	birds	2	P22	Eskom	Chatworth	cloudy, cool	moderate	85	83.3	Longclaw Cape	14	uncommon	no sign	grassland	08:40:00	mid-morning	0.5	present	1	0	1	0
2011-03-15	March	Autumn 2011	birds	2	P22	Eskom	Chatworth	cloudy, cool	moderate	85	83.3	Longclaw Cape	21	uncommon	no sign	grassland	08:40:00	mid-morning	0.5	present	1	0	0	1
2011-03-15	March	Autumn 2011	birds	2	P22	Eskom	Chatworth	cloudy, cool	moderate	85	83.3	Martin Banded	1	least concern	no sign	aerial feeder	08:40:00	mid-morning	0.5	present	1	1	0	0
2011-03-15	March	Autumn 2011	birds	2	P22	Eskom	Chatworth	partly cloudy, cool	moderate	90	86.7	Starling Pied	24	least concern	no sign	grassland	08:40:00	mid-morning	0.5	absent	1	0	1	0
2011-03-15	March	Autumn 2011	birds	2	P22	Eskom	Chatworth	partly cloudy, cool	moderate	90	86.7	Sunbird Malachite	24	least concern	no sign	scrub & forest	08:40:00	mid-morning	0.5	absent	1	0	1	0
2011-03-15	March	Autumn 2011	birds	2	P22	Eskom	Chatworth	partly cloudy, cool	moderate	90	86.7	Swallow Greater-striped	18	least concern	no sign	aerial feeder	08:40:00	mid-morning	0.5	absent	1	1	0	0
2010-10-19	October	Spring 2010	birds	1	P22	Eskom	Chatworth	partly cloudy, cold	strong	65	63.3	Chat Ant-eating	20	least concern	no sign	grassland	08:10:00	mid-morning	0.5	absent	1	0	1	0
2010-10-19	October	Spring 2010	birds	1	P22	Eskom	Chatworth	partly cloudy, cold	strong	65	63.3	Ibis Hadeda	18	least concern	no sign	marsh & wetlands	08:10:00	mid-morning	0.5	absent	1	1	0	0
2010-10-19	October	Spring 2010	birds	1	P22	Eskom	Chatworth	partly cloudy, cold	strong	65	63.3	Ibis Southern Bald	8	least concern	no sign	grassland	08:10:00	mid-morning	0.5	absent	1	1	0	0
2010-10-19	October	Spring 2010	birds	1	P22	Eskom	Chatworth	partly cloudy, cold	strong	65	63.3	Lark Eastern Long-billed	1	least concern	no sign	grassland	08:10:00	mid-morning	0.5	absent	1	0	0	1
2010-10-19	October	Spring 2010	birds	1	P22	Eskom	Chatworth	partly cloudy, cold	strong	65	63.3	Lark Eastern Long-billed	10	least concern	no sign	grassland	08:10:00	mid-morning	0.5	absent	1	0	1	0
2010-10-19	October	Spring 2010	birds	1	P22	Eskom	Chatworth	partly cloudy, cold	strong	65	63.3	Lark Red-capped	4	uncommon	no sign	grassland	08:10:00	mid-morning	0.5	absent	1	0	1	0
2010-10-19	October	Spring 2010	birds	1	P22	Eskom	Chatworth	partly cloudy, cold	strong	65	63.3	Lark Red-capped	10	uncommon	no sign	grassland	08:10:00	mid-morning	0.5	absent	1	0	1	0
2010-10-19	October	Spring 2010	birds	1	P22	Eskom	Chatworth	partly cloudy, cool	moderate	90	86.7	Longclaw Cape	10	rare	no sign	grassland	08:10:00	mid-morning	0.5	present	1	0	0	1
2010-10-19	October	Spring 2010	birds	1	P22	Eskom	Chatworth	partly cloudy, cool	moderate	90	86.7	Pipit African	1	uncommon	no sign	grassland	08:10:00	mid-morning	0.5	present	1	0	0	1
2010-10-19	October	Spring 2010	birds	1	P22	Eskom	Chatworth	partly cloudy, cool	moderate	90	86.7	Pipit African	16	uncommon	no sign	grassland	08:10:00	mid-morning	0.5	present	1	0	1	0
2010-10-19	October	Spring 2010	birds	1	P22	Eskom	Chatworth	partly cloudy, cool	moderate	90	86.7	Pipit Yellow-breasted	20	uncommon	no sign	grassland	08:10:00	mid-morning	0.5	present	1	0	1	0
2010-10-19	October	Spring 2010	birds	1	P22	Eskom	Chatworth	partly cloudy, cool	moderate	90	86.7	Starling Pied	8	least concern	no sign	grassland	08:10:00	mid-morning	0.5	present	1	0	1	0
2010-10-25	October	Spring 2010	birds	2	P22	Eskom	Chatworth	clear , cool	strong	100	86.7	Crow Cape	23	least concern	no sign	grassland	09:40:00	late morning	0.5	absent	1	0	1	0
2010-10-25	October	Spring 2010	birds	2	P22	Eskom	Chatworth	clear , cool	strong	100	86.7	Lark Eastern Long-billed	13	least concern	no sign	grassland	09:40:00	late morning	0.5	absent	1	0	1	0
2010-10-25	October	Spring 2010	birds	2	P22	Eskom	Chatworth	clear , cool	strong	100	86.7	Lark Red-capped	2	uncommon	no sign	grassland	09:40:00	late morning	0.5	absent	1	1	0	0
2010-10-25	October	Spring 2010	birds	2	P22	Eskom	Chatworth	clear , cool	strong	100	86.7	Lark Red-capped	3	uncommon	no sign	grassland	09:40:00	late morning	0.5	absent	1	0	1	0
2010-10-25	October	Spring 2010	birds	2	P22	Eskom	Chatworth	clear , cool	strong	100	86.7	Lark Red-capped	12	uncommon	no sign	grassland	09:40:00	late morning	0.5	absent	1	0	1	0
2010-10-25	October	Spring 2010	birds	2	P22	Eskom	Chatworth	clear , cool	strong	100	86.7	Longclaw Cape	19	rare	no sign	grassland	09:40:00	late morning	0.5	absent	1	0	0	1
2010-10-25	October	Spring 2010	birds	2	P22	Eskom	Chatworth	clear, cold	strong	75	70	Pipit Yellow-breasted	25	rare	no sign	grassland	09:40:00	late morning	0.5	absent	1	0	1	0
2010-12-08	Dec	Summer 2010-11	birds	1	P22	Eskom	Chatworth	partly cloudy, cool	moderate	90	86.7	Canary Cape	4	least concern	no sign	scrub & forests	09:00:00	late morning	0.5	absent	1	0	1	0
2010-12-08	Dec	Summer 2010-11	birds	1	P22	Eskom	Chatworth	partly cloudy, cool	moderate	90	86.7	Chat Ant-eating	22	least concern	no sign	grassland	09:00:00	late morning	0.5	absent	1	0	1	0
2010-12-08	Dec	Summer 2010-11	birds	1	P22	Eskom	Chatworth	partly cloudy, cool	moderate	90	86.7	Cisticola Wing-snapping	1	least concern	no sign	grassland	09:00:00	late morning	0.5	absent	1	0	1	0
2010-12-08	Dec	Summer 2010-11	birds	1	P22	Eskom	Chatworth	partly cloudy, cool	moderate	90	86.7	Cisticola Zitting	3	least concern	no sign	grassland	09:00:00	late morning	0.5	absent	1	0	1	0
2010-12-08	Dec	Summer 2010-11	birds	1	P22	Eskom	Chatworth	partly cloudy, cool	moderate	90	86.7	Ibis Hadeda	21	least concern	no sign	marsh & wetlands	09:00:00	late morning	0.5	absent	1	0	1	0
2010-12-08	Dec	Summer 2010-11	birds	1	P22	Eskom	Chatworth	partly cloudy, cold	strong	65	63.3	Korhaan White-bellied	21	rare	no sign	grassland	09:00:00	late morning	0.5	present
2010-12-08	Dec	Summer 2010-11	birds	1	P22	Eskom	Chatworth	partly cloudy, cool	moderate	90	86.7	Lark Eastern Long-billed	1	least concern	no sign	grassland	09:00:00	late morning	0.5	absent	1	1	0	0
2010-12-08	Dec	Summer 2010-11	birds	1	P22	Eskom	Chatworth	partly cloudy, cool	moderate	90	86.7	Lark Eastern Long-billed	18	least concern	no sign	grassland	09:00:00	late morning	0.5	absent	1	1	0	0
2010-12-08	Dec	Summer 2010-11	birds	1	P22	Eskom	Chatworth	partly cloudy, cold	strong	65	63.3	Longclaw Cape	8	abundant	no sign	grassland	09:00:00	late morning	0.5	present	1	0	1	0
2010-12-08	Dec	Summer 2010-11	birds	1	P22	Eskom	Chatworth	partly cloudy, cold	strong	65	63.3	Longclaw Cape	9	abundant	no sign	grassland	09:00:00	late morning	0.5	present	1	0	1	0
2010-12-08	Dec	Summer 2010-11	birds	1	P22	Eskom	Chatworth	partly cloudy, cold	strong	65	63.3	Longclaw Cape	15	abundant	no sign	grassland	09:00:00	late morning	0.5	present	1	1	0	0
2010-12-08	Dec	Summer 2010-11	birds	1	P22	Eskom	Chatworth	partly cloudy, cold	strong	65	63.3	Longclaw Cape	16	abundant	no sign	grassland	09:00:00	late morning	0.5	present	1	0	1	0
2010-12-08	Dec	Summer 2010-11	birds	1	P22	Eskom	Chatworth	partly cloudy, cold	strong	65	63.3	Longclaw Cape	22	abundant	no sign	grassland	09:00:00	late morning	0.5	present	1	0	1	0
2010-12-08	Dec	Summer 2010-11	birds	1	P22	Eskom	Chatworth	partly cloudy, cool	moderate	90	86.7	Longclaw Cape	7	abundant	no sign	grassland	09:00:00	late morning	0.5	absent	1	0	1	0
2010-12-08	Dec	Summer 2010-11	birds	1	P22	Eskom	Chatworth	partly cloudy, cold	strong	65	63.3	Martin Banded	2	least concern	no sign	aerial feeder	09:00:00	late morning	0.5	present	1	0	1	0
2010-12-08	Dec	Summer 2010-11	birds	1	P22	Eskom	Chatworth	partly cloudy, cold	strong	65	63.3	Pipit African	18	abundant	no sign	grassland	09:00:00	late morning	0.5	present	1	0	1	0
2010-12-08	Dec	Summer 2010-11	birds	1	P22	Eskom	Chatworth	partly cloudy, cold	strong	65	63.3	Pipit African	21	abundant	no sign	grassland	09:00:00	late morning	0.5	present	1	0	0	1
2010-12-08	Dec	Summer 2010-11	birds	1	P22	Eskom	Chatworth	partly cloudy, cool	strong	90	80	Pipit Yellow-breasted	1	abundant	no sign	grassland	09:00:00	late morning	0.5	present	1	0	1	0
2010-12-08	Dec	Summer 2010-11	birds	1	P22	Eskom	Chatworth	partly cloudy, cool	strong	90	80	Pipit Yellow-breasted	4	abundant	no sign	grassland	09:00:00	late morning	0.5	present	1	0	1	0
2010-12-08	Dec	Summer 2010-11	birds	1	P22	Eskom	Chatworth	partly cloudy, cool	strong	90	80	Pipit Yellow-breasted	16	abundant	no sign	grassland	09:00:00	late morning	0.5	present	1	0	1	0
2010-12-08	Dec	Summer 2010-11	birds	1	P22	Eskom	Chatworth	partly cloudy, cool	strong	90	80	Pipit Yellow-breasted	23	abundant	no sign	grassland	09:00:00	late morning	0.5	present	1	0	1	0
2010-12-08	Dec	Summer 2010-11	birds	1	P22	Eskom	Chatworth	partly cloudy, cool	moderate	90	86.7	Quail Common	1	uncommon	no sign	grassland	09:00:00	late morning	0.5	present	1	0	1	0
2010-12-08	Dec	Summer 2010-11	birds	1	P22	Eskom	Chatworth	partly cloudy, cool	moderate	90	86.7	Quail Common	18	uncommon	no sign	grassland	09:00:00	late morning	0.5	present	1	1	0	0
2010-12-08	Dec	Summer 2010-11	birds	1	P22	Eskom	Chatworth	partly cloudy, cool	moderate	90	86.7	Quailfinch African	8	rare	no sign	grassland	09:00:00	late morning	0.5	present	1	0	1	0
2010-12-08	Dec	Summer 2010-11	birds	1	P22	Eskom	Chatworth	partly cloudy, cool	moderate	90	86.7	Raven White-necked	8	least concern	no sign	grassland	09:00:00	late morning	0.5	present	1	0	1	0
2010-12-08	Dec	Summer 2010-11	birds	1	P22	Eskom	Chatworth	partly cloudy, cool	moderate	90	86.7	Swallow Barn	18	least concern	no sign	aerial feeder	09:00:00	late morning	0.5	present	1	0	1	0
2010-12-08	Dec	Summer 2010-11	birds	1	P22	Eskom	Chatworth	partly cloudy, cool	moderate	90	86.7	Vulture Cape	10	least concern	no sign	raptor	09:00:00	late morning	0.5	present	1	0	1	0
2010-12-08	Dec	Summer 2010-11	birds	1	P22	Eskom	Chatworth	partly cloudy, cool	moderate	90	86.7	Widowbird Long-tailed	8	uncommon	no sign	grassland	09:00:00	late morning	0.5	present	1	0	1	0
2010-12-08	Dec	Summer 2010-11	birds	1	P22	Eskom	Chatworth	partly cloudy, cool	moderate	90	86.7	Widowbird Long-tailed	22	uncommon	no sign	grassland	09:00:00	late morning	0.5	present	1	0	1	0
2010-12-08	Dec	Summer 2010-11	vegetation	3	P22	Eskom	Chatworth					Buzzard Steppe				raptor			0.5
2010-12-08	Dec	Summer 2010-11	vegetation	3	P22	Eskom	Chatworth					Cisticola Wing-snapping				grassland			0.5
2010-12-08	Dec	Summer 2010-11	vegetation	3	P22	Eskom	Chatworth					Cisticola Zitting				grassland			0.5
2010-12-08	Dec	Summer 2010-11	vegetation	3	P22	Eskom	Chatworth					Ibis Hadeda				marsh & wetlands			0.5
2010-12-08	Dec	Summer 2010-11	vegetation	3	P22	Eskom	Chatworth					Lark Eastern Long-billed				grassland			0.5
2010-12-08	Dec	Summer 2010-11	vegetation	3	P22	Eskom	Chatworth					Longclaw Cape				grassland			0.5
2010-12-08	Dec	Summer 2010-11	vegetation	3	P22	Eskom	Chatworth					Martin Banded				aerial feeder			0.5
2010-12-08	Dec	Summer 2010-11	vegetation	3	P22	Eskom	Chatworth					Swallow Barn				aerial feeder			0.5
2010-12-08	Dec	Summer 2010-11	vegetation	3	P22	Eskom	Chatworth					Widowbird Long-tailed				grassland			0.5
2010-12-17	Dec	Summer 2010-11	birds	2	P22	Eskom	Chatworth	clear , cool	strong	100	86.7	Bishop Southern-red	14	least concern	no sign	grassland	10:00:00	late morning	0.5	absent	1	0	1	0
2010-12-17	Dec	Summer 2010-11	birds	2	P22	Eskom	Chatworth	clear , cool	strong	100	86.7	Cisticola Wing-snapping	18	least concern	no sign	grassland	10:00:00	late morning	0.5	absent	1	0	1	0
2010-12-17	Dec	Summer 2010-11	birds	2	P22	Eskom	Chatworth	clear , cool	strong	100	86.7	Cisticola Zitting	21	least concern	no sign	grassland	10:00:00	late morning	0.5	absent	1	0	1	0
2010-12-17	Dec	Summer 2010-11	birds	2	P22	Eskom	Chatworth	clear , cool	strong	100	86.7	Lark Eastern Long-billed	14	least concern	no sign	grassland	10:00:00	late morning	0.5	absent	1	0	1	0
2010-12-17	Dec	Summer 2010-11	birds	2	P22	Eskom	Chatworth	clear , cool	strong	100	86.7	Longclaw Cape	2	uncommon	no sign	grassland	10:00:00	late morning	0.5	absent	1	0	1	0
2010-12-17	Dec	Summer 2010-11	birds	2	P22	Eskom	Chatworth	clear , cool	strong	100	86.7	Longclaw Cape	4	uncommon	no sign	grassland	10:00:00	late morning	0.5	absent	1	0	1	0
2010-12-17	Dec	Summer 2010-11	birds	2	P22	Eskom	Chatworth	clear , cool	strong	100	86.7	Martin Banded	22	least concern	no sign	aerial feeder	10:00:00	late morning	0.5	absent	1	0	1	0
2010-12-17	Dec	Summer 2010-11	birds	2	P22	Eskom	Chatworth	clear , cool	strong	100	86.7	Pipit Yellow-breasted	26	rare	no sign	grassland	10:00:00	late morning	0.5	absent	1	1	0	0
2010-12-17	Dec	Summer 2010-11	birds	2	P22	Eskom	Chatworth	clear , cool	strong	100	86.7	Quail Common	1	uncommon	no sign	grassland	10:00:00	late morning	0.5	absent	1	0	1	0
2010-12-17	Dec	Summer 2010-11	birds	2	P22	Eskom	Chatworth	clear , cool	strong	100	86.7	Quail Common	2	uncommon	no sign	grassland	10:00:00	late morning	0.5	absent	1	0	1	0
2010-12-17	Dec	Summer 2010-11	birds	2	P22	Eskom	Chatworth	clear , cool	strong	100	86.7	Quailfinch African	22	rare	no sign	grassland	10:00:00	late morning	0.5	present	1	0	1	0
2010-12-17	Dec	Summer 2010-11	birds	2	P22	Eskom	Chatworth	clear , cool	strong	100	86.7	Widowbird Long-tailed	20	uncommon	no sign	grassland	10:00:00	late morning	0.5	present	1	0	1	0
2010-12-17	Dec	Summer 2010-11	birds	2	P22	Eskom	Chatworth	clear , cool	strong	100	86.7	Widowbird Long-tailed	6	uncommon	no sign	grassland	10:00:00	late morning	0.5	present	1	0	1	0
2010-12-17	Dec	Summer 2010-11	birds	2	P22	Eskom	Chatworth	clear , cool	strong	100	86.7	Widowbird Long-tailed	21	uncommon	no sign	grassland	10:00:00	late morning	0.5	present	1	0	1	0
2011-11-22	Nov	Summer 2011-12	birds	1	P22	Eskom	Chatworth	misty, cool	calm	75	83.3	Chat Ant-eating	21	least concern	no sign	grassland	15:30:00	mid-afternoon	0.5	absent	1
2011-11-22	Nov	Summer 2011-12	birds	1	P22	Eskom	Chatworth	misty, cool	calm	75	83.3	Cisticola Wing-snapping	2	least concern	no sign	grassland	15:30:00	mid-afternoon	0.5	absent	1
2011-11-22	Nov	Summer 2011-12	birds	1	P22	Eskom	Chatworth	misty, cool	calm	75	83.3	Korhaan White-bellied	7	rare	no sign	grassland	15:30:00	mid-afternoon	0.5	absent	1
2011-11-22	Nov	Summer 2011-12	birds	1	P22	Eskom	Chatworth	misty, cool	calm	75	83.3	Lark Eastern Long-billed	7	least concern	no sign	grassland	15:30:00	mid-afternoon	0.5	absent	1
2011-11-22	Nov	Summer 2011-12	birds	1	P22	Eskom	Chatworth	misty, cool	calm	75	83.3	Lark Red-capped	2	uncommon	no sign	grassland	15:30:00	mid-afternoon	0.5	absent	1
2011-11-22	Nov	Summer 2011-12	birds	1	P22	Eskom	Chatworth	misty, cool	calm	75	83.3	Lark Red-capped	12	uncommon	no sign	grassland	15:30:00	mid-afternoon	0.5	absent	1
2011-11-22	Nov	Summer 2011-12	birds	1	P22	Eskom	Chatworth	misty, cool	calm	75	83.3	Longclaw Cape	3	common	no sign	grassland	15:30:00	mid-afternoon	0.5	absent	1
2011-11-22	Nov	Summer 2011-12	birds	1	P22	Eskom	Chatworth	misty, cool	calm	75	83.3	Longclaw Cape	12	common	no sign	grassland	15:30:00	mid-afternoon	0.5	absent	1
2011-11-22	Nov	Summer 2011-12	birds	1	P22	Eskom	Chatworth	misty, cool	calm	75	83.3	Longclaw Cape	17	common	no sign	grassland	15:30:00	mid-afternoon	0.5	absent	1
2011-11-22	Nov	Summer 2011-12	birds	1	P22	Eskom	Chatworth	misty, cool	calm	75	83.3	Longclaw Cape	20	common	no sign	grassland	15:30:00	mid-afternoon	0.5	absent	1
2011-11-22	Nov	Summer 2011-12	birds	1	P22	Eskom	Chatworth	misty, cool	calm	75	83.3	Martin Banded	10	least concern	no sign	aerial feeder	15:30:00	mid-afternoon	0.5	absent	1
2011-11-22	Nov	Summer 2011-12	birds	1	P22	Eskom	Chatworth	misty, cool	calm	75	83.3	Pipit African	1	rare	no sign	grassland	15:30:00	mid-afternoon	0.5	absent	1
2011-11-22	Nov	Summer 2011-12	birds	1	P22	Eskom	Chatworth	misty, cool	calm	75	83.3	Quail Common	1	uncommon	no sign	grassland	15:30:00	mid-afternoon	0.5	absent	1
2011-11-22	Nov	Summer 2011-12	birds	1	P22	Eskom	Chatworth	misty, cool	calm	75	83.3	Quail Common	5	uncommon	no sign	grassland	15:30:00	mid-afternoon	0.5	absent	1
2011-11-22	Nov	Summer 2011-12	birds	1	P22	Eskom	Chatworth	misty, cool	calm	75	83.3	Swallow Barn	21	least concern	no sign	aerial feeder	15:30:00	mid-afternoon	0.5	absent	1
2011-11-22	Nov	Summer 2011-12	birds	1	P22	Eskom	Chatworth	misty, cool	calm	75	83.3	Widowbird Long-tailed	21	rare	no sign	grassland	15:30:00	mid-afternoon	0.5	absent	1
2011-11-22	Nov	Summer 2011-12	vegetation	3	P22	Eskom	Chatworth	clear, hot	calm	80	86.7	Cisticola Wing-snapping				grassland			0.5
2011-11-22	Nov	Summer 2011-12	vegetation	3	P22	Eskom	Chatworth	clear, hot	calm	80	86.7	Korhaan White-bellied				grassland			0.5
2011-11-22	Nov	Summer 2011-12	vegetation	3	P22	Eskom	Chatworth	clear, hot	calm	80	86.7	Lark Red-capped				grassland			0.5
2011-11-22	Nov	Summer 2011-12	vegetation	3	P22	Eskom	Chatworth	clear, hot	calm	80	86.7	Longclaw Cape				grassland			0.5
2011-11-22	Nov	Summer 2011-12	vegetation	3	P22	Eskom	Chatworth	clear, hot	calm	80	86.7	Martin Banded				aerial feeder			0.5
2011-11-22	Nov	Summer 2011-12	vegetation	3	P22	Eskom	Chatworth	clear, hot	calm	80	86.7	Pipit African				grassland			0.5
2011-11-22	Nov	Summer 2011-12	vegetation	3	P22	Eskom	Chatworth	clear, hot	calm	80	86.7	Quail Common				grassland			0.5
2011-11-22	Nov	Summer 2011-12	vegetation	3	P22	Eskom	Chatworth	clear, hot	calm	80	86.7	Swallow Greater-striped				aerial feeder			0.5
2011-11-22	Nov	Summer 2011-12	vegetation	3	P22	Eskom	Chatworth	clear, hot	calm	80	86.7	Widowbird Long-tailed				grassland			0.5
2011-11-23	Nov	Summer 2011-12	birds	2	P22	Eskom	Chatworth	partly cloudy, cool	moderate	90	86.7	Martin Banded	1	least concern	no sign	aerial feeder	09:30:00	Late-morning	0.5	absent	1
2011-11-23	Nov	Summer 2011-12	birds	2	P22	Eskom	Chatworth	partly cloudy, cool	moderate	90	86.7	Pipit African	10	least concern	no sign	grassland	09:30:00	Late-morning	0.5	absent	1
2011-11-23	Nov	Summer 2011-12	birds	2	P22	Eskom	Chatworth	partly cloudy, cool	moderate	90	86.7	Quail Common	1	least concern	no sign	grassland	09:30:00	Late-morning	0.5	absent	1
2011-11-23	Nov	Summer 2011-12	birds	2	P22	Eskom	Chatworth	partly cloudy, cool	moderate	90	86.7	Quail Common	17	least concern	no sign	grassland	09:30:00	Late-morning	0.5	absent	1
2011-11-23	Nov	Summer 2011-12	birds	2	P22	Eskom	Chatworth	partly cloudy, cool	moderate	90	86.7	Swallow Greater-striped	24	least concern	no sign	aerial feeder	09:30:00	Late-morning	0.5	absent	1
2011-11-23	Nov	Summer 2011-12	birds	2	P22	Eskom	Chatworth	partly cloudy, cool	moderate	90	86.7	Cisticola Wing-snapping	5	least concern	no sign	grassland	09:30:00	Late-morning	0.5	absent	1
2011-11-23	Nov	Summer 2011-12	birds	2	P22	Eskom	Chatworth	partly cloudy, cool	moderate	90	86.7	Korhaan White-bellied	25	least concern	no sign	grassland	09:30:00	Late-morning	0.5	absent	1
2011-11-23	Nov	Summer 2011-12	birds	2	P22	Eskom	Chatworth	partly cloudy, cool	moderate	90	86.7	Lark Eastern Long-billed	1	least concern	no sign	grassland	09:30:00	Late-morning	0.5	absent	1
2011-11-23	Nov	Summer 2011-12	birds	2	P22	Eskom	Chatworth	partly cloudy, cool	moderate	90	86.7	Longclaw Cape	15	rare	no sign	grassland	09:30:00	Late-morning	0.5	absent	1
2011-11-23	Nov	Summer 2011-12	birds	2	P22	Eskom	Chatworth	partly cloudy, cool	moderate	90	86.7	Pipit Yellow-breasted	25	least concern	breeding	grassland	09:30:00	Late-morning	0.5	absent	1
2011-12-14	Dec	Summer 2011-12	birds	1	P22	Eskom	Chatworth	cloudy, cool	moderate	85	83.3	Bishop Southern-red	1	least concern	no sign	grassland	14:30:00	early noon	0.5	present	1
2011-12-14	Dec	Summer 2011-12	birds	1	P22	Eskom	Chatworth	cloudy, cool	moderate	85	83.3	Bustard Denham's	12	least concern	no sign	grassland	14:30:00	early noon	0.5	present	1
2011-12-14	Dec	Summer 2011-12	birds	1	P22	Eskom	Chatworth	cloudy, cool	moderate	85	83.3	Canary Cape	17	least concern	no sign	scrub & forests	14:30:00	early noon	0.5	present	1
2011-12-14	Dec	Summer 2011-12	birds	1	P22	Eskom	Chatworth	cloudy, cool	moderate	85	83.3	Cisticola Wing-snapping	7	least concern	no sign	grassland	14:30:00	early noon	0.5	present	1
2011-12-14	Dec	Summer 2011-12	birds	1	P22	Eskom	Chatworth	cloudy, cool	moderate	85	83.3	Cisticola Zitting	1	least concern	no sign	grassland	14:30:00	early noon	0.5	present	1
2011-12-14	Dec	Summer 2011-12	birds	1	P22	Eskom	Chatworth	cloudy, cool	moderate	85	83.3	Crow Cape	1	least concern	none breeder	grassland	14:30:00	early noon	0.5	present	1
2011-12-14	Dec	Summer 2011-12	birds	1	P22	Eskom	Chatworth	cloudy, cool	moderate	85	83.3	Korhaan White-bellied	13	least concern	no sign	grassland	14:30:00	early noon	0.5	present	1
2011-12-14	Dec	Summer 2011-12	birds	1	P22	Eskom	Chatworth	cloudy, cool	moderate	85	83.3	Martin Banded	18	least concern	no sign	aerial feeder	14:30:00	early noon	0.5	absent
2011-12-14	Dec	Summer 2011-12	birds	1	P22	Eskom	Chatworth	cloudy, cool	moderate	85	83.3	Pipit African	1	uncommon	no sign	grassland	14:30:00	early noon	0.5	absent
2011-12-14	Dec	Summer 2011-12	birds	1	P22	Eskom	Chatworth	cloudy, cool	moderate	85	83.3	Pipit African	3	uncommon	no sign	grassland	14:30:00	early noon	0.5	absent
2011-12-14	Dec	Summer 2011-12	birds	1	P22	Eskom	Chatworth	cloudy, cool	moderate	85	83.3	Quail Common	1	uncommon	no sign	grassland	14:30:00	early noon	0.5	present	1
2011-12-14	Dec	Summer 2011-12	birds	1	P22	Eskom	Chatworth	cloudy, cool	moderate	85	83.3	Quail Common	19	uncommon	no sign	grassland	14:30:00	early noon	0.5	present	1
2011-12-14	Dec	Summer 2011-12	birds	1	P22	Eskom	Chatworth	cloudy, cool	moderate	85	83.3	Quailfinch African	23	rare	no sign	grassland	14:30:00	early noon	0.5	present	1
2011-12-14	Dec	Summer 2011-12	birds	1	P22	Eskom	Chatworth	cloudy, cool	moderate	85	83.3	Raven white-necked	12	least concern	none breeder	grassland	14:30:00	early noon	0.5	present	1
2011-12-14	Dec	Summer 2011-12	birds	1	P22	Eskom	Chatworth	cloudy, cool	moderate	85	83.3	Wheater Mountain	21	least concern	no sign	grassland	14:30:00	early noon	0.5	absent	1
2011-12-14	Dec	Summer 2011-12	vegetation	3	P22	Eskom	Chatworth	cloudy, cold	strong	60	60	Bishop Southern-red				grassland			0.5
2011-12-14	Dec	Summer 2011-12	vegetation	3	P22	Eskom	Chatworth	cloudy, cold	strong	60	60	Bustard White-bellied				grassland			0.5
2011-12-14	Dec	Summer 2011-12	vegetation	3	P22	Eskom	Chatworth	cloudy, cold	strong	60	60	Canary Cape				scrub & forests			0.5
2011-12-14	Dec	Summer 2011-12	vegetation	3	P22	Eskom	Chatworth	cloudy, cold	strong	60	60	Cisticola Wing-snapping				grassland			0.5
2011-12-14	Dec	Summer 2011-12	vegetation	3	P22	Eskom	Chatworth	cloudy, cold	strong	60	60	Cisticola Zitting				grassland			0.5
2011-12-14	Dec	Summer 2011-12	vegetation	3	P22	Eskom	Chatworth	cloudy, cold	strong	60	60	Lark Eastern Long-billed				grassland			0.5
2011-12-14	Dec	Summer 2011-12	vegetation	3	P22	Eskom	Chatworth	cloudy, cold	strong	60	60	Longclaw Cape				grassland			0.5
2011-12-14	Dec	Summer 2011-12	vegetation	3	P22	Eskom	Chatworth	cloudy, cold	strong	60	60	Martin Banded				aerial feeder			0.5
2011-12-14	Dec	Summer 2011-12	vegetation	3	P22	Eskom	Chatworth	cloudy, cold	strong	60	60	Pipit African				grassland			0.5
2011-12-14	Dec	Summer 2011-12	vegetation	3	P22	Eskom	Chatworth	cloudy, cold	strong	60	60	Quail Common				grassland			0.5
2011-12-14	Dec	Summer 2011-12	vegetation	3	P22	Eskom	Chatworth	cloudy, cold	strong	60	60	Starling Pied				grassland			0.5
2011-12-16	Dec	Summer 2011-12	birds	2	P22	Eskom	Chatworth	clear, hot	moderate	80	80	Pipit African	3	uncommon		grassland	14:30:00	early noon	0.5	absent	1
2011-12-16	Dec	Summer 2011-12	birds	2	P22	Eskom	Chatworth	clear, hot	moderate	80	80	Pipit African	4	uncommon		grassland	14:30:00	early noon	0.5	absent	1
2011-12-16	Dec	Summer 2011-12	birds	2	P22	Eskom	Chatworth	clear, hot	moderate	80	80	Pipit African	9	uncommon		grassland	14:30:00	early noon	0.5	absent	1
2011-12-16	Dec	Summer 2011-12	birds	2	P22	Eskom	Chatworth	clear, hot	moderate	80	80	Cisticola Wing-snapping	5	least concern		grassland	14:30:00	early noon	0.5	absent	1
2011-12-16	Dec	Summer 2011-12	birds	2	P22	Eskom	Chatworth	clear, hot	moderate	80	80	Korhaan White-bellied	7	rare		grassland	14:30:00	early noon	0.5	absent	1
2011-12-16	Dec	Summer 2011-12	birds	2	P22	Eskom	Chatworth	clear, hot	moderate	80	80	Quail Common	7	uncommon		grassland	14:30:00	early noon	0.5	absent	1
2011-12-16	Dec	Summer 2011-12	birds	2	P22	Eskom	Chatworth	clear, hot	moderate	80	80	Quailfinch African	7	rare		grassland	14:30:00	early noon	0.5	absent	1
2011-12-16	Dec	Summer 2011-12	birds	2	P22	Eskom	Chatworth	clear, hot	moderate	80	80	Quailfinch African	11	rare		grassland	14:30:00	early noon	0.5	absent	1
2011-12-16	Dec	Summer 2011-12	birds	2	P22	Eskom	Chatworth	clear, hot	moderate	80	80	Crow Cape	13	least concern		grassland	14:30:00	early noon	0.5	absent	1
2011-12-16	Dec	Summer 2011-12	birds	2	P22	Eskom	Chatworth	clear, hot	moderate	80	80	Martin Banded	14	least concern		grassland	14:30:00	early noon	0.5	absent	1
2011-12-16	Dec	Summer 2011-12	birds	2	P22	Eskom	Chatworth	clear, hot	moderate	80	80	Longclaw Cape	15	uncommon		grassland	14:30:00	early noon	0.5	absent	1
2011-12-16	Dec	Summer 2011-12	birds	2	P22	Eskom	Chatworth	clear, hot	moderate	80	80	Cisticola Zitting	16	least concern		grassland	14:30:00	early noon	0.5	absent	1
2011-12-16	Dec	Summer 2011-12	birds	2	P22	Eskom	Chatworth	clear, hot	moderate	80	80	Cisticola Zitting	17	least concern		grassland	14:30:00	early noon	0.5	absent	1
2012-01-11	Jan	Summer 2011-12	birds	1	P22	Eskom	Chatworth	clear , cool	moderate	100	93.3	Bishop Southern Golden	5	least concern	no sign	grassland	10:30:00	late morning	0.5	present	1
2012-01-11	Jan	Summer 2011-12	birds	1	P22	Eskom	Chatworth	clear , cool	moderate	100	93.3	Cisticola Wing-snapping	4	least concern	breeding	grassland	10:30:00	late morning	0.5	present	1
2012-01-11	Jan	Summer 2011-12	birds	1	P22	Eskom	Chatworth	clear , cool	moderate	100	93.3	Cisticola Zitting	3	least concern	breeding	grassland	10:30:00	late morning	0.5	present	1
2012-01-11	Jan	Summer 2011-12	birds	1	P22	Eskom	Chatworth	clear , cool	moderate	100	93.3	Crow Cape	19	least concern	no sign	grassland	10:30:00	late morning	0.5	present	1
2012-01-11	Jan	Summer 2011-12	birds	1	P22	Eskom	Chatworth	clear , cool	moderate	100	93.3	Falcon Amur	11	rare	no sign	grassland raptor	10:30:00	late morning	0.5	present	1
2012-01-11	Jan	Summer 2011-12	birds	1	P22	Eskom	Chatworth	clear , cool	moderate	100	93.3	Lark Eastern Long-billed	3	least concern	no sign	grassland	10:30:00	late morning	0.5	present	1
2012-01-11	Jan	Summer 2011-12	birds	1	P22	Eskom	Chatworth	clear , cool	moderate	100	93.3	Lark Red-capped	3	rare	no sign	grassland	10:30:00	late morning	0.5	present	1
2012-01-11	Jan	Summer 2011-12	birds	1	P22	Eskom	Chatworth	clear , cool	moderate	100	93.3	Longclaw Cape	1	rare	none breeder	grassland	10:30:00	late morning	0.5	present	1
2012-01-11	Jan	Summer 2011-12	birds	1	P22	Eskom	Chatworth	clear , cool	moderate	100	93.3	Pipit African	9	common	no sign	grassland	10:30:00	late morning	0.5	present	1
2012-01-11	Jan	Summer 2011-12	birds	1	P22	Eskom	Chatworth	clear , cool	moderate	100	93.3	Pipit African	11	common	no sign	grassland	10:30:00	late morning	0.5	present	1
2012-01-11	Jan	Summer 2011-12	birds	1	P22	Eskom	Chatworth	clear , cool	moderate	100	93.3	Pipit African	12	common	no sign	grassland	10:30:00	late morning	0.5	present	1
2012-01-11	Jan	Summer 2011-12	birds	1	P22	Eskom	Chatworth	clear , cool	moderate	100	93.3	Pipit African	17	common	no sign	grassland	10:30:00	late morning	0.5	present	1
2012-01-11	Jan	Summer 2011-12	birds	1	P22	Eskom	Chatworth	clear , cool	moderate	100	93.3	Pipit Yellow-breasted	2	rare	no sign	grassland	10:30:00	late morning	0.5	present	1
2012-01-11	Jan	Summer 2011-12	birds	1	P22	Eskom	Chatworth	clear , cool	moderate	100	93.3	Quail Common	20	uncommon	no sign	grassland	10:30:00	late morning	0.5	present	1
2012-01-11	Jan	Summer 2011-12	birds	1	P22	Eskom	Chatworth	clear , cool	moderate	100	93.3	Quail Common	23	uncommon	no sign	grassland	10:30:00	late morning	0.5	present	1
2012-01-11	Jan	Summer 2011-12	birds	1	P22	Eskom	Chatworth	clear , cool	moderate	100	93.3	Quail Common	27	uncommon	no sign	grassland	10:30:00	late morning	0.5	present	1
2012-01-11	Jan	Summer 2011-12	birds	1	P22	Eskom	Chatworth	clear , cool	moderate	100	93.3	Starling Pied	3	least concern	no sign	grassland	10:30:00	late morning	0.5	present	1
2012-01-11	Jan	Summer 2011-12	birds	1	P22	Eskom	Chatworth	clear , cool	moderate	100	93.3	Swallow Greater-striped	19	least concern	no sign	aerial feeder	10:30:00	late morning	0.5	present	1
2012-01-11	Jan	Summer 2011-12	vegetation	3	P22	Eskom	Chatworth	clear, hot	calm	80	86.7	Cisticola Wing-snapping				grassland			0.5
2012-01-11	Jan	Summer 2011-12	vegetation	3	P22	Eskom	Chatworth	clear, hot	calm	80	86.7	Cisticola Zitting				grassland			0.5
2012-01-11	Jan	Summer 2011-12	vegetation	3	P22	Eskom	Chatworth	clear, hot	calm	80	86.7	Falcon Amur				grassland raptor			0.5
2012-01-11	Jan	Summer 2011-12	vegetation	3	P22	Eskom	Chatworth	clear, hot	calm	80	86.7	Korhaan White-bellied				grassland
2012-01-11	Jan	Summer 2011-12	vegetation	3	P22	Eskom	Chatworth	clear, hot	calm	80	86.7	Lark Eastern Long-billed				grassland			0.5
2012-01-11	Jan	Summer 2011-12	vegetation	3	P22	Eskom	Chatworth	clear, hot	calm	80	86.7	Lark Red-capped				grassland			0.5
2012-01-11	Jan	Summer 2011-12	vegetation	3	P22	Eskom	Chatworth	clear, hot	calm	80	86.7	Longclaw Cape				grassland			0.5
2012-01-11	Jan	Summer 2011-12	vegetation	3	P22	Eskom	Chatworth	clear, hot	calm	80	86.7	Martin Banded				aerial feeder			0.5
2012-01-11	Jan	Summer 2011-12	vegetation	3	P22	Eskom	Chatworth	clear, hot	calm	80	86.7	Pipit African				grassland			0.5
2012-01-11	Jan	Summer 2011-12	vegetation	3	P22	Eskom	Chatworth	clear, hot	calm	80	86.7	Pipit Yellow-breasted				grassland			0.5
2012-01-11	Jan	Summer 2011-12	vegetation	3	P22	Eskom	Chatworth	clear, hot	calm	80	86.7	Quail Common				grassland			0.5
2012-01-11	Jan	Summer 2011-12	vegetation	3	P22	Eskom	Chatworth	clear, hot	calm	80	86.7	Secretarybird				grassland raptor
2012-01-11	Jan	Summer 2011-12	vegetation	3	P22	Eskom	Chatworth	clear, hot	calm	80	86.7	Starling Pied				grassland			0.5
2012-01-11	Jan	Summer 2011-12	vegetation	3	P22	Eskom	Chatworth	clear, hot	calm	80	86.7	Swallow Barn				aerial feeder			0.5
2012-01-11	Jan	Summer 2011-12	vegetation	3	P22	Eskom	Chatworth	clear, hot	calm	80	86.7	Swallow Greater-striped				aerial feeder			0.5
2012-01-12	Jan	Summer 2011-12	birds	2	P22	Eskom	Chatworth	clear , hot	calm	80	86.7	Cisticola Wing-snapping	1	least concern	no sign	grassland	08:00:00	mid-morning	0.5	present	1
2012-01-12	Jan	Summer 2011-12	birds	2	P22	Eskom	Chatworth	clear , hot	calm	80	86.7	Falcon Amur	7	rare	no sign	grassland raptor	08:00:00	mid-morning	0.5	present	1
2012-01-12	Jan	Summer 2011-12	birds	2	P22	Eskom	Chatworth	clear , hot	calm	80	86.7	Longclaw Cape	1	rare	no sign	grassland	08:00:00	mid-morning	0.5	present	1
2012-01-12	Jan	Summer 2011-12	birds	2	P22	Eskom	Chatworth	clear , hot	calm	80	86.7	Martin Banded	2	least concern	no sign	aerial feeder	08:00:00	mid-morning	0.5	present	1
2012-01-12	Jan	Summer 2011-12	birds	2	P22	Eskom	Chatworth	clear , hot	calm	80	86.7	Pipit African	3	rare	no sign	grassland	08:00:00	mid-morning	0.5	present	1
2012-01-12	Jan	Summer 2011-12	birds	2	P22	Eskom	Chatworth	clear , hot	calm	80	86.7	Pipit Yellow-breasted	11	rare	no sign	grassland	08:00:00	mid-morning	0.5	absent	1
2012-01-12	Jan	Summer 2011-12	birds	2	P22	Eskom	Chatworth	clear , hot	calm	80	86.7	Quail Common	5	rare	no sign	grassland	08:00:00	mid-morning	0.5	absent	1
2012-01-12	Jan	Summer 2011-12	birds	2	P22	Eskom	Chatworth	clear , hot	calm	80	86.7	Starling Pied	20	least concern	no sign	grassland	08:00:00	mid-morning	0.5	absent	1
2012-01-12	Jan	Summer 2011-12	birds	2	P22	Eskom	Chatworth	clear , hot	calm	80	86.7	Thick-knee Spotted	7	least concern	no sign	grassland	08:00:00	mid-morning	0.5	absent	1
2012-01-12	Jan	Summer 2011-12	birds	2	P22	Eskom	Chatworth	clear , hot	calm	80	86.7	Widowbird Long-tailed	17	rare	no sign	grassland	08:00:00	mid-morning	0.5	absent	1
2012-02-11	Feb	Summer 2011-12	birds	1	P22	Eskom	Chatworth	clear , cool	strong	100	86.7	Chat Ant-eating	13	least concern	no sign	grassland	10:30:00	late morning	0.5	absent	1
2012-02-11	Feb	Summer 2011-12	birds	1	P22	Eskom	Chatworth	clear , cool	strong	100	86.7	Cisticola Wing-snapping	1	least concern	no sign	grassland	10:30:00	late morning	0.5	absent	1
2012-02-11	Feb	Summer 2011-12	birds	1	P22	Eskom	Chatworth	clear , cool	strong	100	86.7	Cisticola Zitting	27	least concern	no sign	grassland	10:30:00	late morning	0.5	absent	1
2012-02-11	Feb	Summer 2011-12	birds	1	P22	Eskom	Chatworth	clear , cool	strong	100	86.7	cliff-swallow South African	17	least concern	none breeder	aerial feeder	10:30:00	late morning	0.5	absent	1
2012-02-11	Feb	Summer 2011-12	birds	1	P22	Eskom	Chatworth	clear , cool	strong	100	86.7	Lark Eastern Long-billed	10	least concern	no sign	grassland	10:30:00	late morning	0.5	absent	1
2012-02-11	Feb	Summer 2011-12	birds	1	P22	Eskom	Chatworth	clear , cool	strong	100	86.7	Longclaw Cape	17	rare	breeding	grassland	10:30:00	late morning	0.5	absent	1
2012-02-11	Feb	Summer 2011-12	birds	1	P22	Eskom	Chatworth	clear , cool	strong	100	86.7	Martin Banded	15	least concern	no sign	aerial feeder	10:30:00	late morning	0.5	absent	1
2012-02-11	Feb	Summer 2011-12	birds	1	P22	Eskom	Chatworth	clear , cool	strong	100	86.7	Pipit African	1	rare	no sign	grassland	10:30:00	late morning	0.5	absent	1
2012-02-11	Feb	Summer 2011-12	birds	1	P22	Eskom	Chatworth	clear , cool	strong	100	86.7	Pipit Yellow-breasted	12	rare	no sign	grassland	10:30:00	late morning	0.5	absent	1
2012-02-11	Feb	Summer 2011-12	birds	1	P22	Eskom	Chatworth	clear , cool	strong	100	86.7	Quail Common	7	uncommon	breeding	grassland	10:30:00	late morning	0.5	absent	1
2012-02-11	Feb	Summer 2011-12	birds	1	P22	Eskom	Chatworth	clear , cool	strong	100	86.7	Quail Common	8	uncommon	breeding	grassland	10:30:00	late morning	0.5	absent	1
2012-02-11	Feb	Summer 2011-12	birds	1	P22	Eskom	Chatworth	clear , cool	strong	100	86.7	Swallow Barn	15	least concern	none breeder	aerial feeder	10:30:00	late morning	0.5	absent	1
2012-02-11	Feb	Summer 2011-12	birds	1	P22	Eskom	Chatworth	clear , cool	strong	100	86.7	Wheater Mountain	19	least concern	breeding	grassland	10:30:00	late morning	0.5	absent	1
2012-02-11	Feb	Summer 2011-12	birds	1	P22	Eskom	Chatworth	clear , cool	strong	100	86.7	Widowbird Long-tailed	11	least concern	breeding	grassland	10:30:00	late morning	0.5	absent	1
2012-02-11	Feb	Summer 2011-12	birds	1	P22	Eskom	Chatworth	clear , cool	strong	100	86.7	Widowbird Long-tailed	14	least concern	breeding	grassland	10:30:00	late morning	0.5	absent	1
2012-02-11	Feb	Summer 2011-12	vegetation	3	P22	Eskom	Chatworth	Partly cloudy, cool	strong	90	80	Chat Ant-eating				grassland			0.5
2012-02-11	Feb	Summer 2011-12	vegetation	3	P22	Eskom	Chatworth	Partly cloudy, cool	strong	90	80	Cisticola Wing-snapping				grassland			0.5
2012-02-11	Feb	Summer 2011-12	vegetation	3	P22	Eskom	Chatworth	Partly cloudy, cool	strong	90	80	Cisticola Zitting				grassland			0.5
2012-02-11	Feb	Summer 2011-12	vegetation	3	P22	Eskom	Chatworth	Partly cloudy, cool	strong	90	80	Lark Eastern Long-billed				grassland			0.5
2012-02-11	Feb	Summer 2011-12	vegetation	3	P22	Eskom	Chatworth	Partly cloudy, cool	strong	90	80	Longclaw Cape				grassland			0.5
2012-02-11	Feb	Summer 2011-12	vegetation	3	P22	Eskom	Chatworth	Partly cloudy, cool	strong	90	80	Pipit Yellow-breasted				grassland			0.5
2012-02-11	Feb	Summer 2011-12	vegetation	3	P22	Eskom	Chatworth	Partly cloudy, cool	strong	90	80	Quailfinch African				grassland			0.5
2012-02-13	Feb	Summer 2011-12	birds	2	P22	Eskom	Chatworth	clear, hot	calm	80	86.7	Cisticola Wing-snapping	1	least concern	no sign	grassland	15:00:00	mid-noon	0.5	absent	1
2012-02-13	Feb	Summer 2011-12	birds	2	P22	Eskom	Chatworth	clear, hot	calm	80	86.7	Cisticola Zitting	1	least concern	breeding	grassland	15:00:00	mid-noon	0.5	absent	1
2012-02-13	Feb	Summer 2011-12	birds	2	P22	Eskom	Chatworth	clear, hot	calm	80	86.7	Falcon Amur	1	uncommon	none breeder	grassland raptor	15:00:00	mid-noon	0.5	absent	1
2012-02-13	Feb	Summer 2011-12	birds	2	P22	Eskom	Chatworth	clear, hot	calm	80	86.7	Falcon Amur	1	uncommon	none breeder	grassland raptor	15:00:00	mid-noon	0.5	absent	1
2012-02-13	Feb	Summer 2011-12	birds	2	P22	Eskom	Chatworth	clear, hot	calm	80	86.7	Lark Eastern Long-billed	1	least concern	no sign	grassland	15:00:00	mid-noon	0.5	absent	1
2012-02-13	Feb	Summer 2011-12	birds	2	P22	Eskom	Chatworth	clear, hot	calm	80	86.7	Longclaw Cape	1	rare	no sign	grassland	15:00:00	mid-noon	0.5	absent	1
2012-02-13	Feb	Summer 2011-12	birds	2	P22	Eskom	Chatworth	clear, hot	calm	80	86.7	Martin Banded	1	least concern	none breeder	aerial feeder	15:00:00	mid-noon	0.5	absent	1
2012-02-13	Feb	Summer 2011-12	birds	2	P22	Eskom	Chatworth	clear, hot	calm	80	86.7	Pipit African	1	rare	no sign	grassland	15:00:00	mid-noon	0.5	absent	1
2012-02-13	Feb	Summer 2011-12	birds	2	P22	Eskom	Chatworth	clear, hot	calm	80	86.7	Quail Common	1	rare	breeding	grassland	15:00:00	mid-noon	0.5	absent	1
2010-07-13	July	Winter 2010	birds	1	P22	Eskom	Chatworth	cloudy, cool	moderate	85	83.3	Harrier Black	28	least concern	no sign	grassland	10:45:00	late morning	0.5	absent	1	0	1	0
2010-07-13	July	Winter 2010	birds	1	P22	Eskom	Chatworth	cloudy, cool	moderate	85	83.3	Longclaw Cape	15	rare	no sign	grassland	10:45:00	late morning	0.5	absent	1	0	1	0
2010-07-13	July	Winter 2010	birds	1	P22	Eskom	Chatworth	partly cloudy, cool	moderate	90	86.7	Thrush Sentinel Rock	6	least concern	no sign	grassland	10:45:00	late morning	0.5	absent	1	0	1	0
2010-07-13	July	Winter 2010	birds	1	P22	Eskom	Chatworth	partly cloudy, cool	moderate	90	86.7	Wheater Mountain	15	least concern	no sign	grassland	10:45:00	late morning	0.5	absent	1	0	1	0
2010-07-13	July	Winter 2010	birds	2	P22	Eskom	Chatworth	cloudy, cool	moderate	85	83.3	Cisticola Wing-snapping	8	least concern	no sign	grassland	10:45:00	late morning	0.5	absent	1	0	1	0
2010-07-26	July	Winter 2010	birds	2	P22	Eskom	Chatworth	partly cloudy, cool	moderate	90	86.7	Cisticola Wing-snapping	12	least concern	no sign	grassland	14:00:00	early noon	0.5	absent	1	0	1	0
2010-07-26	July	Winter 2010	birds	2	P22	Eskom	Chatworth	partly cloudy, cool	moderate	90	86.7	Lark Eastern Long-billed	3	least concern	no sign	grassland	14:00:00	early noon	0.5	absent	1	1	0	0
2010-07-26	July	Winter 2010	birds	2	P22	Eskom	Chatworth	partly cloudy, cool	moderate	90	86.7	Lark Eastern Long-billed	5	least concern	no sign	grassland	14:00:00	early noon	0.5	absent	1	0	1	0
2010-07-26	July	Winter 2010	birds	2	P22	Eskom	Chatworth	partly cloudy, cool	moderate	90	86.7	Longclaw Cape	15	rare	no sign	grassland	14:00:00	early noon	0.5	absent	1	0	1	0
2010-07-26	July	Winter 2010	birds	2	P22	Eskom	Chatworth	clear, cold	strong	75	70	Stonechat African	12	least concern	no sign	grassland	14:00:00	early noon	0.5	present	1	0	1	0
2010-07-26	July	Winter 2010	birds	2	P22	Eskom	Chatworth	partly cloudy, cool	strong	90	80	Thrush Sentinel Rock	3	least concern	no sign	grassland	14:00:00	early noon	0.5	present	1	0	1	0
2010-03-05	March	Autumn 2010	birds	1	P38	Eskom	Bedford	partly cloudy, cool	strong	90	80	Chat Ant-eating	1	least concern	no sign	grassland	14:13:00	early noon	0.25	absent	1	0	1	0
2010-03-05	March	Autumn 2010	birds	1	P38	Eskom	Bedford	partly cloudy, cool	strong	90	80	Cisticola Wing-snapping	1	least concern	no sign	grassland	14:13:00	early noon	0.25	absent	1	0	1	0
2010-03-05	March	Autumn 2010	birds	1	P38	Eskom	Bedford	partly cloudy, cool	strong	90	80	Crane Grey Crowned	7	least concern	no sign	wetland	14:13:00	early noon	0.25	absent	1	1	0	0
2010-03-05	March	Autumn 2010	birds	1	P38	Eskom	Bedford	partly cloudy, cool	strong	90	80	Heron Grey	2	least concern	no sign	marsh & wetlands	14:13:00	early noon	0.25	absent	1	0	1	0
2010-03-05	March	Autumn 2010	birds	1	P38	Eskom	Bedford	partly cloudy, cool	strong	90	80	Ibis Southern Bald	7	least concern	no sign	grassland	14:13:00	early noon	0.25	absent	1	0	1	0
2010-03-05	March	Autumn 2010	birds	1	P38	Eskom	Bedford	partly cloudy, cool	strong	90	80	Lapwing Crowned	14	least concern	no sign	grassland	14:13:00	early noon	0.25	absent	1	0	1	0
2010-03-05	March	Autumn 2010	birds	1	P38	Eskom	Bedford	clear, cold	moderate	75	76.7	Longclaw Cape	2	rare	no sign	grassland	14:13:00	early noon	0.25	present	1	0	1	0
2010-03-05	March	Autumn 2010	birds	1	P38	Eskom	Bedford	clear, cold	moderate	75	76.7	Martin Banded	1	least concern	no sign	aerial feeder	14:13:00	early noon	0.25	present	1	1	0	0
2010-03-05	March	Autumn 2010	birds	1	P38	Eskom	Bedford	clear, cold	moderate	75	76.7	Pipit African	14	rare	no sign	grassland	14:13:00	early noon	0.25	present	1	0	1	0
2010-03-05	March	Autumn 2010	birds	1	P38	Eskom	Bedford	clear, cold	moderate	75	76.7	Pipit Yellow-breasted	2	rare	no sign	grassland	14:13:00	early noon	0.25	present	1	0	1	0
2010-03-05	March	Autumn 2010	birds	1	P38	Eskom	Bedford	clear, cold	moderate	75	76.7	Starling Pied	7	least concern	no sign	grassland	14:13:00	early noon	0.25	present	1	0	1	0
2010-03-05	March	Autumn 2010	birds	1	P38	Eskom	Bedford	clear, cold	moderate	75	76.7	Widowbird Long-tailed	6	rare	no sign	grassland	14:13:00	early noon	0.25	present	1	0	1	0
2010-04-13	April	Autumn 2010	birds	2	P38	Eskom	Bedford	clear, hot	calm	80	86.7	Chat Ant-eating	25	least concern	no sign	grassland	10:05:00	late morning	0.25	present	1	0	1	0
2010-04-13	April	Autumn 2010	birds	2	P38	Eskom	Bedford	clear, hot	calm	80	86.7	Crow Cape	2	least concern	no sign	grassland	10:05:00	late morning	0.25	present	1	0	1	0
2010-04-13	April	Autumn 2010	birds	2	P38	Eskom	Bedford	clear, hot	calm	80	86.7	Longclaw Cape	2	rare	no sign	grassland	10:05:00	late morning	0.25	present	1	0	1	0
2010-04-13	April	Autumn 2010	birds	2	P38	Eskom	Bedford	clear, hot	calm	80	86.7	Martin Banded	1	least concern	no sign	aerial feeder	10:05:00	late morning	0.25	present	1	1	0	0
2010-04-13	April	Autumn 2010	birds	2	P38	Eskom	Bedford	clear, hot	calm	80	86.7	Secretarybird	4	least concern	no sign	grassland	10:05:00	late morning	0.25	present	1	0	1	0
2010-04-13	April	Autumn 2010	birds	2	P38	Eskom	Bedford	clear, hot	calm	80	86.7	Starling Pied	10	least concern	no sign	grassland	10:05:00	late morning	0.25	present	1	0	1	0
2010-04-13	April	Autumn 2010	birds	2	P38	Eskom	Bedford	clear, hot	calm	80	86.7	Swallow Barn	3	least concern	no sign	aerial feeder	10:05:00	late morning	0.25	present	1	1	0	0
2011-03-07	March	Autumn 2010-11	vegetation	3	P38	Eskom	Bedford					Canary Cape				scrub & forests			0.5
2011-03-07	March	Autumn 2010-11	vegetation	3	P38	Eskom	Bedford					Cisticola Wing-snapping				grassland			0.5
2011-03-07	March	Autumn 2010-11	vegetation	3	P38	Eskom	Bedford					Crane Grey Crowned				wetland			0.5
2011-03-07	March	Autumn 2010-11	vegetation	3	P38	Eskom	Bedford					Heron Black-headed				marsh & wetlands			0.5
2011-03-07	March	Autumn 2010-11	vegetation	3	P38	Eskom	Bedford					Ibis Southern Bald				grassland			0.5
2011-03-07	March	Autumn 2010-11	vegetation	3	P38	Eskom	Bedford					Longclaw Cape				grassland			0.5
2011-03-07	March	Autumn 2010-11	vegetation	3	P38	Eskom	Bedford					Pipit African				grassland			0.5
2011-03-07	March	Autumn 2011	birds	1	P38	Eskom	Bedford	partly cloudy, cool	moderate	90	86.7	Chat Ant-eating	24	least concern	no sign	grassland	09:30:00	late morning	0.5	absent	1	0	1	0
2011-03-07	March	Autumn 2011	birds	1	P38	Eskom	Bedford	partly cloudy, cool	moderate	90	86.7	Cisticola Wing-snapping	8	least concern	no sign	grassland	09:30:00	late morning	0.5	absent	1	0	1	0
2011-03-07	March	Autumn 2011	birds	1	P38	Eskom	Bedford	partly cloudy, cool	moderate	90	86.7	cliff-swallow South African	6	least concern	no sign	aerial feeder	09:30:00	late morning	0.5	absent	1	0	1	0
2011-03-07	March	Autumn 2011	birds	1	P38	Eskom	Bedford	partly cloudy, cool	moderate	90	86.7	Crane Grey Crowned	1	least concern	no sign	wetland	09:30:00	late morning	0.5	absent	1	0	1	0
2011-03-07	March	Autumn 2011	birds	1	P38	Eskom	Bedford	partly cloudy, cool	moderate	90	86.7	Crow Cape	8	least concern	no sign	grassland	09:30:00	late morning	0.5	absent	1	0	1	0
2011-03-07	March	Autumn 2011	birds	1	P38	Eskom	Bedford	partly cloudy, cool	moderate	90	86.7	Falcon Amur	22	rare	no sign	grassland raptor	09:30:00	late morning	0.5	absent	1	0	1	0
2011-03-07	March	Autumn 2011	birds	1	P38	Eskom	Bedford	partly cloudy, cool	moderate	90	86.7	Heron black-headed	1	least concern	no sign	waterbird	09:30:00	late morning	0.5	absent	1	0	1	0
2011-03-07	March	Autumn 2011	birds	1	P38	Eskom	Bedford	partly cloudy, cool	moderate	90	86.7	Ibis Southern Bald	4	least concern	no sign	grassland	09:30:00	late morning	0.5	absent	1	0	1	0
2011-03-07	March	Autumn 2011	birds	1	P38	Eskom	Bedford	partly cloudy, cool	moderate	90	86.7	Lark Eastern Long-billed	26	least concern	no sign	grassland	09:30:00	late morning	0.5	absent	1	0	1	0
2011-03-07	March	Autumn 2011	birds	1	P38	Eskom	Bedford	partly cloudy, cool	moderate	90	86.7	Lark Red-capped	9	rare	no sign	grassland	09:30:00	late morning	0.5	present	1	0	1	0
2011-03-07	March	Autumn 2011	birds	1	P38	Eskom	Bedford	partly cloudy, cool	moderate	90	86.7	Longclaw Cape	20	rare	no sign	grassland	09:30:00	late morning	0.5	present	1	0	1	0
2011-03-07	March	Autumn 2011	birds	1	P38	Eskom	Bedford	partly cloudy, cool	moderate	90	86.7	Martin Banded	25	least concern	no sign	aerial feeder	09:30:00	late morning	0.5	present	1	0	1	0
2011-03-07	March	Autumn 2011	birds	1	P38	Eskom	Bedford	partly cloudy, cool	moderate	90	86.7	Pipit African	26	rare	no sign	grassland	09:30:00	late morning	0.5	present	1	1	0	0
2011-03-07	March	Autumn 2011	birds	1	P38	Eskom	Bedford	partly cloudy, cool	moderate	90	86.7	Wheater Mountain	10	least concern	no sign	grassland	09:30:00	late morning	0.5	present	1	0	1	0
2011-03-07	March	Autumn 2011	birds	1	P38	Eskom	Bedford	partly cloudy, cool	moderate	90	86.7	Widowbird Long-tailed	14	rare	no sign	grassland	09:30:00	late morning	0.5	present	1	0	1	0
2011-03-15	March	Autumn 2011	birds	2	P38	Eskom	Bedford	cloudy, cool	moderate	85	83.3	Cisticola Wing-snapping	15	least concern	no sign	grassland	09:40:00	late morning	0.5	absent	1	0	1	0
2011-03-15	March	Autumn 2011	birds	2	P38	Eskom	Bedford	cloudy, cool	moderate	85	83.3	Crane Grey Crowned	7	least concern	no sign	wetland	09:40:00	late morning	0.5	absent	1	0	1	0
2011-03-15	March	Autumn 2011	birds	2	P38	Eskom	Bedford	cloudy, cool	moderate	85	83.3	Crow Cape	11	least concern	no sign	grassland	09:40:00	late morning	0.5	absent	1	0	1	0
2011-03-15	March	Autumn 2011	birds	2	P38	Eskom	Bedford	cloudy, cool	moderate	85	83.3	Ibis Southern Bald	5	least concern	no sign	grassland	09:40:00	late morning	0.5	present	1	0	1	0
2011-03-15	March	Autumn 2011	birds	2	P38	Eskom	Bedford	cloudy, cool	moderate	85	83.3	Lark Eastern Long-billed	10	least concern	no sign	grassland	09:40:00	late morning	0.5	present	1	1	0	0
2011-03-15	March	Autumn 2011	birds	2	P38	Eskom	Bedford	cloudy, cool	moderate	85	83.3	Lark Red-capped	8	rare	no sign	grassland	09:40:00	late morning	0.5	present	1	0	1	0
2011-03-15	March	Autumn 2011	birds	2	P38	Eskom	Bedford	cloudy, cool	moderate	85	83.3	Longclaw Cape	8	uncommon	no sign	grassland	09:40:00	late morning	0.5	present	1	0	1	0
2011-03-15	March	Autumn 2011	birds	2	P38	Eskom	Bedford	cloudy, cool	moderate	85	83.3	Longclaw Cape	6	uncommon	no sign	grassland	09:40:00	late morning	0.5	present	1	0	1	0
2011-03-15	March	Autumn 2011	birds	2	P38	Eskom	Bedford	cloudy, cool	moderate	85	83.3	Pipit African	24	rare	no sign	grassland	09:40:00	late morning	0.5	present	1	0	1	0
2011-03-15	March	Autumn 2011	birds	2	P38	Eskom	Bedford	partly cloudy, cool	moderate	90	86.7	Pipit Yellow-breasted	24	uncommon	no sign	grassland	09:40:00	late morning	0.5	absent	1	1	0	0
2011-03-15	March	Autumn 2011	birds	2	P38	Eskom	Bedford	partly cloudy, cool	moderate	90	86.7	Pipit Yellow-breasted	21	uncommon	no sign	grassland	09:40:00	late morning	0.5	absent	1	0	1	0
2011-03-15	March	Autumn 2011	birds	2	P38	Eskom	Bedford	partly cloudy, cool	moderate	90	86.7	Wagtail Cape	11	least concern	no sign	raptor	09:40:00	late morning	0.5	absent	1	1	0	0
2011-03-15	March	Autumn 2011	birds	2	P38	Eskom	Bedford	partly cloudy, cool	moderate	90	86.7	Widowbird Long-tailed	6	rare	no sign	grassland	09:40:00	late morning	0.5	absent	1	0	0	1
2010-10-19	October	Spring 2010	birds	1	P38	Eskom	Bedford	partly cloudy, cold	strong	65	63.3	Ibis Southern Bald	2	least concern	no sign	grassland	09:20:00	late morning	0.5	absent	1	0	0	1
2010-10-19	October	Spring 2010	birds	1	P38	Eskom	Bedford	partly cloudy, cold	strong	65	63.3	Lark Red-capped	1	common	no sign	grassland	09:20:00	late morning	0.5	absent	1	1	0	0
2010-10-19	October	Spring 2010	birds	1	P38	Eskom	Bedford	partly cloudy, cold	strong	65	63.3	Lark Red-capped	4	common	no sign	grassland	09:20:00	late morning	0.5	absent	1	0	0	1
2010-10-19	October	Spring 2010	birds	1	P38	Eskom	Bedford	partly cloudy, cool	moderate	90	86.7	Lark Red-capped	5	common	no sign	grassland	09:20:00	late morning	0.5	present	1	1	0	0
2010-10-19	October	Spring 2010	birds	1	P38	Eskom	Bedford	partly cloudy, cool	moderate	90	86.7	Lark Red-capped	25	common	no sign	grassland	09:20:00	late morning	0.5	present	1	0	0	1
2010-10-19	October	Spring 2010	birds	1	P38	Eskom	Bedford	partly cloudy, cool	moderate	90	86.7	Pipit African	10	uncommon	no sign	grassland	09:20:00	late morning	0.5	present	1	0	1	0
2010-10-19	October	Spring 2010	birds	1	P38	Eskom	Bedford	partly cloudy, cool	moderate	90	86.7	Pipit African	25	uncommon	no sign	grassland	09:20:00	late morning	0.5	present	1	0	0	1
2010-10-19	October	Spring 2010	birds	1	P38	Eskom	Bedford	partly cloudy, cool	moderate	90	86.7	Starling Pied	27	least concern	no sign	grassland	09:20:00	late morning	0.5	present	1	1	0	0
2010-10-19	October	Spring 2010	birds	1	P38	Eskom	Bedford	partly cloudy, cool	moderate	90	86.7	Widowbird Long-tailed	18	rare	no sign	grassland	09:20:00	late morning	0.5	present	1	1	0	0
2010-10-26	October	Spring 2010	birds	2	P38	Eskom	Bedford	cloudy, cool	calm	85	90	Cisticola Wing-snapping	30	least concern	no sign	grassland	08:25:00	mid-morning	0.5	present	1	0	1	0
2010-10-26	October	Spring 2010	birds	2	P38	Eskom	Bedford	cloudy, cool	calm	85	90	Crow Cape	8	least concern	no sign	grassland	08:25:00	mid-morning	0.5	present	1	0	0	1
2010-10-26	October	Spring 2010	birds	2	P38	Eskom	Bedford	cloudy, cool	calm	85	90	Egret cattle	2	least concern	no sign	grassland	08:25:00	mid-morning	0.5	present	1	0	0	1
2010-10-26	October	Spring 2010	birds	2	P38	Eskom	Bedford	cloudy, cool	calm	85	90	Ibis Hadeda	31	least concern	no sign	marsh & wetlands	08:25:00	mid-morning	0.5	present	1	0	0	1
2010-10-26	October	Spring 2010	birds	2	P38	Eskom	Bedford	cloudy, cool	calm	85	90	Ibis Southern Bald	1	least concern	no sign	grassland	08:25:00	mid-morning	0.5	present	1	0	0	1
2010-10-26	October	Spring 2010	birds	2	P38	Eskom	Bedford	cloudy, cool	calm	85	90	Lark Eastern Long-billed	20	least concern	no sign	grassland	08:25:00	mid-morning	0.5	present	1	0	1	0
2010-10-26	October	Spring 2010	birds	2	P38	Eskom	Bedford	cloudy, cool	calm	85	90	Lark Red-capped	2	abundant	no sign	grassland	08:25:00	mid-morning	0.5	present	1	0	1	0
2010-10-26	October	Spring 2010	birds	2	P38	Eskom	Bedford	cloudy, cool	calm	85	90	Lark Red-capped	16	abundant	no sign	grassland	08:25:00	mid-morning	0.5	present	1	0	1	0
2010-10-26	October	Spring 2010	birds	2	P38	Eskom	Bedford	cloudy, cool	calm	85	90	Lark Red-capped	22	abundant	no sign	grassland	08:25:00	mid-morning	0.5	present	1	0	1	0
2010-10-26	October	Spring 2010	birds	2	P38	Eskom	Bedford	cloudy, cool	calm	85	90	Lark Red-capped	25	abundant	no sign	grassland	08:25:00	mid-morning	0.5	present	1	0	1	0
2010-10-26	October	Spring 2010	birds	2	P38	Eskom	Bedford	cloudy, cool	calm	85	90	Lark Red-capped	26	abundant	no sign	grassland	08:25:00	mid-morning	0.5	present	1	0	1	0
2010-10-26	October	Spring 2010	birds	2	P38	Eskom	Bedford	cloudy, cool	calm	85	90	Lark Red-capped	29	abundant	no sign	grassland	08:25:00	mid-morning	0.5	present	1	1	0	0
2010-10-26	October	Spring 2010	birds	2	P38	Eskom	Bedford	cloudy, cool	calm	85	90	Longclaw Cape	11	uncommon	no sign	grassland	08:25:00	mid-morning	0.5	present	1	1	0	0
2010-10-26	October	Spring 2010	birds	2	P38	Eskom	Bedford	cloudy, cool	calm	85	90	Longclaw Cape	16	uncommon	no sign	grassland	08:25:00	mid-morning	0.5	present	1	0	1	0
2010-10-26	October	Spring 2010	birds	2	P38	Eskom	Bedford	cloudy, cool	calm	85	90	Martin Banded	20	least concern	no sign	aerial feeder	08:25:00	mid-morning	0.5	present	1	0	1	0
2010-10-26	October	Spring 2010	birds	2	P38	Eskom	Bedford	cloudy, cool	calm	85	90	Pipit African	2	abundant	no sign	grassland	08:25:00	mid-morning	0.5	present	1	0	0	1
2010-10-26	October	Spring 2010	birds	2	P38	Eskom	Bedford	cloudy, cool	calm	85	90	Pipit African	3	abundant	no sign	grassland	08:25:00	mid-morning	0.5	present	1	0	1	0
2010-10-26	October	Spring 2010	birds	2	P38	Eskom	Bedford	cloudy, cool	calm	85	90	Pipit African	9	abundant	no sign	grassland	08:25:00	mid-morning	0.5	present	1	0	1	0
2010-10-26	October	Spring 2010	birds	2	P38	Eskom	Bedford	cloudy, cool	calm	85	90	Pipit African	20	abundant	no sign	grassland	08:25:00	mid-morning	0.5	present	1	0	1	0
2010-10-26	October	Spring 2010	birds	2	P38	Eskom	Bedford	cloudy, cool	calm	85	90	Pipit African	26	abundant	no sign	grassland	08:25:00	mid-morning	0.5	present	1	1	0	0
2010-10-26	October	Spring 2010	birds	2	P38	Eskom	Bedford	cloudy, cool	calm	85	90	Pipit African	30	abundant	no sign	grassland	08:25:00	mid-morning	0.5	present	1	0	1	0
2010-10-26	October	Spring 2010	birds	2	P38	Eskom	Bedford	cloudy, cool	calm	85	90	Pipit Yellow-breasted	21	rare	no sign	grassland	08:25:00	mid-morning	0.5	present	1	0	1	0
2010-10-26	October	Spring 2010	birds	2	P38	Eskom	Bedford	cloudy, cool	calm	85	90	Quailfinch African	10	rare	no sign	grassland	08:25:00	mid-morning	0.5	present	1	0	1	0
2010-10-26	October	Spring 2010	birds	2	P38	Eskom	Bedford	cloudy, cool	calm	85	90	Starling Pied	1	least concern	no sign	grassland	08:25:00	mid-morning	0.5	present	1	0	1	0
2010-10-26	October	Spring 2010	birds	2	P38	Eskom	Bedford	cloudy, cool	calm	85	90	swift African Black	27	least concern	no sign	aerial feeder	08:25:00	mid-morning	0.5	present	1	0	1	0
2010-12-08	Dec	Summer 2010-11	birds	1	P38	Eskom	Bedford	partly cloudy, cool	moderate	90	86.7	Chat Ant-eating	19	least concern	no sign	grassland	10:30:00	late morning	0.5	absent	1	0	1	0
2010-12-08	Dec	Summer 2010-11	birds	1	P38	Eskom	Bedford	partly cloudy, cool	moderate	90	86.7	Cisticola Wing-snapping	1	least concern	no sign	grassland	10:30:00	late morning	0.5	absent	1	0	1	0
2010-12-08	Dec	Summer 2010-11	birds	1	P38	Eskom	Bedford	partly cloudy, cool	moderate	90	86.7	Crane Grey Crowned	27	least concern	no sign	wetland	10:30:00	late morning	0.5	absent	1	0	1	0
2010-12-08	Dec	Summer 2010-11	birds	1	P38	Eskom	Bedford	partly cloudy, cool	moderate	90	86.7	Ibis Hadeda	7	least concern	no sign	marsh & wetlands	10:30:00	late morning	0.5	absent	1	0	1	0
2010-12-08	Dec	Summer 2010-11	birds	1	P38	Eskom	Bedford	partly cloudy, cool	moderate	90	86.7	Lark Eastern Long-billed	18	least concern	no sign	grassland	10:30:00	late morning	0.5	absent	1	1	0	0
2010-12-08	Dec	Summer 2010-11	birds	1	P38	Eskom	Bedford	partly cloudy, cool	moderate	90	86.7	Lark Red-capped	1	abundant	no sign	grassland	10:30:00	late morning	0.5	absent	1	0	1	0
2010-12-08	Dec	Summer 2010-11	birds	1	P38	Eskom	Bedford	partly cloudy, cool	moderate	90	86.7	Lark Red-capped	3	abundant	no sign	grassland	10:30:00	late morning	0.5	absent	1	0	1	0
2010-12-08	Dec	Summer 2010-11	birds	1	P38	Eskom	Bedford	partly cloudy, cool	moderate	90	86.7	Lark Red-capped	6	abundant	no sign	grassland	10:30:00	late morning	0.5	absent	1	0	1	0
2010-12-08	Dec	Summer 2010-11	birds	1	P38	Eskom	Bedford	partly cloudy, cool	moderate	90	86.7	Lark Red-capped	17	abundant	no sign	grassland	10:30:00	late morning	0.5	absent	1	0	1	0
2010-12-08	Dec	Summer 2010-11	birds	1	P38	Eskom	Bedford	partly cloudy, cool	moderate	90	86.7	Lark Red-capped	23	abundant	no sign	grassland	10:30:00	late morning	0.5	absent	1	0	1	0
2010-12-08	Dec	Summer 2010-11	birds	1	P38	Eskom	Bedford	partly cloudy, cool	moderate	90	86.7	Longclaw Cape	3	uncommon	no sign	grassland	10:30:00	late morning	0.5	present	1	0	0	1
2010-12-08	Dec	Summer 2010-11	birds	1	P38	Eskom	Bedford	partly cloudy, cool	moderate	90	86.7	Longclaw Cape	18	uncommon	no sign	grassland	10:30:00	late morning	0.5	present	1	0	0	1
2010-12-08	Dec	Summer 2010-11	birds	1	P38	Eskom	Bedford	partly cloudy, cool	moderate	90	86.7	Martin Banded	21	least concern	no sign	aerial feeder	10:30:00	late morning	0.5	present	1	0	1	0
2010-12-08	Dec	Summer 2010-11	birds	1	P38	Eskom	Bedford	partly cloudy, cool	moderate	90	86.7	Pipit African	3	uncommon	no sign	grassland	10:30:00	late morning	0.5	present	1	0	1	0
2010-12-08	Dec	Summer 2010-11	birds	1	P38	Eskom	Bedford	partly cloudy, cool	moderate	90	86.7	Pipit African	6	uncommon	no sign	grassland	10:30:00	late morning	0.5	present	1	0	1	0
2010-12-08	Dec	Summer 2010-11	birds	1	P38	Eskom	Bedford	partly cloudy, cool	moderate	90	86.7	Pipit African	15	uncommon	no sign	grassland	10:30:00	late morning	0.5	present	1	0	1	0
2010-12-08	Dec	Summer 2010-11	birds	1	P38	Eskom	Bedford	partly cloudy, cool	moderate	90	86.7	Starling Pied	7	least concern	no sign	grassland	10:30:00	late morning	0.5	present	1	0	1	0
2010-12-08	Dec	Summer 2010-11	birds	1	P38	Eskom	Bedford	partly cloudy, cool	moderate	90	86.7	Swallow Barn	21	least concern	no sign	aerial feeder	10:30:00	late morning	0.5	present	1	0	1	0
2010-12-08	Dec	Summer 2010-11	birds	1	P38	Eskom	Bedford	partly cloudy, cool	moderate	90	86.7	Swallow Greater-striped	18	least concern	no sign	aerial feeder	10:30:00	late morning	0.5	present	1	1	0	0
2010-12-08	Dec	Summer 2010-11	vegetation	3	P38	Eskom	Bedford					Chat Ant-eating				grassland			0.5
2010-12-08	Dec	Summer 2010-11	vegetation	3	P38	Eskom	Bedford					Cisticola Wing-snapping				grassland			0.5
2010-12-08	Dec	Summer 2010-11	vegetation	3	P38	Eskom	Bedford					Cisticola Zitting				grassland			0.5
2010-12-08	Dec	Summer 2010-11	vegetation	3	P38	Eskom	Bedford					Crane Grey Crowned				wetland			0.5
2010-12-08	Dec	Summer 2010-11	vegetation	3	P38	Eskom	Bedford					Lark Eastern Long-billed				grassland			0.5
2010-12-08	Dec	Summer 2010-11	vegetation	3	P38	Eskom	Bedford					Lark Red-capped				grassland			0.5
2010-12-08	Dec	Summer 2010-11	vegetation	3	P38	Eskom	Bedford					Longclaw Cape				grassland			0.5
2010-12-08	Dec	Summer 2010-11	vegetation	3	P38	Eskom	Bedford					Pipit African				grassland			0.5
2010-12-08	Dec	Summer 2010-11	vegetation	3	P38	Eskom	Bedford					Pipit Yellow-breasted				grassland			0.5
2010-12-08	Dec	Summer 2010-11	vegetation	3	P38	Eskom	Bedford					Quail Common				grassland			0.5
2010-12-08	Dec	Summer 2010-11	vegetation	3	P38	Eskom	Bedford					Starling Pied				grassland			0.5
2010-12-08	Dec	Summer 2010-11	vegetation	3	P38	Eskom	Bedford					Swallow Barn				aerial feeder			0.5
2010-12-17	Dec	Summer 2010-11	birds	2	P38	Eskom	Bedford	clear , cool	strong	100	86.7	Chat Ant-eating	20	least concern	no sign	grassland	15:20:00	mid-noon	0.5	absent	1	0	1	0
2010-12-17	Dec	Summer 2010-11	birds	2	P38	Eskom	Bedford	clear , cool	strong	100	86.7	Crane Wattled	8	rare	no sign	wetland	15:20:00	mid-noon	0.5	absent	1	0	1	0
2010-12-17	Dec	Summer 2010-11	birds	2	P38	Eskom	Bedford	clear , cool	strong	100	86.7	Duck Yellow-billed	2	least concern	no sign	waterbird	15:20:00	mid-noon	0.5	absent	1	0	1	0
2010-12-17	Dec	Summer 2010-11	birds	2	P38	Eskom	Bedford	clear , cool	strong	100	86.7	Heron black-headed	2	least concern	no sign	waterbird	15:20:00	mid-noon	0.5	absent	1	0	1	0
2010-12-17	Dec	Summer 2010-11	birds	2	P38	Eskom	Bedford	clear , cool	strong	100	86.7	Heron grey	8	least concern	no sign	marsh & wetlands	15:20:00	mid-noon	0.5	absent	1	0	1	0
2010-12-17	Dec	Summer 2010-11	birds	2	P38	Eskom	Bedford	clear , cool	strong	100	86.7	Ibis Southern Bald	8	least concern	no sign	grassland	15:20:00	mid-noon	0.5	absent	1	0	1	0
2010-12-17	Dec	Summer 2010-11	birds	2	P38	Eskom	Bedford	clear , cool	strong	100	86.7	Lapwing Black-winged	21	least concern	no sign	grassland	15:20:00	mid-noon	0.5	absent	1	0	1	0
2010-12-17	Dec	Summer 2010-11	birds	2	P38	Eskom	Bedford	clear , cool	strong	100	86.7	Lark Red-capped	19	rare	no sign	grassland	15:20:00	mid-noon	0.5	absent	1	0	1	0
2010-12-17	Dec	Summer 2010-11	birds	2	P38	Eskom	Bedford	clear , cool	strong	100	86.7	Pipit African	8	uncommon	no sign	grassland	15:20:00	mid-noon	0.5	absent	1	0	1	0
2010-12-17	Dec	Summer 2010-11	birds	2	P38	Eskom	Bedford	clear , cool	strong	100	86.7	Pipit African	23	uncommon	no sign	grassland	15:20:00	mid-noon	0.5	absent	1	0	1	0
2010-12-17	Dec	Summer 2010-11	birds	2	P38	Eskom	Bedford	clear , cool	strong	100	86.7	Starling Pied	23	least concern	no sign	grassland	15:20:00	mid-noon	0.5	present	1	0	1	0
2010-12-17	Dec	Summer 2010-11	birds	2	P38	Eskom	Bedford	clear , cool	strong	100	86.7	Swallow Barn	3	least concern	no sign	aerial feeder	15:20:00	mid-noon	0.5	present	1	0	1	0
2010-12-17	Dec	Summer 2010-11	birds	2	P38	Eskom	Bedford	clear , cool	strong	100	86.7	Widowbird Long-tailed	8	rare	no sign	grassland	15:20:00	mid-noon	0.5	present	1	0	1	0
2011-11-17	Nov	Summer 2011-12	birds	1	P38	Eskom	Bedford	clear, hot	strong	80	73.3	Canary Cape	4	least concern	no sign	scrub & forests	17:00:00	late afternoon	0.5	absent	1
2011-11-17	Nov	Summer 2011-12	birds	1	P38	Eskom	Bedford	clear, hot	strong	80	73.3	Chat Ant-eating	8	least concern	no sign	grassland	17:00:00	late afternoon	0.5	absent	1
2011-11-17	Nov	Summer 2011-12	birds	1	P38	Eskom	Bedford	clear, hot	strong	80	73.3	Cisticola Cloud	1	least concern	no sign	grassland	17:00:00	late afternoon	0.5	absent	1
2011-11-17	Nov	Summer 2011-12	birds	1	P38	Eskom	Bedford	clear, hot	strong	80	73.3	Cisticola Zitting	1	least concern	no sign	grassland	17:00:00	late afternoon	0.5	absent	1
2011-11-17	Nov	Summer 2011-12	birds	1	P38	Eskom	Bedford	clear, hot	strong	80	73.3	Ibis Southern Bald	22	least concern	no sign	grassland	17:00:00	late afternoon	0.5	absent	1
2011-11-17	Nov	Summer 2011-12	birds	1	P38	Eskom	Bedford	clear, hot	strong	80	73.3	Lapwing Crowned	15	least concern	breeding	grassland	17:00:00	late afternoon	0.5	absent	1
2011-11-17	Nov	Summer 2011-12	birds	1	P38	Eskom	Bedford	clear, hot	strong	80	73.3	Lark Eastern Long-billed	12	least concern	no sign	grassland	17:00:00	late afternoon	0.5	absent	1
2011-11-17	Nov	Summer 2011-12	birds	1	P38	Eskom	Bedford	clear, hot	strong	80	73.3	Lark Red-capped	1	common	no sign	grassland	17:00:00	late afternoon	0.5	absent	1
2011-11-17	Nov	Summer 2011-12	birds	1	P38	Eskom	Bedford	clear, hot	strong	80	73.3	Lark Red-capped	6	common	no sign	grassland	17:00:00	late afternoon	0.5	absent	1
2011-11-17	Nov	Summer 2011-12	birds	1	P38	Eskom	Bedford	clear, hot	strong	80	73.3	Lark Red-capped	8	common	no sign	grassland	17:00:00	late afternoon	0.5	absent	1
2011-11-17	Nov	Summer 2011-12	birds	1	P38	Eskom	Bedford	clear, hot	strong	80	73.3	Lark Red-capped	19	common	no sign	grassland	17:00:00	late afternoon	0.5	absent	1
2011-11-17	Nov	Summer 2011-12	birds	1	P38	Eskom	Bedford	clear, hot	strong	80	73.3	Martin Banded	10	least concern	no sign	aerial feeder	17:00:00	late afternoon	0.5	absent	1
2011-11-17	Nov	Summer 2011-12	birds	1	P38	Eskom	Bedford	clear, hot	strong	80	73.3	Pipit African	1	uncommon	no sign	grassland	17:00:00	late afternoon	0.5	absent	1
2011-11-17	Nov	Summer 2011-12	birds	1	P38	Eskom	Bedford	clear, hot	strong	80	73.3	Pipit African	19	uncommon	no sign	grassland	17:00:00	late afternoon	0.5	absent	1
2011-11-17	Nov	Summer 2011-12	birds	1	P38	Eskom	Bedford	clear, hot	strong	80	73.3	Pipit African	23	uncommon	no sign	grassland	17:00:00	late afternoon	0.5	absent	1
2011-11-17	Nov	Summer 2011-12	birds	1	P38	Eskom	Bedford	clear, hot	strong	80	73.3	Quail Common	2	uncommon	no sign	grassland	17:00:00	late afternoon	0.5	absent	1
2011-11-17	Nov	Summer 2011-12	birds	1	P38	Eskom	Bedford	clear, hot	strong	80	73.3	Quail Common	6	uncommon	no sign	grassland	17:00:00	late afternoon	0.5	absent	1
2011-11-17	Nov	Summer 2011-12	birds	1	P38	Eskom	Bedford	clear, hot	strong	80	73.3	Quail Common	18	uncommon	no sign	grassland	17:00:00	late afternoon	0.5	absent	1
2011-11-17	Nov	Summer 2011-12	vegetation	3	P38	Eskom	Bedford	clear, hot	strong	80	73.3	Bishop Southern-red				grassland			0.5
2011-11-17	Nov	Summer 2011-12	vegetation	3	P38	Eskom	Bedford	clear, hot	strong	80	73.3	Chat Ant-eating				grassland			0.5
2011-11-17	Nov	Summer 2011-12	vegetation	3	P38	Eskom	Bedford	clear, hot	strong	80	73.3	Cisticola Cloud				grassland			0.5
2011-11-17	Nov	Summer 2011-12	vegetation	3	P38	Eskom	Bedford	clear, hot	strong	80	73.3	Cisticola Zitting				grassland			0.5
2011-11-17	Nov	Summer 2011-12	vegetation	3	P38	Eskom	Bedford	clear, hot	strong	80	73.3	Lark Red-capped				grassland			0.5
2011-11-17	Nov	Summer 2011-12	vegetation	3	P38	Eskom	Bedford	clear, hot	strong	80	73.3	Longclaw Cape				grassland			0.5
2011-11-17	Nov	Summer 2011-12	vegetation	3	P38	Eskom	Bedford	clear, hot	strong	80	73.3	Pipit African				grassland			0.5
2011-11-17	Nov	Summer 2011-12	vegetation	3	P38	Eskom	Bedford	clear, hot	strong	80	73.3	Quail Common				grassland			0.5
2011-11-17	Nov	Summer 2011-12	vegetation	3	P38	Eskom	Bedford	clear, hot	strong	80	73.3	Weaver Cape				forest			0.5
2011-11-23	Nov	Summer 2011-12	birds	2	P38	Eskom	Bedford	partly cloudy, cool	strong	90	80	Canary Cape	6	least concern	no sign	scrub & forests	11:00:00	mid-morning	0.5	absent	1
2011-11-23	Nov	Summer 2011-12	birds	2	P38	Eskom	Bedford	partly cloudy, cool	strong	90	80	Cisticola Wing-snapping	10	least concern	no sign	grassland	11:00:00	mid-morning	0.5	absent	1
2011-11-23	Nov	Summer 2011-12	birds	2	P38	Eskom	Bedford	partly cloudy, cool	strong	90	80	Cisticola Zitting	1	least concern	no sign	grassland	11:00:00	mid-morning	0.5	absent	1
2011-11-23	Nov	Summer 2011-12	birds	2	P38	Eskom	Bedford	partly cloudy, cool	strong	90	80	Cisticola Zitting	1	least concern	no sign	grassland	11:00:00	mid-morning	0.5	absent	1
2011-11-23	Nov	Summer 2011-12	birds	2	P38	Eskom	Bedford	partly cloudy, cool	strong	90	80	Lark Red-capped	3	common	no sign	grassland	11:00:00	mid-morning	0.5	absent	1
2011-11-23	Nov	Summer 2011-12	birds	2	P38	Eskom	Bedford	partly cloudy, cool	strong	90	80	Lark Red-capped	4	common	no sign	grassland	11:00:00	mid-morning	0.5	absent	1
2011-11-23	Nov	Summer 2011-12	birds	2	P38	Eskom	Bedford	partly cloudy, cool	strong	90	80	Lark Red-capped	6	common	no sign	grassland	11:00:00	mid-morning	0.5	absent	1
2011-11-23	Nov	Summer 2011-12	birds	2	P38	Eskom	Bedford	partly cloudy, cool	strong	90	80	Lark Red-capped	18	common	no sign	grassland	11:00:00	mid-morning	0.5	absent	1
2011-11-23	Nov	Summer 2011-12	birds	2	P38	Eskom	Bedford	partly cloudy, cool	strong	90	80	Longclaw Cape	12	common	no sign	grassland	11:00:00	mid-morning	0.5	absent	1
2011-11-23	Nov	Summer 2011-12	birds	2	P38	Eskom	Bedford	partly cloudy, cool	strong	90	80	Martin Banded	5	least concern	no sign	aerial feeder	11:00:00	mid-morning	0.5	absent	1
2011-11-23	Nov	Summer 2011-12	birds	2	P38	Eskom	Bedford	partly cloudy, cool	strong	90	80	Pipit African	1	uncommon	no sign	grassland	11:00:00	mid-morning	0.5	absent	1
2011-11-23	Nov	Summer 2011-12	birds	2	P38	Eskom	Bedford	partly cloudy, cool	strong	90	80	Pipit African	3	uncommon	no sign	grassland	11:00:00	mid-morning	0.5	absent	1
2011-11-23	Nov	Summer 2011-12	birds	2	P38	Eskom	Bedford	partly cloudy, cool	strong	90	80	Pipit Yellow-breasted	24	uncommon	no sign	grassland	11:00:00	mid-morning	0.5	absent	1
2011-11-23	Nov	Summer 2011-12	birds	2	P38	Eskom	Bedford	partly cloudy, cool	strong	90	80	Quail Common	24	rare	no sign	grassland	11:00:00	mid-morning	0.5	absent	1
2011-11-23	Nov	Summer 2011-12	birds	2	P38	Eskom	Bedford	partly cloudy, cool	strong	90	80	Quailfinch African	24	rare	no sign	grassland	11:00:00	mid-morning	0.5	absent	1
2011-12-14	Dec	Summer 2011-12	birds	1	P38	Eskom	Bedford	cloudy, cool	moderate	85	83.3	Cisticola Wing-snapping	8	least concern	breeding	grassland	16:15:00	late-noon	0.5	present	1
2011-12-14	Dec	Summer 2011-12	birds	1	P38	Eskom	Bedford	cloudy, cool	moderate	85	83.3	Cisticola Zitting	4	least concern	breeding	grassland	16:15:00	late-noon	0.5	present	1
2011-12-14	Dec	Summer 2011-12	birds	1	P38	Eskom	Bedford	cloudy, cool	moderate	85	83.3	Falcon Lanner	1	least concern	none breeder	grassland raptor	16:15:00	late-noon	0.5	present	1
2011-12-14	Dec	Summer 2011-12	birds	1	P38	Eskom	Bedford	cloudy, cool	moderate	85	83.3	Harrier Montagu	26	least concern	none breeder	grassland	16:15:00	late-noon	0.5	present	1
2011-12-14	Dec	Summer 2011-12	birds	1	P38	Eskom	Bedford	cloudy, cool	moderate	85	83.3	Korhaan White-bellied	21	rare	no sign	grassland	16:15:00	late-noon	0.5	present	1
2011-12-14	Dec	Summer 2011-12	birds	1	P38	Eskom	Bedford	cloudy, cool	moderate	85	83.3	Lark Eastern Long-billed	10	least concern	no sign	grassland	16:15:00	late-noon	0.5	absent
2011-12-14	Dec	Summer 2011-12	birds	1	P38	Eskom	Bedford	cloudy, cool	moderate	85	83.3	Martin Banded	1	least concern	no sign	aerial feeder	16:15:00	late-noon	0.5	absent
2011-12-14	Dec	Summer 2011-12	birds	1	P38	Eskom	Bedford	cloudy, cool	moderate	85	83.3	Pipit African	2	common	breeding	grassland	16:15:00	late-noon	0.5	absent
2011-12-14	Dec	Summer 2011-12	birds	1	P38	Eskom	Bedford	cloudy, cool	moderate	85	83.3	Pipit African	16	common	breeding	grassland	16:15:00	late-noon	0.5	absent
2011-12-14	Dec	Summer 2011-12	birds	1	P38	Eskom	Bedford	cloudy, cool	moderate	85	83.3	Pipit Yellow-breasted	13	common	breeding	grassland	16:15:00	late-noon	0.5	present	1
2011-12-14	Dec	Summer 2011-12	birds	1	P38	Eskom	Bedford	cloudy, cool	moderate	85	83.3	Pipit Yellow-breasted	17	common	breeding	grassland	16:15:00	late-noon	0.5	present	1
2011-12-14	Dec	Summer 2011-12	birds	1	P38	Eskom	Bedford	cloudy, cool	moderate	85	83.3	Pipit Yellow-breasted	24	common	breeding	grassland	16:15:00	late-noon	0.5	present	1
2011-12-14	Dec	Summer 2011-12	birds	1	P38	Eskom	Bedford	cloudy, cool	moderate	85	83.3	Quail Common	15	uncommon	breeding	grassland	16:15:00	late-noon	0.5	present	1
2011-12-14	Dec	Summer 2011-12	birds	1	P38	Eskom	Bedford	cloudy, cool	moderate	85	83.3	Quail Common	21	uncommon	breeding	grassland	16:15:00	late-noon	0.5	present	1
2011-12-14	Dec	Summer 2011-12	birds	1	P38	Eskom	Bedford	cloudy, cool	moderate	85	83.3	Quail Common	24	uncommon	breeding	grassland	16:15:00	late-noon	0.5	present	1
2011-12-14	Dec	Summer 2011-12	birds	1	P38	Eskom	Bedford	cloudy, cool	moderate	85	83.3	Quailfinch African	9	rare	no sign	grassland	16:15:00	late-noon	0.5	present	1
2011-12-14	Dec	Summer 2011-12	birds	1	P38	Eskom	Bedford	cloudy, cool	moderate	85	83.3	Swallow Barn	26	least concern	none breeder	aerial feeder	16:15:00	late-noon	0.5	present	1
2011-12-14	Dec	Summer 2011-12	vegetation	3	P38	Eskom	Bedford	cloudy, cold	strong	60	60	Cisticola Cloud				grassland			0.5
2011-12-14	Dec	Summer 2011-12	vegetation	3	P38	Eskom	Bedford	cloudy, cold	strong	60	60	Cisticola Wing-snapping				grassland			0.5
2011-12-14	Dec	Summer 2011-12	vegetation	3	P38	Eskom	Bedford	cloudy, cold	strong	60	60	Cisticola Zitting				grassland			0.5
2011-12-14	Dec	Summer 2011-12	vegetation	3	P38	Eskom	Bedford	cloudy, cold	strong	60	60	Lark Eastern Long-billed				grassland			0.5
2011-12-14	Dec	Summer 2011-12	vegetation	3	P38	Eskom	Bedford	cloudy, cold	strong	60	60	Longclaw Cape				grassland			0.5
2011-12-14	Dec	Summer 2011-12	vegetation	3	P38	Eskom	Bedford	cloudy, cold	strong	60	60	Pipit African				grassland			0.5
2011-12-14	Dec	Summer 2011-12	vegetation	3	P38	Eskom	Bedford	cloudy, cold	strong	60	60	Pipit Yellow-breasted				grassland			0.5
2011-12-14	Dec	Summer 2011-12	vegetation	3	P38	Eskom	Bedford	cloudy, cold	strong	60	60	Quail Common				grassland			0.5
2011-12-14	Dec	Summer 2011-12	vegetation	3	P38	Eskom	Bedford	cloudy, cold	strong	60	60	Starling Pied				grassland			0.5
2011-12-16	Dec	Summer 2011-12	birds	2	P38	Eskom	Bedford	clear, hot	calm	80	86.7	Cisticola Wing-snapping	9	least concern	no sign	grassland	11:00:00	mid-day	0.5	absent	1
2011-12-16	Dec	Summer 2011-12	birds	2	P38	Eskom	Bedford	clear, hot	calm	80	86.7	Cisticola Zitting	1	least concern	no sign	grassland	11:00:00	mid-day	0.5	absent	1
2011-12-16	Dec	Summer 2011-12	birds	2	P38	Eskom	Bedford	clear, hot	calm	80	86.7	Lark Eastern Long-billed	3	least concern	no sign	grassland	11:00:00	mid-day	0.5	present	1
2011-12-16	Dec	Summer 2011-12	birds	2	P38	Eskom	Bedford	clear, hot	calm	80	86.7	Lark Red-capped	16	uncommon	no sign	grassland	11:00:00	mid-day	0.5	present	1
2011-12-16	Dec	Summer 2011-12	birds	2	P38	Eskom	Bedford	clear, hot	calm	80	86.7	Lark Red-capped	22	uncommon	no sign	grassland	11:00:00	mid-day	0.5	present	1
2011-12-16	Dec	Summer 2011-12	birds	2	P38	Eskom	Bedford	clear, hot	calm	80	86.7	Longclaw Cape	11	uncommon	no sign	grassland	11:00:00	mid-day	0.5	present	1
2011-12-16	Dec	Summer 2011-12	birds	2	P38	Eskom	Bedford	clear, hot	calm	80	86.7	Longclaw Cape	27	uncommon	no sign	grassland	11:00:00	mid-day	0.5	present	1
2011-12-16	Dec	Summer 2011-12	birds	2	P38	Eskom	Bedford	clear, hot	calm	80	86.7	Martin Banded	1	least concern	no sign	aerial feeder	11:00:00	mid-day	0.5	present	1
2011-12-16	Dec	Summer 2011-12	birds	2	P38	Eskom	Bedford	clear, hot	calm	80	86.7	Pipit African	21	uncommon	no sign	grassland	11:00:00	mid-day	0.5	absent
2011-12-16	Dec	Summer 2011-12	birds	2	P38	Eskom	Bedford	clear, hot	calm	80	86.7	Pipit African	6	uncommon	no sign	grassland	11:00:00	mid-day	0.5	present	1
2011-12-16	Dec	Summer 2011-12	birds	2	P38	Eskom	Bedford	clear, hot	calm	80	86.7	Pipit Yellow-breasted	2	rare	no sign	grassland	11:00:00	mid-day	0.5	absent
2011-12-16	Dec	Summer 2011-12	birds	2	P38	Eskom	Bedford	clear, hot	calm	80	86.7	Quail Common	21	uncommon	no sign	grassland	11:00:00	mid-day	0.5	absent
2011-12-16	Dec	Summer 2011-12	birds	2	P38	Eskom	Bedford	clear, hot	calm	80	86.7	Quail Common	27	uncommon	no sign	grassland	11:00:00	mid-day	0.5	absent
2011-12-16	Dec	Summer 2011-12	birds	2	P38	Eskom	Bedford	clear, hot	calm	80	86.7	Swallow Greater-striped	6	least concern	none breeder	aerial feeder	11:00:00	mid-day	0.5	absent
2012-01-11	Jan	Summer 2011-12	birds	1	P38	Eskom	Bedford	clear , hot	moderate	80	80	Chat Ant-eating	24	least concern	no sign	grassland	15:00:00	mid-noon	0.5	present	1
2012-01-11	Jan	Summer 2011-12	birds	1	P38	Eskom	Bedford	clear , hot	moderate	80	80	Cisticola Cloud	14	least concern	no sign	grassland	15:00:00	mid-noon	0.5	present	1
2012-01-11	Jan	Summer 2011-12	birds	1	P38	Eskom	Bedford	clear , hot	moderate	80	80	Cisticola Wing-snapping	3	least concern	no sign	grassland	15:00:00	mid-noon	0.5	present	1
2012-01-11	Jan	Summer 2011-12	birds	1	P38	Eskom	Bedford	clear , hot	moderate	80	80	Cisticola Zitting	15	least concern	no sign	grassland	15:00:00	mid-noon	0.5	present	1
2012-01-11	Jan	Summer 2011-12	birds	1	P38	Eskom	Bedford	clear , hot	moderate	80	80	Crane Wattled	10	least concern	no sign	wetland	15:00:00	mid-noon	0.5	present	1
2012-01-11	Jan	Summer 2011-12	birds	1	P38	Eskom	Bedford	clear , hot	moderate	80	80	Falcon Amur	22	uncommon	no sign	grassland raptor	15:00:00	mid-noon	0.5	present	1
2012-01-11	Jan	Summer 2011-12	birds	1	P38	Eskom	Bedford	clear , hot	moderate	80	80	Lark Eastern Long-billed	1	least concern	no sign	grassland	15:00:00	mid-noon	0.5	present	1
2012-01-11	Jan	Summer 2011-12	birds	1	P38	Eskom	Bedford	clear , hot	moderate	80	80	Lark Red-capped	6	uncommon	no sign	grassland	15:00:00	mid-noon	0.5	present	1
2012-01-11	Jan	Summer 2011-12	birds	1	P38	Eskom	Bedford	clear , hot	moderate	80	80	Lark Red-capped	12	uncommon	no sign	grassland	15:00:00	mid-noon	0.5	present	1
2012-01-11	Jan	Summer 2011-12	birds	1	P38	Eskom	Bedford	clear , hot	moderate	80	80	Longclaw Cape	2	common	no sign	grassland	15:00:00	mid-noon	0.5	present	1
2012-01-11	Jan	Summer 2011-12	birds	1	P38	Eskom	Bedford	clear , hot	moderate	80	80	Martin Banded	9	least concern	no sign	aerial feeder	15:00:00	mid-noon	0.5	present	1
2012-01-11	Jan	Summer 2011-12	birds	1	P38	Eskom	Bedford	clear , hot	moderate	80	80	Pipit African	5	abundant	no sign	grassland	15:00:00	mid-noon	0.5	present	1
2012-01-11	Jan	Summer 2011-12	birds	1	P38	Eskom	Bedford	clear , hot	moderate	80	80	Pipit Yellow-breasted	19	abundant	no sign	grassland	15:00:00	mid-noon	0.5	present	1
2012-01-11	Jan	Summer 2011-12	birds	1	P38	Eskom	Bedford	clear , hot	moderate	80	80	Quail Common	5	common	no sign	grassland	15:00:00	mid-noon	0.5	present	1
2012-01-11	Jan	Summer 2011-12	birds	1	P38	Eskom	Bedford	clear , hot	moderate	80	80	Quail Common	13	common	no sign	grassland	15:00:00	mid-noon	0.5	present	1
2012-01-11	Jan	Summer 2011-12	birds	1	P38	Eskom	Bedford	clear , hot	moderate	80	80	Quail Common	14	common	no sign	grassland	15:00:00	mid-noon	0.5	present	1
2012-01-11	Jan	Summer 2011-12	birds	1	P38	Eskom	Bedford	clear , hot	moderate	80	80	Quail Common	15	common	no sign	grassland	15:00:00	mid-noon	0.5	present	1
2012-01-11	Jan	Summer 2011-12	birds	1	P38	Eskom	Bedford	clear , hot	moderate	80	80	Quail Common	17	common	no sign	grassland	15:00:00	mid-noon	0.5	present	1
2012-01-11	Jan	Summer 2011-12	birds	1	P38	Eskom	Bedford	clear , hot	moderate	80	80	Quailfinch African	18	abundant	no sign	grassland	15:00:00	mid-noon	0.5	present	1
2012-01-11	Jan	Summer 2011-12	birds	1	P38	Eskom	Bedford	clear , hot	moderate	80	80	Secretarybird	10	least concern	no sign	grassland	15:00:00	mid-noon	0.5	present	1
2012-01-11	Jan	Summer 2011-12	birds	1	P38	Eskom	Bedford	clear , hot	moderate	80	80	Swallow Barn	25	least concern	no sign	aerial feeder	15:00:00	mid-noon	0.5	present	1
2012-01-11	Jan	Summer 2011-12	vegetation	3	P38	Eskom	Bedford	clear, hot	calm	80	86.7	Canary Cape				scrub & forests			0.5
2012-01-11	Jan	Summer 2011-12	vegetation	3	P38	Eskom	Bedford	clear, hot	calm	80	86.7	Cisticola Cloud				grassland			0.5
2012-01-11	Jan	Summer 2011-12	vegetation	3	P38	Eskom	Bedford	clear, hot	calm	80	86.7	Cisticola Cloud				grassland			0.5
2012-01-11	Jan	Summer 2011-12	vegetation	3	P38	Eskom	Bedford	clear, hot	calm	80	86.7	Cisticola Wing-snapping				grassland			0.5
2012-01-11	Jan	Summer 2011-12	vegetation	3	P38	Eskom	Bedford	clear, hot	calm	80	86.7	Crane Blue				grassland			0.5
2012-01-11	Jan	Summer 2011-12	vegetation	3	P38	Eskom	Bedford	clear, hot	calm	80	86.7	Lark Eastern Long-billed				grassland			0.5
2012-01-11	Jan	Summer 2011-12	vegetation	3	P38	Eskom	Bedford	clear, hot	calm	80	86.7	Lark Red-capped				grassland			0.5
2012-01-11	Jan	Summer 2011-12	vegetation	3	P38	Eskom	Bedford	clear, hot	calm	80	86.7	Pipit African				grassland			0.5
2012-01-11	Jan	Summer 2011-12	vegetation	3	P38	Eskom	Bedford	clear, hot	calm	80	86.7	Pipit Yellow-breasted				grassland			0.5
2012-01-11	Jan	Summer 2011-12	vegetation	3	P38	Eskom	Bedford	clear, hot	calm	80	86.7	Quail Common				grassland			0.5
2012-01-11	Jan	Summer 2011-12	vegetation	3	P38	Eskom	Bedford	clear, hot	calm	80	86.7	Swallow Barn				aerial feeder			0.5
2012-01-11	Jan	Summer 2011-12	vegetation	3	P38	Eskom	Bedford	clear, hot	calm	80	86.7	Swallow Greater-striped				aerial feeder			0.5
2012-01-11	Jan	Summer 2011-12	vegetation	3	P38	Eskom	Bedford	clear, hot	calm	80	86.7	Widowbird Long-tailed				grassland			0.5
2012-01-15	Jan	Summer 2011-12	birds	2	P38	Eskom	Bedford	partly cloudy, cool	moderate	90	86.7	Cisticola Cloud	3	least concern	no sign	grassland	09:00:00	late morning	0.5	absent
2012-01-15	Jan	Summer 2011-12	birds	2	P38	Eskom	Bedford	partly cloudy, cool	moderate	90	86.7	Cisticola Wing-snapping	5	least concern	no sign	grassland	09:00:00	late morning	0.5	absent
2012-01-15	Jan	Summer 2011-12	birds	2	P38	Eskom	Bedford	partly cloudy, cool	moderate	90	86.7	Cisticola Wing-snapping	10	least concern	no sign	grassland	09:00:00	late morning	0.5	absent
2012-01-15	Jan	Summer 2011-12	birds	2	P38	Eskom	Bedford	partly cloudy, cool	moderate	90	86.7	Cisticola Wing-snapping	12	least concern	no sign	grassland	09:00:00	late morning	0.5	absent
2012-01-15	Jan	Summer 2011-12	birds	2	P38	Eskom	Bedford	partly cloudy, cool	moderate	90	86.7	Cisticola Zitting	18	least concern	no sign	grassland	09:00:00	late morning	0.5	absent
2012-01-15	Jan	Summer 2011-12	birds	2	P38	Eskom	Bedford	partly cloudy, cool	moderate	90	86.7	Crane Wattled	30	least concern	no sign	wetland	09:00:00	late morning	0.5	absent
2012-01-15	Jan	Summer 2011-12	birds	2	P38	Eskom	Bedford	partly cloudy, cool	moderate	90	86.7	Falcon Amur	1	uncommon	none breeder	grassland raptor	09:00:00	late morning	0.5	absent
2012-01-15	Jan	Summer 2011-12	birds	2	P38	Eskom	Bedford	partly cloudy, cool	moderate	90	86.7	Falcon Amur	12	uncommon	none breeder	grassland raptor	09:00:00	late morning	0.5	absent
2012-01-15	Jan	Summer 2011-12	birds	2	P38	Eskom	Bedford	partly cloudy, cool	moderate	90	86.7	Heron black-headed	1	least concern	none breeder	wetland	09:00:00	late morning	0.5	absent
2012-01-15	Jan	Summer 2011-12	birds	2	P38	Eskom	Bedford	partly cloudy, cool	moderate	90	86.7	Lark Eastern Long-billed	30	least concern	no sign	grassland	09:00:00	late morning	0.5	absent
2012-01-15	Jan	Summer 2011-12	birds	2	P38	Eskom	Bedford	partly cloudy, cool	moderate	90	86.7	Lark Red-capped	4	rare	no sign	grassland	09:00:00	late morning	0.5	absent
2012-01-15	Jan	Summer 2011-12	birds	2	P38	Eskom	Bedford	partly cloudy, cool	moderate	90	86.7	Longclaw Cape	1	common	breeding	grassland	09:00:00	late morning	0.5	absent
2012-01-15	Jan	Summer 2011-12	birds	2	P38	Eskom	Bedford	partly cloudy, cool	moderate	90	86.7	Longclaw Cape	12	common	breeding	grassland	09:00:00	late morning	0.5	absent
2012-01-15	Jan	Summer 2011-12	birds	2	P38	Eskom	Bedford	partly cloudy, cool	moderate	90	86.7	Longclaw Cape	23	common	breeding	grassland	09:00:00	late morning	0.5	absent
2012-01-15	Jan	Summer 2011-12	birds	2	P38	Eskom	Bedford	partly cloudy, cool	moderate	90	86.7	Longclaw Cape	24	common	breeding	grassland	09:00:00	late morning	0.5	absent
2012-01-15	Jan	Summer 2011-12	birds	2	P38	Eskom	Bedford	partly cloudy, cool	moderate	90	86.7	Pipit African	11	uncommon	no sign	grassland	09:00:00	late morning	0.5	absent
2012-01-15	Jan	Summer 2011-12	birds	2	P38	Eskom	Bedford	partly cloudy, cool	moderate	90	86.7	Pipit African	12	uncommon	no sign	grassland	09:00:00	late morning	0.5	absent
2012-01-15	Jan	Summer 2011-12	birds	2	P38	Eskom	Bedford	partly cloudy, cool	moderate	90	86.7	Pipit African	13	uncommon	no sign	grassland	09:00:00	late morning	0.5	absent
2012-01-15	Jan	Summer 2011-12	birds	2	P38	Eskom	Bedford	partly cloudy, cool	moderate	90	86.7	Pipit Yellow-breasted	4	uncommon	breeding	grassland	09:00:00	late morning	0.5	absent
2012-01-15	Jan	Summer 2011-12	birds	2	P38	Eskom	Bedford	partly cloudy, cool	moderate	90	86.7	Pipit Yellow-breasted	19	uncommon	breeding	grassland	09:00:00	late morning	0.5	absent
2012-01-15	Jan	Summer 2011-12	birds	2	P38	Eskom	Bedford	partly cloudy, cool	moderate	90	86.7	Quail Common	21	uncommon	no sign	grassland	09:00:00	late morning	0.5	absent
2012-01-15	Jan	Summer 2011-12	birds	2	P38	Eskom	Bedford	partly cloudy, cool	moderate	90	86.7	Quail Common	27	uncommon	no sign	grassland	09:00:00	late morning	0.5	absent
2012-01-15	Jan	Summer 2011-12	birds	2	P38	Eskom	Bedford	partly cloudy, cool	moderate	90	86.7	Starling Pied	2	least concern	no sign	grassland	09:00:00	late morning	0.5	absent
2012-01-15	Jan	Summer 2011-12	birds	2	P38	Eskom	Bedford	partly cloudy, cool	moderate	90	86.7	Swallow Barn	2	least concern	none breeder	aerial feeder	09:00:00	late morning	0.5	absent
2012-01-15	Jan	Summer 2011-12	birds	2	P38	Eskom	Bedford	partly cloudy, cool	moderate	90	86.7	Widowbird Long-tailed	6	uncommon	no sign	grassland	09:00:00	late morning	0.5	absent
2012-01-15	Jan	Summer 2011-12	birds	2	P38	Eskom	Bedford	partly cloudy, cool	moderate	90	86.7	Widowbird Long-tailed	12	uncommon	no sign	grassland	09:00:00	late morning	0.5	absent
2012-01-15	Jan	Summer 2011-12	birds	2	P38	Eskom	Bedford	partly cloudy, cool	moderate	90	86.7	Widowbird Long-tailed	14	uncommon	no sign	grassland	09:00:00	late morning	0.5	absent
2012-02-13	Feb	Summer 2011-12	birds	1	P38	Eskom	Bedford	clear, hot	calm	80	86.7	Cisticola Wing-snapping	1	least concern	breeding	grassland	10:00:00	late morning	0.5	absent	1
2012-02-13	Feb	Summer 2011-12	birds	1	P38	Eskom	Bedford	clear, hot	calm	80	86.7	Cisticola Zitting	1	least concern	breeding	grassland	10:00:00	late morning	0.5	absent	1
2012-02-13	Feb	Summer 2011-12	birds	1	P38	Eskom	Bedford	clear, hot	calm	80	86.7	cliff-swallow South African	18	least concern	aerial feeder	aerial feeder	10:00:00	late morning	0.5	absent	1
2012-02-13	Feb	Summer 2011-12	birds	1	P38	Eskom	Bedford	clear, hot	calm	80	86.7	Falcon Amur	29	rare	no sign	grassland raptor	10:00:00	late morning	0.5	absent	1
2012-02-13	Feb	Summer 2011-12	birds	1	P38	Eskom	Bedford	clear, hot	calm	80	86.7	Martin Banded	4	least concern	no sign	aerial feeder	10:00:00	late morning	0.5	absent	1
2012-02-13	Feb	Summer 2011-12	birds	1	P38	Eskom	Bedford	clear, hot	calm	80	86.7	Raven white-necked	1	least concern	none breeder	grassland	10:00:00	late morning	0.5	absent	1
2012-02-13	Feb	Summer 2011-12	birds	1	P38	Eskom	Bedford	clear, hot	calm	80	86.7	Swallow Barn	11	least concern	none breeder	aerial feeder	10:00:00	late morning	0.5	absent	1
2012-02-13	Feb	Summer 2011-12	birds	1	P38	Eskom	Bedford	clear, hot	calm	80	86.7	Swallow Greater-striped	2	least concern	none breeder	aerial feeder	10:00:00	late morning	0.5	absent	1
2012-02-13	Feb	Summer 2011-12	birds	1	P38	Eskom	Bedford	clear, hot	calm	80	86.7	Widowbird Long-tailed	15	common	no sign	grassland	10:00:00	late morning	0.5	absent	1
2012-02-13	Feb	Summer 2011-12	birds	1	P38	Eskom	Bedford	clear, hot	calm	80	86.7	Widowbird Long-tailed	16	common	no sign	grassland	10:00:00	late morning	0.5	absent	1
2012-02-13	Feb	Summer 2011-12	birds	1	P38	Eskom	Bedford	clear, hot	calm	80	86.7	Widowbird Long-tailed	21	common	no sign	grassland	10:00:00	late morning	0.5	absent	1
2012-02-13	Feb	Summer 2011-12	birds	1	P38	Eskom	Bedford	clear, hot	calm	80	86.7	Widowbird Long-tailed	26	common	no sign	grassland	10:00:00	late morning	0.5	absent	1
2012-02-13	Feb	Summer 2011-12	vegetation	3	P38	Eskom	Bedford	clear, hot	calm	80	86.7	Cisticola Wing-snapping				grassland			0.5
2012-02-13	Feb	Summer 2011-12	vegetation	3	P38	Eskom	Bedford	clear, hot	calm	80	86.7	Cisticola Zitting				grassland			0.5
2012-02-13	Feb	Summer 2011-12	vegetation	3	P38	Eskom	Bedford	clear, hot	calm	80	86.7	Raven White-necked				grassland			0.5
2012-02-13	Feb	Summer 2011-12	vegetation	3	P38	Eskom	Bedford	clear, hot	calm	80	86.7	Swallow Barn				aerial feeder			0.5
2012-02-13	Feb	Summer 2011-12	vegetation	3	P38	Eskom	Bedford	clear, hot	calm	80	86.7	Swallow-cliff South African				aerial feeder			0.5
2012-02-13	Feb	Summer 2011-12	vegetation	3	P38	Eskom	Bedford	clear, hot	calm	80	86.7	Widowbird Long-tailed				grassland			0.5
2012-02-15	Feb	Summer 2011-12	birds	2	P38	Eskom	Bedford	clear, hot	moderate	80	80	Bishop Southern Golden	1	least concern	no sign	grassland	15:40:00	mid-noon	0.5	absent	1
2012-02-15	Feb	Summer 2011-12	birds	2	P38	Eskom	Bedford	clear, hot	moderate	80	80	Cisticola Wing-snapping	1	least concern	breeding	grassland	15:40:00	mid-noon	0.5	absent	1
2012-02-15	Feb	Summer 2011-12	birds	2	P38	Eskom	Bedford	clear, hot	moderate	80	80	Cisticola Zitting	1	least concern	no sign	grassland	15:40:00	mid-noon	0.5	absent	1
2012-02-15	Feb	Summer 2011-12	birds	2	P38	Eskom	Bedford	clear, hot	moderate	80	80	Falcon Amur	1	rare	none breeder	grassland raptor	15:40:00	mid-noon	0.5	absent	1
2012-02-15	Feb	Summer 2011-12	birds	2	P38	Eskom	Bedford	clear, hot	moderate	80	80	Lapwing Wattled	1	least concern	no sign	grassland	15:40:00	mid-noon	0.5	absent	1
2012-02-15	Feb	Summer 2011-12	birds	2	P38	Eskom	Bedford	clear, hot	moderate	80	80	Longclaw Cape	1	rare	no sign	grassland	15:40:00	mid-noon	0.5	absent	1
2012-02-15	Feb	Summer 2011-12	birds	2	P38	Eskom	Bedford	clear, hot	moderate	80	80	Martin Banded	1	least concern	none breeder	aerial feeder	15:40:00	mid-noon	0.5	absent	1
2012-02-15	Feb	Summer 2011-12	birds	2	P38	Eskom	Bedford	clear, hot	moderate	80	80	Pipit African	1	rare	no sign	grassland	15:40:00	mid-noon	0.5	absent	1
2012-02-15	Feb	Summer 2011-12	birds	2	P38	Eskom	Bedford	clear, hot	moderate	80	80	Quail Common	1	rare	no sign	grassland	15:40:00	mid-noon	0.5	absent	1
2012-02-15	Feb	Summer 2011-12	birds	2	P38	Eskom	Bedford	clear, hot	moderate	80	80	Quailfinch African	1	rare	no sign	grassland	15:40:00	mid-noon	0.5	absent	1
2012-02-15	Feb	Summer 2011-12	birds	2	P38	Eskom	Bedford	clear, hot	moderate	80	80	Swallow White-throated	1	least concern	none breeder	aerial feeder	15:40:00	mid-noon	0.5	absent	1
2010-07-13	July	Winter 2010	birds	1	P38	Eskom	Bedford	cloudy, cool	moderate	85	83.3	Lark Eastern Long-billed	7	least concern	no sign	grassland	15:00:00	mid-noon	0.5	absent	1	0	1	0
2010-07-13	July	Winter 2010	birds	1	P38	Eskom	Bedford	cloudy, cool	moderate	85	83.3	Lark Eastern Long-billed	8	least concern	no sign	grassland	15:00:00	mid-noon	0.5	absent	1	0	1	0
2010-07-13	July	Winter 2010	birds	1	P38	Eskom	Bedford	partly cloudy, cool	moderate	90	86.7	Longclaw Cape	4	abundant	no sign	grassland	15:00:00	mid-noon	0.5	absent	1	0	1	0
2010-07-13	July	Winter 2010	birds	1	P38	Eskom	Bedford	partly cloudy, cool	moderate	90	86.7	Longclaw Cape	6	abundant	no sign	grassland	15:00:00	mid-noon	0.5	absent	1	0	1	0
2010-07-13	July	Winter 2010	birds	1	P38	Eskom	Bedford	partly cloudy, cool	moderate	90	86.7	Longclaw Cape	7	abundant	no sign	grassland	15:00:00	mid-noon	0.5	absent	1	0	1	0
2010-07-13	July	Winter 2010	birds	1	P38	Eskom	Bedford	partly cloudy, cool	moderate	90	86.7	Longclaw Cape	12	abundant	no sign	grassland	15:00:00	mid-noon	0.5	absent	1	0	1	0
2010-07-13	July	Winter 2010	birds	1	P38	Eskom	Bedford	partly cloudy, cool	moderate	90	86.7	Longclaw Cape	15	abundant	no sign	grassland	15:00:00	mid-noon	0.5	absent	1	0	1	0
2010-07-13	July	Winter 2010	birds	1	P38	Eskom	Bedford	partly cloudy, cool	moderate	90	86.7	Longclaw Cape	20	abundant	no sign	grassland	15:00:00	mid-noon	0.5	absent	1	0	1	0
2010-07-13	July	Winter 2010	birds	1	P38	Eskom	Bedford	partly cloudy, cool	moderate	90	86.7	Longclaw Cape	21	abundant	no sign	grassland	15:00:00	mid-noon	0.5	absent	1	0	1	0
2010-07-13	July	Winter 2010	birds	1	P38	Eskom	Bedford	partly cloudy, cool	moderate	90	86.7	Wheater Mountain	6	least concern	no sign	grassland	15:00:00	mid-noon	0.5	absent	1	0	1	0
2010-07-13	July	Winter 2010	birds	1	P38	Eskom	Bedford	partly cloudy, cool	moderate	90	86.7	Widowbird Long-tailed	10	rare	no sign	grassland	15:00:00	mid-noon	0.5	absent	1	0	1	0
2010-07-13	July	Winter 2010	birds	2	P38	Eskom	Bedford	cloudy, cool	moderate	85	83.3	Chat Ant-eating	12	least concern	no sign	grassland	15:00:00	mid-noon	0.5	absent	1	0	1	0
2010-07-13	July	Winter 2010	birds	2	P38	Eskom	Bedford	cloudy, cool	moderate	85	83.3	Cisticola Wing-snapping	4	least concern	no sign	grassland	15:00:00	mid-noon	0.5	absent	1	0	1	0
2010-07-13	July	Winter 2010	birds	2	P38	Eskom	Bedford	cloudy, cool	moderate	85	83.3	Crow Cape	2	least concern	no sign	grassland	15:00:00	mid-noon	0.5	absent	1	0	1	0
2010-07-26	July	Winter 2010	birds	2	P38	Eskom	Bedford	partly cloudy, cool	moderate	90	86.7	Ibis Southern Bald	6	least concern	no sign	grassland	10:30:00	late morning	0.5	absent	1	0	1	0
2010-07-26	July	Winter 2010	birds	2	P38	Eskom	Bedford	partly cloudy, cool	moderate	90	86.7	Lark Eastern Long-billed	2	least concern	no sign	grassland	10:30:00	late morning	0.5	absent	1	0	0	1
2010-07-26	July	Winter 2010	birds	2	P38	Eskom	Bedford	partly cloudy, cool	moderate	90	86.7	Lark Red-capped	2	rare	no sign	grassland	10:30:00	late morning	0.5	absent	1	0	1	0
2010-07-26	July	Winter 2010	birds	2	P38	Eskom	Bedford	clear, cold	strong	75	70	Longclaw Cape	10	uncommon	no sign	grassland	10:30:00	late morning	0.5	present	1	0	1	0
2010-07-26	July	Winter 2010	birds	2	P38	Eskom	Bedford	partly cloudy, cool	moderate	90	86.7	Longclaw Cape	3	uncommon	no sign	grassland	10:30:00	late morning	0.5	absent	1	0	1	0
2010-07-26	July	Winter 2010	birds	2	P38	Eskom	Bedford	partly cloudy, cool	moderate	90	86.7	Longclaw Cape	6	uncommon	no sign	grassland	10:30:00	late morning	0.5	absent	1	0	1	0
2010-07-26	July	Winter 2010	birds	2	P38	Eskom	Bedford	partly cloudy, cool	strong	90	80	Stonechat African	12	least concern	no sign	grassland	10:30:00	late morning	0.5	present	1	0	1	0
2010-07-26	July	Winter 2010	birds	2	P38	Eskom	Bedford	partly cloudy, cool	strong	90	80	Stonechat African	13	least concern	no sign	grassland	10:30:00	late morning	0.5	present	1	0	0	1
2010-07-26	July	Winter 2010	birds	2	P38	Eskom	Bedford	partly cloudy, cool	strong	90	80	Wheater Mountain	10	least concern	no sign	grassland	10:30:00	late morning	0.5	present	1	0	1	0
2011-11-16	Nov	Summer 2011-12	birds	1	P39	Eskom	Boundary Slopes	clear , cool	strong	100	86.7	Bustard Denham's	24	least concern	no sign	aerial feeder	15:30:00	mid-afternoon	0.5	absent	1
2011-11-16	Nov	Summer 2011-12	birds	1	P39	Eskom	Boundary Slopes	clear , cool	strong	100	86.7	Canary Cape	24	least concern	no sign	scrub & forests	15:30:00	mid-afternoon	0.5	absent	1
2011-11-16	Nov	Summer 2011-12	birds	1	P39	Eskom	Boundary Slopes	clear , cool	strong	100	86.7	Cisticola Wing-snapping	1	least concern	no sign	grassland	15:30:00	mid-afternoon	0.5	absent	1
2011-11-16	Nov	Summer 2011-12	birds	1	P39	Eskom	Boundary Slopes	clear , cool	strong	100	86.7	Crow Cape	16	least concern	no sign	grassland	15:30:00	mid-afternoon	0.5	absent	1
2011-11-16	Nov	Summer 2011-12	birds	1	P39	Eskom	Boundary Slopes	clear , cool	strong	100	86.7	Longclaw Cape	10	rare	no sign	grassland	15:30:00	mid-afternoon	0.5	absent	1
2011-11-16	Nov	Summer 2011-12	birds	1	P39	Eskom	Boundary Slopes	clear , cool	strong	100	86.7	Martin Banded	1	least concern	no sign	aerial feeder	15:30:00	mid-afternoon	0.5	absent	1
2011-11-16	Nov	Summer 2011-12	birds	1	P39	Eskom	Boundary Slopes	clear , cool	strong	100	86.7	Pipit Yellow-breasted	15	rare	no sign	grassland	15:30:00	mid-afternoon	0.5	absent	1
2011-11-16	Nov	Summer 2011-12	birds	1	P39	Eskom	Boundary Slopes	clear , cool	strong	100	86.7	Swallow White-throated	20	least concern	no sign	aerial feeder	15:30:00	mid-afternoon	0.5	absent	1
2011-11-16	Nov	Summer 2011-12	birds	1	P39	Eskom	Boundary Slopes	clear , cool	strong	100	86.7	swift African Black	24	least concern	no sign	aerial feeder	15:30:00	mid-afternoon	0.5	absent	1
2011-11-16	Nov	Summer 2011-12	vegetation	3	P39	Eskom	Boundary Slopes	clear, cold	moderate	75	76.7	Cisticola Wing-snapping				grassland			0.5
2011-11-16	Nov	Summer 2011-12	vegetation	3	P39	Eskom	Boundary Slopes	clear, cold	moderate	75	76.7	Longclaw Cape				grassland			0.5
2011-11-16	Nov	Summer 2011-12	vegetation	3	P39	Eskom	Boundary Slopes	clear, cold	moderate	75	76.7	Martin Banded				aerial feeder			0.5
2011-11-16	Nov	Summer 2011-12	vegetation	3	P39	Eskom	Boundary Slopes	clear, cold	moderate	75	76.7	Pipit Yellow-breasted				grassland			0.5
2011-11-28	Nov	Summer 2011-12	birds	2	P39	Eskom	Boundary Slopes	cloudy, cool	moderate	85	83.3	Cisticola Wing-snapping	1	least concern	breeding	grassland	14:30:00	early noon	0.5	absent	1
2011-11-28	Nov	Summer 2011-12	birds	2	P39	Eskom	Boundary Slopes	cloudy, cool	moderate	85	83.3	Crane Grey Crowned	4	least concern	no sign	wetland	14:30:00	early noon	0.5	absent	1
2011-11-28	Nov	Summer 2011-12	birds	2	P39	Eskom	Boundary Slopes	cloudy, cool	moderate	85	83.3	Crow Cape	2	least concern	no sign	grassland	14:30:00	early noon	0.5	absent	1
2011-11-28	Nov	Summer 2011-12	birds	2	P39	Eskom	Boundary Slopes	cloudy, cool	moderate	85	83.3	Longclaw Cape	3	rare	no sign	grassland	14:30:00	early noon	0.5	absent	1
2011-11-28	Nov	Summer 2011-12	birds	2	P39	Eskom	Boundary Slopes	cloudy, cool	moderate	85	83.3	Quail Common	1	uncommon	no sign	grassland	14:30:00	early noon	0.5	absent	1
2011-11-28	Nov	Summer 2011-12	birds	2	P39	Eskom	Boundary Slopes	cloudy, cool	moderate	85	83.3	Quail Common	22	uncommon	no sign	grassland	14:30:00	early noon	0.5	absent	1
2011-11-28	Nov	Summer 2011-12	birds	2	P39	Eskom	Boundary Slopes	cloudy, cool	moderate	85	83.3	Quailfinch African	19	rare	no sign	grassland	14:30:00	early noon	0.5	absent	1
2011-11-28	Nov	Summer 2011-12	birds	2	P39	Eskom	Boundary Slopes	cloudy, cool	moderate	85	83.3	Swift Alpine	22	least concern	no sign	aerial feeder	14:30:00	early noon	0.5	absent	1
2011-12-19	Dec	Summer 2011-12	birds	1	P39	Eskom	Boundary Slopes	partly cloudy, cool	moderate	90	86.7	Cisticola Wing-snapping	1	least concern	no sign	grassland	15:00:00	mid-noon	0.5	absent
2011-12-19	Dec	Summer 2011-12	birds	1	P39	Eskom	Boundary Slopes	partly cloudy, cold	moderate	90	86.7	Cisticola Zitting	5	least concern	no sign	grassland	15:00:00	mid-noon	0.5	absent
2011-12-19	Dec	Summer 2011-12	birds	1	P39	Eskom	Boundary Slopes	partly cloudy, cold	moderate	90	86.7	Crow Cape	1	least concern	no sign	grassland	15:00:00	mid-noon	0.5	absent
2011-12-19	Dec	Summer 2011-12	birds	1	P39	Eskom	Boundary Slopes	partly cloudy, cold	moderate	90	86.7	Ibis Hadeda	11	least concern	no sign	marsh & wetlands	15:00:00	mid-noon	0.5	absent
2011-12-19	Dec	Summer 2011-12	birds	1	P39	Eskom	Boundary Slopes	partly cloudy, cold	moderate	90	86.7	Longclaw Cape	19	least concern	no sign	grassland	15:00:00	mid-noon	0.5	absent
2011-12-19	Dec	Summer 2011-12	birds	1	P39	Eskom	Boundary Slopes	partly cloudy, cold	moderate	90	86.7	Martin Banded	21	least concern	no sign	aerial feeder	15:00:00	mid-noon	0.5	absent
2011-12-19	Dec	Summer 2011-12	birds	1	P39	Eskom	Boundary Slopes	partly cloudy, cold	moderate	90	86.7	Pipit Yellow-breasted	7	uncommon	no sign	grassland	15:00:00	mid-noon	0.5	absent
2011-12-19	Dec	Summer 2011-12	birds	1	P39	Eskom	Boundary Slopes	partly cloudy, cold	moderate	90	86.7	Pipit Yellow-breasted	9	uncommon	no sign	grassland	15:00:00	mid-noon	0.5	absent
2011-12-19	Dec	Summer 2011-12	birds	1	P39	Eskom	Boundary Slopes	partly cloudy, cold	moderate	90	86.7	Pipit Yellow-breasted	11	uncommon	no sign	grassland	15:00:00	mid-noon	0.5	absent
2011-12-19	Dec	Summer 2011-12	birds	1	P39	Eskom	Boundary Slopes	partly cloudy, cool	moderate	90	86.7	Quail Common	3	rare	no sign	grassland	15:00:00	mid-noon	0.5	present	1
2011-12-19	Dec	Summer 2011-12	birds	1	P39	Eskom	Boundary Slopes	partly cloudy, cool	moderate	90	86.7	Swallow White-throated	6	least concern	no sign	aerial feeder	15:00:00	mid-noon	0.5	present	1
2011-12-19	Dec	Summer 2011-12	vegetation	3	P39	Eskom	Boundary Slopes	clear, hot	moderate	80	80	Cisticola Wing-snapping				grassland			0.5
2011-12-19	Dec	Summer 2011-12	vegetation	3	P39	Eskom	Boundary Slopes	clear, hot	moderate	80	80	Cisticola Zitting				grassland			0.5
2011-12-19	Dec	Summer 2011-12	vegetation	3	P39	Eskom	Boundary Slopes	clear, hot	moderate	80	80	Crow Cape				grassland			0.5
2011-12-19	Dec	Summer 2011-12	vegetation	3	P39	Eskom	Boundary Slopes	clear, hot	moderate	80	80	Ibis Hadeda				marsh & wetlands			0.5
2011-12-19	Dec	Summer 2011-12	vegetation	3	P39	Eskom	Boundary Slopes	clear, hot	moderate	80	80	Longclaw Cape				grassland			0.5
2011-12-19	Dec	Summer 2011-12	vegetation	3	P39	Eskom	Boundary Slopes	clear, hot	moderate	80	80	Martin Banded				aerial feeder			0.5
2011-12-19	Dec	Summer 2011-12	vegetation	3	P39	Eskom	Boundary Slopes	clear, hot	moderate	80	80	Pipit Yellow-breasted				grassland			0.5
2011-12-19	Dec	Summer 2011-12	vegetation	3	P39	Eskom	Boundary Slopes	clear, hot	moderate	80	80	Quail Common				grassland			0.5
2011-12-19	Dec	Summer 2011-12	vegetation	3	P39	Eskom	Boundary Slopes	clear, hot	moderate	80	80	Swallow White-throated				aerial feeder			0.5
2011-12-19	Dec	Summer 2011-12	vegetation	3	P39	Eskom	Boundary Slopes	clear, hot	moderate	80	80	Bustard Denham's				grassland
2011-12-20	Dec	Summer 2011-12	birds	2	P39	Eskom	Boundary Slopes	clear , cool	moderate	100	93.3	Bustard Denham's	13	rare	no sign	grassland	10:10:00	mid-morning	0.5	absent
2011-12-20	Dec	Summer 2011-12	birds	2	P39	Eskom	Boundary Slopes	clear , cool	moderate	100	93.3	Canary Cape	9	least concern	no sign	scrub & forests	10:10:00	early morning	0.5	present	1
2011-12-20	Dec	Summer 2011-12	birds	2	P39	Eskom	Boundary Slopes	clear , cool	moderate	100	93.3	Cisticola Wing-snapping	2	least concern	no sign	grassland	10:10:00	early morning	0.5	present	1
2011-12-20	Dec	Summer 2011-12	birds	2	P39	Eskom	Boundary Slopes	clear , cool	moderate	100	93.3	Crow Cape	10	least concern	no sign	grassland	10:10:00	early morning	0.5	absent	1
2011-12-20	Dec	Summer 2011-12	birds	2	P39	Eskom	Boundary Slopes	clear , cool	moderate	100	93.3	Longclaw Cape	1	rare	no sign	grassland	10:10:00	early morning	0.5	absent	1
2011-12-20	Dec	Summer 2011-12	birds	2	P39	Eskom	Boundary Slopes	clear , cool	moderate	100	93.3	Pipit African	4	common	no sign	grassland	10:10:00	early morning	0.5	absent	1
2011-12-20	Dec	Summer 2011-12	birds	2	P39	Eskom	Boundary Slopes	clear , cool	moderate	100	93.3	Pipit African	8	common	no sign	grassland	10:10:00	early morning	0.5	absent	1
2011-12-20	Dec	Summer 2011-12	birds	2	P39	Eskom	Boundary Slopes	clear , cool	moderate	100	93.3	Pipit Yellow-breasted	2	common	breeding	grassland	10:10:00	early morning	0.5	absent
2011-12-20	Dec	Summer 2011-12	birds	2	P39	Eskom	Boundary Slopes	clear , cool	moderate	100	93.3	Pipit Yellow-breasted	4	common	breeding	grassland	10:10:00	early morning	0.5	absent
2011-12-20	Dec	Summer 2011-12	birds	2	P39	Eskom	Boundary Slopes	clear , cool	moderate	100	93.3	Pipit Yellow-breasted	22	common	breeding	grassland	10:10:00	early morning	0.5	absent
2011-12-20	Dec	Summer 2011-12	birds	2	P39	Eskom	Boundary Slopes	clear , cool	moderate	100	93.3	Quail Common	9	rare	no sign	grassland	10:10:00	early morning	0.5	absent	1
2011-12-20	Dec	Summer 2011-12	birds	2	P39	Eskom	Boundary Slopes	clear , cool	moderate	100	93.3	Stork White	14	least concern	no sign	grassland	10:10:00	early morning	0.5	absent	1
2011-12-20	Dec	Summer 2011-12	birds	2	P39	Eskom	Boundary Slopes	clear , cool	moderate	100	93.3	Swallow Barn	6	least concern	breeding	aerial feeder	10:10:00	early morning	0.5	absent	1
2012-01-12	Jan	Summer 2011-12	birds	1	P39	Eskom	Boundary Slopes	clear , hot	calm	80	86.7	Cisticola Cloud	21	least concern	no sign	grassland	15:50:00	mid-noon	0.5	present	1
2012-01-12	Jan	Summer 2011-12	birds	1	P39	Eskom	Boundary Slopes	clear , hot	calm	80	86.7	Cisticola Wing-snapping	1	least concern	no sign	grassland	15:50:00	mid-noon	0.5	present	1
2012-01-12	Jan	Summer 2011-12	birds	1	P39	Eskom	Boundary Slopes	clear , hot	calm	80	86.7	Cisticola Wing-snapping	25	least concern	no sign	grassland	15:50:00	mid-noon	0.5	present	1
2012-01-12	Jan	Summer 2011-12	birds	1	P39	Eskom	Boundary Slopes	clear , hot	calm	80	86.7	Cisticola Zitting	25	least concern	no sign	grassland	15:50:00	mid-noon	0.5	present	1
2012-01-12	Jan	Summer 2011-12	birds	1	P39	Eskom	Boundary Slopes	clear , hot	calm	80	86.7	Eagle Martial	3	least concern	no sign	raptor	15:50:00	mid-noon	0.5	present	1
2012-01-12	Jan	Summer 2011-12	birds	1	P39	Eskom	Boundary Slopes	clear , hot	calm	80	86.7	Falcon Lanner	20	least concern	no sign	grassland raptor	15:50:00	mid-noon	0.5	present	1
2012-01-12	Jan	Summer 2011-12	birds	1	P39	Eskom	Boundary Slopes	clear , hot	calm	80	86.7	Francolin Red-winged	26	rare	no sign	grassland	15:50:00	mid-noon	0.5	present	1
2012-01-12	Jan	Summer 2011-12	birds	1	P39	Eskom	Boundary Slopes	clear , hot	calm	80	86.7	Longclaw Cape	25	uncommon	no sign	grassland	15:50:00	mid-noon	0.5	present	1
2012-01-12	Jan	Summer 2011-12	birds	1	P39	Eskom	Boundary Slopes	clear , hot	calm	80	86.7	Longclaw Cape	27	uncommon	no sign	grassland	15:50:00	mid-noon	0.5	present	1
2012-01-12	Jan	Summer 2011-12	birds	1	P39	Eskom	Boundary Slopes	clear , hot	calm	80	86.7	Pipit African	26	rare	no sign	grassland	15:50:00	mid-noon	0.5	present	1
2012-01-12	Jan	Summer 2011-12	birds	1	P39	Eskom	Boundary Slopes	clear , hot	calm	80	86.7	Pipit Yellow-breasted	8	common	breeding	grassland	15:50:00	mid-noon	0.5	absent	1
2012-01-12	Jan	Summer 2011-12	birds	1	P39	Eskom	Boundary Slopes	clear , hot	calm	80	86.7	Pipit Yellow-breasted	13	common	breeding	grassland	15:50:00	mid-noon	0.5	absent	1
2012-01-12	Jan	Summer 2011-12	birds	1	P39	Eskom	Boundary Slopes	clear , hot	calm	80	86.7	Pipit Yellow-breasted	17	common	breeding	grassland	15:50:00	mid-noon	0.5	absent	1
2012-01-12	Jan	Summer 2011-12	birds	1	P39	Eskom	Boundary Slopes	clear , hot	calm	80	86.7	Pipit Yellow-breasted	21	common	breeding	grassland	15:50:00	mid-noon	0.5	absent	1
2012-01-12	Jan	Summer 2011-12	birds	1	P39	Eskom	Boundary Slopes	clear , hot	calm	80	86.7	Pipit Yellow-breasted	4	common	breeding	grassland	15:50:00	mid-noon	0.5	absent	1
2012-01-12	Jan	Summer 2011-12	birds	1	P39	Eskom	Boundary Slopes	clear , hot	calm	80	86.7	Secretarybird	26	rare	breeding	grassland	15:50:00	mid-noon	0.5	absent
2012-01-12	Jan	Summer 2011-12	vegetation	3	P39	Eskom	Boundary Slopes	clear, hot	moderate	80	80	Cisticola Wing-snapping				grassland			0.5
2012-01-12	Jan	Summer 2011-12	vegetation	3	P39	Eskom	Boundary Slopes	clear, hot	moderate	80	80	Cisticola Zitting				grassland			0.5
2012-01-12	Jan	Summer 2011-12	vegetation	3	P39	Eskom	Boundary Slopes	clear, hot	moderate	80	80	Crow Cape				grassland			0.5
2012-01-12	Jan	Summer 2011-12	vegetation	3	P39	Eskom	Boundary Slopes	clear, hot	moderate	80	80	Longclaw Cape				grassland			0.5
2012-01-12	Jan	Summer 2011-12	vegetation	3	P39	Eskom	Boundary Slopes	clear, hot	moderate	80	80	Martin Banded				aerial feeder			0.5
2012-01-12	Jan	Summer 2011-12	vegetation	3	P39	Eskom	Boundary Slopes	clear, hot	moderate	80	80	Pipit Yellow-breasted				grassland			0.5
2012-01-12	Jan	Summer 2011-12	vegetation	3	P39	Eskom	Boundary Slopes	clear, hot	moderate	80	80	Secretarybird				grassland raptor
2012-01-12	Jan	Summer 2011-12	vegetation	3	P39	Eskom	Boundary Slopes	clear, hot	moderate	80	80	Swallow Barn				aerial feeder			0.5
2012-01-12	Jan	Summer 2011-12	vegetation	3	P39	Eskom	Boundary Slopes	clear, hot	moderate	80	80	Swift African				aerial feeder			0.5
2012-01-14	Jan	Summer 2011-12	birds	2	P39	Eskom	Boundary Slopes	misty, cool	moderate	75	76.7	Cisticola Wing-snapping	1	least concern	breeding	grassland	09:00:00	late morning	0.5	absent	1
2012-01-14	Jan	Summer 2011-12	birds	2	P39	Eskom	Boundary Slopes	misty, cool	moderate	75	76.7	Cisticola Zitting	12	least concern	breeding	grassland	09:00:00	late morning	0.5	absent	1
2012-01-14	Jan	Summer 2011-12	birds	2	P39	Eskom	Boundary Slopes	misty, cool	moderate	75	76.7	Crow Cape	7	least concern	breeding	grassland	09:00:00	late morning	0.5	absent	1
2012-01-14	Jan	Summer 2011-12	birds	2	P39	Eskom	Boundary Slopes	misty, cool	moderate	75	76.7	Francolin Red-winged	23	rare	breeding	grassland	09:00:00	late morning	0.5	absent	1
2012-01-14	Jan	Summer 2011-12	birds	2	P39	Eskom	Boundary Slopes	misty, cool	moderate	75	76.7	Lark Eastern Long-billed	9	least concern	breeding	grassland	09:00:00	late morning	0.5	absent	1
2012-01-14	Jan	Summer 2011-12	birds	2	P39	Eskom	Boundary Slopes	misty, cool	moderate	75	76.7	Longclaw Cape	1	rare	breeding	grassland	09:00:00	late morning	0.5	absent	1
2012-01-14	Jan	Summer 2011-12	birds	2	P39	Eskom	Boundary Slopes	misty, cool	moderate	75	76.7	Martin Banded	23	least concern	breeding	aerial feeder	09:00:00	late morning	0.5	absent	1
2012-01-14	Jan	Summer 2011-12	birds	2	P39	Eskom	Boundary Slopes	misty, cool	moderate	75	76.7	Pipit Yellow-breasted	1	common	breeding	grassland	09:00:00	late morning	0.5	absent	1
2012-01-14	Jan	Summer 2011-12	birds	2	P39	Eskom	Boundary Slopes	misty, cool	moderate	75	76.7	Pipit Yellow-breasted	3	common	breeding	grassland	09:00:00	late morning	0.5	absent	1
2012-01-14	Jan	Summer 2011-12	birds	2	P39	Eskom	Boundary Slopes	misty, cool	moderate	75	76.7	Pipit Yellow-breasted	7	common	breeding	grassland	09:00:00	late morning	0.5	absent	1
2012-01-14	Jan	Summer 2011-12	birds	2	P39	Eskom	Boundary Slopes	misty, cool	moderate	75	76.7	Pipit Yellow-breasted	13	common	breeding	grassland	09:00:00	late morning	0.5	absent	1
2012-01-14	Jan	Summer 2011-12	birds	2	P39	Eskom	Boundary Slopes	misty, cool	moderate	75	76.7	Quailfinch African	10	rare	breeding	grassland	09:00:00	late morning	0.5	absent	1
2012-01-14	Jan	Summer 2011-12	birds	2	P39	Eskom	Boundary Slopes	misty, cool	moderate	75	76.7	Widowbird Long-tailed	1	rare	breeding	grassland	09:00:00	late morning	0.5	absent	1
2012-02-12	Feb	Summer 2011-12	birds	1	P39	Eskom	Boundary Slopes	partly cloudy, cool	calm	90	93.3	Bustard Denham's	1	least concern	none breeder	grassland	08:30:00	mid-morning	0.5	absent	1
2012-02-12	Feb	Summer 2011-12	birds	1	P39	Eskom	Boundary Slopes	partly cloudy, cool	calm	90	93.3	Cisticola Wing-snapping	1	least concern	no sign	grassland	08:30:00	mid-morning	0.5	absent	1
2012-02-12	Feb	Summer 2011-12	birds	1	P39	Eskom	Boundary Slopes	partly cloudy, cool	calm	90	93.3	Cisticola Zitting	2	least concern	no sign	grassland	08:30:00	mid-morning	0.5	absent	1
2012-02-12	Feb	Summer 2011-12	birds	1	P39	Eskom	Boundary Slopes	partly cloudy, cool	calm	90	93.3	cliff-swallow South African	9	least concern	none breeder	aerial feeder	08:30:00	mid-morning	0.5	absent	1
2012-02-12	Feb	Summer 2011-12	birds	1	P39	Eskom	Boundary Slopes	partly cloudy, cool	calm	90	93.3	Crow Cape	7	least concern	none breeder	grassland	08:30:00	mid-morning	0.5	absent	1
2012-02-12	Feb	Summer 2011-12	birds	1	P39	Eskom	Boundary Slopes	partly cloudy, cool	calm	90	93.3	Falcon Amur	23	rare	none breeder	grassland raptor	08:30:00	mid-morning	0.5	absent	1
2012-02-12	Feb	Summer 2011-12	birds	1	P39	Eskom	Boundary Slopes	partly cloudy, cool	calm	90	93.3	Francolin Red-winged	15	rare	breeding	grassland	08:30:00	mid-morning	0.5	absent	1
2012-02-12	Feb	Summer 2011-12	birds	1	P39	Eskom	Boundary Slopes	partly cloudy, cool	calm	90	93.3	Longclaw Cape	11	rare	no sign	grassland	08:30:00	mid-morning	0.5	absent	1
2012-02-12	Feb	Summer 2011-12	birds	1	P39	Eskom	Boundary Slopes	partly cloudy, cool	calm	90	93.3	Martin Banded	2	least concern	no sign	aerial feeder	08:30:00	mid-morning	0.5	absent	1
2012-02-12	Feb	Summer 2011-12	birds	1	P39	Eskom	Boundary Slopes	partly cloudy, cool	calm	90	93.3	Pipit African	7	uncommon	no sign	grassland	08:30:00	mid-morning	0.5	absent	1
2012-02-12	Feb	Summer 2011-12	birds	1	P39	Eskom	Boundary Slopes	partly cloudy, cool	calm	90	93.3	Pipit African	23	uncommon	no sign	grassland	08:30:00	mid-morning	0.5	absent	1
2012-02-12	Feb	Summer 2011-12	birds	1	P39	Eskom	Boundary Slopes	partly cloudy, cool	calm	90	93.3	Pipit Yellow-breasted	21	uncommon	no sign	grassland	08:30:00	mid-morning	0.5	absent	1
2012-02-12	Feb	Summer 2011-12	birds	1	P39	Eskom	Boundary Slopes	partly cloudy, cool	calm	90	93.3	Swallow Barn	2	least concern	none breeder	aerial feeder	08:30:00	mid-morning	0.5	absent	1
2012-02-12	Feb	Summer 2011-12	birds	1	P39	Eskom	Boundary Slopes	partly cloudy, cool	calm	90	93.3	Swallow Greater-striped	4	least concern	none breeder	aerial feeder	08:30:00	mid-morning	0.5	absent	1
2012-02-12	Feb	Summer 2011-12	vegetation	3	P39	Eskom	Boundary Slopes	clear, hot	strong	80	73.3	Cisticola Wing-snapping				grassland			0.5
2012-02-12	Feb	Summer 2011-12	vegetation	3	P39	Eskom	Boundary Slopes	clear, hot	strong	80	73.3	Cisticola Zitting				grassland			0.5
2012-02-12	Feb	Summer 2011-12	vegetation	3	P39	Eskom	Boundary Slopes	clear, hot	strong	80	73.3	Crow Cape				grassland			0.5
2012-02-12	Feb	Summer 2011-12	vegetation	3	P39	Eskom	Boundary Slopes	clear, hot	strong	80	73.3	Francolin Red-winged				grassland			0.5
2012-02-12	Feb	Summer 2011-12	vegetation	3	P39	Eskom	Boundary Slopes	clear, hot	strong	80	73.3	Longclaw Cape				grassland			0.5
2012-02-12	Feb	Summer 2011-12	vegetation	3	P39	Eskom	Boundary Slopes	clear, hot	strong	80	73.3	Martin Banded				aerial feeder			0.5
2012-02-12	Feb	Summer 2011-12	vegetation	3	P39	Eskom	Boundary Slopes	clear, hot	strong	80	73.3	Pipit African				grassland			0.5
2012-02-12	Feb	Summer 2011-12	vegetation	3	P39	Eskom	Boundary Slopes	clear, hot	strong	80	73.3	Swallow Barn				aerial feeder			0.5
2012-02-12	Feb	Summer 2011-12	vegetation	3	P39	Eskom	Boundary Slopes	clear, hot	strong	80	73.3	Swallow-cliff South African				aerial feeder			0.5
2012-02-14	Feb	Summer 2011-12	birds	2	P39	Eskom	Boundary Slopes	clear, hot	moderate	80	80	Cisticola Wing-snapping	1	least concern	no sign	grassland	10:20:00	late morning	0.5	absent	1
2012-02-14	Feb	Summer 2011-12	birds	2	P39	Eskom	Boundary Slopes	clear, hot	moderate	80	80	Cisticola Zitting	10	least concern	breeding	grassland	10:20:00	late morning	0.5	absent	1
2012-02-14	Feb	Summer 2011-12	birds	2	P39	Eskom	Boundary Slopes	clear, hot	moderate	80	80	Longclaw Cape	28	rare	breeding	grassland	10:20:00	late morning	0.5	absent	1
2012-02-14	Feb	Summer 2011-12	birds	2	P39	Eskom	Boundary Slopes	clear, hot	moderate	80	80	Martin Banded	2	least concern	no sign	aerial feeder	10:20:00	late morning	0.5	absent	1
2012-02-14	Feb	Summer 2011-12	birds	2	P39	Eskom	Boundary Slopes	clear, hot	moderate	80	80	Pipit Yellow-breasted	3	uncommon	no sign	grassland	10:20:00	late morning	0.5	absent	1
2012-02-14	Feb	Summer 2011-12	birds	2	P39	Eskom	Boundary Slopes	clear, hot	moderate	80	80	Pipit Yellow-breasted	16	uncommon	no sign	grassland	10:20:00	late morning	0.5	absent	1
2012-02-14	Feb	Summer 2011-12	birds	2	P39	Eskom	Boundary Slopes	clear, hot	moderate	80	80	Pipit Yellow-breasted	18	uncommon	no sign	grassland	10:20:00	late morning	0.5	absent	1
2012-02-14	Feb	Summer 2011-12	birds	2	P39	Eskom	Boundary Slopes	clear, hot	moderate	80	80	Secretarybird	2	least concern	no sign	grassland	10:20:00	late morning	0.5	absent	1
2011-03-09	March	Autumn 2010-11	vegetation	3	P40	Eskom	Bedford					Cisticola Wing-snapping				grassland			0.5
2011-03-09	March	Autumn 2010-11	vegetation	3	P40	Eskom	Bedford					Longclaw Cape				grassland			0.5
2011-03-09	March	Autumn 2010-11	vegetation	3	P40	Eskom	Bedford					Martin Banded				aerial feeder			0.5
2011-03-09	March	Autumn 2010-11	vegetation	3	P40	Eskom	Bedford					Pipit Yellow-breasted				grassland			0.5
2011-03-09	March	Autumn 2010-11	vegetation	3	P40	Eskom	Bedford					Secretarybird				grassland			0.5
2011-03-09	March	Autumn 2011	birds	2	P40	Eskom	Bedford	partly cloudy, cool	moderate	90	86.7	Cisticola Wing-snapping	24	least concern	no sign	grassland	11:30:00	mid-day	0.5	absent	1	1	0	0
2011-03-09	March	Autumn 2011	birds	2	P40	Eskom	Bedford	partly cloudy, cool	moderate	90	86.7	Crane Wattled	6	least concern	no sign	wetland	11:30:00	mid-day	0.5	absent	1	0	1	0
2011-03-09	March	Autumn 2011	birds	2	P40	Eskom	Bedford	partly cloudy, cool	moderate	90	86.7	Falcon Amur	20	rare	no sign	grassland raptor	11:30:00	mid-day	0.5	absent	1	0	1	0
2011-03-09	March	Autumn 2011	birds	2	P40	Eskom	Bedford	partly cloudy, cool	moderate	90	86.7	Ibis Southern Bald	26	least concern	no sign	grassland	11:30:00	mid-day	0.5	absent	1	0	1	0
2011-03-09	March	Autumn 2011	birds	2	P40	Eskom	Bedford	partly cloudy, cool	moderate	90	86.7	Lark Red-capped	25	rare	no sign	grassland	11:30:00	mid-day	0.5	absent	1	0	1	0
2011-03-09	March	Autumn 2011	birds	2	P40	Eskom	Bedford	partly cloudy, cool	moderate	90	86.7	Longclaw Cape	17	uncommon	no sign	grassland	11:30:00	mid-day	0.5	present	1	1	0	0
2011-03-09	March	Autumn 2011	birds	2	P40	Eskom	Bedford	partly cloudy, cool	moderate	90	86.7	Longclaw Cape	16	uncommon	no sign	grassland	11:30:00	mid-day	0.5	present	1	1	0	0
2011-03-09	March	Autumn 2011	birds	2	P40	Eskom	Bedford	partly cloudy, cool	moderate	90	86.7	Martin Banded	4	least concern	no sign	aerial feeder	11:30:00	mid-day	0.5	present	1	0	1	0
2011-03-09	March	Autumn 2011	birds	2	P40	Eskom	Bedford	partly cloudy, cool	moderate	90	86.7	Pipit Yellow-breasted	1	common	no sign	grassland	11:30:00	mid-day	0.5	present	1	0	1	0
2011-03-09	March	Autumn 2011	birds	2	P40	Eskom	Bedford	partly cloudy, cool	moderate	90	86.7	Pipit Yellow-breasted	3	common	no sign	grassland	11:30:00	mid-day	0.5	present	1	0	1	0
2011-03-09	March	Autumn 2011	birds	2	P40	Eskom	Bedford	partly cloudy, cool	moderate	90	86.7	Pipit Yellow-breasted	6	common	no sign	grassland	11:30:00	mid-day	0.5	present	1	1	0	0
2011-03-09	March	Autumn 2011	birds	2	P40	Eskom	Bedford	partly cloudy, cool	moderate	90	86.7	Pipit Yellow-breasted	19	common	no sign	grassland	11:30:00	mid-day	0.5	present	1	1	0	0
2011-03-09	March	Autumn 2011	birds	2	P40	Eskom	Bedford	partly cloudy, cool	moderate	90	86.7	Quail Common	26	rare	no sign	grassland	11:30:00	mid-day	0.5	present	1	1	0	0
2011-03-09	March	Autumn 2011	birds	2	P40	Eskom	Bedford	partly cloudy, cool	moderate	90	86.7	Secretarybird	7	least concern	no sign	grassland	11:30:00	mid-day	0.5	present	1	0	1	0
2011-03-15	March	Autumn 2011	birds	2	P40	Eskom	Bedford	cloudy, cool	moderate	85	83.3	Bustard Denham's	18	least concern	no sign	grassland	10:40:00	late morning	0.5	absent	1	0	1	0
2011-03-15	March	Autumn 2011	birds	2	P40	Eskom	Bedford	cloudy, cool	moderate	85	83.3	Crow Cape	5	least concern	no sign	grassland	10:40:00	late morning	0.5	absent	1	0	0	1
2011-03-15	March	Autumn 2011	birds	2	P40	Eskom	Bedford	cloudy, cool	moderate	85	83.3	Lapwing Black-winged	22	least concern	no sign	grassland	10:40:00	late morning	0.5	present	1	0	1	0
2011-03-15	March	Autumn 2011	birds	2	P40	Eskom	Bedford	cloudy, cool	moderate	85	83.3	Lark Red-capped	2	rare	no sign	grassland	10:40:00	late morning	0.5	present	1	1	0	0
2011-03-15	March	Autumn 2011	birds	2	P40	Eskom	Bedford	cloudy, cool	moderate	85	83.3	Longclaw Cape	2	uncommon	no sign	grassland	10:40:00	late morning	0.5	present	1	0	1	0
2011-03-15	March	Autumn 2011	birds	2	P40	Eskom	Bedford	cloudy, cool	moderate	85	83.3	Longclaw Cape	14	uncommon	no sign	grassland	10:40:00	late morning	0.5	present	1	1	0	0
2011-03-15	March	Autumn 2011	birds	2	P40	Eskom	Bedford	cloudy, cool	moderate	85	83.3	Pipit African	21	rare	no sign	grassland	10:40:00	late morning	0.5	present	1	0	1	0
2011-03-15	March	Autumn 2011	birds	2	P40	Eskom	Bedford	partly cloudy, cool	moderate	90	86.7	Pipit Yellow-breasted	17	rare	no sign	grassland	10:40:00	late morning	0.5	absent	1	0	1	0
2011-03-15	March	Autumn 2011	birds	2	P40	Eskom	Bedford	partly cloudy, cool	moderate	90	86.7	Secretarybird	17	least concern	no sign	grassland	10:40:00	late morning	0.5	absent	1	0	0	1
2011-03-15	March	Autumn 2011	birds	2	P40	Eskom	Bedford	partly cloudy, cool	moderate	90	86.7	Starling Pied	21	least concern	no sign	grassland	10:40:00	late morning	0.5	absent	1	0	1	0
2010-10-19	October	Spring 2010	birds	1	P40	Eskom	Bedford	partly cloudy, cold	strong	65	63.3	Chat Ant-eating	2	least concern	no sign	grassland	10:15:00	late morning	0.5	absent	1	0	1	0
2010-10-19	October	Spring 2010	birds	1	P40	Eskom	Bedford	partly cloudy, cold	strong	65	63.3	Crow Cape	1	least concern	no sign	grassland	10:15:00	late morning	0.5	absent	1	1	0	0
2010-10-19	October	Spring 2010	birds	1	P40	Eskom	Bedford	partly cloudy, cool	moderate	90	86.7	Martin Banded	6	least concern	no sign	aerial feeder	10:15:00	late morning	0.5	present	1	0	0	1
2010-10-19	October	Spring 2010	birds	1	P40	Eskom	Bedford	partly cloudy, cool	moderate	90	86.7	Pipit African	5	uncommon	no sign	grassland	10:15:00	late morning	0.5	present	1	0	1	0
2010-10-19	October	Spring 2010	birds	1	P40	Eskom	Bedford	partly cloudy, cool	moderate	90	86.7	Pipit Yellow-breasted	3	uncommon	no sign	grassland	10:15:00	late morning	0.5	present	1	0	1	0
2010-10-19	October	Spring 2010	birds	1	P40	Eskom	Bedford	partly cloudy, cool	moderate	90	86.7	Pipit Yellow-breasted	4	uncommon	no sign	grassland	10:15:00	late morning	0.5	present	1	0	1	0
2010-10-26	October	Spring 2010	birds	2	P40	Eskom	Bedford	cloudy, cool	calm	85	90	Cisticola Cloud	22	least concern	no sign	grassland	08:25:00	mid-morning	0.5	present	1	0	1	0
2010-10-26	October	Spring 2010	birds	2	P40	Eskom	Bedford	cloudy, cool	calm	85	90	Crane Blue	28	least concern	no sign	grassland	08:25:00	mid-morning	0.5	present	1	1	0	0
2010-10-26	October	Spring 2010	birds	2	P40	Eskom	Bedford	cloudy, cool	calm	85	90	Lark Eastern Long-billed	1	least concern	no sign	grassland	08:25:00	mid-morning	0.5	present	1	0	1	0
2010-10-26	October	Spring 2010	birds	2	P40	Eskom	Bedford	cloudy, cool	calm	85	90	Lark Eastern Long-billed	17	least concern	no sign	grassland	08:25:00	mid-morning	0.5	present	1	0	1	0
2010-10-26	October	Spring 2010	birds	2	P40	Eskom	Bedford	cloudy, cool	calm	85	90	Lark Red-capped	16	least concern	no sign	grassland	08:25:00	mid-morning	0.5	present	1	0	1	0
2010-10-26	October	Spring 2010	birds	2	P40	Eskom	Bedford	cloudy, cool	calm	85	90	Longclaw Cape	2	uncommon	no sign	grassland	08:25:00	mid-morning	0.5	present	1	0	1	0
2010-10-26	October	Spring 2010	birds	2	P40	Eskom	Bedford	cloudy, cool	calm	85	90	Longclaw Cape	3	uncommon	no sign	grassland	08:25:00	mid-morning	0.5	present	1	0	0	1
2010-10-26	October	Spring 2010	birds	2	P40	Eskom	Bedford	cloudy, cool	calm	85	90	Martin Banded	7	least concern	no sign	aerial feeder	08:25:00	mid-morning	0.5	present	1	1	0	0
2010-10-26	October	Spring 2010	birds	2	P40	Eskom	Bedford	cloudy, cool	calm	85	90	Pipit African	3	uncommon	no sign	grassland	08:25:00	mid-morning	0.5	present	1	0	1	0
2010-10-26	October	Spring 2010	birds	2	P40	Eskom	Bedford	cloudy, cool	calm	85	90	Pipit African	4	uncommon	no sign	grassland	08:25:00	mid-morning	0.5	present	1	0	1	0
2010-10-26	October	Spring 2010	birds	2	P40	Eskom	Bedford	cloudy, cool	calm	85	90	Pipit African	23	uncommon	no sign	grassland	08:25:00	mid-morning	0.5	present	1	0	0	1
2010-10-26	October	Spring 2010	birds	2	P40	Eskom	Bedford	cloudy, cool	calm	85	90	Pipit Yellow-breasted	2	uncommon	no sign	grassland	08:25:00	mid-morning	0.5	present	1	0	1	0
2010-10-26	October	Spring 2010	birds	2	P40	Eskom	Bedford	cloudy, cool	calm	85	90	Secretarybird	4	least concern	no sign	grassland	08:25:00	mid-morning	0.5	present	1	0	1	0
2010-10-26	October	Spring 2010	birds	2	P40	Eskom	Bedford	cloudy, cool	calm	85	90	Starling Pied	3	least concern	no sign	grassland	08:25:00	mid-morning	0.5	present	1	0	1	0
2010-10-26	October	Spring 2010	birds	2	P40	Eskom	Bedford	cloudy, cool	calm	85	90	Wheater Mountain	16	least concern	no sign	grassland	08:25:00	mid-morning	0.5	present	1	0	1	0
2010-12-08	Dec	Summer 2010-11	birds	1	P40	Eskom	Bedford	partly cloudy, cool	moderate	90	86.7	Canary Cape	13	least concern	no sign	scrub & forests	14:50:00	early noon	0.5	absent	1	0	1	0
2010-12-08	Dec	Summer 2010-11	birds	1	P40	Eskom	Bedford	partly cloudy, cool	moderate	90	86.7	Chat Ant-eating	12	least concern	no sign	grassland	14:50:00	early noon	0.5	absent	1	0	1	0
2010-12-08	Dec	Summer 2010-11	birds	1	P40	Eskom	Bedford	partly cloudy, cool	moderate	90	86.7	Cisticola Wing-snapping	1	least concern	no sign	grassland	14:50:00	early noon	0.5	absent	1	0	1	0
2010-12-08	Dec	Summer 2010-11	birds	1	P40	Eskom	Bedford	partly cloudy, cool	moderate	90	86.7	Crow Cape	14	least concern	no sign	grassland	14:50:00	early noon	0.5	absent	1	0	1	0
2010-12-08	Dec	Summer 2010-11	birds	1	P40	Eskom	Bedford	partly cloudy, cool	moderate	90	86.7	Crow Pied	10	least concern	no sign	scavenger	14:50:00	early noon	0.5	absent	1	0	1	0
2010-12-08	Dec	Summer 2010-11	birds	1	P40	Eskom	Bedford	partly cloudy, cool	moderate	90	86.7	Lark Eastern Long-billed	1	least concern	no sign	grassland	14:50:00	early noon	0.5	absent	1	0	1	0
2010-12-08	Dec	Summer 2010-11	birds	1	P40	Eskom	Bedford	partly cloudy, cold	strong	65	63.3	Longclaw Cape	22	rare	no sign	grassland	14:50:00	early noon	0.5	present	1	0	0	1
2010-12-08	Dec	Summer 2010-11	birds	1	P40	Eskom	Bedford	partly cloudy, cold	strong	65	63.3	Martin Banded	2	least concern	no sign	aerial feeder	14:50:00	early noon	0.5	present	1	0	1	0
2010-12-08	Dec	Summer 2010-11	birds	1	P40	Eskom	Bedford	partly cloudy, cool	strong	90	80	Pipit African	2	common	no sign	grassland	14:50:00	early noon	0.5	present	1	0	1	0
2010-12-08	Dec	Summer 2010-11	birds	1	P40	Eskom	Bedford	partly cloudy, cool	strong	90	80	Pipit African	2	common	no sign	grassland	14:50:00	early noon	0.5	present	1	0	1	0
2010-12-08	Dec	Summer 2010-11	birds	1	P40	Eskom	Bedford	partly cloudy, cool	strong	90	80	Pipit African	14	common	no sign	grassland	14:50:00	early noon	0.5	present	1	0	1	0
2010-12-08	Dec	Summer 2010-11	birds	1	P40	Eskom	Bedford	partly cloudy, cool	strong	90	80	Pipit African	16	common	no sign	grassland	14:50:00	early noon	0.5	present	1	0	1	0
2010-12-08	Dec	Summer 2010-11	birds	1	P40	Eskom	Bedford	partly cloudy, cool	strong	90	80	Pipit African	22	common	no sign	grassland	14:50:00	early noon	0.5	present	1	0	1	0
2010-12-08	Dec	Summer 2010-11	vegetation	3	P40	Eskom	Bedford					Chat Ant-eating				grassland			0.5
2010-12-08	Dec	Summer 2010-11	vegetation	3	P40	Eskom	Bedford					Cisticola Wing-snapping				grassland			0.5
2010-12-08	Dec	Summer 2010-11	vegetation	3	P40	Eskom	Bedford					Lark Eastern Long-billed				grassland			0.5
2010-12-08	Dec	Summer 2010-11	vegetation	3	P40	Eskom	Bedford					Longclaw Cape				grassland			0.5
2010-12-08	Dec	Summer 2010-11	vegetation	3	P40	Eskom	Bedford					Martin Banded				aerial feeder			0.5
2010-12-08	Dec	Summer 2010-11	vegetation	3	P40	Eskom	Bedford					Pipit Yellow-breasted				grassland			0.5
2010-12-08	Dec	Summer 2010-11	vegetation	3	P40	Eskom	Bedford					Swallow Barn				aerial feeder			0.5
2010-12-17	Dec	Summer 2010-11	birds	2	P40	Eskom	Bedford	clear , cool	strong	100	86.7	Bishop Southern-red	22	least concern	no sign	grassland	10:00:00	late morning	0.5	absent	1	0	1	0
2010-12-17	Dec	Summer 2010-11	birds	2	P40	Eskom	Bedford	clear , cool	strong	100	86.7	Cisticola Cloud	7	least concern	no sign	grassland	10:00:00	late morning	0.5	absent	1	0	1	0
2010-12-17	Dec	Summer 2010-11	birds	2	P40	Eskom	Bedford	clear , cool	strong	100	86.7	Cisticola Wing-snapping	4	least concern	no sign	grassland	10:00:00	late morning	0.5	absent	1	0	1	0
2010-12-17	Dec	Summer 2010-11	birds	2	P40	Eskom	Bedford	clear , cool	strong	100	86.7	Cisticola Zitting	1	least concern	no sign	grassland	10:00:00	late morning	0.5	absent	1	0	1	0
2010-12-17	Dec	Summer 2010-11	birds	2	P40	Eskom	Bedford	clear , cool	strong	100	86.7	Crow Cape	1	least concern	no sign	grassland	10:00:00	late morning	0.5	absent	1	0	1	0
2010-12-17	Dec	Summer 2010-11	birds	2	P40	Eskom	Bedford	clear , cool	strong	100	86.7	Longclaw Cape	20	uncommon	no sign	grassland	10:00:00	late morning	0.5	absent	1	0	1	0
2010-12-17	Dec	Summer 2010-11	birds	2	P40	Eskom	Bedford	clear , cool	strong	100	86.7	Longclaw Cape	3	uncommon	no sign	grassland	10:00:00	late morning	0.5	absent	1	0	1	0
2010-12-17	Dec	Summer 2010-11	birds	2	P40	Eskom	Bedford	clear , cool	strong	100	86.7	Martin Banded	4	least concern	no sign	aerial feeder	10:00:00	late morning	0.5	absent	1	0	1	0
2010-12-17	Dec	Summer 2010-11	birds	2	P40	Eskom	Bedford	clear , cool	strong	100	86.7	Pipit African	4	uncommon	no sign	grassland	10:00:00	late morning	0.5	absent	1	0	1	0
2010-12-17	Dec	Summer 2010-11	birds	2	P40	Eskom	Bedford	clear , cool	strong	100	86.7	Pipit African	18	uncommon	no sign	grassland	10:00:00	late morning	0.5	absent	1	0	1	0
2010-12-17	Dec	Summer 2010-11	birds	2	P40	Eskom	Bedford	clear , cool	strong	100	86.7	Swallow Barn	1	least concern	no sign	aerial feeder	10:00:00	late morning	0.5	present	1	0	1	0
2010-12-17	Dec	Summer 2010-11	birds	2	P40	Eskom	Bedford	clear , cool	strong	100	86.7	Swallow White-throated	9	least concern	no sign	aerial feeder	10:00:00	late morning	0.5	present	1	0	1	0
2010-12-17	Dec	Summer 2010-11	birds	2	P40	Eskom	Bedford	clear , cool	strong	100	86.7	Swift Black	22	least concern	no sign	aerial feeder	10:00:00	late morning	0.5	present	1	0	1	0
2010-12-17	Dec	Summer 2010-11	birds	2	P40	Eskom	Bedford	clear , cool	strong	100	86.7	Widowbird Long-tailed	17	least concern	no sign	grassland	10:00:00	late morning	0.5	present	1	0	1	0
2011-11-16	Nov	Summer 2011-12	birds	1	P40	Eskom	Bedford	clear , cool	calm	100	100	Cisticola Wing-snapping	12	least concern	no sign	grassland	11:30:00	mid-day	0.5	absent	1
2011-11-16	Nov	Summer 2011-12	birds	1	P40	Eskom	Bedford	clear , cool	calm	100	100	Lark Eastern Long-billed	25	least concern	no sign	grassland	11:30:00	mid-day	0.5	absent	1
2011-11-16	Nov	Summer 2011-12	birds	1	P40	Eskom	Bedford	clear , cool	calm	100	100	Lark Red-capped	5	uncommon	no sign	grassland	11:30:00	mid-day	0.5	absent	1
2011-11-16	Nov	Summer 2011-12	birds	1	P40	Eskom	Bedford	clear , cool	calm	100	100	Lark Red-capped	8	uncommon	no sign	grassland	11:30:00	mid-day	0.5	absent	1
2011-11-16	Nov	Summer 2011-12	birds	1	P40	Eskom	Bedford	clear , cool	calm	100	100	Longclaw Cape	10	uncommon	no sign	grassland	11:30:00	mid-day	0.5	absent	1
2011-11-16	Nov	Summer 2011-12	birds	1	P40	Eskom	Bedford	clear , cool	calm	100	100	Longclaw Cape	24	uncommon	no sign	grassland	11:30:00	mid-day	0.5	absent	1
2011-11-16	Nov	Summer 2011-12	birds	1	P40	Eskom	Bedford	clear , cool	calm	100	100	Martin Banded	1	least concern	no sign	aerial feeder	11:30:00	mid-day	0.5	absent	1
2011-11-16	Nov	Summer 2011-12	birds	1	P40	Eskom	Bedford	clear , cool	calm	100	100	Pipit Yellow-breasted	24	rare	no sign	grassland	11:30:00	mid-day	0.5	absent	1
2011-11-16	Nov	Summer 2011-12	birds	1	P40	Eskom	Bedford	clear , cool	calm	100	100	Swallow Barn	1	least concern	no sign	aerial feeder	11:30:00	mid-day	0.5	absent	1
2011-11-16	Nov	Summer 2011-12	birds	1	P40	Eskom	Bedford	clear , cool	calm	100	100	Swallow Greater-striped	2	least concern	no sign	aerial feeder	11:30:00	mid-day	0.5	absent	1
2011-11-17	Nov	Summer 2011-12	vegetation	3	P40	Eskom	Bedford	clear, hot	strong	80	73.3	Crane Blue				grassland			0.5
2011-11-17	Nov	Summer 2011-12	vegetation	3	P40	Eskom	Bedford	clear, hot	strong	80	73.3	Martin Banded				aerial feeder			0.5
2011-11-17	Nov	Summer 2011-12	vegetation	3	P40	Eskom	Bedford	clear, hot	strong	80	73.3	Pipit African				grassland			0.5
2011-11-17	Nov	Summer 2011-12	vegetation	3	P40	Eskom	Bedford	clear, hot	strong	80	73.3	Pipit Yellow-breasted				grassland			0.5
2011-11-17	Nov	Summer 2011-12	vegetation	3	P40	Eskom	Bedford	clear, hot	strong	80	73.3	Quail Common				grassland			0.5
2011-11-17	Nov	Summer 2011-12	vegetation	3	P40	Eskom	Bedford	clear, hot	strong	80	73.3	Swallow Barn				aerial feeder			0.5
2011-11-17	Nov	Summer 2011-12	vegetation	3	P40	Eskom	Bedford	clear, hot	strong	80	73.3	Swift African				aerial feeder			0.5
2011-11-23	Nov	Summer 2011-12	birds	2	P40	Eskom	Bedford	partly cloudy, cool	strong	90	80	Cisticola Wing-snapping	14	common	no sign	grassland	15:00:00	late-afternoon	0.5	absent	1
2011-11-23	Nov	Summer 2011-12	birds	2	P40	Eskom	Bedford	partly cloudy, cool	strong	90	80	Cisticola Wing-snapping	16	common	no sign	grassland	15:00:00	late-afternoon	0.5	absent	1
2011-11-23	Nov	Summer 2011-12	birds	2	P40	Eskom	Bedford	partly cloudy, cool	strong	90	80	Cisticola Wing-snapping	22	common	no sign	grassland	15:00:00	late-afternoon	0.5	absent	1
2011-11-23	Nov	Summer 2011-12	birds	2	P40	Eskom	Bedford	partly cloudy, cool	strong	90	80	Lark Eastern Long-billed	3	least concern	no sign	grassland	15:00:00	late-afternoon	0.5	absent	1
2011-11-23	Nov	Summer 2011-12	birds	2	P40	Eskom	Bedford	partly cloudy, cool	strong	90	80	Lark Red-capped	9	common	no sign	grassland	15:00:00	late-afternoon	0.5	absent	1
2011-11-23	Nov	Summer 2011-12	birds	2	P40	Eskom	Bedford	partly cloudy, cool	strong	90	80	Lark Red-capped	12	common	no sign	grassland	15:00:00	late-afternoon	0.5	absent	1
2011-11-23	Nov	Summer 2011-12	birds	2	P40	Eskom	Bedford	partly cloudy, cool	strong	90	80	Longclaw Cape	8	common	no sign	grassland	15:00:00	late-afternoon	0.5	absent	1
2011-11-23	Nov	Summer 2011-12	birds	2	P40	Eskom	Bedford	partly cloudy, cool	strong	90	80	Longclaw Cape	9	common	no sign	grassland	15:00:00	late-afternoon	0.5	absent	1
2011-11-23	Nov	Summer 2011-12	birds	2	P40	Eskom	Bedford	partly cloudy, cool	strong	90	80	Longclaw Cape	11	common	no sign	grassland	15:00:00	late-afternoon	0.5	absent	1
2011-11-23	Nov	Summer 2011-12	birds	2	P40	Eskom	Bedford	partly cloudy, cool	strong	90	80	Martin Banded	6	common	no sign	aerial feeder	15:00:00	late-afternoon	0.5	absent	1
2011-11-23	Nov	Summer 2011-12	birds	2	P40	Eskom	Bedford	partly cloudy, cool	strong	90	80	Pipit Yellow-breasted	13	rare	no sign	grassland	15:00:00	late-afternoon	0.5	absent	1
2011-11-23	Nov	Summer 2011-12	birds	2	P40	Eskom	Bedford	partly cloudy, cool	strong	90	80	Pipit Yellow-breasted	17	rare	no sign	grassland	15:00:00	late-afternoon	0.5	absent	1
2011-11-23	Nov	Summer 2011-12	birds	2	P40	Eskom	Bedford	partly cloudy, cool	strong	90	80	Swallow Barn	19	common	no sign	aerial feeder	15:00:00	late-afternoon	0.5	absent	1
2011-11-23	Nov	Summer 2011-12	birds	2	P40	Eskom	Bedford	partly cloudy, cool	strong	90	80	Swallow Greater-striped	17	common	no sign	aerial feeder	15:00:00	late-afternoon	0.5	absent	1
2011-12-13	Dec	Summer 2011-12	birds	1	P40	Eskom	Bedford	clear, hot	calm	80	86.7	Cisticola Wing-snapping	12	least concern	no sign	grassland	15:15:00	mid-noon	0.5	absent	1
2011-12-13	Dec	Summer 2011-12	birds	1	P40	Eskom	Bedford	clear, hot	calm	80	86.7	Cisticola Zitting	1	least concern	no sign	grassland	15:15:00	mid-noon	0.5	absent	1
2011-12-13	Dec	Summer 2011-12	birds	1	P40	Eskom	Bedford	clear, hot	calm	80	86.7	Lark Eastern Long-billed	7	least concern	no sign	grassland	15:15:00	mid-noon	0.5	absent	1
2011-12-13	Dec	Summer 2011-12	birds	1	P40	Eskom	Bedford	clear, hot	calm	80	86.7	Longclaw Cape	21	rare	no sign	grassland	15:15:00	mid-noon	0.5	absent	1
2011-12-13	Dec	Summer 2011-12	birds	1	P40	Eskom	Bedford	clear, hot	calm	80	86.7	Martin Banded	1	least concern	none breeder	aerial feeder	15:15:00	mid-noon	0.5	absent	1
2011-12-13	Dec	Summer 2011-12	birds	1	P40	Eskom	Bedford	clear, hot	calm	80	86.7	Pipit Yellow-breasted	2	rare	no sign	grassland	15:15:00	mid-noon	0.5	absent	1
2011-12-13	Dec	Summer 2011-12	birds	1	P40	Eskom	Bedford	clear, hot	calm	80	86.7	Quail Common	16	rare	no sign	grassland	15:15:00	mid-noon	0.5	absent	1
2011-12-13	Dec	Summer 2011-12	birds	1	P40	Eskom	Bedford	clear, hot	calm	80	86.7	Quailfinch African	26	rare	no sign	grassland	15:15:00	mid-noon	0.5	absent	1
2011-12-13	Dec	Summer 2011-12	birds	1	P40	Eskom	Bedford	clear, hot	calm	80	86.7	Vulture Cape	23	least concern	none breeder	raptor	15:15:00	mid-noon	0.5	present	1
2011-12-19	Dec	Summer 2011-12	birds	2	P40	Eskom	Bedford	clear, hot	calm	80	86.7	Cisticola Wing-snapping	1	least concern		grassland	10:30:00	mid-morning	0.5	absent
2011-12-19	Dec	Summer 2011-12	birds	2	P40	Eskom	Bedford	clear, hot	calm	80	86.7	Pipit Yellow-breasted	1	uncommon		grassland	10:30:00	mid-morning	0.5	absent
2011-12-19	Dec	Summer 2011-12	birds	2	P40	Eskom	Bedford	clear, hot	calm	80	86.7	Pipit Yellow-breasted	8	uncommon		grassland	10:30:00	mid-morning	0.5	absent
2011-12-19	Dec	Summer 2011-12	birds	2	P40	Eskom	Bedford	clear, hot	calm	80	86.7	Cisticola Zitting	5	least concern		grassland	10:30:00	mid-morning	0.5	absent
2011-12-19	Dec	Summer 2011-12	birds	2	P40	Eskom	Bedford	clear, hot	calm	80	86.7	Cisticola Zitting	7	least concern		grassland	10:30:00	mid-morning	0.5	absent
2011-12-19	Dec	Summer 2011-12	birds	2	P40	Eskom	Bedford	clear, hot	calm	80	86.7	Cisticola Zitting	11	least concern		grassland	10:30:00	mid-morning	0.5	absent
2011-12-19	Dec	Summer 2011-12	birds	2	P40	Eskom	Bedford	clear, hot	calm	80	86.7	Quail Common	5	common		grassland	10:30:00	mid-morning	0.5	absent
2011-12-19	Dec	Summer 2011-12	birds	2	P40	Eskom	Bedford	clear, hot	calm	80	86.7	Quail Common	7	common		grassland	10:30:00	mid-morning	0.5	absent
2011-12-19	Dec	Summer 2011-12	birds	2	P40	Eskom	Bedford	clear, hot	calm	80	86.7	Quail Common	17	common		grassland	10:30:00	mid-morning	0.5	absent
2011-12-19	Dec	Summer 2011-12	birds	2	P40	Eskom	Bedford	clear, hot	calm	80	86.7	Longclaw Cape	7	rare		grassland	10:30:00	mid-morning	0.5	absent
2011-12-19	Dec	Summer 2011-12	vegetation	3	P40	Eskom	Bedford	clear, hot	moderate	80	80	Cisticola Cloud				grassland			0.5
2011-12-19	Dec	Summer 2011-12	vegetation	3	P40	Eskom	Bedford	clear, hot	moderate	80	80	Cisticola Wing-snapping				grassland			0.5
2011-12-19	Dec	Summer 2011-12	vegetation	3	P40	Eskom	Bedford	clear, hot	moderate	80	80	Cisticola Zitting				grassland			0.5
2011-12-19	Dec	Summer 2011-12	vegetation	3	P40	Eskom	Bedford	clear, hot	moderate	80	80	Crane Wattled				wetland			0.5
2011-12-19	Dec	Summer 2011-12	vegetation	3	P40	Eskom	Bedford	clear, hot	moderate	80	80	Longclaw Cape				grassland			0.5
2011-12-19	Dec	Summer 2011-12	vegetation	3	P40	Eskom	Bedford	clear, hot	moderate	80	80	Martin Banded				aerial feeder			0.5
2011-12-19	Dec	Summer 2011-12	vegetation	3	P40	Eskom	Bedford	clear, hot	moderate	80	80	Pipit Yellow-breasted				grassland			0.5
2011-12-19	Dec	Summer 2011-12	vegetation	3	P40	Eskom	Bedford	clear, hot	moderate	80	80	Quail Common				grassland			0.5
2011-12-19	Dec	Summer 2011-12	vegetation	3	P40	Eskom	Bedford	clear, hot	moderate	80	80	Quailfinch African				grassland			0.5
2011-12-19	Dec	Summer 2011-12	vegetation	3	P40	Eskom	Bedford	clear, hot	moderate	80	80	Swallow Barn				aerial feeder			0.5
2012-01-11	Jan	Summer 2011-12	vegetation	3	P40	Eskom	Bedford	clear, hot	calm	80	86.7	Cisticola Wing-snapping				grassland			0.5
2012-01-11	Jan	Summer 2011-12	vegetation	3	P40	Eskom	Bedford	clear, hot	calm	80	86.7	Cisticola Zitting				grassland			0.5
2012-01-11	Jan	Summer 2011-12	vegetation	3	P40	Eskom	Bedford	clear, hot	calm	80	86.7	Crane Blue				grassland			0.5
2012-01-11	Jan	Summer 2011-12	vegetation	3	P40	Eskom	Bedford	clear, hot	calm	80	86.7	Korhaan White-bellied				grassland			0.5
2012-01-11	Jan	Summer 2011-12	vegetation	3	P40	Eskom	Bedford	clear, hot	calm	80	86.7	Longclaw Cape				grassland			0.5
2012-01-11	Jan	Summer 2011-12	vegetation	3	P40	Eskom	Bedford	clear, hot	calm	80	86.7	Martin Banded				aerial feeder			0.5
2012-01-11	Jan	Summer 2011-12	vegetation	3	P40	Eskom	Bedford	clear, hot	calm	80	86.7	Pipit Yellow-breasted				grassland			0.5
2012-01-11	Jan	Summer 2011-12	vegetation	3	P40	Eskom	Bedford	clear, hot	calm	80	86.7	Quailfinch African				grassland			0.5
2012-01-11	Jan	Summer 2011-12	vegetation	3	P40	Eskom	Bedford	clear, hot	calm	80	86.7	Secretarybird				grassland raptor
2012-01-14	Jan	Summer 2011-12	birds	1	P40	Eskom	Bedford	clear, hot	moderate	80	80	Buzzard Steppe	25	least concern	none breeder	raptor	15:15:00	mid-noon	0.5	absent	1
2012-01-14	Jan	Summer 2011-12	birds	1	P40	Eskom	Bedford	clear, hot	moderate	80	80	Cisticola Wing-snapping	7	least concern	breeding	grassland	15:15:00	mid-noon	0.5	absent	1
2012-01-14	Jan	Summer 2011-12	birds	1	P40	Eskom	Bedford	clear, hot	moderate	80	80	Cisticola Zitting	18	least concern	no sign	grassland	15:15:00	mid-noon	0.5	absent	1
2012-01-14	Jan	Summer 2011-12	birds	1	P40	Eskom	Bedford	clear, hot	moderate	80	80	Crow Cape	19	least concern	none breeder	grassland	15:15:00	mid-noon	0.5	absent	1
2012-01-14	Jan	Summer 2011-12	birds	1	P40	Eskom	Bedford	clear, hot	moderate	80	80	Lark Red-capped	11	rare	no sign	grassland	15:15:00	mid-noon	0.5	absent	1
2012-01-14	Jan	Summer 2011-12	birds	1	P40	Eskom	Bedford	clear, hot	moderate	80	80	Longclaw Cape	7	uncommon	breeding	grassland	15:15:00	mid-noon	0.5	absent	1
2012-01-14	Jan	Summer 2011-12	birds	1	P40	Eskom	Bedford	clear, hot	moderate	80	80	Longclaw Cape	21	uncommon	breeding	grassland	15:15:00	mid-noon	0.5	absent	1
2012-01-14	Jan	Summer 2011-12	birds	1	P40	Eskom	Bedford	clear, hot	moderate	80	80	Martin Banded	17	least concern	aerial feeder	aerial feeder	15:15:00	mid-noon	0.5	absent	1
2012-01-14	Jan	Summer 2011-12	birds	1	P40	Eskom	Bedford	clear, hot	moderate	80	80	Pipit African	2	uncommon	breeding	grassland	15:15:00	mid-noon	0.5	absent	1
2012-01-14	Jan	Summer 2011-12	birds	1	P40	Eskom	Bedford	clear, hot	moderate	80	80	Pipit African	25	uncommon	breeding	grassland	15:15:00	mid-noon	0.5	absent	1
2012-01-14	Jan	Summer 2011-12	birds	1	P40	Eskom	Bedford	clear, hot	moderate	80	80	Pipit Yellow-breasted	23	uncommon	breeding	grassland	15:15:00	mid-noon	0.5	absent	1
2012-01-14	Jan	Summer 2011-12	birds	1	P40	Eskom	Bedford	clear, hot	moderate	80	80	Swallow Barn	27	least concern	no sign	aerial feeder	15:15:00	mid-noon	0.5	absent	1
2012-01-14	Jan	Summer 2011-12	birds	1	P40	Eskom	Bedford	clear, hot	moderate	80	80	Swallow Greater-striped	26	least concern	none breeder	aerial feeder	15:15:00	mid-noon	0.5	absent	1
2012-01-15	Jan	Summer 2011-12	birds	2	P40	Eskom	Bedford	partly cloudy, cool	moderate	90	86.7	Chat Ant-eating	23	least concern	no sign	grassland	10:00:00	late morning	0.5	absent
2012-01-15	Jan	Summer 2011-12	birds	2	P40	Eskom	Bedford	partly cloudy, cool	moderate	90	86.7	Cisticola Wing-snapping	2	least concern	no sign	grassland	10:00:00	late morning	0.5	absent
2012-01-15	Jan	Summer 2011-12	birds	2	P40	Eskom	Bedford	partly cloudy, cool	moderate	90	86.7	Cisticola Zitting	21	least concern	no sign	grassland	10:00:00	late morning	0.5	absent
2012-01-15	Jan	Summer 2011-12	birds	2	P40	Eskom	Bedford	partly cloudy, cool	moderate	90	86.7	Crow Cape	5	least concern	none breeder	grassland	10:00:00	late morning	0.5	absent
2012-01-15	Jan	Summer 2011-12	birds	2	P40	Eskom	Bedford	partly cloudy, cool	moderate	90	86.7	Falcon Amur	18	rare	none breeder	grassland raptor	10:00:00	late morning	0.5	absent
2012-01-15	Jan	Summer 2011-12	birds	2	P40	Eskom	Bedford	partly cloudy, cool	moderate	90	86.7	Korhaan White-bellied	7	least concern	no sign	grassland	10:00:00	late morning	0.5	absent
2012-01-15	Jan	Summer 2011-12	birds	2	P40	Eskom	Bedford	partly cloudy, cool	moderate	90	86.7	Lark Eastern Long-billed	1	least concern	no sign	grassland	10:00:00	late morning	0.5	absent
2012-01-15	Jan	Summer 2011-12	birds	2	P40	Eskom	Bedford	partly cloudy, cool	moderate	90	86.7	Lark Spike-heeled	10	least concern	no sign	grassland	10:00:00	late morning	0.5	absent
2012-01-15	Jan	Summer 2011-12	birds	2	P40	Eskom	Bedford	partly cloudy, cool	moderate	90	86.7	Longclaw Cape	1	uncommon	no sign	grassland	10:00:00	late morning	0.5	absent
2012-01-15	Jan	Summer 2011-12	birds	2	P40	Eskom	Bedford	partly cloudy, cool	moderate	90	86.7	Longclaw Cape	22	uncommon	no sign	grassland	10:00:00	late morning	0.5	absent
2012-01-15	Jan	Summer 2011-12	birds	2	P40	Eskom	Bedford	partly cloudy, cool	moderate	90	86.7	Martin Banded	1	least concern	no sign	aerial feeder	10:00:00	late morning	0.5	absent
2012-01-15	Jan	Summer 2011-12	birds	2	P40	Eskom	Bedford	partly cloudy, cool	moderate	90	86.7	Pipit African	1	uncommon	no sign	grassland	10:00:00	late morning	0.5	absent
2012-01-15	Jan	Summer 2011-12	birds	2	P40	Eskom	Bedford	partly cloudy, cool	moderate	90	86.7	Pipit African	3	uncommon	no sign	grassland	10:00:00	late morning	0.5	absent
2012-01-15	Jan	Summer 2011-12	birds	2	P40	Eskom	Bedford	partly cloudy, cool	moderate	90	86.7	Pipit African	20	uncommon	no sign	grassland	10:00:00	late morning	0.5	absent
2012-01-15	Jan	Summer 2011-12	birds	2	P40	Eskom	Bedford	partly cloudy, cool	moderate	90	86.7	Pipit Yellow-breasted	1	rare	no sign	grassland	10:00:00	late morning	0.5	absent
2012-01-15	Jan	Summer 2011-12	birds	2	P40	Eskom	Bedford	partly cloudy, cool	moderate	90	86.7	Quail Common	5	rare	no sign	grassland	10:00:00	late morning	0.5	absent
2012-01-15	Jan	Summer 2011-12	birds	2	P40	Eskom	Bedford	partly cloudy, cool	moderate	90	86.7	Swallow Barn	3	least concern	no sign	aerial feeder	10:00:00	late morning	0.5	absent
2012-02-13	Feb	Summer 2011-12	birds	1	P40	Eskom	Bedford	clear , cool	calm	100	100	Cisticola Wing-snapping	3	least concern	no sign	grassland	08:00:00	mid-morning	0.5	absent	1
2012-02-13	Feb	Summer 2011-12	birds	1	P40	Eskom	Bedford	clear , cool	calm	100	100	Cisticola Zitting	15	least concern	no sign	grassland	08:00:00	mid-morning	0.5	absent	1
2012-02-13	Feb	Summer 2011-12	birds	1	P40	Eskom	Bedford	clear , cool	calm	100	100	Crow Cape	2	least concern	none breeder	grassland	08:00:00	mid-morning	0.5	absent	1
2012-02-13	Feb	Summer 2011-12	birds	1	P40	Eskom	Bedford	clear , cool	calm	100	100	Longclaw Cape	12	uncommon	no sign	grassland	08:00:00	mid-morning	0.5	absent	1
2012-02-13	Feb	Summer 2011-12	birds	1	P40	Eskom	Bedford	clear , cool	calm	100	100	Longclaw Cape	14	uncommon	no sign	grassland	08:00:00	mid-morning	0.5	absent	1
2012-02-13	Feb	Summer 2011-12	birds	1	P40	Eskom	Bedford	clear , cool	calm	100	100	Martin Banded	1	least concern	no sign	aerial feeder	08:00:00	mid-morning	0.5	absent	1
2012-02-13	Feb	Summer 2011-12	birds	1	P40	Eskom	Bedford	clear , cool	calm	100	100	Pipit Yellow-breasted	11	uncommon	breeding	grassland	08:00:00	mid-morning	0.5	absent	1
2012-02-13	Feb	Summer 2011-12	birds	1	P40	Eskom	Bedford	clear , cool	calm	100	100	Pipit Yellow-breasted	15	uncommon	breeding	grassland	08:00:00	mid-morning	0.5	absent	1
2012-02-13	Feb	Summer 2011-12	birds	1	P40	Eskom	Bedford	clear , cool	calm	100	100	Pipit Yellow-breasted	27	uncommon	breeding	grassland	08:00:00	mid-morning	0.5	absent	1
2012-02-13	Feb	Summer 2011-12	birds	1	P40	Eskom	Bedford	clear , cool	calm	100	100	Swallow Greater-striped	1	least concern	none breeder	aerial feeder	08:00:00	mid-morning	0.5	absent	1
2012-02-13	Feb	Summer 2011-12	vegetation	3	P40	Eskom	Bedford	clear, hot	calm	80	86.7	Cisticola Wing-snapping				grassland			0.5
2012-02-13	Feb	Summer 2011-12	vegetation	3	P40	Eskom	Bedford	clear, hot	calm	80	86.7	Cisticola Zitting				grassland			0.5
2012-02-13	Feb	Summer 2011-12	vegetation	3	P40	Eskom	Bedford	clear, hot	calm	80	86.7	Crow Cape				grassland			0.5
2012-02-13	Feb	Summer 2011-12	vegetation	3	P40	Eskom	Bedford	clear, hot	calm	80	86.7	Longclaw Cape				grassland			0.5
2012-02-13	Feb	Summer 2011-12	vegetation	3	P40	Eskom	Bedford	clear, hot	calm	80	86.7	Martin Banded				aerial feeder			0.5
2012-02-13	Feb	Summer 2011-12	vegetation	3	P40	Eskom	Bedford	clear, hot	calm	80	86.7	Pipit Yellow-breasted				grassland			0.5
2012-02-15	Feb	Summer 2011-12	birds	2	P40	Eskom	Bedford	clear, hot	calm	80	86.7	Buzzard Steppe	30	least concern	none breeder	raptor	14:40:00	early noon	0.5	absent	1
2012-02-15	Feb	Summer 2011-12	birds	2	P40	Eskom	Bedford	clear, hot	calm	80	86.7	Cisticola Wing-snapping	1	least concern	no sign	grassland	14:40:00	early noon	0.5	absent	1
2012-02-15	Feb	Summer 2011-12	birds	2	P40	Eskom	Bedford	clear, hot	calm	80	86.7	Crow Cape	29	least concern	none breeder	grassland	14:40:00	early noon	0.5	absent	1
2012-02-15	Feb	Summer 2011-12	birds	2	P40	Eskom	Bedford	clear, hot	calm	80	86.7	Falcon Amur	18	rare	none breeder	grassland raptor	14:40:00	early noon	0.5	absent	1
2012-02-15	Feb	Summer 2011-12	birds	2	P40	Eskom	Bedford	clear, hot	calm	80	86.7	Martin Banded	1	least concern	no sign	aerial feeder	14:40:00	early noon	0.5	absent	1
2012-02-15	Feb	Summer 2011-12	birds	2	P40	Eskom	Bedford	clear, hot	calm	80	86.7	Pipit Yellow-breasted	21	rare	no sign	grassland	14:40:00	early noon	0.5	absent	1
2012-02-15	Feb	Summer 2011-12	birds	2	P40	Eskom	Bedford	clear, hot	calm	80	86.7	Swallow Greater-striped	25	least concern	none breeder	aerial feeder	14:40:00	early noon	0.5	absent	1
2010-07-08	July	Winter 2010	birds	1	P40	Eskom	Bedford	clear, hot	calm	80	86.7	Chat Ant-eating	7	least concern	no sign	grassland	11:00:00	mid-day	0.5	absent	1	0	1	0
2010-07-08	July	Winter 2010	birds	1	P40	Eskom	Bedford	clear, hot	calm	80	86.7	Chat Ant-eating	8	least concern	no sign	grassland	11:00:00	mid-day	0.5	absent	1	0	1	0
2010-07-08	July	Winter 2010	birds	1	P40	Eskom	Bedford	clear, hot	calm	80	86.7	Lark Red-capped	3	rare	no sign	grassland	11:00:00	mid-day	0.5	absent	1	0	1	0
2010-07-08	July	Winter 2010	birds	1	P40	Eskom	Bedford	clear, hot	calm	80	86.7	Longclaw Cape	5	uncommon	no sign	grassland	11:00:00	mid-day	0.5	absent	1	0	1	0
2010-07-08	July	Winter 2010	birds	1	P40	Eskom	Bedford	clear, hot	calm	80	86.7	Longclaw Cape	6	uncommon	no sign	grassland	11:00:00	mid-day	0.5	absent	1	0	1	0
2010-07-08	July	Winter 2010	birds	1	P40	Eskom	Bedford	clear, hot	calm	80	86.7	Longclaw Cape	7	uncommon	no sign	grassland	11:00:00	mid-day	0.5	absent	1	0	1	0
2010-07-08	July	Winter 2010	birds	1	P40	Eskom	Bedford	clear , cool	strong	100	86.7	Pipit African	3	uncommon	no sign	grassland	11:00:00	mid-day	0.5	present	1	0	1	0
2010-07-08	July	Winter 2010	birds	1	P40	Eskom	Bedford	clear , cool	strong	100	86.7	Pipit African	5	uncommon	no sign	grassland	11:00:00	mid-day	0.5	present	1	0	1	0
2010-07-08	July	Winter 2010	birds	1	P40	Eskom	Bedford	clear , cool	strong	100	86.7	Widowbird Long-tailed	8	rare	no sign	grassland	11:00:00	mid-day	0.5	present	1	0	1	0
2010-07-26	July	Winter 2010	birds	2	P40	Eskom	Bedford	partly cloudy, cool	moderate	90	86.7	Cisticola Wing-snapping	10	least concern	no sign	grassland	14:45:00	early noon	0.5	absent	1	0	1	0
2010-07-26	July	Winter 2010	birds	2	P40	Eskom	Bedford	partly cloudy, cool	moderate	90	86.7	Ibis Southern Bald	25	least concern	no sign	grassland	14:45:00	early noon	0.5	absent	1	0	1	0
2010-07-26	July	Winter 2010	birds	2	P40	Eskom	Bedford	partly cloudy, cool	moderate	90	86.7	Lark Red-capped	3	rare	no sign	grassland	14:45:00	early noon	0.5	absent	1	0	1	0
2010-07-26	July	Winter 2010	birds	2	P40	Eskom	Bedford	clear, cold	strong	75	70	Longclaw Cape	2	uncommon	no sign	grassland	14:45:00	early noon	0.5	present	1	1	0	0
2010-07-26	July	Winter 2010	birds	2	P40	Eskom	Bedford	clear, cold	strong	75	70	Longclaw Cape	3	uncommon	no sign	grassland	14:45:00	early noon	0.5	present	1	0	0	1
2010-07-26	July	Winter 2010	birds	2	P40	Eskom	Bedford	clear, cold	strong	75	70	Longclaw Cape	12	uncommon	no sign	grassland	14:45:00	early noon	0.5	present	1	0	1	0
2010-07-26	July	Winter 2010	birds	2	P40	Eskom	Bedford	clear, cold	strong	75	70	Pipit African	5	rare	no sign	grassland	14:45:00	early noon	0.5	present	1	1	0	0
2010-07-26	July	Winter 2010	birds	2	P40	Eskom	Bedford	clear, cold	strong	75	70	Secretarybird	30	least concern	no sign	grassland	14:45:00	early noon	0.5	present	1	0	1	0
2010-07-26	July	Winter 2010	birds	2	P40	Eskom	Bedford	partly cloudy, cool	strong	90	80	Thrush Sentinel Rock	1	least concern	no sign	grassland	14:45:00	early noon	0.5	present	1	0	1	0
2010-07-26	July	Winter 2010	birds	2	P40	Eskom	Bedford	partly cloudy, cool	moderate	90	86.7	Wheater Mountain	12	least concern	no sign	grassland	14:45:00	early noon	0.5	absent	1	0	1	0
2011-11-16	Nov	Summer 2011-12	birds	1	P41	Eskom	Bedford	partly cloudy, cool	strong	90	80	Cisticola Wing-snapping	20	least concern	no sign	grassland	16:40:00	late noon	0.5	absent	1
2011-11-16	Nov	Summer 2011-12	birds	1	P41	Eskom	Bedford	partly cloudy, cool	strong	90	80	Crow Cape	17	least concern	no sign	grassland	16:40:00	late noon	0.5	absent	1
2011-11-16	Nov	Summer 2011-12	birds	1	P41	Eskom	Bedford	partly cloudy, cool	strong	90	80	Lark Red-capped	10	rare	no sign	grassland	16:40:00	late noon	0.5	absent	1
2011-11-16	Nov	Summer 2011-12	birds	1	P41	Eskom	Bedford	partly cloudy, cool	strong	90	80	Longclaw Cape	1	common	no sign	grassland	16:40:00	late noon	0.5	absent	1
2011-11-16	Nov	Summer 2011-12	birds	1	P41	Eskom	Bedford	partly cloudy, cool	strong	90	80	Longclaw Cape	10	common	no sign	grassland	16:40:00	late noon	0.5	absent	1
2011-11-16	Nov	Summer 2011-12	birds	1	P41	Eskom	Bedford	partly cloudy, cool	strong	90	80	Longclaw Cape	20	common	no sign	grassland	16:40:00	late noon	0.5	absent	1
2011-11-16	Nov	Summer 2011-12	birds	1	P41	Eskom	Bedford	partly cloudy, cool	strong	90	80	Longclaw Cape	24	common	no sign	grassland	16:40:00	late noon	0.5	absent	1
2011-11-16	Nov	Summer 2011-12	birds	1	P41	Eskom	Bedford	partly cloudy, cool	strong	90	80	Pipit Yellow-breasted	21	rare	no sign	grassland	16:40:00	late noon	0.5	absent	1
2011-11-16	Nov	Summer 2011-12	vegetation	3	P41	Eskom	Bedford	clear, cold	moderate	75	76.7	Cisticola Wing-snapping				grassland			0.5
2011-11-16	Nov	Summer 2011-12	vegetation	3	P41	Eskom	Bedford	clear, cold	moderate	75	76.7	Martin Banded				aerial feeder			0.5
2011-11-16	Nov	Summer 2011-12	vegetation	3	P41	Eskom	Bedford	clear, cold	moderate	75	76.7	Pipit African				grassland			0.5
2011-11-16	Nov	Summer 2011-12	vegetation	3	P41	Eskom	Bedford	clear, cold	moderate	75	76.7	Pipit Yellow-breasted				grassland			0.5
2011-11-29	Nov	Summer 2011-12	birds	2	P41	Eskom	Bedford	partly cloudy, cool	moderate	90	86.7	Bustard Denham's	1	least concern	no sign	grassland	14:30:00	early noon	0.5	absent	1
2011-11-29	Nov	Summer 2011-12	birds	2	P41	Eskom	Bedford	partly cloudy, cool	moderate	90	86.7	Cisticola Wing-snapping	1	least concern	no sign	grassland	14:30:00	early noon	0.5	absent	1
2011-11-29	Nov	Summer 2011-12	birds	2	P41	Eskom	Bedford	partly cloudy, cool	moderate	90	86.7	Cisticola Zitting	2	least concern	no sign	grassland	14:30:00	early noon	0.5	absent	1
2011-11-29	Nov	Summer 2011-12	birds	2	P41	Eskom	Bedford	partly cloudy, cool	moderate	90	86.7	Lark Eastern Long-billed	1	least concern	no sign	grassland	14:30:00	early noon	0.5	absent	1
2011-11-29	Nov	Summer 2011-12	birds	2	P41	Eskom	Bedford	partly cloudy, cool	moderate	90	86.7	Longclaw Cape	3	rare	no sign	grassland	14:30:00	early noon	0.5	absent	1
2011-11-29	Nov	Summer 2011-12	birds	2	P41	Eskom	Bedford	partly cloudy, cool	moderate	90	86.7	Quail Common	5	common	no sign	grassland	14:30:00	early noon	0.5	absent	1
2011-11-29	Nov	Summer 2011-12	birds	2	P41	Eskom	Bedford	partly cloudy, cool	moderate	90	86.7	Quail Common	6	common	no sign	grassland	14:30:00	early noon	0.5	absent	1
2011-11-29	Nov	Summer 2011-12	birds	2	P41	Eskom	Bedford	partly cloudy, cool	moderate	90	86.7	Quail Common	19	common	no sign	grassland	14:30:00	early noon	0.5	absent	1
2011-11-29	Nov	Summer 2011-12	birds	2	P41	Eskom	Bedford	partly cloudy, cool	moderate	90	86.7	Quail Common	23	common	no sign	grassland	14:30:00	early noon	0.5	absent	1
2011-11-29	Nov	Summer 2011-12	birds	2	P41	Eskom	Bedford	partly cloudy, cool	moderate	90	86.7	Swallow Greater-striped	19	least concern	no sign	aerial feeder	14:30:00	early noon	0.5	absent	1
2011-12-19	Dec	Summer 2011-12	birds	1	P41	Eskom	Bedford	partly cloudy, cold	moderate	65	70	Cisticola Cloud	1	least concern	no sign	grassland	15:45:00	mid-noon	0.5	absent
2011-12-19	Dec	Summer 2011-12	birds	1	P41	Eskom	Bedford	partly cloudy, cool	moderate	65	70	Cisticola Wing-snapping	1	least concern	no sign	grassland	15:45:00	mid-noon	0.5	absent
2011-12-19	Dec	Summer 2011-12	birds	1	P41	Eskom	Bedford	partly cloudy, cold	moderate	65	70	Cisticola Zitting	4	least concern	no sign	grassland	15:45:00	mid-noon	0.5	absent
2011-12-19	Dec	Summer 2011-12	birds	1	P41	Eskom	Bedford	partly cloudy, cold	moderate	65	70	Crane Wattled	24	least concern	breeding	wetland	15:45:00	mid-noon	0.5	absent
2011-12-19	Dec	Summer 2011-12	birds	1	P41	Eskom	Bedford	partly cloudy, cold	moderate	65	70	Martin Banded	9	least concern	no sign	aerial feeder	15:45:00	mid-noon	0.5	absent
2011-12-19	Dec	Summer 2011-12	birds	1	P41	Eskom	Bedford	partly cloudy, cool	moderate	65	70	Pipit Yellow-breasted	16	uncommon	breeding	grassland	15:45:00	mid-noon	0.5	present	1
2011-12-19	Dec	Summer 2011-12	birds	1	P41	Eskom	Bedford	partly cloudy, cool	moderate	65	70	Pipit Yellow-breasted	17	uncommon	breeding	grassland	15:45:00	mid-noon	0.5	present	1
2011-12-19	Dec	Summer 2011-12	birds	1	P41	Eskom	Bedford	partly cloudy, cool	moderate	65	70	Pipit Yellow-breasted	21	uncommon	breeding	grassland	15:45:00	mid-noon	0.5	present	1
2011-12-19	Dec	Summer 2011-12	birds	1	P41	Eskom	Bedford	partly cloudy, cool	moderate	65	70	Quail Common	3	rare	no sign	grassland	15:45:00	mid-noon	0.5	present	1
2011-12-19	Dec	Summer 2011-12	birds	1	P41	Eskom	Bedford	partly cloudy, cool	moderate	65	70	Quailfinch African	15	rare	breeding	grassland	15:45:00	mid-noon	0.5	present	1
2011-12-19	Dec	Summer 2011-12	birds	1	P41	Eskom	Bedford	partly cloudy, cool	moderate	65	70	Swallow Barn	7	least concern	no sign	aerial feeder	15:45:00	mid-noon	0.5	present	1
2011-12-19	Dec	Summer 2011-12	vegetation	3	P41	Eskom	Bedford	clear, hot	calm	80	86.6	Bustard Denham's				grassland
2011-12-19	Dec	Summer 2011-12	vegetation	3	P41	Eskom	Bedford	clear, hot	calm	80	86.6	Cisticola Cloud				grassland
2011-12-19	Dec	Summer 2011-12	vegetation	3	P41	Eskom	Bedford	clear, hot	calm	80	86.6	Cisticola Wing-snapping				grassland
2011-12-19	Dec	Summer 2011-12	vegetation	3	P41	Eskom	Bedford	clear, hot	calm	80	86.6	Cisticola Zitting				grassland
2011-12-19	Dec	Summer 2011-12	vegetation	3	P41	Eskom	Bedford	clear, hot	calm	80	86.6	Korhaan White-bellied				grassland
2011-12-19	Dec	Summer 2011-12	vegetation	3	P41	Eskom	Bedford	clear, hot	calm	80	86.6	Lark Eastern Long-billed				grassland
2011-12-19	Dec	Summer 2011-12	vegetation	3	P41	Eskom	Bedford	clear, hot	calm	80	86.6	Longclaw Cape				grassland
2011-12-19	Dec	Summer 2011-12	vegetation	3	P41	Eskom	Bedford	clear, hot	calm	80	86.6	Quail Common				grassland
2011-12-20	Dec	Summer 2011-12	birds	2	P41	Eskom	Bedford	clear , cool	moderate	100	93.3	Cisticola Cloud	3	least concern	breeding	grassland	10:40:00	late morning	0.5	present	1
2011-12-20	Dec	Summer 2011-12	birds	2	P41	Eskom	Bedford	clear , cool	moderate	100	93.3	Cisticola Wing-snapping	2	least concern	breeding	grassland	10:40:00	late morning	0.5	present	1
2011-12-20	Dec	Summer 2011-12	birds	2	P41	Eskom	Bedford	clear , cool	moderate	100	93.3	Cisticola Zitting	1	least concern	breeding	grassland	10:40:00	late morning	0.5	present	1
2011-12-20	Dec	Summer 2011-12	birds	2	P41	Eskom	Bedford	clear , cool	moderate	100	93.3	Lark Eastern Long-billed	16	least concern	breeding	grassland	10:40:00	late morning	0.5	absent	1
2011-12-20	Dec	Summer 2011-12	birds	2	P41	Eskom	Bedford	clear , cool	moderate	100	93.3	Longclaw Cape	13	uncommon	breeding	grassland	10:40:00	late morning	0.5	absent	1
2011-12-20	Dec	Summer 2011-12	birds	2	P41	Eskom	Bedford	clear , cool	moderate	100	93.3	Quail Common	22	uncommon	breeding	grassland	10:40:00	late morning	0.5	absent	1
2012-01-12	Jan	Summer 2011-12	vegetation	3	P41	Eskom	Bedford	clear, hot	moderate	80	80	Cisticola Cloud				grassland			0.5
2012-01-12	Jan	Summer 2011-12	vegetation	3	P41	Eskom	Bedford	clear, hot	moderate	80	80	Cisticola Wing-snapping				grassland			0.5
2012-01-12	Jan	Summer 2011-12	vegetation	3	P41	Eskom	Bedford	clear, hot	moderate	80	80	Cisticola Zitting				grassland			0.5
2012-01-12	Jan	Summer 2011-12	vegetation	3	P41	Eskom	Bedford	clear, hot	moderate	80	80	Longclaw Cape				grassland			0.5
2012-01-12	Jan	Summer 2011-12	vegetation	3	P41	Eskom	Bedford	clear, hot	moderate	80	80	Pipit Yellow-breasted				grassland			0.5
2012-01-12	Jan	Summer 2011-12	vegetation	3	P41	Eskom	Bedford	clear, hot	moderate	80	80	Swallow Barn				aerial feeder			0.5
2012-01-14	Jan	Summer 2011-12	birds	1	P41	Eskom	Bedford	partly cloudy, cool	moderate	90	86.7	Bustard Denham's	1	least concern	no sign	grassland	09:50:00	late morning	0.5	absent
2012-01-14	Jan	Summer 2011-12	birds	1	P41	Eskom	Bedford	partly cloudy, cool	moderate	90	86.7	Cisticola Cloud	3	least concern	no sign	grassland	09:50:00	late morning	0.5	absent
2012-01-14	Jan	Summer 2011-12	birds	1	P41	Eskom	Bedford	partly cloudy, cool	moderate	90	86.7	Cisticola Wing-snapping	15	least concern	no sign	grassland	09:50:00	late morning	0.5	absent
2012-01-14	Jan	Summer 2011-12	birds	1	P41	Eskom	Bedford	partly cloudy, cool	moderate	90	86.7	Cisticola Zitting	21	least concern	no sign	grassland	09:50:00	late morning	0.5	absent
2012-01-14	Jan	Summer 2011-12	birds	1	P41	Eskom	Bedford	partly cloudy, cool	moderate	90	86.7	Lark Eastern Long-billed	16	least concern	no sign	grassland	09:50:00	late morning	0.5	absent
2012-01-14	Jan	Summer 2011-12	birds	1	P41	Eskom	Bedford	partly cloudy, cool	moderate	90	86.7	Longclaw Cape	15	rare	no sign	grassland	09:50:00	late morning	0.5	absent
2012-01-14	Jan	Summer 2011-12	birds	1	P41	Eskom	Bedford	partly cloudy, cool	moderate	90	86.7	Pipit Yellow-breasted	16	uncommon	no sign	grassland	09:50:00	late morning	0.5	absent
2012-01-14	Jan	Summer 2011-12	birds	1	P41	Eskom	Bedford	partly cloudy, cool	moderate	90	86.7	Pipit Yellow-breasted	19	uncommon	no sign	grassland	09:50:00	late morning	0.5	absent
2012-01-14	Jan	Summer 2011-12	birds	1	P41	Eskom	Bedford	partly cloudy, cool	moderate	90	86.7	Pipit Yellow-breasted	21	uncommon	no sign	grassland	09:50:00	late morning	0.5	absent
2012-01-14	Jan	Summer 2011-12	birds	1	P41	Eskom	Bedford	partly cloudy, cool	moderate	90	86.7	Swallow Barn	1	least concern	no sign	aerial feeder	09:50:00	late morning	0.5	absent
2012-01-16	Jan	Summer 2011-12	birds	2	P41	Eskom	Bedford	partly cloudy, cold	moderate	65	70	Bustard Denham's	1	rare	no sign	grassland	10:10:00	late morning	0.5	absent
2012-01-16	Jan	Summer 2011-12	birds	2	P41	Eskom	Bedford	partly cloudy, cold	moderate	65	70	Cisticola Wing-snapping	8	least concern	no sign	grassland	10:10:00	late morning	0.5	absent
2012-01-16	Jan	Summer 2011-12	birds	2	P41	Eskom	Bedford	partly cloudy, cold	moderate	65	70	Longclaw Cape	15	uncommon	no sign	grassland	10:10:00	late morning	0.5	absent
2012-01-16	Jan	Summer 2011-12	birds	2	P41	Eskom	Bedford	partly cloudy, cold	moderate	65	70	Pipit Yellow-breasted	5	uncommon	no sign	grassland	10:10:00	late morning	0.5	absent
2012-01-16	Jan	Summer 2011-12	birds	2	P41	Eskom	Bedford	partly cloudy, cold	moderate	65	70	Pipit Yellow-breasted	15	uncommon	no sign	grassland	10:10:00	late morning	0.5	absent
2012-02-12	Feb	Summer 2011-12	birds	1	P41	Eskom	Bedford	clear , cool	strong	100	86.7	Buzzard Jackal	7	least concern	no sign	raptor	10:00:00	late morning	0.5	absent	1
2012-02-12	Feb	Summer 2011-12	birds	1	P41	Eskom	Bedford	clear , cool	strong	100	86.7	Cisticola Wing-snapping	1	least concern	no sign	grassland	10:00:00	late morning	0.5	absent	1
2012-02-12	Feb	Summer 2011-12	birds	1	P41	Eskom	Bedford	clear , cool	strong	100	86.7	Crane Wattled	1	least concern	no sign	wetland	10:00:00	late morning	0.5	absent	1
2012-02-12	Feb	Summer 2011-12	birds	1	P41	Eskom	Bedford	clear , cool	strong	100	86.7	Kestrel Rock	9	least concern	none breeder	raptor	10:00:00	late morning	0.5	absent	1
2012-02-12	Feb	Summer 2011-12	birds	1	P41	Eskom	Bedford	clear , cool	strong	100	86.7	Longclaw Cape	1	rare	breeding	grassland	10:00:00	late morning	0.5	absent	1
2012-02-12	Feb	Summer 2011-12	birds	1	P41	Eskom	Bedford	clear , cool	strong	100	86.7	Martin Banded	1	least concern	no sign	aerial feeder	10:00:00	late morning	0.5	absent	1
2012-02-12	Feb	Summer 2011-12	birds	1	P41	Eskom	Bedford	clear , cool	strong	100	86.7	Pipit Yellow-breasted	15	rare	breeding	grassland	10:00:00	late morning	0.5	absent	1
2012-02-12	Feb	Summer 2011-12	birds	1	P41	Eskom	Bedford	clear , cool	strong	100	86.7	Secretarybird	1	least concern	none breeder	grassland	10:00:00	late morning	0.5	absent	1
2012-02-12	Feb	Summer 2011-12	vegetation	3	P41	Eskom	Bedford	clear, hot	strong	80	73.3	Cisticola Zitting				grassland			0.5
2012-02-12	Feb	Summer 2011-12	vegetation	3	P41	Eskom	Bedford	clear, hot	strong	80	73.3	Martin Banded				aerial feeder			0.5
2012-02-12	Feb	Summer 2011-12	vegetation	3	P41	Eskom	Bedford	clear, hot	strong	80	73.3	Pipit Yellow-breasted				grassland			0.5
2012-02-12	Feb	Summer 2011-12	vegetation	3	P41	Eskom	Bedford	clear, hot	strong	80	73.3	Secretarybird				grassland			0.5
2012-02-14	Feb	Summer 2011-12	birds	2	P41	Eskom	Bedford	clear , cool	moderate	100	93.3	Cisticola Wing-snapping	1	least concern	no sign	grassland	15:00:00	mid-noon	0.5	absent	1
2012-02-14	Feb	Summer 2011-12	birds	2	P41	Eskom	Bedford	clear , cool	moderate	100	93.3	Cisticola Zitting	9	least concern	no sign	grassland	15:00:00	mid-noon	0.5	absent	1
2012-02-14	Feb	Summer 2011-12	birds	2	P41	Eskom	Bedford	clear , cool	moderate	100	93.3	Falcon Lanner	6	least concern	none breeder	grassland raptor	15:00:00	mid-noon	0.5	absent	1
2012-02-14	Feb	Summer 2011-12	birds	2	P41	Eskom	Bedford	clear , cool	moderate	100	93.3	Secretarybird	1	least concern	none breeder	grassland	15:00:00	mid-noon	0.5	absent	1
2012-02-14	Feb	Summer 2011-12	birds	2	P41	Eskom	Bedford	clear , cool	moderate	100	93.3	Swallow Barn	6	least concern	none breeder	aerial feeder	15:00:00	mid-noon	0.5	absent	1
2010-03-05	March	Autumn 2010	birds	1	P42	Eskom	Wilge Rivier	partly cloudy, cool	strong	90	80	Cisticola Cloud	3	least concern	no sign	grassland	15:03:00	mid-noon	0.25	absent	1	0	1	0
2010-03-05	March	Autumn 2010	birds	1	P42	Eskom	Wilge Rivier	partly cloudy, cool	strong	90	80	Cisticola Zitting	1	least concern	no sign	grassland	15:03:00	mid-noon	0.25	absent	1	0	1	0
2010-03-05	March	Autumn 2010	birds	1	P42	Eskom	Wilge Rivier	clear, cold	moderate	75	76.7	Longclaw Cape	1	uncommon	no sign	grassland	15:03:00	mid-noon	0.25	present	1	1	0	0
2010-03-05	March	Autumn 2010	birds	1	P42	Eskom	Wilge Rivier	clear, cold	moderate	75	76.7	Longclaw Cape	8	uncommon	no sign	grassland	15:03:00	mid-noon	0.25	present	1	0	1	0
2010-03-05	March	Autumn 2010	birds	1	P42	Eskom	Wilge Rivier	clear, cold	moderate	75	76.7	Longclaw Cape	25	uncommon	no sign	grassland	15:03:00	mid-noon	0.25	present	1	0	1	0
2010-03-05	March	Autumn 2010	birds	1	P42	Eskom	Wilge Rivier	clear, cold	moderate	75	76.7	Martin Banded	15	least concern	no sign	aerial feeder	15:03:00	mid-noon	0.25	present	1	0	0	1
2010-03-05	March	Autumn 2010	birds	1	P42	Eskom	Wilge Rivier	clear, cold	moderate	75	76.7	Pipit Yellow-breasted	1	uncommon	no sign	grassland	15:03:00	mid-noon	0.25	present	1	0	1	0
2010-03-05	March	Autumn 2010	birds	1	P42	Eskom	Wilge Rivier	clear, cold	moderate	75	76.7	Pipit Yellow-breasted	2	uncommon	no sign	grassland	15:03:00	mid-noon	0.25	present	1	0	1	0
2010-03-05	March	Autumn 2010	birds	1	P42	Eskom	Wilge Rivier	clear, cold	moderate	75	76.7	Swallow Greater-striped	2	least concern	no sign	aerial feeder	15:03:00	mid-noon	0.25	present	1	0	1	0
2010-04-12	April	Autumn 2010	birds	2	P42	Eskom	Wilge Rivier	clear, hot	calm	80	86.7	Chat Ant-eating	20	least concern	no sign	grassland	10:10:00	late morning	0.25	present	1	0	1	0
2010-04-12	April	Autumn 2010	birds	2	P42	Eskom	Wilge Rivier	clear, hot	calm	80	86.7	Cisticola Wing-snapping	15	least concern	no sign	grassland	10:10:00	late morning	0.25	present	1	0	1	0
2010-04-12	April	Autumn 2010	birds	2	P42	Eskom	Wilge Rivier	clear, hot	calm	80	86.7	Lark Eastern Long-billed	1	least concern	no sign	grassland	10:10:00	late morning	0.25	present	1	0	1	0
2010-04-12	April	Autumn 2010	birds	2	P42	Eskom	Wilge Rivier	clear, hot	calm	80	86.7	Lark Red-capped	1	rare	no sign	grassland	10:10:00	late morning	0.25	present	1	0	1	0
2010-04-12	April	Autumn 2010	birds	2	P42	Eskom	Wilge Rivier	clear, hot	calm	80	86.7	Longclaw Cape	6	rare	no sign	grassland	10:10:00	late morning	0.25	present	1	0	1	0
2010-04-12	April	Autumn 2010	birds	2	P42	Eskom	Wilge Rivier	partly cloudy, cool	strong	90	80	Martin Banded	1	least concern	no sign	aerial feeder	10:10:00	late morning	0.25	present	1	0	1	0
2010-04-12	April	Autumn 2010	birds	2	P42	Eskom	Wilge Rivier	partly cloudy, cool	strong	90	80	Quailfinch African	20	rare	no sign	grassland	10:10:00	late morning	0.25	present	1	1	0	0
2010-04-12	April	Autumn 2010	birds	2	P42	Eskom	Wilge Rivier	clear, hot	calm	80	86.7	Swallow Barn	2	least concern	no sign	aerial feeder	10:10:00	late morning	0.25	present	1	0	1	0
2010-04-12	April	Autumn 2010	birds	2	P42	Eskom	Wilge Rivier	clear, hot	calm	80	86.7	swift African Black	1	least concern	no sign	aerial feeder	10:10:00	late morning	0.25	present	1	0	1	0
2010-04-12	April	Autumn 2010	birds	2	P42	Eskom	Wilge Rivier	clear, hot	calm	80	86.7	Swift white-rumped	28	least concern	no sign	aerial feeder	10:10:00	late morning	0.25	present	1	0	1	0
2010-04-13	April	Autumn 2010	birds	2	P42	Eskom	Wilge Rivier	clear, hot	calm	80	86.7	Longclaw Cape	6	rare	no sign	grassland	11:05:00	mid-day	0.25	present	1	0	1	0
2010-04-13	April	Autumn 2010	birds	2	P42	Eskom	Wilge Rivier	clear, hot	calm	80	86.7	Pipit Yellow-breasted	6	rare	no sign	grassland	11:05:00	mid-day	0.25	present	1	0	0	1
2011-03-17	March	Autumn 2010-11	vegetation	3	P42	Eskom	Wilge Rivier					Chat Ant-eating				grassland			0.5
2011-03-17	March	Autumn 2010-11	vegetation	3	P42	Eskom	Wilge Rivier					Cisticola Wing-snapping				grassland			0.5
2011-03-17	March	Autumn 2010-11	vegetation	3	P42	Eskom	Wilge Rivier					Crow Cape				grassland			0.5
2011-03-17	March	Autumn 2010-11	vegetation	3	P42	Eskom	Wilge Rivier					Longclaw Cape				grassland			0.5
2011-03-17	March	Autumn 2010-11	vegetation	3	P42	Eskom	Wilge Rivier					Swallow Barn				aerial feeder			0.5
2011-03-17	March	Autumn 2011	birds	1	P42	Eskom	Wilge Rivier	partly cloudy, cool	moderate	90	86.7	Chat Ant-eating	12	least concern	no sign	grassland	10:45:00	late morning	0.5	absent	1	0	1	0
2011-03-17	March	Autumn 2011	birds	1	P42	Eskom	Wilge Rivier	cloudy, cool	moderate	85	83.3	Cisticola Wing-snapping	6	least concern	no sign	grassland	10:45:00	late morning	0.5	present	1	0	1	0
2011-03-17	March	Autumn 2011	birds	1	P42	Eskom	Wilge Rivier	cloudy, cool	moderate	85	83.3	Longclaw Cape	1	uncommon	no sign	grassland	10:45:00	late morning	0.5	present	1	0	1	0
2011-03-17	March	Autumn 2011	birds	1	P42	Eskom	Wilge Rivier	cloudy, cool	moderate	85	83.3	Longclaw Cape	1	uncommon	no sign	grassland	10:45:00	late morning	0.5	present	1	0	1	0
2011-03-17	March	Autumn 2011	birds	1	P42	Eskom	Wilge Rivier	partly cloudy, cool	moderate	90	86.7	Swallow Barn	16	least concern	no sign	aerial feeder	10:45:00	late morning	0.5	absent	1	0	1	0
2011-03-17	March	Autumn 2011	birds	1	P42	Eskom	Wilge Rivier	partly cloudy, cool	moderate	90	86.7	Vulture Cape	6	least concern	no sign	raptor	10:45:00	late morning	0.5	absent	1	0	1	0
2011-03-24	March	Autumn 2011	birds	2	P42	Eskom	Wilge Rivier	clear, cold	moderate	75	76.7	Chat Ant-eating	21	least concern	no sign	grassland	09:00:00	late morning	0.5	absent	1	0	1	0
2011-03-24	March	Autumn 2011	birds	2	P42	Eskom	Wilge Rivier	clear, cold	moderate	75	76.7	Cisticola Wing-snapping	9	least concern	no sign	grassland	09:00:00	late morning	0.5	absent	1	0	1	0
2011-03-24	March	Autumn 2011	birds	2	P42	Eskom	Wilge Rivier	clear, cold	moderate	75	76.7	Cisticola Zitting	7	least concern	no sign	grassland	09:00:00	late morning	0.5	absent	1	0	1	0
2011-03-24	March	Autumn 2011	birds	2	P42	Eskom	Wilge Rivier	clear, cold	moderate	75	76.7	Crow Cape	12	least concern	no sign	grassland	09:00:00	late morning	0.5	absent	1	0	1	0
2011-03-24	March	Autumn 2011	birds	2	P42	Eskom	Wilge Rivier	clear, cold	moderate	75	76.7	Goose Spur-winged	1	least concern	no sign	grassland	09:00:00	late morning	0.5	absent	1	0	1	0
2011-03-24	March	Autumn 2011	birds	2	P42	Eskom	Wilge Rivier	partly cloudy, cool	moderate	90	86.7	Swallow Barn	23	least concern	no sign	aerial feeder	09:00:00	late morning	0.5	absent	1	1	0	0
2010-10-20	October	Spring 2010	birds	1	P42	Eskom	Wilge Rivier	clear, hot	calm	80	86.7	Crane Blue	23	least concern	no sign	grassland	09:35:00	late morning	0.5	absent	1	0	0	1
2010-10-20	October	Spring 2010	birds	1	P42	Eskom	Wilge Rivier	clear, hot	calm	80	86.7	Lark Red-capped	2	uncommon	no sign	grassland	09:35:00	late morning	0.5	absent	1	0	1	0
2010-10-20	October	Spring 2010	birds	1	P42	Eskom	Wilge Rivier	clear, hot	calm	80	86.7	Lark Red-capped	6	uncommon	no sign	grassland	09:35:00	late morning	0.5	absent	1	0	1	0
2010-10-20	October	Spring 2010	birds	1	P42	Eskom	Wilge Rivier	clear, hot	calm	80	86.7	Lark Red-capped	10	uncommon	no sign	grassland	09:35:00	late morning	0.5	absent	1	0	1	0
2010-10-20	October	Spring 2010	birds	1	P42	Eskom	Wilge Rivier	clear, hot	calm	80	86.7	Longclaw Cape	24	rare	no sign	grassland	09:35:00	late morning	0.5	absent	1	0	1	0
2010-10-20	October	Spring 2010	birds	1	P42	Eskom	Wilge Rivier	clear, hot	calm	80	86.7	Martin Banded	4	least concern	no sign	aerial feeder	09:35:00	late morning	0.5	absent	1	0	0	1
2010-10-20	October	Spring 2010	birds	1	P42	Eskom	Wilge Rivier	clear, hot	calm	80	86.7	Pipit African	1	common	no sign	grassland	09:35:00	late morning	0.5	absent	1	0	1	0
2010-10-20	October	Spring 2010	birds	1	P42	Eskom	Wilge Rivier	clear, hot	calm	80	86.7	Pipit African	3	common	no sign	grassland	09:35:00	late morning	0.5	absent	1	0	1	0
2010-10-20	October	Spring 2010	birds	1	P42	Eskom	Wilge Rivier	clear, hot	calm	80	86.7	Pipit African	5	common	no sign	grassland	09:35:00	late morning	0.5	absent	1	0	1	0
2010-10-20	October	Spring 2010	birds	1	P42	Eskom	Wilge Rivier	clear, hot	calm	80	86.7	Pipit African	10	common	no sign	grassland	09:35:00	late morning	0.5	absent	1	0	1	0
2010-10-20	October	Spring 2010	birds	1	P42	Eskom	Wilge Rivier	clear, hot	calm	80	86.7	Starling Pied	23	least concern	no sign	grassland	09:35:00	late morning	0.5	absent	1	0	1	0
2010-10-26	October	Spring 2010	birds	2	P42	Eskom	Wilge Rivier	cloudy, cool	calm	85	90	Chat Ant-eating	27	least concern	no sign	grassland	08:25:00	mid-morning	0.5	present	1	0	1	0
2010-10-26	October	Spring 2010	birds	2	P42	Eskom	Wilge Rivier	cloudy, cool	calm	85	90	Cisticola Wing-snapping	17	least concern	no sign	grassland	08:25:00	mid-morning	0.5	present	1	0	1	0
2010-10-26	October	Spring 2010	birds	2	P42	Eskom	Wilge Rivier	cloudy, cool	calm	85	90	Crane Blue	4	least concern	no sign	grassland	08:25:00	mid-morning	0.5	present	1	0	1	0
2010-10-26	October	Spring 2010	birds	2	P42	Eskom	Wilge Rivier	cloudy, cool	calm	85	90	Crow Pied	17	least concern	no sign	scavenger	08:25:00	mid-morning	0.5	present	1	0	0	1
2010-10-26	October	Spring 2010	birds	2	P42	Eskom	Wilge Rivier	cloudy, cool	calm	85	90	Ibis Hadeda	1	least concern	no sign	marsh & wetlands	08:25:00	mid-morning	0.5	present	1	0	0	1
2010-10-26	October	Spring 2010	birds	2	P42	Eskom	Wilge Rivier	cloudy, cool	calm	85	90	Lark Eastern Long-billed	2	least concern	no sign	grassland	08:25:00	mid-morning	0.5	present	1	0	1	0
2010-10-26	October	Spring 2010	birds	2	P42	Eskom	Wilge Rivier	cloudy, cool	calm	85	90	Lark Red-capped	4	uncommon	no sign	grassland	08:25:00	mid-morning	0.5	present	1	0	1	0
2010-10-26	October	Spring 2010	birds	2	P42	Eskom	Wilge Rivier	cloudy, cool	calm	85	90	Lark Red-capped	10	uncommon	no sign	grassland	08:25:00	mid-morning	0.5	present	1	0	1	0
2010-10-26	October	Spring 2010	birds	2	P42	Eskom	Wilge Rivier	cloudy, cool	calm	85	90	Lark Red-capped	1	uncommon	no sign	grassland	08:25:00	mid-morning	0.5	present	1	0	0	1
2010-10-26	October	Spring 2010	birds	2	P42	Eskom	Wilge Rivier	cloudy, cool	calm	85	90	Longclaw Cape	2	abundant	no sign	grassland	08:25:00	mid-morning	0.5	present	1	0	1	0
2010-10-26	October	Spring 2010	birds	2	P42	Eskom	Wilge Rivier	cloudy, cool	calm	85	90	Longclaw Cape	20	abundant	no sign	grassland	08:25:00	mid-morning	0.5	present	1	0	1	0
2010-10-26	October	Spring 2010	birds	2	P42	Eskom	Wilge Rivier	cloudy, cool	calm	85	90	Longclaw Cape	22	abundant	no sign	grassland	08:25:00	mid-morning	0.5	present	1	0	1	0
2010-10-26	October	Spring 2010	birds	2	P42	Eskom	Wilge Rivier	cloudy, cool	calm	85	90	Longclaw Cape	5	abundant	no sign	grassland	08:25:00	mid-morning	0.5	present	1	0	1	0
2010-10-26	October	Spring 2010	birds	2	P42	Eskom	Wilge Rivier	cloudy, cool	calm	85	90	Longclaw Cape	20	abundant	no sign	grassland	08:25:00	mid-morning	0.5	present	1	0	1	0
2010-10-26	October	Spring 2010	birds	2	P42	Eskom	Wilge Rivier	cloudy, cool	calm	85	90	Martin Banded	6	least concern	no sign	aerial feeder	08:25:00	mid-morning	0.5	present	1	1	0	0
2010-10-26	October	Spring 2010	birds	2	P42	Eskom	Wilge Rivier	cloudy, cool	calm	85	90	Pipit African	7	common	no sign	grassland	08:25:00	mid-morning	0.5	present	1	0	0	1
2010-10-26	October	Spring 2010	birds	2	P42	Eskom	Wilge Rivier	cloudy, cool	calm	85	90	Pipit African	15	common	no sign	grassland	08:25:00	mid-morning	0.5	present	1	0	0	1
2010-10-26	October	Spring 2010	birds	2	P42	Eskom	Wilge Rivier	cloudy, cool	calm	85	90	Pipit African	16	common	no sign	grassland	08:25:00	mid-morning	0.5	present	1	0	1	0
2010-10-26	October	Spring 2010	birds	2	P42	Eskom	Wilge Rivier	cloudy, cool	calm	85	90	Pipit African	20	common	no sign	grassland	08:25:00	mid-morning	0.5	present	1	0	1	0
2010-10-26	October	Spring 2010	birds	2	P42	Eskom	Wilge Rivier	cloudy, cool	calm	85	90	Pipit African	22	common	no sign	grassland	08:25:00	mid-morning	0.5	present	1	0	1	0
2010-10-26	October	Spring 2010	birds	2	P42	Eskom	Wilge Rivier	cloudy, cool	calm	85	90	Snipe African	1	least concern	no sign	grassland	08:25:00	mid-morning	0.5	present	1	0	1	0
2010-10-26	October	Spring 2010	birds	2	P42	Eskom	Wilge Rivier	cloudy, cool	calm	85	90	Swallow Barn	2	least concern	no sign	aerial feeder	08:25:00	mid-morning	0.5	present	1	0	1	0
2010-10-26	October	Spring 2010	birds	2	P42	Eskom	Wilge Rivier	cloudy, cool	calm	85	90	Swallow Barn	17	least concern	no sign	aerial feeder	08:25:00	mid-morning	0.5	present	1	1	0	0
2010-12-08	Dec	Summer 2010-11	birds	1	P42	Eskom	Wilge Rivier	partly cloudy, cool	moderate	90	86.7	Cisticola Wing-snapping	13	least concern	no sign	grassland	16:10:00	late-noon	0.5	absent	1	0	1	0
2010-12-08	Dec	Summer 2010-11	birds	1	P42	Eskom	Wilge Rivier	partly cloudy, cool	moderate	90	86.7	Cisticola Zitting	15	least concern	no sign	grassland	16:10:00	late-noon	0.5	absent	1	0	1	0
2010-12-08	Dec	Summer 2010-11	birds	1	P42	Eskom	Wilge Rivier	partly cloudy, cool	moderate	90	86.7	Korhaan White-bellied	29	least concern	no sign	grassland	16:10:00	late-noon	0.5	absent	1	1	0	0
[truncated: 1,937 more rows]
