# Supplementary material for: Dynamic multi-species occupancy models reveal individualistic habitat preferences in a high-altitude grassland bird community
Source: PeerJ. 2019 Feb 15;7:e6276. doi: 10.7717/peerj.6276 (PMC6378914; doi:10.7717/peerj.6276)
Supplement: Supplemental Information 2 [file peerj-07-6276-s004.xls]

## Sheet: Study plots vegetation 2010-12
Date	Month	Survey	Plot	Property	Grazing	Burning	Firebreak	BirdsTotal	Quadrat	Soil	Grass	Forbs	Dead	Stone	Total	Total/9	H1	H2	H3	H4	Avrge H
2010-12-07	Dec	summer 10 -11	P01	Eskom	none	Oct mid	present	11	1a	0	9	0	0	0	9	1	40	42	40	40	40.5
2010-12-07	Dec	summer 10 -11	P01	Eskom	none	Oct mid	present	11	1b	0	9	0	0	0	9	1	41	45	42	31	39.75
2010-12-07	Dec	summer 10 -11	P01	Eskom	none	Oct mid	present	11	1a	0	9	0	0	0	9	1	41	35	52	44	43
2010-12-07	Dec	summer 10 -11	P01	Eskom	none	Oct mid	present	11	2b	0	9	0	0	0	9	1	46	41	30	36	38.25
2010-12-07	Dec	summer 10 -11	P01	Eskom	none	Oct mid	present	11	3a	0	9	0	0	0	9	1	33	43	36	46	39.5
2010-12-07	Dec	summer 10 -11	P01	Eskom	none	Oct mid	present	11	3b	0	9	0	0	0	9	1	43	30	30	40	35.75
2010-12-07	Dec	summer 10 -11	P01	Eskom	none	Oct mid	present	11	4a	2	7	0	0	0	9	1	34	51	25	40	37.5
2010-12-07	Dec	summer 10 -11	P01	Eskom	none	Oct mid	present	11	4b	0	9	0	0	0	9	1	33	37	40	35	36.25
2010-12-07	Dec	summer 10 -11	P01	Eskom	none	Oct mid	present	11	5a	0	9	0	0	0	9	1	30	38	28	34	32.5
2010-12-07	Dec	summer 10 -11	P01	Eskom	none	Oct mid	present	11	5b	1	8	0	0	0	9	1	36	40	38	38	38
2010-12-07	Dec	summer 10 -11	P01	Eskom	none	Oct mid	present	11	6a	4	5	0	0	0	9	1	5	10	4	4	5.75
2010-12-07	Dec	summer 10 -11	P01	Eskom	none	Oct mid	present	11	6b	3	6	0	0	0	9	1	5	5	5	0	3.75
2010-12-07	Dec	summer 10 -11	P01	Eskom	none	Oct mid	present	11	7a	3	6	0	0	0	9	1	6	4	0	0	2.5
2010-12-07	Dec	summer 10 -11	P01	Eskom	none	Oct mid	present	11	7b	3	5	0	1	0	9	1	6	7	0	0	3.25
2010-12-07	Dec	summer 10 -11	P01	Eskom	none	Oct mid	present	11	8a	5	2	0	2	0	9	1	5	0	0	0	1.25
2010-12-07	Dec	summer 10 -11	P01	Eskom	none	Oct mid	present	11	8b	5	2	0	2	0	9	1	7	0	0	0	1.75
2010-12-07	Dec	summer 10 -11	P01	Eskom	none	Oct mid	present	11	9a	1	7	0	1	0	9	1	4	4	4	5	4.25
2010-12-07	Dec	summer 10 -11	P01	Eskom	none	Oct mid	present	11	9b	3	5	0	1	0	9	1	5	5	0	0	2.5
2010-12-07	Dec	summer 10 -11	P01	Eskom	none	Oct mid	present	11	10a	4	3	1	1	0	9	1	4	5	0	0	2.25
2010-12-07	Dec	summer 10 -11	P01	Eskom	none	Oct mid	present	11	10b	3	4	1	1	0	9	1	5	5	4	0	3.5
2010-12-07	Dec	summer 10 -11	P07	Eskom	none	Oct mid	absent	5	1a	0	9	0	0	0	9	1	0	9	12	0	5.25
2010-12-07	Dec	summer 10 -11	P07	Eskom	none	Oct mid	absent	5	1b	1	5	1	2	0	9	1	10	0	7	0	4.25
2010-12-07	Dec	summer 10 -11	P07	Eskom	none	Oct mid	absent	5	2a	1	5	0	3	0	9	1	20	13	0	12	11.25
2010-12-07	Dec	summer 10 -11	P07	Eskom	none	Oct mid	absent	5	2b	3	4	1	1	0	9	1	10	0	13	7	7.5
2010-12-07	Dec	summer 10 -11	P07	Eskom	none	Oct mid	absent	5	3b	5	3	1	0	0	9	1	7	8	0	0	3.75
2010-12-07	Dec	summer 10 -11	P07	Eskom	none	Oct mid	absent	5	4a	1	5	1	2	0	9	1	0	9	12	10	7.75
2010-12-07	Dec	summer 10 -11	P07	Eskom	none	Oct mid	absent	5	4b	1	6	1	1	0	9	1	7	16	9	0	8
2010-12-07	Dec	summer 10 -11	P07	Eskom	none	Oct mid	absent	5	5a	1	4	2	2	0	9	1	5	4	0	4	3.25
2010-12-07	Dec	summer 10 -11	P07	Eskom	none	Oct mid	absent	5	5b	0	7	1	1	0	9	1	7	5	6	10	7
2010-12-07	Dec	summer 10 -11	P07	Eskom	none	Oct mid	absent	5	6a	3	2	0	4	0	9	1	0	5	0	0	1.25
2010-12-07	Dec	summer 10 -11	P07	Eskom	none	Oct mid	absent	5	6b	4	2	0	3	0	9	1	0	9	0	0	2.25
2010-12-07	Dec	summer 10 -11	P07	Eskom	none	Oct mid	absent	5	7a	2	4	3	0	0	9	1	8	6	8	0	5.5
2010-12-07	Dec	summer 10 -11	P07	Eskom	none	Oct mid	absent	5	7b	1	8	0	0	0	9	1	13	20	14	9	14
2010-12-07	Dec	summer 10 -11	P07	Eskom	none	Oct mid	absent	5	8a	2	3	1	3	0	9	1	11	6	0	0	4.25
2010-12-07	Dec	summer 10 -11	P07	Eskom	none	Oct mid	absent	5	8b	1	3	4	1	0	9	1	5	0	5	9	4.75
2010-12-07	Dec	summer 10 -11	P07	Eskom	none	Oct mid	absent	5	9a	3	2	3	1	0	9	1	0	0	13	0	3.25
2010-12-07	Dec	summer 10 -11	P07	Eskom	none	Oct mid	absent	5	9b	1	6	1	1	0	9	1	12	23	17	0	13
2010-12-07	Dec	summer 10 -11	P07	Eskom	none	Oct mid	absent	5	10a	4	4	0	1	0	9	1	18	14	12	0	11
2010-12-07	Dec	summer 10 -11	P07	Eskom	none	Oct mid	absent	5	10b	3	4	1	1	0	9	1	18	14	18	0	12.5
2010-12-07	Dec	summer 10 -11	P54	Private	heavy	Sept late	present	10	1a	5	4	0	0	0	9	1	5	0	0	0	1.25
2010-12-07	Dec	summer 10 -11	P54	Private	heavy	Sept late	present	10	1b	5	4	0	0	0	9	1	5	5	0	0	2.5
2010-12-07	Dec	summer 10 -11	P54	Private	heavy	Sept late	present	10	2a	4	4	1	0	0	9	1	4	4	0	0	2
2010-12-07	Dec	summer 10 -11	P54	Private	heavy	Sept late	present	10	2b	1	8	0	0	0	9	1	5	5	6	4	5
2010-12-07	Dec	summer 10 -11	P54	Private	heavy	Sept late	present	10	3a	3	3	1	2	0	9	1	4	9	0	0	3.25
2010-12-07	Dec	summer 10 -11	P54	Private	heavy	Sept late	present	10	3b	4	4	1	0	0	9	1	10	6	3	0	4.75
2010-12-07	Dec	summer 10 -11	P54	Private	heavy	Sept late	present	10	4a	4	4	1	0	0	9	1	4	5	7	0	4
2010-12-07	Dec	summer 10 -11	P54	Private	heavy	Sept late	present	10	4b	2	6	1	0	0	9	1	8	0	5	4	4.25
2010-12-07	Dec	summer 10 -11	P54	Private	heavy	Sept late	present	10	5a	4	4	0	1	0	9	1	7	4	0	0	2.75
2010-12-07	Dec	summer 10 -11	P54	Private	heavy	Sept late	present	10	5b	3	4	1	1	0	9	1	6	6	0	0	3
2010-12-07	Dec	summer 10 -11	P54	Private	heavy	Sept late	present	10	6a	5	4	0	0	0	9	1	5	0	5	0	2.5
2010-12-07	Dec	summer 10 -11	P54	Private	heavy	Sept late	present	10	6b	3	4	1	1	0	9	1	6	0	5	0	2.75
2010-12-07	Dec	summer 10 -11	P54	Private	heavy	Sept late	present	10	7a	1	7	1	0	0	9	1	4	4	6	0	3.5
2010-12-07	Dec	summer 10 -11	P54	Private	heavy	Sept late	present	10	7b	2	5	0	2	0	9	1	5	0	3	3	2.75
2010-12-07	Dec	summer 10 -11	P54	Private	heavy	Sept late	present	10	8a	4	5	0	0	0	9	1	5	0	4	3	3
2010-12-07	Dec	summer 10 -11	P54	Private	heavy	Sept late	present	10	8b	3	5	0	1	0	9	1	5	3	0	0	2
2010-12-07	Dec	summer 10 -11	P54	Private	heavy	Sept late	present	10	9a	2	4	2	1	0	9	1	4	0	2	3	2.25
2010-12-07	Dec	summer 10 -11	P54	Private	heavy	Sept late	present	10	9b	4	3	0	2	0	9	1	3	0	4	0	1.75
2010-12-07	Dec	summer 10 -11	P54	Private	heavy	Sept late	present	10	10a	0	5	2	2	0	9	1	4	2	0	4	2.5
2010-12-07	Dec	summer 10 -11	P54	Private	heavy	Sept late	present	10	10b	1	2	4	2	0	9	1	6	4	0	0	2.5
2010-12-07	Dec	summer 10 -11	P54	Private	heavy	Sept late	absent	10	1a	2	5	0	2	0	9	1	8	5	8	2	5.75
2010-12-07	Dec	summer 10 -11	P54	Private	heavy	Sept late	absent	10	1b	1	7	0	1	0	9	1	8	14	0	0	5.5
2010-12-07	Dec	summer 10 -11	P54	Private	heavy	Sept late	absent	10	2a	1	8	0	0	0	9	1	9	7	5	8	7.25
2010-12-07	Dec	summer 10 -11	P54	Private	heavy	Sept late	absent	10	2b	1	4	0	4	0	9	1	6	7	9	6	7
2010-12-07	Dec	summer 10 -11	P54	Private	heavy	Sept late	absent	10	3a	1	3	1	4	0	9	1	0	8	3	5	4
2010-12-07	Dec	summer 10 -11	P54	Private	heavy	Sept late	absent	10	3b	2	6	0	1	0	9	1	0	6	0	6	3
2010-12-07	Dec	summer 10 -11	P54	Private	heavy	Sept late	absent	10	4a	2	6	0	1	0	9	1	0	5	6	4	3.75
2010-12-07	Dec	summer 10 -11	P54	Private	heavy	Sept late	absent	10	4b	2	4	0	3	0	9	1	0	3	3	4	2.5
2010-12-07	Dec	summer 10 -11	P54	Private	heavy	Sept late	absent	10	5a	4	3	1	1	0	9	1	6	4	0	0	2.5
2010-12-07	Dec	summer 10 -11	P54	Private	heavy	Sept late	absent	10	5b	1	6	2	0	0	9	1	0	0	2	5	1.75
2010-12-07	Dec	summer 10 -11	P54	Private	heavy	Sept late	absent	10	6a	4	3	1	1	0	9	1	4	3	2	5	3.5
2010-12-07	Dec	summer 10 -11	P54	Private	heavy	Sept late	absent	10	6b	1	7	0	1	0	9	1	0	9	7	9	6.25
2010-12-07	Dec	summer 10 -11	P54	Private	heavy	Sept late	absent	10	7a	0	9	0	0	0	9	1	7	7	6	5	6.25
2010-12-07	Dec	summer 10 -11	P54	Private	heavy	Sept late	absent	10	7b	0	4	1	4	0	9	1	7	5	10	10	8
2010-12-07	Dec	summer 10 -11	P54	Private	heavy	Sept late	absent	10	8a	4	1	2	2	0	9	1	7	5	0	5	4.25
2010-12-07	Dec	summer 10 -11	P54	Private	heavy	Sept late	absent	10	8b	5	4	0	0	0	9	1	0	0	0	0	0
2010-12-07	Dec	summer 10 -11	P54	Private	heavy	Sept late	absent	10	9a	1	6	0	2	0	9	1	0	0	0	6	1.5
2010-12-07	Dec	summer 10 -11	P54	Private	heavy	Sept late	absent	10	9b	0	8	1	0	0	9	1	4	4	0	3	2.75
2010-12-07	Dec	summer 10 -11	P54	Private	heavy	Sept late	absent	10	10a	0	6	0	3	0	9	1	7	0	4	0	2.75
2010-12-07	Dec	summer 10 -11	P54	Private	heavy	Sept late	absent	10	10b	5	4	0	0	0	9	1	0	0	10	8	4.5
2010-12-07	Dec	summer 10 -11	P57	Private	light	Sept late	absent	7	1a	2	5	0	2	0	9	1	8	5	8	2	5.75
2010-12-07	Dec	summer 10 -11	P57	Private	light	Sept late	absent	7	1b	1	7	0	1	0	9	1	8	14	0	0	5.5
2010-12-07	Dec	summer 10 -11	P57	Private	light	Sept late	absent	7	2a	1	8	0	0	0	9	1	9	7	5	8	7.25
2010-12-07	Dec	summer 10 -11	P57	Private	light	Sept late	absent	7	2b	1	4	0	4	0	9	1	6	7	9	6	7
2010-12-07	Dec	summer 10 -11	P57	Private	light	Sept late	absent	7	3a	1	3	1	4	0	9	1	0	8	3	5	4
2010-12-07	Dec	summer 10 -11	P57	Private	light	Sept late	absent	7	3b	2	6	0	1	0	9	1	0	6	0	6	3
2010-12-07	Dec	summer 10 -11	P57	Private	light	Sept late	absent	7	4a	2	6	0	1	0	9	1	0	5	6	4	3.75
2010-12-07	Dec	summer 10 -11	P57	Private	light	Sept late	absent	7	4b	2	4	0	3	0	9	1	0	3	3	4	2.5
2010-12-07	Dec	summer 10 -11	P57	Private	light	Sept late	absent	7	5a	4	3	1	1	0	9	1	6	4	0	0	2.5
2010-12-07	Dec	summer 10 -11	P57	Private	light	Sept late	absent	7	5b	1	6	2	0	0	9	1	0	0	2	5	1.75
2010-12-07	Dec	summer 10 -11	P57	Private	light	Sept late	absent	7	6a	4	3	1	1	0	9	1	4	3	2	5	3.5
2010-12-07	Dec	summer 10 -11	P57	Private	light	Sept late	absent	7	6b	1	7	0	1	0	9	1	0	9	7	9	6.25
2010-12-07	Dec	summer 10 -11	P57	Private	light	Sept late	absent	7	7a	0	9	0	0	0	9	1	7	7	6	5	6.25
2010-12-07	Dec	summer 10 -11	P57	Private	light	Sept late	absent	7	7b	0	4	1	4	0	9	1	7	5	10	10	8
2010-12-07	Dec	summer 10 -11	P57	Private	light	Sept late	absent	7	8a	4	1	2	2	0	9	1	7	5	0	5	4.25
2010-12-07	Dec	summer 10 -11	P57	Private	light	Sept late	absent	7	8b	5	4	0	0	0	9	1	0	0	0	0	0
2010-12-07	Dec	summer 10 -11	P57	Private	light	Sept late	absent	7	9a	1	6	0	2	0	9	1	0	0	0	6	1.5
2010-12-07	Dec	summer 10 -11	P57	Private	light	Sept late	absent	7	9b	0	8	1	0	0	9	1	4	4	0	3	2.75
2010-12-07	Dec	summer 10 -11	P57	Private	light	Sept late	absent	7	10a	0	6	0	3	0	9	1	7	0	4	0	2.75
2010-12-07	Dec	summer 10 -11	P57	Private	light	Sept late	absent	7	10b	5	4	0	0	0	9	1	0	0	10	8	4.5
2010-12-07	Dec	summer 10 -11	P70	Eskom	none	none	present	11	1b	3	6	0	0	0	9	1	13	20	20	10	15.75
2010-12-07	Dec	summer 10 -11	P70	Eskom	none	none	present	11	2a	2	7	0	0	0	9	1	0	15	22	18	13.75
2010-12-07	Dec	summer 10 -11	P70	Eskom	none	none	present	11	2b	4	4	1	0	0	9	1	0	18	18	15	12.75
2010-12-07	Dec	summer 10 -11	P70	Eskom	none	none	present	11	3a	2	5	2	0	0	9	1	11	9	8	0	7
2010-12-07	Dec	summer 10 -11	P70	Eskom	none	none	present	11	3b	3	4	0	2	0	9	1	3	13	5	0	5.25
2010-12-07	Dec	summer 10 -11	P70	Eskom	none	none	present	11	4a	6	3	0	0	0	9	1	3	7	0	0	2.5
2010-12-07	Dec	summer 10 -11	P70	Eskom	none	none	present	11	4b	4	5	0	0	0	9	1	6	7	0	0	3.25
2010-12-07	Dec	summer 10 -11	P70	Eskom	none	none	present	11	5a	4	3	0	2	0	9	1	0	0	8	12	5
2010-12-07	Dec	summer 10 -11	P70	Eskom	none	none	present	11	5b	4	4	0	1	0	9	1	5	4	0	0	2.25
2010-12-07	Dec	summer 10 -11	P70	Eskom	none	none	present	11	6a	4	4	0	1	0	9	1	0	9	11	13	8.25
2010-12-07	Dec	summer 10 -11	P70	Eskom	none	none	present	11	6b	2	5	0	2	0	9	1	11	14	21	0	11.5
2010-12-07	Dec	summer 10 -11	P70	Eskom	none	none	present	11	7a	3	5	1	0	0	9	1	11	14	22	0	11.75
2010-12-07	Dec	summer 10 -11	P70	Eskom	none	none	present	11	7b	3	5	1	0	0	9	1	19	15	16	0	12.5
2010-12-07	Dec	summer 10 -11	P70	Eskom	none	none	present	11	8a	1	7	0	1	0	9	1	13	10	12	0	8.75
2010-12-07	Dec	summer 10 -11	P70	Eskom	none	none	present	11	8b	4	5	0	0	0	9	1	18	11	0	0	7.25
2010-12-07	Dec	summer 10 -11	P70	Eskom	none	none	present	11	9a	1	4	4	0	0	9	1	18	0	15	19	13
2010-12-07	Dec	summer 10 -11	P70	Eskom	none	none	present	11	9b	1	8	0	0	0	9	1	15	18	9	13	13.75
2010-12-07	Dec	summer 10 -11	P70	Eskom	none	none	present	11	10a	2	5	1	1	0	9	1	0	10	0	9	4.75
2010-12-07	Dec	summer 10 -11	P70	Eskom	none	none	present	11	10b	1	2	4	2	0	9	1	9	10	0	0	4.75
2010-12-07	Dec	summer 10 -11	P70	Eskom	none	Oct mid	present	11	1a	3	6	0	0	0	9	1	8	11	10	10	9.75
2010-12-08	Dec	summer 10 -11	P22	Eskom	none	Oct mid	absent	9	1a	1	3	2	3	0	9	1	9	7	5	0	5.25
2010-12-08	Dec	summer 10 -11	P22	Eskom	none	Oct mid	absent	9	1b	3	3	2	1	0	9	1	7	6	0	0	3.25
2010-12-08	Dec	summer 10 -11	P22	Eskom	none	Oct mid	absent	9	2a	3	6	0	0	0	9	1	10	0	7	6	5.75
2010-12-08	Dec	summer 10 -11	P22	Eskom	none	Oct mid	absent	9	2b	1	5	2	1	0	9	1	12	10	10	0	8
2010-12-08	Dec	summer 10 -11	P22	Eskom	none	Oct mid	absent	9	3a	1	4	1	3	0	9	1	4	9	6	0	4.75
2010-12-08	Dec	summer 10 -11	P22	Eskom	none	Oct mid	absent	9	3b	1	6	2	0	0	9	1	14	10	11	0	8.75
2010-12-08	Dec	summer 10 -11	P22	Eskom	none	Oct mid	absent	9	4a	2	4	1	2	0	9	1	4	0	7	0	2.75
2010-12-08	Dec	summer 10 -11	P22	Eskom	none	Oct mid	absent	9	4b	2	5	0	2	0	9	1	9	12	0	0	5.25
2010-12-08	Dec	summer 10 -11	P22	Eskom	none	Oct mid	absent	9	5a	4	2	0	3	0	9	1	7	10	0	0	4.25
2010-12-08	Dec	summer 10 -11	P22	Eskom	none	Oct mid	absent	9	5b	0	4	0	5	0	9	1	9	0	0	0	2.25
2010-12-08	Dec	summer 10 -11	P22	Eskom	none	Oct mid	absent	9	6a	3	5	0	1	0	9	1	8	0	0	4	3
2010-12-08	Dec	summer 10 -11	P22	Eskom	none	Oct mid	absent	9	6b	1	3	2	3	0	9	1	10	6	0	0	4
2010-12-08	Dec	summer 10 -11	P22	Eskom	none	Oct mid	absent	9	7a	4	2	0	3	0	9	1	9	0	0	0	2.25
2010-12-08	Dec	summer 10 -11	P22	Eskom	none	Oct mid	absent	9	7b	1	2	0	6	0	9	1	12	8	0	0	5
2010-12-08	Dec	summer 10 -11	P22	Eskom	none	Oct mid	absent	9	8a	1	7	0	1	0	9	1	10	10	8	0	7
2010-12-08	Dec	summer 10 -11	P22	Eskom	none	Oct mid	absent	9	8b	1	7	0	1	0	9	1	13	14	10	0	9.25
2010-12-08	Dec	summer 10 -11	P22	Eskom	none	Oct mid	absent	9	9a	1	2	2	4	0	9	1	8	0	0	0	2
2010-12-08	Dec	summer 10 -11	P22	Eskom	none	Oct mid	absent	9	9b	0	8	0	1	0	9	1	11	9	6	3	7.25
2010-12-08	Dec	summer 10 -11	P22	Eskom	none	Oct mid	absent	9	10a	2	4	1	2	0	9	1	5	10	6	0	5.25
2010-12-08	Dec	summer 10 -11	P22	Eskom	none	Oct mid	absent	9	10b	2	4	0	3	0	9	1	8	0	5	0	3.25
2010-12-08	Dec	summer 10 -11	P38	Eskom	heavy	Oct mid	present	12	1a	1	5	2	1	0	9	1	9	7	5	0	5.25
2010-12-08	Dec	summer 10 -11	P38	Eskom	heavy	Oct mid	present	12	1b	3	3	0	3	0	9	1	7	6	0	0	3.25
2010-12-08	Dec	summer 10 -11	P38	Eskom	heavy	Oct mid	present	12	2a	0	5	1	3	0	9	1	10	0	7	6	5.75
2010-12-08	Dec	summer 10 -11	P38	Eskom	heavy	Oct mid	present	12	2b	2	3	0	4	0	9	1	12	10	10	0	8
2010-12-08	Dec	summer 10 -11	P38	Eskom	heavy	Oct mid	present	12	3a	2	3	0	4	0	9	1	4	9	6	0	4.75
2010-12-08	Dec	summer 10 -11	P38	Eskom	heavy	Oct mid	present	12	3b	1	4	2	2	0	9	1	14	10	11	0	8.75
2010-12-08	Dec	summer 10 -11	P38	Eskom	heavy	Oct mid	present	12	4a	2	6	0	1	0	9	1	4	0	7	0	2.75
2010-12-08	Dec	summer 10 -11	P38	Eskom	heavy	Oct mid	present	12	4b	4	4	0	1	0	9	1	9	12	0	0	5.25
2010-12-08	Dec	summer 10 -11	P38	Eskom	heavy	Oct mid	present	12	5a	0	2	6	1	0	9	1	7	10	0	0	4.25
2010-12-08	Dec	summer 10 -11	P38	Eskom	heavy	Oct mid	present	12	5b	0	4	1	4	0	9	1	9	0	0	0	2.25
2010-12-08	Dec	summer 10 -11	P38	Eskom	heavy	Oct mid	present	12	6a	2	1	0	6	0	9	1	8	0	0	4	3
2010-12-08	Dec	summer 10 -11	P38	Eskom	heavy	Oct mid	present	12	6b	1	6	0	2	0	9	1	10	6	0	0	4
2010-12-08	Dec	summer 10 -11	P38	Eskom	heavy	Oct mid	present	12	7a	4	1	0	4	0	9	1	9	0	0	0	2.25
2010-12-08	Dec	summer 10 -11	P38	Eskom	heavy	Oct mid	present	12	7b	1	4	0	4	0	9	1	12	8	0	0	5
2010-12-08	Dec	summer 10 -11	P38	Eskom	heavy	Oct mid	present	12	8a	2	5	0	2	0	9	1	10	10	8	0	7
2010-12-08	Dec	summer 10 -11	P38	Eskom	heavy	Oct mid	present	12	8b	1	3	0	5	0	9	1	13	14	10	0	9.25
2010-12-08	Dec	summer 10 -11	P38	Eskom	heavy	Oct mid	present	12	9a	0	0	0	9	0	9	1	8	0	0	0	2
2010-12-08	Dec	summer 10 -11	P38	Eskom	heavy	Oct mid	present	12	9b	1	1	1	6	0	9	1	11	9	6	3	7.25
2010-12-08	Dec	summer 10 -11	P38	Eskom	heavy	Oct mid	present	12	10a	3	1	2	3	0	9	1	5	10	6	0	5.25
2010-12-08	Dec	summer 10 -11	P38	Eskom	heavy	Oct mid	present	12	10b	3	0	0	6	0	9	1	8	0	5	0	3.25
2010-12-08	Dec	summer 10 -11	P40	Eskom	light	Oct mid	present	7	1a	2	4	1	2	0	9	1	8	5	3	0	4
2010-12-08	Dec	summer 10 -11	P40	Eskom	light	Oct mid	present	7	1b	3	5	0	1	0	9	1	6	5	0	0	2.75
2010-12-08	Dec	summer 10 -11	P40	Eskom	light	Oct mid	present	7	2a	0	8	0	1	0	9	1	11	0	0	0	2.75
2010-12-08	Dec	summer 10 -11	P40	Eskom	light	Oct mid	present	7	2b	0	8	1	0	0	9	1	5	7	7	6	6.25
2010-12-08	Dec	summer 10 -11	P40	Eskom	light	Oct mid	present	7	3a	1	6	0	2	0	9	1	6	5	8	9	7
2010-12-08	Dec	summer 10 -11	P40	Eskom	light	Oct mid	present	7	3b	0	7	0	2	0	9	1	6	4	8	9	6.75
2010-12-08	Dec	summer 10 -11	P40	Eskom	light	Oct mid	present	7	4a	1	4	0	4	0	9	1	7	7	0	0	3.5
2010-12-08	Dec	summer 10 -11	P40	Eskom	light	Oct mid	present	7	4b	1	6	0	2	0	9	1	8	5	0	5	4.5
2010-12-08	Dec	summer 10 -11	P40	Eskom	light	Oct mid	present	7	5a	1	4	0	4	0	9	1	9	4	0	0	3.25
2010-12-08	Dec	summer 10 -11	P40	Eskom	light	Oct mid	present	7	5b	0	6	0	3	0	9	1	6	9	9	5	7.25
2010-12-08	Dec	summer 10 -11	P40	Eskom	light	Oct mid	present	7	6a	1	6	1	1	0	9	1	8	4	0	5	4.25
2010-12-08	Dec	summer 10 -11	P40	Eskom	light	Oct mid	present	7	6b	1	5	2	1	0	9	1	9	4	0	0	3.25
2010-12-08	Dec	summer 10 -11	P40	Eskom	light	Oct mid	present	7	7a	2	4	1	2	0	9	1	6	9	9	5	7.25
2010-12-08	Dec	summer 10 -11	P40	Eskom	light	Oct mid	present	7	7b	0	5	2	2	0	9	1	8	4	0	5	4.25
2010-12-08	Dec	summer 10 -11	P40	Eskom	light	Oct mid	present	7	8a	1	5	1	2	0	9	1	7	10	5	9	7.75
2010-12-08	Dec	summer 10 -11	P40	Eskom	light	Oct mid	present	7	8b	0	7	0	2	0	9	1	0	0	4	6	2.5
2010-12-08	Dec	summer 10 -11	P40	Eskom	light	Oct mid	present	7	9a	0	7	2	0	0	9	1	10	8	8	3	7.25
2010-12-08	Dec	summer 10 -11	P40	Eskom	light	Oct mid	present	7	9b	0	7	1	1	0	9	1	6	7	10	9	8
2010-12-08	Dec	summer 10 -11	P40	Eskom	light	Oct mid	present	7	10a	0	9	0	0	0	9	1	10	6	9	7	8
2010-12-08	Dec	summer 10 -11	P40	Eskom	light	Oct mid	present	7	10b	0	8	0	1	0	9	1	9	6	5	6	6.5
2010-12-08	Dec	summer 10 -11	P42	Eskom	none	Oct mid	absent	11	1a	0	4	1	4	0	9	1	8	5	8	2	5.75
2010-12-08	Dec	summer 10 -11	P42	Eskom	none	Oct mid	absent	11	1b	0	4	4	1	0	9	1	18	6	5	0	7.25
2010-12-08	Dec	summer 10 -11	P42	Eskom	none	Oct mid	absent	11	2a	3	1	0	5	0	9	1	0	9	0	0	2.25
2010-12-08	Dec	summer 10 -11	P42	Eskom	none	Oct mid	absent	11	2b	2	2	0	5	0	9	1	3	0	0	0	0.75
2010-12-08	Dec	summer 10 -11	P42	Eskom	none	Oct mid	absent	11	3a	2	7	0	0	0	9	1	7	12	0	0	4.75
2010-12-08	Dec	summer 10 -11	P42	Eskom	none	Oct mid	absent	11	3b	3	4	0	2	0	9	1	0	6	0	9	3.75
2010-12-08	Dec	summer 10 -11	P42	Eskom	none	Oct mid	absent	11	4a	2	1	1	5	0	9	1	10	0	0	0	2.5
2010-12-08	Dec	summer 10 -11	P42	Eskom	none	Oct mid	absent	11	4b	2	3	0	4	0	9	1	0	0	0	4	1
2010-12-08	Dec	summer 10 -11	P42	Eskom	none	Oct mid	absent	11	5a	2	4	1	2	0	9	1	6	10	6	0	5.5
2010-12-08	Dec	summer 10 -11	P42	Eskom	none	Oct mid	absent	11	5b	3	2	0	4	0	9	1	7	0	0	0	1.75
2010-12-08	Dec	summer 10 -11	P42	Eskom	none	Oct mid	absent	11	6a	0	0	0	9	0	9	1	9	0	0	0	2.25
2010-12-08	Dec	summer 10 -11	P42	Eskom	none	Oct mid	absent	11	6b	2	4	0	3	0	9	1	6	6	0	0	3
2010-12-08	Dec	summer 10 -11	P42	Eskom	none	Oct mid	absent	11	7a	3	0	0	6	0	9	1	5	0	0	0	1.25
2010-12-08	Dec	summer 10 -11	P42	Eskom	none	Oct mid	absent	11	7b	1	1	0	7	0	9	1	10	0	0	0	2.5
2010-12-08	Dec	summer 10 -11	P42	Eskom	none	Oct mid	absent	11	8a	0	7	0	2	0	9	1	9	12	6	4	7.75
2010-12-08	Dec	summer 10 -11	P42	Eskom	none	Oct mid	absent	11	8b	0	7	0	2	0	9	1	10	8	5	10	8.25
2010-12-08	Dec	summer 10 -11	P42	Eskom	none	Oct mid	absent	11	9a	1	5	0	3	0	9	1	13	10	17	10	12.5
2010-12-08	Dec	summer 10 -11	P42	Eskom	none	Oct mid	absent	11	9b	0	6	0	3	0	9	1	10	10	6	9	8.75
2010-12-08	Dec	summer 10 -11	P42	Eskom	none	Oct mid	absent	11	10a	4	2	0	3	0	9	1	6	0	0	0	1.5
2010-12-08	Dec	summer 10 -11	P42	Eskom	none	Oct mid	absent	11	10b	1	6	0	2	0	9	1	13	0	9	7	7.25
2010-12-09	Dec	summer 10 -11	P63	Private	heavy	Sept late	absent	9	1a	3	1	0	5	0	9	1	4	0	0	0	1
2010-12-09	Dec	summer 10 -11	P63	Private	heavy	Sept late	absent	9	1b	2	3	1	3	0	9	1	0	3	0	3	1.5
2010-12-09	Dec	summer 10 -11	P63	Private	heavy	Sept late	absent	9	2a	1	3	2	3	0	9	1	6	0	6	4	4
2010-12-09	Dec	summer 10 -11	P63	Private	heavy	Sept late	absent	9	2b	0	6	1	2	0	9	1	7	4	0	5	4
2010-12-09	Dec	summer 10 -11	P63	Private	heavy	Sept late	absent	9	3a	0	7	1	1	0	9	1	3	3	5	4	3.75
2010-12-09	Dec	summer 10 -11	P63	Private	heavy	Sept late	absent	9	3b	0	5	1	3	0	9	1	3	3	5	4	3.75
2010-12-09	Dec	summer 10 -11	P63	Private	heavy	Sept late	absent	9	4a	1	7	0	1	0	9	1	8	5	4	6	5.75
2010-12-09	Dec	summer 10 -11	P63	Private	heavy	Sept late	absent	9	4b	1	7	0	1	0	9	1	5	4	3	0	3
2010-12-09	Dec	summer 10 -11	P63	Private	heavy	Sept late	absent	9	5a	2	5	1	1	0	9	1	5	5	8	10	7
2010-12-09	Dec	summer 10 -11	P63	Private	heavy	Sept late	absent	9	5b	0	8	1	0	0	9	1	17	8	10	10	11.25
2010-12-09	Dec	summer 10 -11	P63	Private	heavy	Sept late	absent	9	6a	6	3	0	0	0	9	1	22	12	16	16	16.5
2010-12-09	Dec	summer 10 -11	P63	Private	heavy	Sept late	absent	9	6b	1	5	0	3	0	9	1	10	13	6	0	7.25
2010-12-09	Dec	summer 10 -11	P63	Private	heavy	Sept late	absent	9	7a	2	6	0	1	0	9	1	7	8	8	2	6.25
2010-12-09	Dec	summer 10 -11	P63	Private	heavy	Sept late	absent	9	7b	2	7	0	0	0	9	1	5	8	5	4	5.5
2010-12-09	Dec	summer 10 -11	P63	Private	heavy	Sept late	absent	9	8a	1	5	0	3	0	9	1	0	4	6	7	4.25
2010-12-09	Dec	summer 10 -11	P63	Private	heavy	Sept late	absent	9	8b	0	4	2	3	0	9	1	6	3	4	0	3.25
2010-12-09	Dec	summer 10 -11	P63	Private	heavy	Sept late	absent	9	9a	1	8	0	0	0	9	1	9	7	5	5	6.5
2010-12-09	Dec	summer 10 -11	P63	Private	heavy	Sept late	absent	9	9b	0	9	0	0	0	9	1	14	20	10	6	12.5
2010-12-09	Dec	summer 10 -11	P63	Private	heavy	Oct mid	absent	9	10a	1	2	1	5	0	9	1	4	3	0	0	1.75
2010-12-09	Dec	summer 10 -11	P63	Private	heavy	Oct mid	absent	9	10b	0	1	1	7	0	9	1	5	0	0	0	1.25
2010-12-09	Dec	summer 10 -11	P64	Private	none	Sept late	absent	6	1a	0	2	2	5	0	9	1	4	7	0	0	2.75
2010-12-09	Dec	summer 10 -11	P64	Private	none	Sept late	absent	6	1b	1	1	1	6	0	9	1	0	0	7	0	1.75
2010-12-09	Dec	summer 10 -11	P64	Private	none	Sept late	absent	6	2a	2	2	0	5	0	9	1	5	4	0	0	2.25
2010-12-09	Dec	summer 10 -11	P64	Private	none	Sept late	absent	6	2b	3	1	1	4	0	9	1	7	0	0	0	1.75
2010-12-09	Dec	summer 10 -11	P64	Private	none	Sept late	absent	6	3a	2	3	0	4	0	9	1	5	7	0	0	3
2010-12-09	Dec	summer 10 -11	P64	Private	none	Sept late	absent	6	3b	3	4	0	2	0	9	1	10	8	8	0	6.5
2010-12-09	Dec	summer 10 -11	P64	Private	none	Sept late	absent	6	4a	4	2	0	3	0	9	1	9	6	0	4	4.75
2010-12-09	Dec	summer 10 -11	P64	Private	none	Sept late	absent	6	4b	3	3	0	3	0	9	1	10	13	0	0	5.75
2010-12-09	Dec	summer 10 -11	P64	Private	none	Sept late	absent	6	5a	1	6	0	2	0	9	1	10	13	0	10	8.25
2010-12-09	Dec	summer 10 -11	P64	Private	none	Sept late	absent	6	5b	3	6	0	0	0	9	1	10	8	0	8	6.5
2010-12-09	Dec	summer 10 -11	P64	Private	none	Sept late	absent	6	6a	7	2	0	0	0	9	1	11	0	0	0	2.75
2010-12-09	Dec	summer 10 -11	P64	Private	none	Sept late	absent	6	6b	7	2	0	0	0	9	1	12	0	0	0	3
2010-12-09	Dec	summer 10 -11	P64	Private	none	Sept late	absent	6	7a	6	3	0	0	0	9	1	9	0	0	0	2.25
2010-12-09	Dec	summer 10 -11	P64	Private	none	Sept late	absent	6	7b	4	3	0	2	0	9	1	15	8	0	0	5.75
2010-12-09	Dec	summer 10 -11	P64	Private	none	Sept late	absent	6	8a	4	5	0	0	0	9	1	12	9	0	0	5.25
2010-12-09	Dec	summer 10 -11	P64	Private	none	Sept late	absent	6	8b	4	4	1	0	0	9	1	8	17	0	0	6.25
2010-12-09	Dec	summer 10 -11	P64	Private	none	Sept late	absent	6	9a	2	5	0	2	0	9	1	14	0	0	0	3.5
2010-12-09	Dec	summer 10 -11	P64	Private	none	Sept late	absent	6	9b	2	5	0	2	0	9	1	8	12	5	0	6.25
2010-12-09	Dec	summer 10 -11	P64	Private	none	Sept late	absent	6	10a	3	4	1	1	0	9	1	13	12	0	0	6.25
2010-12-09	Dec	summer 10 -11	P64	Private	none	Sept late	absent	6	10b	6	3	0	0	0	9	1	11	0	0	0	2.75
2010-12-09	Dec	summer 10 -11	P65	Eskom	none	Sept late	present	7	1a	0	9	0	0	0	9	1	18	10	12	15	13.75
2010-12-09	Dec	summer 10 -11	P65	Eskom	none	Sept late	present	7	1b	0	9	0	0	0	9	1	26	20	12	17	18.75
2010-12-09	Dec	summer 10 -11	P65	Eskom	none	Sept late	present	7	2a	5	4	0	0	0	9	1	14	13	0	0	6.75
2010-12-09	Dec	summer 10 -11	P65	Eskom	none	Sept late	present	7	2b	3	3	0	3	0	9	1	13	9	0	0	5.5
2010-12-09	Dec	summer 10 -11	P65	Eskom	none	Sept late	present	7	3a	3	5	1	0	0	9	1	13	16	0	9	9.5
2010-12-09	Dec	summer 10 -11	P65	Eskom	none	Sept late	present	7	3b	2	6	1	0	0	9	1	22	12	0	0	8.5
2010-12-09	Dec	summer 10 -11	P65	Eskom	none	Sept late	present	7	4a	0	9	0	0	0	9	1	20	33	19	18	22.5
2010-12-09	Dec	summer 10 -11	P65	Eskom	none	Sept late	present	7	4b	0	9	0	0	0	9	1	21	14	26	29	22.5
2010-12-09	Dec	summer 10 -11	P65	Eskom	none	Sept late	present	7	5a	1	8	0	0	0	9	1	19	15	10	0	11
2010-12-09	Dec	summer 10 -11	P65	Eskom	none	Sept late	present	7	5b	6	2	0	1	0	9	1	10	7	0	0	4.25
2010-12-09	Dec	summer 10 -11	P65	Eskom	none	Sept late	present	7	6a	0	9	0	0	0	9	1	18	27	24	17	21.5
2010-12-09	Dec	summer 10 -11	P65	Eskom	none	Sept late	present	7	6b	2	7	0	0	0	9	1	13	24	16	0	13.25
2010-12-09	Dec	summer 10 -11	P65	Eskom	none	Sept late	present	7	7a	0	9	0	0	0	9	1	32	23	18	13	21.5
2010-12-09	Dec	summer 10 -11	P65	Eskom	none	Sept late	present	7	7b	0	9	0	0	0	9	1	19	21	22	16	19.5
2010-12-09	Dec	summer 10 -11	P65	Eskom	none	Sept late	present	7	8a	0	8	1	0	0	9	1	21	19	21	16	19.25
2010-12-09	Dec	summer 10 -11	P65	Eskom	none	Sept late	present	7	8b	0	9	0	0	0	9	1	34	31	28	30	30.75
2010-12-09	Dec	summer 10 -11	P65	Eskom	none	Sept late	present	7	9a	0	2	1	6	0	9	1	19	0	6	0	6.25
2010-12-09	Dec	summer 10 -11	P65	Eskom	none	Sept late	present	7	9b	0	8	0	1	0	9	1	10	7	9	8	8.5
2010-12-09	Dec	summer 10 -11	P65	Eskom	none	Sept late	present	7	10a	3	3	0	3	0	9	1	0	4	3	6	3.25
2010-12-09	Dec	summer 10 -11	P65	Eskom	none	Sept late	present	7	10b	4	1	1	3	0	9	1	0	0	6	0	1.5
2011-11-16	Nov	summer 11 - 12	P10	Private	heavy	Sept early	present	5	1a	0	7	1	1	0	9	1	5	0	6	0	2.75
2011-11-16	Nov	summer 11 - 12	P10	Private	heavy	Sept early	present	5	1b	0	6	2	1	0	9	1	10	8	12	0	7.5
2011-11-16	Nov	summer 11 - 12	P10	Private	heavy	Sept early	present	5	2a	3	3	1	2	0	9	1	2	0	7	0	2.25
2011-11-16	Nov	summer 11 - 12	P10	Private	heavy	Sept early	present	5	2b	4	5	0	0	0	9	1	0	5	0	2	1.75
2011-11-16	Nov	summer 11 - 12	P10	Private	heavy	Sept early	present	5	3a	4	4	0	1	0	9	1	0	9	0	7	4
2011-11-16	Nov	summer 11 - 12	P10	Private	heavy	Sept early	present	5	3b	0	7	1	1	0	9	1	11	4	0	6	5.25
2011-11-16	Nov	summer 11 - 12	P10	Private	heavy	Sept early	present	5	4a	3	3	0	3	0	9	1	7	3	0	4	3.5
2011-11-16	Nov	summer 11 - 12	P10	Private	heavy	Sept early	present	5	4b	2	2	1	4	0	9	1	0	0	0	5	1.25
2011-11-16	Nov	summer 11 - 12	P10	Private	heavy	Sept early	present	5	5a	3	3	1	2	0	9	1	4	3	0	9	4
2011-11-16	Nov	summer 11 - 12	P10	Private	heavy	Sept early	present	5	5b	1	7	0	1	0	9	1	3	0	0	8	2.75
2011-11-16	Nov	summer 11 - 12	P10	Private	heavy	Sept early	present	5	6a	2	6	0	1	0	9	1	6	5	0	4	3.75
2011-11-16	Nov	summer 11 - 12	P10	Private	heavy	Sept early	present	5	6b	5	3	1	0	0	9	1	0	2	0	11	3.25
2011-11-16	Nov	summer 11 - 12	P10	Private	heavy	Sept early	present	5	7a	1	0	3	5	0	9	1	0	0	6	0	1.5
2011-11-16	Nov	summer 11 - 12	P10	Private	heavy	Sept early	present	5	7b	4	1	2	2	0	9	1	9	0	5	0	3.5
2011-11-16	Nov	summer 11 - 12	P10	Private	heavy	Sept early	present	5	8a	0	7	1	1	0	9	1	13	0	8	11	8
2011-11-16	Nov	summer 11 - 12	P10	Private	heavy	Sept early	present	5	8b	2	6	0	1	0	9	1	0	0	3	6	2.25
2011-11-16	Nov	summer 11 - 12	P10	Private	heavy	Sept early	present	5	9a	3	5	0	1	0	9	1	0	4	0	3	1.75
2011-11-16	Nov	summer 11 - 12	P10	Private	heavy	Sept early	present	5	9b	1	7	0	1	0	9	1	6	7	0	8	5.25
2011-11-16	Nov	summer 11 - 12	P10	Private	heavy	Sept early	present	5	10a	0	6	0	3	0	9	1	0	9	11	0	5
2011-11-16	Nov	summer 11 - 12	P10	Private	heavy	Sept early	present	5	10b	1	6	0	2	0	9	1	3	6	13	5	6.75
2011-11-16	Nov	summer 11 - 12	P39	Eskom	none	Aug late	present	4	1a	0	5	0	4	0	9	1	10	5	10	6	7.75
2011-11-16	Nov	summer 11 - 12	P39	Eskom	none	Aug late	present	4	1b	1	5	0	3	0	9	1	10	8	0	7	6.25
2011-11-16	Nov	summer 11 - 12	P39	Eskom	none	Aug late	present	4	2a	3	4	1	1	0	9	1	3	6	8	7	6
2011-11-16	Nov	summer 11 - 12	P39	Eskom	none	Aug late	present	4	2b	1	7	0	1	0	9	1	6	4	0	13	5.75
2011-11-16	Nov	summer 11 - 12	P39	Eskom	none	Aug late	present	4	3a	1	8	0	0	0	9	1	8	4	4	5	5.25
2011-11-16	Nov	summer 11 - 12	P39	Eskom	none	Aug late	present	4	3b	3	4	0	2	0	9	1	3	12	6	5	6.5
2011-11-16	Nov	summer 11 - 12	P39	Eskom	none	Aug late	present	4	4a	1	5	0	3	0	9	1	6	11	7	5	7.25
2011-11-16	Nov	summer 11 - 12	P39	Eskom	none	Aug late	present	4	4b	1	6	0	2	0	9	1	0	0	4	8	3
2011-11-16	Nov	summer 11 - 12	P39	Eskom	none	Aug late	present	4	5a	1	3	0	5	0	9	1	0	0	0	4	1
2011-11-16	Nov	summer 11 - 12	P39	Eskom	none	Aug late	present	4	5b	3	3	0	3	0	9	1	3	0	6	0	2.25
2011-11-16	Nov	summer 11 - 12	P39	Eskom	none	Aug late	present	4	6a	4	4	0	1	0	9	1	5	6	6	10	6.75
2011-11-16	Nov	summer 11 - 12	P39	Eskom	none	Aug late	present	4	6b	2	3	0	4	0	9	1	4	0	6	0	2.5
2011-11-16	Nov	summer 11 - 12	P39	Eskom	none	Aug late	present	4	7a	0	4	0	5	0	9	1	0	5	10	11	6.5
2011-11-16	Nov	summer 11 - 12	P39	Eskom	none	Aug late	present	4	7b	1	7	0	1	0	9	1	8	5	11	7	7.75
2011-11-16	Nov	summer 11 - 12	P39	Eskom	none	Aug late	present	4	8a	1	8	0	0	0	9	1	6	7	6	4	5.75
2011-11-16	Nov	summer 11 - 12	P39	Eskom	none	Aug late	present	4	8b	4	3	0	2	0	9	1	5	8	8	0	5.25
2011-11-16	Nov	summer 11 - 12	P39	Eskom	none	Aug late	present	4	9a	0	5	0	4	0	9	1	9	8	0	4	5.25
2011-11-16	Nov	summer 11 - 12	P39	Eskom	none	Aug late	present	4	9b	0	0	0	0	9	9	1	0	0	0	0	0
2011-11-16	Nov	summer 11 - 12	P39	Eskom	none	Aug late	present	4	10a	1	2	0	6	0	9	1	0	0	5	10	3.75
2011-11-16	Nov	summer 11 - 12	P39	Eskom	none	Aug late	present	4	10b	2	6	0	1	0	9	1	5	6	6	0	4.25
2011-11-16	Nov	summer 11 - 12	P41	Eskom	none	Aug late	present	4	1a	3	4	0	2	0	9	1	4	7	0	5	4
2011-11-16	Nov	summer 11 - 12	P41	Eskom	none	Aug late	present	4	1b	4	4	0	1	0	9	1	15	0	4	0	4.75
2011-11-16	Nov	summer 11 - 12	P41	Eskom	none	Aug late	present	4	2a	4	2	0	3	0	9	1	0	0	0	8	2
2011-11-16	Nov	summer 11 - 12	P41	Eskom	none	Aug late	present	4	2b	0	7	0	2	0	9	1	9	11	4	0	6
2011-11-16	Nov	summer 11 - 12	P41	Eskom	none	Aug late	present	4	3a	2	1	0	6	0	9	1	0	9	7	9	6.25
2011-11-16	Nov	summer 11 - 12	P41	Eskom	none	Aug late	present	4	3b	3	1	0	5	0	9	1	7	6	0	5	4.5
2011-11-16	Nov	summer 11 - 12	P41	Eskom	none	Aug late	present	4	4a	3	3	0	3	0	9	1	9	7	0	11	6.75
2011-11-16	Nov	summer 11 - 12	P41	Eskom	none	Aug late	present	4	4b	2	0	2	5	0	9	1	13	0	0	0	3.25
2011-11-16	Nov	summer 11 - 12	P41	Eskom	none	Aug late	present	4	5a	1	5	0	3	0	9	1	5	0	3	5	3.25
2011-11-16	Nov	summer 11 - 12	P41	Eskom	none	Aug late	present	4	5b	4	1	0	4	0	9	1	7	0	0	0	1.75
2011-11-16	Nov	summer 11 - 12	P41	Eskom	none	Aug late	present	4	6a	1	7	0	1	0	9	1	6	5	5	0	4
2011-11-16	Nov	summer 11 - 12	P41	Eskom	none	Aug late	present	4	6b	1	2	0	6	0	9	1	9	3	7	4	5.75
2011-11-16	Nov	summer 11 - 12	P41	Eskom	none	Aug late	present	4	7a	0	4	0	5	0	9	1	5	5	3	0	3.25
2011-11-16	Nov	summer 11 - 12	P41	Eskom	none	Aug late	present	4	7b	2	3	0	4	0	9	1	10	0	13	6	7.25
2011-11-16	Nov	summer 11 - 12	P41	Eskom	none	Aug late	present	4	8a	1	6	0	2	0	9	1	7	6	6	3	5.5
2011-11-16	Nov	summer 11 - 12	P41	Eskom	none	Aug late	present	4	8b	6	3	0	0	0	9	1	12	0	0	0	3
2011-11-16	Nov	summer 11 - 12	P41	Eskom	none	Aug late	present	4	9a	2	2	1	4	0	9	1	0	11	14	8	8.25
2011-11-16	Nov	summer 11 - 12	P41	Eskom	none	Aug late	present	4	9b	1	6	0	2	0	9	1	4	7	7	10	7
2011-11-16	Nov	summer 11 - 12	P41	Eskom	none	Aug late	present	4	10a	3	5	0	1	0	9	1	6	4	6	0	4
2011-11-16	Nov	summer 11 - 12	P41	Eskom	none	Aug late	present	4	10b	0	5	0	4	0	9	1	17	5	7	9	9.5
2011-11-16	Nov	summer 11 - 12	P70	Eskom	none	not burned	present	7	1a	0	9	0	0	0	9	1	34	26	18	24	25.5
2011-11-16	Nov	summer 11 - 12	P70	Eskom	none	not burned	present	7	1b	0	9	0	0	0	9	1	15	22	10	36	20.75
2011-11-16	Nov	summer 11 - 12	P70	Eskom	none	not burned	present	7	2a	0	9	0	0	0	9	1	39	26	29	20	28.5
2011-11-16	Nov	summer 11 - 12	P70	Eskom	none	not burned	present	7	2b	1	8	0	0	0	9	1	19	0	24	18	15.25
2011-11-16	Nov	summer 11 - 12	P70	Eskom	none	not burned	present	7	3a	2	6	0	1	0	9	1	20	18	28	12	19.5
2011-11-16	Nov	summer 11 - 12	P70	Eskom	none	not burned	present	7	3b	0	9	0	0	0	9	1	10	3	25	9	11.75
2011-11-16	Nov	summer 11 - 12	P70	Eskom	none	not burned	present	7	4a	0	9	0	0	0	9	1	24	18	38	35	28.75
2011-11-16	Nov	summer 11 - 12	P70	Eskom	none	not burned	present	7	4b	1	8	0	0	0	9	1	27	14	21	30	23
2011-11-16	Nov	summer 11 - 12	P70	Eskom	none	not burned	present	7	5a	0	9	0	0	0	9	1	30	10	20	22	20.5
2011-11-16	Nov	summer 11 - 12	P70	Eskom	none	not burned	present	7	5b	0	9	0	0	0	9	1	33	24	22	36	28.75
2011-11-16	Nov	summer 11 - 12	P70	Eskom	none	not burned	present	7	6a	0	9	0	0	0	9	1	24	19	36	20	24.75
2011-11-16	Nov	summer 11 - 12	P70	Eskom	none	not burned	present	7	6b	1	8	0	0	0	9	1	13	11	17	22	15.75
2011-11-16	Nov	summer 11 - 12	P70	Eskom	none	not burned	present	7	7a	0	9	0	0	0	9	1	23	20	17	28	22
2011-11-16	Nov	summer 11 - 12	P70	Eskom	none	not burned	present	7	7b	0	9	0	0	0	9	1	46	37	48	30	40.25
2011-11-16	Nov	summer 11 - 12	P70	Eskom	none	not burned	present	7	8a	0	9	0	0	0	9	1	26	24	28	33	27.75
2011-11-16	Nov	summer 11 - 12	P70	Eskom	none	not burned	present	7	8b	0	9	0	0	0	9	1	27	24	17	24	23
2011-11-16	Nov	summer 11 - 12	P70	Eskom	none	not burned	present	7	9a	0	9	0	0	0	9	1	26	30	20	20	24
2011-11-16	Nov	summer 11 - 12	P70	Eskom	none	not burned	present	7	9b	0	9	0	0	0	9	1	3	31	32	25	22.75
2011-11-16	Nov	summer 11 - 12	P70	Eskom	none	not burned	present	7	10a	1	7	1	0	0	9	1	25	30	20	26	25.25
2011-11-16	Nov	summer 11 - 12	P70	Eskom	none	not burned	present	7	10b	0	9	0	0	0	9	1	40	16	19	30	26.25
2011-11-17	Nov	summer 11 - 12	P01	Eskom	none	Oct mid	present	11	1a	2	2	3	2	0	9	1	8	10	6	0	6
2011-11-17	Nov	summer 11 - 12	P01	Eskom	none	Oct mid	present	11	1b	3	2	1	3	0	9	1	0	0	13	7	5
2011-11-17	Nov	summer 11 - 12	P01	Eskom	none	Oct mid	present	11	2a	0	5	0	4	0	9	1	10	6	8	0	6
2011-11-17	Nov	summer 11 - 12	P01	Eskom	none	Oct mid	present	11	2b	4	3	0	2	0	9	1	11	7	0	12	7.5
2011-11-17	Nov	summer 11 - 12	P01	Eskom	none	Oct mid	present	11	3a	0	4	0	5	0	9	1	0	0	9	7	4
2011-11-17	Nov	summer 11 - 12	P01	Eskom	none	Oct mid	present	11	3b	2	7	0	0	0	9	1	0	14	8	6	7
2011-11-17	Nov	summer 11 - 12	P01	Eskom	none	Oct mid	present	11	4a	2	3	1	3	0	9	1	9	4	14	0	6.75
2011-11-17	Nov	summer 11 - 12	P01	Eskom	none	Oct mid	present	11	4b	5	2	0	2	0	9	1	11	9	4	6	7.5
2011-11-17	Nov	summer 11 - 12	P01	Eskom	none	Oct mid	present	11	5a	2	3	0	4	0	9	1	13	2	0	3	4.5
2011-11-17	Nov	summer 11 - 12	P01	Eskom	none	Oct mid	present	11	5b	5	1	0	3	0	9	1	10	5	4	9	7
2011-11-17	Nov	summer 11 - 12	P01	Eskom	none	Oct mid	present	11	6a	5	4	0	0	0	9	1	10	6	0	0	4
2011-11-17	Nov	summer 11 - 12	P01	Eskom	none	Oct mid	present	11	6b	5	3	0	1	0	9	1	10	4	0	0	3.5
2011-11-17	Nov	summer 11 - 12	P01	Eskom	none	Oct mid	present	11	7a	7	2	0	0	0	9	1	3	6	0	0	2.25
2011-11-17	Nov	summer 11 - 12	P01	Eskom	none	Oct mid	present	11	7b	5	3	1	0	0	9	1	12	7	0	0	4.75
2011-11-17	Nov	summer 11 - 12	P01	Eskom	none	Oct mid	present	11	8a	3	4	0	2	0	9	1	8	0	4	3	3.75
2011-11-17	Nov	summer 11 - 12	P01	Eskom	none	Oct mid	present	11	8b	2	5	2	0	0	9	1	5	6	0	0	2.75
2011-11-17	Nov	summer 11 - 12	P01	Eskom	none	Oct mid	present	11	9a	5	4	0	0	0	9	1	13	0	3	0	4
2011-11-17	Nov	summer 11 - 12	P01	Eskom	none	Oct mid	present	11	9b	3	6	0	0	0	9	1	6	4	4	0	3.5
2011-11-17	Nov	summer 11 - 12	P01	Eskom	none	Oct mid	present	11	10a	4	3	0	2	0	9	1	8	0	0	0	2
2011-11-17	Nov	summer 11 - 12	P01	Eskom	none	Oct mid	present	11	10b	4	1	0	4	0	9	1	6	0	0	0	1.5
2011-11-17	Nov	summer 11 - 12	P38	Eskom	none	Oct mid	present	9	1a	1	1	0	7	0	9	1	3	0	0	0	0.75
2011-11-17	Nov	summer 11 - 12	P38	Eskom	none	Oct mid	present	9	1b	3	2	0	4	0	9	1	3	2	0	0	1.25
2011-11-17	Nov	summer 11 - 12	P38	Eskom	none	Oct mid	present	9	2a	2	0	0	7	0	9	1	0	0	0	6	1.5
2011-11-17	Nov	summer 11 - 12	P38	Eskom	none	Oct mid	present	9	2b	0	2	5	2	0	9	1	5	3	0	0	2
2011-11-17	Nov	summer 11 - 12	P38	Eskom	none	Oct mid	present	9	3a	0	1	0	8	0	9	1	3	2	0	0	1.25
2011-11-17	Nov	summer 11 - 12	P38	Eskom	none	Oct mid	present	9	3b	0	5	0	4	0	9	1	0	6	2	3	2.75
2011-11-17	Nov	summer 11 - 12	P38	Eskom	none	Oct mid	present	9	4a	0	6	3	0	0	9	1	11	7	3	3	6
2011-11-17	Nov	summer 11 - 12	P38	Eskom	none	Oct mid	present	9	4b	0	9	0	0	0	9	1	4	4	3	2	3.25
2011-11-17	Nov	summer 11 - 12	P38	Eskom	none	Oct mid	present	9	5a	1	0	6	0	2	9	1	10	7	5	8	7.5
2011-11-17	Nov	summer 11 - 12	P38	Eskom	none	Oct mid	present	9	5b	0	8	0	1	0	9	1	8	4	6	6	6
2011-11-17	Nov	summer 11 - 12	P38	Eskom	none	Oct mid	present	9	6a	2	0	0	7	0	9	1	0	4	0	0	1
2011-11-17	Nov	summer 11 - 12	P38	Eskom	none	Oct mid	present	9	6b	0	0	0	9	0	9	1	0	3	3	0	1.5
2011-11-17	Nov	summer 11 - 12	P38	Eskom	none	Oct mid	present	9	7a	1	4	0	4	0	9	1	5	3	4	2	3.5
2011-11-17	Nov	summer 11 - 12	P38	Eskom	none	Oct mid	present	9	7b	1	3	0	5	0	9	1	2	3	2	4	2.75
2011-11-17	Nov	summer 11 - 12	P38	Eskom	none	Oct mid	present	9	8a	3	3	0	3	0	9	1	3	7	4	0	3.5
2011-11-17	Nov	summer 11 - 12	P38	Eskom	none	Oct mid	present	9	8b	2	6	0	1	0	9	1	3	4	5	0	3
2011-11-17	Nov	summer 11 - 12	P38	Eskom	none	Oct mid	present	9	9a	2	3	0	4	0	9	1	4	5	7	8	6
2011-11-17	Nov	summer 11 - 12	P38	Eskom	none	Oct mid	present	9	9b	4	3	0	2	0	9	1	5	7	0	4	4
2011-11-17	Nov	summer 11 - 12	P38	Eskom	none	Oct mid	present	9	10a	2	2	3	2	0	9	1	5	3	6	3	4.25
2011-11-17	Nov	summer 11 - 12	P38	Eskom	none	Oct mid	present	9	10b	3	3	0	3	0	9	1	0	0	9	7	4
2011-11-17	Nov	summer 11 - 12	P40	Eskom	none	Aug late	present	7	1a	2	5	0	2	0	9	1	5	7	3	0	3.75
2011-11-17	Nov	summer 11 - 12	P40	Eskom	none	Aug late	present	7	1b	3	5	0	1	0	9	1	4	7	5	5	5.25
2011-11-17	Nov	summer 11 - 12	P40	Eskom	none	Aug late	present	7	2a	0	6	0	3	0	9	1	9	3	7	5	6
2011-11-17	Nov	summer 11 - 12	P40	Eskom	none	Aug late	present	7	2b	2	6	0	1	0	9	1	0	11	5	4	5
2011-11-17	Nov	summer 11 - 12	P40	Eskom	none	Aug late	present	7	3a	1	5	0	3	0	9	1	4	6	4	5	4.75
2011-11-17	Nov	summer 11 - 12	P40	Eskom	none	Aug late	present	7	3b	1	5	2	1	0	9	1	8	3	3	4	4.5
2011-11-17	Nov	summer 11 - 12	P40	Eskom	none	Aug late	present	7	4a	1	2	1	5	0	9	1	0	0	7	0	1.75
2011-11-17	Nov	summer 11 - 12	P40	Eskom	none	Aug late	present	7	4b	3	3	2	1	0	9	1	5	0	0	0	1.25
2011-11-17	Nov	summer 11 - 12	P40	Eskom	none	Aug late	present	7	5a	1	4	1	3	0	9	1	10	4	8	0	5.5
2011-11-17	Nov	summer 11 - 12	P40	Eskom	none	Aug late	present	7	5b	0	5	4	0	0	9	1	6	5	6	7	6
2011-11-17	Nov	summer 11 - 12	P40	Eskom	none	Aug late	present	7	6a	0	6	0	3	0	9	1	12	5	7	6	7.5
2011-11-17	Nov	summer 11 - 12	P40	Eskom	none	Aug late	present	7	6b	0	1	0	8	0	9	1	6	0	0	0	1.5
2011-11-17	Nov	summer 11 - 12	P40	Eskom	none	Aug late	present	7	7a	0	7	0	2	0	9	1	5	0	3	4	3
2011-11-17	Nov	summer 11 - 12	P40	Eskom	none	Aug late	present	7	7b	5	4	0	0	0	9	1	5	6	0	4	3.75
2011-11-17	Nov	summer 11 - 12	P40	Eskom	none	Aug late	present	7	8a	2	4	0	3	0	9	1	8	0	0	11	4.75
2011-11-17	Nov	summer 11 - 12	P40	Eskom	none	Aug late	present	7	8b	4	5	0	0	0	9	1	9	0	13	10	8
2011-11-17	Nov	summer 11 - 12	P40	Eskom	none	Aug late	present	7	9a	0	2	0	7	0	9	1	8	0	0	0	2
2011-11-17	Nov	summer 11 - 12	P40	Eskom	none	Aug late	present	7	9b	4	1	0	4	0	9	1	7	0	0	10	4.25
2011-11-17	Nov	summer 11 - 12	P40	Eskom	none	Aug late	present	7	10a	0	7	0	2	0	9	1	4	9	6	7	6.5
2011-11-17	Nov	summer 11 - 12	P40	Eskom	none	Aug late	present	7	10b	0	7	0	2	0	9	1	6	6	4	5	5.25
2011-11-17	Nov	summer 11 - 12	P50	Private	heavy	July late	absent	7	1a	1	2	0	6	0	9	1	6	4	0	0	2.5
2011-11-17	Nov	summer 11 - 12	P50	Private	heavy	July late	absent	7	1b	5	4	0	0	0	9	1	0	6	8	4	4.5
2011-11-17	Nov	summer 11 - 12	P50	Private	heavy	July late	absent	7	2a	1	1	3	4	0	9	1	0	0	14	3	4.25
2011-11-17	Nov	summer 11 - 12	P50	Private	heavy	July late	absent	7	2b	6	2	1	0	0	9	1	2	5	0	5	3
2011-11-17	Nov	summer 11 - 12	P50	Private	heavy	July late	absent	7	3a	1	3	0	5	0	9	1	7	9	0	2	4.5
2011-11-17	Nov	summer 11 - 12	P50	Private	heavy	July late	absent	7	3b	4	2	0	3	0	9	1	8	0	0	0	2
2011-11-17	Nov	summer 11 - 12	P50	Private	heavy	July late	absent	7	4a	5	4	0	0	0	9	1	10	0	0	6	4
2011-11-17	Nov	summer 11 - 12	P50	Private	heavy	July late	absent	7	4b	4	3	0	2	0	9	1	11	7	0	14	8
2011-11-17	Nov	summer 11 - 12	P50	Private	heavy	July late	absent	7	5a	1	8	0	0	0	9	1	9	11	11	0	7.75
2011-11-17	Nov	summer 11 - 12	P50	Private	heavy	July late	absent	7	5b	2	6	0	1	0	9	1	13	0	0	6	4.75
2011-11-17	Nov	summer 11 - 12	P50	Private	heavy	July late	absent	7	6a	3	2	1	3	0	9	1	4	5	14	0	5.75
2011-11-17	Nov	summer 11 - 12	P50	Private	heavy	July late	absent	7	6b	3	3	0	3	0	9	1	7	3	7	9	6.5
2011-11-17	Nov	summer 11 - 12	P50	Private	heavy	July late	absent	7	7a	0	7	1	1	0	9	1	9	7	4	0	5
2011-11-17	Nov	summer 11 - 12	P50	Private	heavy	July late	absent	7	7b	2	4	2	1	0	9	1	6	6	8	2	5.5
2011-11-17	Nov	summer 11 - 12	P50	Private	heavy	July late	absent	7	8a	3	2	1	3	0	9	1	15	8	10	0	8.25
2011-11-17	Nov	summer 11 - 12	P50	Private	heavy	July late	absent	7	8b	1	4	3	1	0	9	1	11	0	5	0	4
2011-11-17	Nov	summer 11 - 12	P50	Private	heavy	July late	absent	7	9a	5	2	0	2	0	9	1	9	12	0	0	5.25
2011-11-17	Nov	summer 11 - 12	P50	Private	heavy	July late	absent	7	9b	3	3	0	3	0	9	1	0	10	0	7	4.25
2011-11-17	Nov	summer 11 - 12	P50	Private	heavy	July late	absent	7	10a	6	3	0	0	0	9	1	0	0	6	12	4.5
2011-11-17	Nov	summer 11 - 12	P50	Private	heavy	July late	absent	7	10b	2	4	0	3	0	9	1	5	0	6	12	5.75
2011-11-17	Nov	summer 11 - 12	P57	Private	heavy	Aug mid	absent	1	1a	0	7	0	2	0	9	1	4	3	0	4	2.75
2011-11-17	Nov	summer 11 - 12	P57	Private	heavy	Aug mid	absent	1	1b	1	6	1	1	0	9	1	6	4	2	5	4.25
2011-11-17	Nov	summer 11 - 12	P57	Private	heavy	Aug mid	absent	1	2a	0	1	6	2	0	9	1	7	5	5	4	5.25
2011-11-17	Nov	summer 11 - 12	P57	Private	heavy	Aug mid	absent	1	2b	0	5	2	2	0	9	1	5	3	2	5	3.75
2011-11-17	Nov	summer 11 - 12	P57	Private	heavy	Aug mid	absent	1	3a	2	4	1	2	0	9	1	6	4	3	0	3.25
2011-11-17	Nov	summer 11 - 12	P57	Private	heavy	Aug mid	absent	1	3b	3	3	0	3	0	9	1	0	5	0	0	1.25
2011-11-17	Nov	summer 11 - 12	P57	Private	heavy	Aug mid	absent	1	4a	4	2	2	1	0	9	1	9	0	0	0	2.25
2011-11-17	Nov	summer 11 - 12	P57	Private	heavy	Aug mid	absent	1	4b	1	3	0	5	0	9	1	5	0	4	0	2.25
2011-11-17	Nov	summer 11 - 12	P57	Private	heavy	Aug mid	absent	1	5a	6	2	1	0	0	9	1	3	5	0	0	2
2011-11-17	Nov	summer 11 - 12	P57	Private	heavy	Aug mid	absent	1	5b	4	2	2	1	0	9	1	2	4	7	0	3.25
2011-11-17	Nov	summer 11 - 12	P57	Private	heavy	Aug mid	absent	1	6a	1	7	0	1	0	9	1	10	6	4	4	6
2011-11-17	Nov	summer 11 - 12	P57	Private	heavy	Aug mid	absent	1	6b	1	6	0	2	0	9	1	5	8	6	4	5.75
2011-11-17	Nov	summer 11 - 12	P57	Private	heavy	Aug mid	absent	1	7a	1	4	1	3	0	9	1	21	4	3	0	7
2011-11-17	Nov	summer 11 - 12	P57	Private	heavy	Aug mid	absent	1	7b	3	2	0	4	0	9	1	8	5	3	0	4
2011-11-17	Nov	summer 11 - 12	P57	Private	heavy	Aug mid	absent	1	8a	2	4	0	3	0	9	1	0	0	7	9	4
2011-11-17	Nov	summer 11 - 12	P57	Private	heavy	Aug mid	absent	1	8b	3	1	0	5	0	9	1	8	0	0	0	2
2011-11-17	Nov	summer 11 - 12	P57	Private	heavy	Aug mid	absent	1	9a	1	6	0	2	0	9	1	5	5	0	0	2.5
2011-11-17	Nov	summer 11 - 12	P57	Private	heavy	Aug mid	absent	1	9b	1	8	0	0	0	9	1	6	6	0	5	4.25
2011-11-17	Nov	summer 11 - 12	P57	Private	heavy	Aug mid	absent	1	10a	3	2	1	3	0	9	1	5	6	0	0	2.75
2011-11-17	Nov	summer 11 - 12	P57	Private	heavy	Aug mid	absent	1	10b	2	3	0	4	0	9	1	5	5	0	0	2.5
2011-11-18	Nov	summer 11 - 12	P03	Eskom	none	Oct late	present	7	1a	8	1	0	0	0	9	1	8	0	0	0	2
2011-11-18	Nov	summer 11 - 12	P03	Eskom	none	Oct late	present	7	1b	3	4	1	1	0	9	1	5	0	0	4	2.25
2011-11-18	Nov	summer 11 - 12	P03	Eskom	none	Oct late	present	7	2a	1	1	0	7	0	9	1	0	2	5	0	1.75
2011-11-18	Nov	summer 11 - 12	P03	Eskom	none	Oct late	present	7	2b	0	5	0	4	0	9	1	12	8	0	4	6
2011-11-18	Nov	summer 11 - 12	P03	Eskom	none	Oct late	present	7	3a	1	7	0	1	0	9	1	5	13	7	4	7.25
2011-11-18	Nov	summer 11 - 12	P03	Eskom	none	Oct late	present	7	3b	3	3	2	1	0	9	1	15	14	9	0	9.5
2011-11-18	Nov	summer 11 - 12	P03	Eskom	none	Oct late	present	7	4a	0	7	0	2	0	9	1	17	12	13	8	12.5
2011-11-18	Nov	summer 11 - 12	P03	Eskom	none	Oct late	present	7	4b	2	3	0	4	0	9	1	12	14	2	0	7
2011-11-18	Nov	summer 11 - 12	P03	Eskom	none	Oct late	present	7	5a	3	3	0	3	0	9	1	0	0	6	4	2.5
2011-11-18	Nov	summer 11 - 12	P03	Eskom	none	Oct late	present	7	5b	4	2	0	3	0	9	1	0	0	0	3	0.75
2011-11-18	Nov	summer 11 - 12	P03	Eskom	none	Oct late	present	7	6a	3	4	0	2	0	9	1	10	13	0	11	8.5
2011-11-18	Nov	summer 11 - 12	P03	Eskom	none	Oct late	present	7	6b	4	4	0	1	0	9	1	15	0	0	0	3.75
2011-11-18	Nov	summer 11 - 12	P03	Eskom	none	Oct late	present	7	7a	4	3	0	2	0	9	1	3	3	0	0	1.5
2011-11-18	Nov	summer 11 - 12	P03	Eskom	none	Oct late	present	7	7b	2	2	2	3	0	9	1	8	6	8	0	5.5
2011-11-18	Nov	summer 11 - 12	P03	Eskom	none	Oct late	present	7	8a	3	2	0	4	0	9	1	0	0	0	0	0
2011-11-18	Nov	summer 11 - 12	P03	Eskom	none	Oct late	present	7	8b	6	2	0	1	0	9	1	5	0	0	0	1.25
2011-11-18	Nov	summer 11 - 12	P03	Eskom	none	Oct late	present	7	9a	5	1	1	2	0	9	1	6	0	0	0	1.5
2011-11-18	Nov	summer 11 - 12	P03	Eskom	none	Oct late	present	7	9b	2	7	0	0	0	9	1	10	6	3	0	4.75
2011-11-18	Nov	summer 11 - 12	P03	Eskom	none	Oct late	present	7	10a	2	5	0	2	0	9	1	6	5	0	0	2.75
2011-11-18	Nov	summer 11 - 12	P03	Eskom	none	Oct late	present	7	10b	5	2	1	1	0	9	1	0	0	0	0	0
2011-11-18	Nov	summer 11 - 12	P03A	Private	heavy	Sept early	absent	4	1a	0	4	1	4	0	9	1	4	3	3	0	2.5
2011-11-18	Nov	summer 11 - 12	P03A	Private	heavy	Sept early	absent	4	1b	5	4	0	0	0	9	1	3	3	2	0	2
2011-11-18	Nov	summer 11 - 12	P03A	Private	heavy	Sept early	absent	4	2a	2	3	1	3	0	9	1	6	5	4	5	5
2011-11-18	Nov	summer 11 - 12	P03A	Private	heavy	Sept early	absent	4	2b	3	6	0	0	0	9	1	4	3	6	2	3.75
2011-11-18	Nov	summer 11 - 12	P03A	Private	heavy	Sept early	absent	4	3a	6	3	0	0	0	9	1	0	0	4	6	2.5
2011-11-18	Nov	summer 11 - 12	P03A	Private	heavy	Sept early	absent	4	3b	2	4	0	3	0	9	1	2	0	0	8	2.5
2011-11-18	Nov	summer 11 - 12	P03A	Private	heavy	Sept early	absent	4	4a	2	3	3	0	1	9	1	0	9	5	0	3.5
2011-11-18	Nov	summer 11 - 12	P03A	Private	heavy	Sept early	absent	4	4b	4	2	0	3	0	9	1	6	5	0	0	2.75
2011-11-18	Nov	summer 11 - 12	P03A	Private	heavy	Sept early	absent	4	5a	1	2	0	6	0	9	1	4	5	0	0	2.25
2011-11-18	Nov	summer 11 - 12	P03A	Private	heavy	Sept early	absent	4	5b	1	3	1	4	0	9	1	5	7	8	0	5
2011-11-18	Nov	summer 11 - 12	P03A	Private	heavy	Sept early	absent	4	6a	0	0	0	2	7	9	1	0	0	0	7	1.75
2011-11-18	Nov	summer 11 - 12	P03A	Private	heavy	Sept early	absent	4	6b	5	0	0	4	0	9	1	0	0	0	0	0
2011-11-18	Nov	summer 11 - 12	P03A	Private	heavy	Sept early	absent	4	7a	2	2	2	3	0	9	1	8	14	0	0	5.5
2011-11-18	Nov	summer 11 - 12	P03A	Private	heavy	Sept early	absent	4	7b	1	7	1	0	0	9	1	6	0	10	4	5
2011-11-18	Nov	summer 11 - 12	P03A	Private	heavy	Sept early	absent	4	8a	3	2	1	3	0	9	1	3	6	0	0	2.25
2011-11-18	Nov	summer 11 - 12	P03A	Private	heavy	Sept early	absent	4	8b	0	1	1	7	0	9	1	0	0	2	0	0.5
2011-11-18	Nov	summer 11 - 12	P03A	Private	heavy	Sept early	absent	4	9a	0	8	1	0	0	9	1	3	8	3	4	4.5
2011-11-18	Nov	summer 11 - 12	P03A	Private	heavy	Sept early	absent	4	9b	2	6	0	1	0	9	1	6	4	6	5	5.25
2011-11-18	Nov	summer 11 - 12	P03A	Private	heavy	Sept early	absent	4	10a	5	4	0	0	0	9	1	4	5	3	0	3
2011-11-18	Nov	summer 11 - 12	P03A	Private	heavy	Sept early	absent	4	10b	0	2	0	7	0	9	1	15	0	7	0	5.5
2011-11-18	Nov	summer 11 - 12	P54	Private	heavy	July late	absent	9	1a	1	6	2	0	0	9	1	4	2	5	7	4.5
2011-11-18	Nov	summer 11 - 12	P54	Private	heavy	July late	absent	9	1b	0	7	1	1	0	9	1	6	4	10	0	5
2011-11-18	Nov	summer 11 - 12	P54	Private	heavy	July late	absent	9	2a	0	4	1	4	0	9	1	0	0	0	8	2
2011-11-18	Nov	summer 11 - 12	P54	Private	heavy	July late	absent	9	2b	3	3	0	3	0	9	1	8	4	0	0	3
2011-11-18	Nov	summer 11 - 12	P54	Private	heavy	July late	absent	9	3a	5	4	0	0	0	9	1	7	3	2	0	3
2011-11-18	Nov	summer 11 - 12	P54	Private	heavy	July late	absent	9	3b	2	5	2	0	0	9	1	9	5	0	0	3.5
2011-11-18	Nov	summer 11 - 12	P54	Private	heavy	July late	absent	9	4a	1	6	0	2	0	9	1	4	4	2	7	4.25
2011-11-18	Nov	summer 11 - 12	P54	Private	heavy	July late	absent	9	4b	0	6	0	3	0	9	1	11	7	6	6	7.5
2011-11-18	Nov	summer 11 - 12	P54	Private	heavy	July late	absent	9	5a	0	5	0	4	0	9	1	0	0	8	7	3.75
2011-11-18	Nov	summer 11 - 12	P54	Private	heavy	July late	absent	9	5b	2	4	0	3	0	9	1	4	6	7	4	5.25
2011-11-18	Nov	summer 11 - 12	P54	Private	heavy	July late	absent	9	6a	4	3	0	2	0	9	1	11	4	8	5	7
2011-11-18	Nov	summer 11 - 12	P54	Private	heavy	July late	absent	9	6b	2	0	4	3	0	9	1	0	10	6	0	4
2011-11-18	Nov	summer 11 - 12	P54	Private	heavy	July late	absent	9	7a	0	7	1	1	0	9	1	11	10	8	0	7.25
2011-11-18	Nov	summer 11 - 12	P54	Private	heavy	July late	absent	9	7b	0	6	2	1	0	9	1	12	9	5	0	6.5
2011-11-18	Nov	summer 11 - 12	P54	Private	heavy	July late	absent	9	8a	1	5	0	3	0	9	1	0	3	5	2	2.5
2011-11-18	Nov	summer 11 - 12	P54	Private	heavy	July late	absent	9	8b	2	4	1	2	0	9	1	9	11	0	8	7
2011-11-18	Nov	summer 11 - 12	P54	Private	heavy	July late	absent	9	9a	0	7	2	0	0	9	1	18	10	12	22	15.5
2011-11-18	Nov	summer 11 - 12	P54	Private	heavy	July late	absent	9	9b	0	6	1	2	0	9	1	0	13	14	18	11.25
2011-11-18	Nov	summer 11 - 12	P54	Private	heavy	July late	absent	9	10a	2	3	3	1	0	9	1	0	0	16	15	7.75
2011-11-18	Nov	summer 11 - 12	P54	Private	heavy	July late	absent	9	10b	3	3	1	2	0	9	1	9	17	14	0	10
2011-11-21	Nov	summer 11 - 12	P07	Eskom	light	Oct early	present	7	1a	6	2	0	1	0	9	1	10	0	0	0	2.5
2011-11-21	Nov	summer 11 - 12	P07	Eskom	light	Oct early	present	7	1b	4	4	0	1	0	9	1	7	0	0	0	1.75
2011-11-21	Nov	summer 11 - 12	P07	Eskom	light	Oct early	present	7	2a	5	2	0	2	0	9	1	18	5	0	0	5.75
2011-11-21	Nov	summer 11 - 12	P07	Eskom	light	Oct early	present	7	2b	5	2	2	0	0	9	1	9	16	0	0	6.25
2011-11-21	Nov	summer 11 - 12	P07	Eskom	light	Oct early	present	7	3a	3	3	0	3	0	9	1	5	8	0	0	3.25
2011-11-21	Nov	summer 11 - 12	P07	Eskom	light	Oct early	present	7	3b	4	5	0	0	0	9	1	15	0	0	5	5
2011-11-21	Nov	summer 11 - 12	P07	Eskom	light	Oct early	present	7	4a	6	3	0	0	0	9	1	0	0	0	0	0
2011-11-21	Nov	summer 11 - 12	P07	Eskom	light	Oct early	present	7	4b	3	6	0	0	0	9	1	11	8	6	0	6.25
2011-11-21	Nov	summer 11 - 12	P07	Eskom	light	Oct early	present	7	5a	4	5	0	0	0	9	1	10	10	0	0	5
2011-11-21	Nov	summer 11 - 12	P07	Eskom	light	Oct early	present	7	5b	6	1	0	2	0	9	1	6	0	0	0	1.5
2011-11-21	Nov	summer 11 - 12	P07	Eskom	light	Oct early	present	7	6a	5	2	0	2	0	9	1	9	0	0	0	2.25
2011-11-21	Nov	summer 11 - 12	P07	Eskom	light	Oct early	present	7	6b	1	4	2	2	0	9	1	14	6	0	0	5
2011-11-21	Nov	summer 11 - 12	P07	Eskom	light	Oct early	present	7	7a	4	1	2	2	0	9	1	5	3	0	0	2
2011-11-21	Nov	summer 11 - 12	P07	Eskom	light	Oct early	present	7	7b	3	5	1	0	0	9	1	15	0	0	0	3.75
2011-11-21	Nov	summer 11 - 12	P07	Eskom	light	Oct early	present	7	8a	2	4	0	3	0	9	1	16	6	0	0	5.5
2011-11-21	Nov	summer 11 - 12	P07	Eskom	light	Oct early	present	7	8b	0	5	3	1	0	9	1	11	6	0	0	4.25
2011-11-21	Nov	summer 11 - 12	P07	Eskom	light	Oct early	present	7	9a	2	4	0	3	0	9	1	4	6	0	0	2.5
2011-11-21	Nov	summer 11 - 12	P07	Eskom	light	Oct early	present	7	9b	5	3	1	0	0	9	1	7	0	0	0	1.75
2011-11-21	Nov	summer 11 - 12	P07	Eskom	light	Oct early	present	7	10a	4	4	0	1	0	9	1	11	16	6	0	8.25
2011-11-21	Nov	summer 11 - 12	P07	Eskom	light	Oct early	present	7	10b	3	4	1	1	0	9	1	11	6	4	0	5.25
2011-11-22	Nov	summer 11 - 12	P22	Eskom	none	Oct mid	present	8	1a	2	3	0	4	0	9	1	3	2	5	0	2.5
2011-11-22	Nov	summer 11 - 12	P22	Eskom	none	Oct mid	present	8	1b	3	5	0	1	0	9	1	8	5	4	4	5.25
2011-11-22	Nov	summer 11 - 12	P22	Eskom	none	Oct mid	present	8	2a	3	3	0	3	0	9	1	0	0	5	0	1.25
2011-11-22	Nov	summer 11 - 12	P22	Eskom	none	Oct mid	present	8	2b	1	2	2	4	0	9	1	0	0	8	4	3
2011-11-22	Nov	summer 11 - 12	P22	Eskom	none	Oct mid	present	8	3a	1	5	1	2	0	9	1	8	10	7	5	7.5
2011-11-22	Nov	summer 11 - 12	P22	Eskom	none	Oct mid	present	8	3b	3	2	0	4	0	9	1	3	9	11	0	5.75
2011-11-22	Nov	summer 11 - 12	P22	Eskom	none	Oct mid	present	8	4a	2	4	1	2	0	9	1	0	2	6	9	4.25
2011-11-22	Nov	summer 11 - 12	P22	Eskom	none	Oct mid	present	8	4b	1	3	0	5	0	9	1	8	5	5	3	5.25
2011-11-22	Nov	summer 11 - 12	P22	Eskom	none	Oct mid	present	8	5a	0	2	4	3	0	9	1	3	3	0	0	1.5
2011-11-22	Nov	summer 11 - 12	P22	Eskom	none	Oct mid	present	8	5b	0	7	0	2	0	9	1	11	9	5	4	7.25
2011-11-22	Nov	summer 11 - 12	P22	Eskom	none	Oct mid	present	8	6a	4	4	0	1	0	9	1	10	4	0	0	3.5
2011-11-22	Nov	summer 11 - 12	P22	Eskom	none	Oct mid	present	8	6b	3	6	0	0	0	9	1	7	5	5	0	4.25
2011-11-22	Nov	summer 11 - 12	P22	Eskom	none	Oct mid	present	8	7a	5	1	1	2	0	9	1	9	0	0	0	2.25
2011-11-22	Nov	summer 11 - 12	P22	Eskom	none	Oct mid	present	8	7b	6	1	0	2	0	9	1	0	0	0	0	0
2011-11-22	Nov	summer 11 - 12	P22	Eskom	none	Oct mid	present	8	8a	2	3	3	1	0	9	1	6	4	0	0	2.5
2011-11-22	Nov	summer 11 - 12	P22	Eskom	none	Oct mid	present	8	8b	3	4	0	2	0	9	1	9	7	0	0	4
2011-11-22	Nov	summer 11 - 12	P22	Eskom	none	Oct mid	present	8	9a	6	1	0	2	0	9	1	7	0	0	0	1.75
2011-11-22	Nov	summer 11 - 12	P22	Eskom	none	Oct mid	present	8	9b	3	5	1	0	0	9	1	4	9	3	0	4
2011-11-22	Nov	summer 11 - 12	P22	Eskom	none	Oct mid	present	8	10a	3	4	0	2	0	9	1	8	4	0	0	3
2011-11-22	Nov	summer 11 - 12	P22	Eskom	none	Oct mid	present	8	10b	2	7	0	0	0	9	1	5	8	11	0	6
2011-11-23	Nov	summer 11 - 12	P42	Eskom	none	Oct late	absent	6	1a	0	0	0	9	0	9	1	6	5	10	5	6.5
2011-11-23	Nov	summer 11 - 12	P42	Eskom	none	Oct late	absent	6	1b	2	2	2	2	1	9	1	15	9	0	2	6.5
2011-11-23	Nov	summer 11 - 12	P42	Eskom	none	Oct late	absent	6	2a	3	3	0	3	0	9	1	0	0	14	11	6.25
2011-11-23	Nov	summer 11 - 12	P42	Eskom	none	Oct late	absent	6	2b	2	2	0	5	0	9	1	4	13	0	0	4.25
2011-11-23	Nov	summer 11 - 12	P42	Eskom	none	Oct late	absent	6	3a	1	3	0	5	0	9	1	17	15	4	13	12.25
2011-11-23	Nov	summer 11 - 12	P42	Eskom	none	Oct late	absent	6	3b	1	3	1	4	0	9	1	9	3	13	5	7.5
2011-11-23	Nov	summer 11 - 12	P42	Eskom	none	Oct late	absent	6	4a	0	6	0	3	0	9	1	12	3	6	11	8
2011-11-23	Nov	summer 11 - 12	P42	Eskom	none	Oct late	absent	6	4b	2	5	2	0	0	9	1	7	6	0	12	6.25
2011-11-23	Nov	summer 11 - 12	P42	Eskom	none	Oct late	absent	6	5a	3	2	0	4	0	9	1	3	5	0	0	2
2011-11-23	Nov	summer 11 - 12	P42	Eskom	none	Oct late	absent	6	5b	3	3	0	3	0	9	1	4	0	8	0	3
2011-11-23	Nov	summer 11 - 12	P42	Eskom	none	Oct late	absent	6	6a	1	6	1	1	0	9	1	9	7	4	4	6
2011-11-23	Nov	summer 11 - 12	P42	Eskom	none	Oct late	absent	6	6b	2	4	0	3	0	9	1	11	0	8	6	6.25
2011-11-23	Nov	summer 11 - 12	P42	Eskom	none	Oct late	absent	6	7a	2	3	0	4	0	9	1	9	5	0	5	4.75
2011-11-23	Nov	summer 11 - 12	P42	Eskom	none	Oct late	absent	6	7b	4	1	0	4	0	9	1	13	0	4	18	8.75
2011-11-23	Nov	summer 11 - 12	P42	Eskom	none	Oct late	absent	6	8a	0	7	0	2	0	9	1	9	11	10	8	9.5
2011-11-23	Nov	summer 11 - 12	P42	Eskom	none	Oct late	absent	6	8b	0	6	0	3	0	9	1	11	12	4	11	9.5
2011-11-23	Nov	summer 11 - 12	P42	Eskom	none	Oct late	absent	6	9a	1	5	1	2	0	9	1	9	5	12	0	6.5
2011-11-23	Nov	summer 11 - 12	P42	Eskom	none	Oct late	absent	6	9b	3	2	0	4	0	9	1	6	2	6	4	4.5
2011-11-23	Nov	summer 11 - 12	P42	Eskom	none	Oct late	absent	6	10a	6	0	0	3	0	9	1	0	0	0	0	0
2011-11-23	Nov	summer 11 - 12	P42	Eskom	none	Oct late	absent	6	10b	3	1	1	4	0	9	1	8	0	0	0	2
2011-11-23	Nov	summer 11 - 12	P63	Private	heavy	Oct late	absent	5	1a	4	3	0	2	0	9	1	12	6	0	0	4.5
2011-11-23	Nov	summer 11 - 12	P63	Private	heavy	Oct late	absent	6	1b	0	7	0	2	0	9	1	6	0	5	7	4.5
2011-11-23	Nov	summer 11 - 12	P63	Private	heavy	Oct late	absent	6	2a	2	4	0	3	0	9	1	3	2	4	5	3.5
2011-11-23	Nov	summer 11 - 12	P63	Private	heavy	Oct late	absent	6	2b	0	5	4	0	0	9	1	16	3	13	16	12
2011-11-23	Nov	summer 11 - 12	P63	Private	heavy	Oct late	absent	6	3a	5	2	0	2	0	9	1	4	0	0	4	2
2011-11-23	Nov	summer 11 - 12	P63	Private	heavy	Oct late	absent	6	3b	2	5	1	1	0	9	1	10	3	4	0	4.25
2011-11-23	Nov	summer 11 - 12	P63	Private	heavy	Oct late	absent	6	4a	2	2	0	5	0	9	1	5	0	0	4	2.25
2011-11-23	Nov	summer 11 - 12	P63	Private	heavy	Oct late	absent	6	4b	3	2	4	0	0	9	1	6	3	5	0	3.5
2011-11-23	Nov	summer 11 - 12	P63	Private	heavy	Oct late	absent	6	5a	4	1	0	4	0	9	1	0	0	0	3	0.75
2011-11-23	Nov	summer 11 - 12	P63	Private	heavy	Oct late	absent	6	5b	2	5	2	0	0	9	1	10	6	5	19	10
2011-11-23	Nov	summer 11 - 12	P63	Private	heavy	Oct late	absent	6	6a	5	2	0	2	0	9	1	4	12	0	6	5.5
2011-11-23	Nov	summer 11 - 12	P63	Private	heavy	Oct late	absent	6	6b	1	8	0	0	0	9	1	6	5	3	9	5.75
2011-11-23	Nov	summer 11 - 12	P63	Private	heavy	Oct late	absent	6	7a	2	4	0	3	0	9	1	0	0	6	2	2
2011-11-23	Nov	summer 11 - 12	P63	Private	heavy	Oct late	absent	6	7b	0	7	0	2	0	9	1	9	14	0	3	6.5
2011-11-23	Nov	summer 11 - 12	P63	Private	heavy	Oct late	absent	6	8a	3	6	0	0	0	9	1	7	3	0	13	5.75
2011-11-23	Nov	summer 11 - 12	P63	Private	heavy	Oct late	absent	6	8b	1	6	0	2	0	9	1	4	7	7	12	7.5
2011-11-23	Nov	summer 11 - 12	P63	Private	heavy	Oct late	absent	6	9a	1	5	0	3	0	9	1	3	2	5	7	4.25
2011-11-23	Nov	summer 11 - 12	P63	Private	heavy	Oct late	absent	6	9b	0	4	0	5	0	9	1	8	5	4	3	5
2011-11-23	Nov	summer 11 - 12	P63	Private	heavy	Oct late	absent	6	10a	2	6	0	1	0	9	1	6	5	8	0	4.75
2011-11-23	Nov	summer 11 - 12	P63	Private	heavy	Oct late	absent	6	10b	1	3	2	3	0	9	1	9	6	0	0	3.75
2011-11-29	Nov	summer 11 - 12	P64	Private	light	Oct late	absent	8	1a	3	6	0	0	0	9	1	12	6	0	0	4.5
2011-11-29	Nov	summer 11 - 12	P64	Private	light	Oct late	absent	8	1b	2	4	2	1	0	9	1	8	12	22	5	11.75
2011-11-29	Nov	summer 11 - 12	P64	Private	light	Oct late	absent	8	2a	0	7	0	2	0	9	1	5	6	14	12	9.25
2011-11-29	Nov	summer 11 - 12	P64	Private	light	Oct late	absent	8	2b	1	2	4	2	0	9	1	0	8	22	7	9.25
2011-11-29	Nov	summer 11 - 12	P64	Private	light	Oct late	absent	8	3a	2	6	0	1	0	9	1	14	20	10	8	13
2011-11-29	Nov	summer 11 - 12	P64	Private	light	Oct late	absent	8	3b	0	6	0	3	0	9	1	12	18	8	10	12
2011-11-29	Nov	summer 11 - 12	P64	Private	light	Oct late	absent	8	4a	3	3	0	3	0	9	1	6	5	10	0	5.25
2011-11-29	Nov	summer 11 - 12	P64	Private	light	Oct late	absent	8	4b	0	2	0	7	0	9	1	4	0	6	0	2.5
2011-11-29	Nov	summer 11 - 12	P64	Private	light	Oct late	absent	8	5a	2	4	1	2	0	9	1	10	1	6	5	5.5
2011-11-29	Nov	summer 11 - 12	P64	Private	light	Oct late	absent	8	5b	1	5	0	3	0	9	1	14	16	5	0	8.75
2011-11-29	Nov	summer 11 - 12	P64	Private	light	Oct late	absent	8	6a	0	5	0	4	0	9	1	5	5	5	0	3.75
2011-11-29	Nov	summer 11 - 12	P64	Private	light	Oct late	absent	8	6b	2	4	0	3	0	9	1	6	0	0	0	1.5
2011-11-29	Nov	summer 11 - 12	P64	Private	light	Oct late	absent	8	7a	1	6	0	2	0	9	1	14	6	10	10	10
2011-11-29	Nov	summer 11 - 12	P64	Private	light	Oct late	absent	8	7b	0	5	0	4	0	9	1	7	7	0	0	3.5
2011-11-29	Nov	summer 11 - 12	P64	Private	light	Oct late	absent	8	8a	4	4	0	1	0	9	1	8	12	0	8	7
2011-11-29	Nov	summer 11 - 12	P64	Private	light	Oct late	absent	8	8b	0	4	3	2	0	9	1	18	4	4	0	6.5
2011-11-29	Nov	summer 11 - 12	P64	Private	light	Oct late	absent	8	9a	4	1	4	0	0	9	1	17	0	0	0	4.25
2011-11-29	Nov	summer 11 - 12	P64	Private	light	Oct late	absent	8	9b	5	1	0	3	0	9	1	6	8	0	0	3.5
2011-11-29	Nov	summer 11 - 12	P64	Private	light	Oct late	absent	8	10a	7	2	0	0	0	9	1	13	0	0	0	3.25
2011-11-29	Nov	summer 11 - 12	P64	Private	light	Oct late	absent	8	10b	0	5	2	2	0	9	1	0	0	0	0	0
2011-11-29	Nov	summer 11 - 12	P65	Eskom	none	Oct late	absent	3	1a	2	4	0	3	0	9	1	4	6	4	0	3.5
2011-11-29	Nov	summer 11 - 12	P65	Eskom	none	Oct late	absent	3	1b	3	4	2	0	0	9	1	4	5	7	4	5
2011-11-29	Nov	summer 11 - 12	P65	Eskom	none	Oct late	absent	3	2a	2	6	0	1	0	9	1	5	4	5	10	6
2011-11-29	Nov	summer 11 - 12	P65	Eskom	none	Oct late	absent	3	2b	4	5	0	0	0	9	1	3	2	0	5	2.5
2011-11-29	Nov	summer 11 - 12	P65	Eskom	none	Oct late	absent	3	3a	0	9	0	0	0	9	1	6	0	0	0	1.5
2011-11-29	Nov	summer 11 - 12	P65	Eskom	none	Oct late	absent	3	3b	2	3	1	3	0	9	1	2	0	5	0	1.75
2011-11-29	Nov	summer 11 - 12	P65	Eskom	none	Oct late	absent	3	4a	2	4	2	1	0	9	1	7	4	8	0	4.75
2011-11-29	Nov	summer 11 - 12	P65	Eskom	none	Oct late	absent	3	4b	5	2	0	2	0	9	1	0	0	0	8	2
2011-11-29	Nov	summer 11 - 12	P65	Eskom	none	Oct late	absent	3	5a	1	5	0	3	0	9	1	5	0	7	7	4.75
2011-11-29	Nov	summer 11 - 12	P65	Eskom	none	Oct late	absent	3	5b	1	4	0	3	1	9	1	4	4	6	5	4.75
2011-11-29	Nov	summer 11 - 12	P65	Eskom	none	Oct late	absent	3	6a	2	6	0	1	0	9	1	5	9	14	0	7
2011-11-29	Nov	summer 11 - 12	P65	Eskom	none	Oct late	absent	3	6b	3	2	0	4	0	9	1	13	9	0	0	5.5
2011-11-29	Nov	summer 11 - 12	P65	Eskom	none	Oct late	absent	3	7a	4	3	0	2	0	9	1	6	0	0	0	1.5
2011-11-29	Nov	summer 11 - 12	P65	Eskom	none	Oct late	absent	3	7b	0	1	0	8	0	9	1	7	0	0	0	1.75
2011-11-29	Nov	summer 11 - 12	P65	Eskom	none	Oct late	absent	3	8a	0	1	1	7	0	9	1	0	0	12	0	3
2011-11-29	Nov	summer 11 - 12	P65	Eskom	none	Oct late	absent	3	8b	2	7	0	0	0	9	1	16	7	7	4	8.5
2011-11-29	Nov	summer 11 - 12	P65	Eskom	none	Oct late	absent	3	9a	0	5	0	4	0	9	1	7	12	0	0	4.75
2011-11-29	Nov	summer 11 - 12	P65	Eskom	none	Oct late	absent	3	9b	0	6	2	1	0	9	1	17	14	2	8	10.25
2011-11-29	Nov	summer 11 - 12	P65	Eskom	none	Oct late	absent	3	10a	1	6	1	1	0	9	1	13	6	12	0	7.75
2011-11-29	Nov	summer 11 - 12	P65	Eskom	none	Oct late	absent	3	10b	0	5	0	4	0	9	1	14	0	8	10	8
2011-12-12	Dec	summer 11 - 12	P01	Eskom	light	Oct mid	present	6	1b	2	4	0	3	0	9	1	15	18	10	0	10.75
2011-12-12	Dec	summer 11 - 12	P01	Eskom	light	Oct mid	present	6	2a	1	7	0	1	0	9	1	12	13	8	15	12
2011-12-12	Dec	summer 11 - 12	P01	Eskom	light	Oct mid	present	6	2b	3	6	0	0	0	9	1	13	15	11	14	13.25
2011-12-12	Dec	summer 11 - 12	P01	Eskom	light	Oct mid	present	6	3a	4	4	0	1	0	9	1	10	7	0	0	4.25
2011-12-12	Dec	summer 11 - 12	P01	Eskom	light	Oct mid	present	6	3b	4	5	0	0	0	9	1	8	8	6	6	7
2011-12-12	Dec	summer 11 - 12	P01	Eskom	light	Oct mid	present	6	4a	5	4	0	0	0	9	1	4	7	6	0	4.25
2011-12-12	Dec	summer 11 - 12	P01	Eskom	light	Oct mid	present	6	4b	4	4	0	1	0	9	1	9	7	8	10	8.5
2011-12-12	Dec	summer 11 - 12	P01	Eskom	light	Oct mid	present	6	5a	4	5	0	0	0	9	1	7	4	0	0	2.75
2011-12-12	Dec	summer 11 - 12	P01	Eskom	light	Oct mid	present	6	5b	3	6	0	0	0	9	1	10	0	10	6	6.5
2011-12-12	Dec	summer 11 - 12	P01	Eskom	light	Oct mid	present	6	6a	5	4	0	0	0	9	1	8	6	0	0	3.5
2011-12-12	Dec	summer 11 - 12	P01	Eskom	light	Oct mid	present	6	6b	4	4	0	1	0	9	1	8	0	0	0	2
2011-12-12	Dec	summer 11 - 12	P01	Eskom	light	Oct mid	present	6	7a	3	3	0	3	0	9	1	10	8	0	0	4.5
2011-12-12	Dec	summer 11 - 12	P01	Eskom	light	Oct mid	present	6	7b	5	2	2	0	0	9	1	8	9	0	0	4.25
2011-12-12	Dec	summer 11 - 12	P01	Eskom	light	Oct mid	present	6	8a	3	6	0	0	0	9	1	8	8	6	9	7.75
2011-12-12	Dec	summer 11 - 12	P01	Eskom	light	Oct mid	present	6	8b	1	8	0	0	0	9	1	10	15	0	0	6.25
2011-12-12	Dec	summer 11 - 12	P01	Eskom	light	Oct mid	present	6	9a	1	6	0	2	0	9	1	16	4	6	4	7.5
2011-12-12	Dec	summer 11 - 12	P01	Eskom	light	Oct mid	present	6	9b	2	6	0	1	0	9	1	8	8	0	0	4
2011-12-12	Dec	summer 11 - 12	P01	Eskom	light	Oct mid	present	6	10a	4	4	1	0	0	9	1	11	26	8	8	13.25
2011-12-12	Dec	summer 11 - 12	P01	Eskom	light	Oct mid	present	6	10b	5	3	1	0	0	9	1	9	7	8	0	6
2011-12-12	Dec	summer 11 - 12	P03	Eskom	light	Oct late	present	6	1a	5	3	1	0	0	9	1	5	0	0	0	1.25
2011-12-12	Dec	summer 11 - 12	P03	Eskom	light	Oct late	present	6	1b	4	5	0	0	0	9	1	12	5	0	0	4.25
2011-12-12	Dec	summer 11 - 12	P03	Eskom	light	Oct late	present	6	2a	5	3	1	0	0	9	1	12	9	8	0	7.25
2011-12-12	Dec	summer 11 - 12	P03	Eskom	light	Oct late	present	6	2b	3	5	0	1	0	9	1	12	0	4	0	4
2011-12-12	Dec	summer 11 - 12	P03	Eskom	light	Oct late	present	6	3a	3	6	0	0	0	9	1	8	5	0	8	5.25
2011-12-12	Dec	summer 11 - 12	P03	Eskom	light	Oct late	present	6	3b	2	7	0	0	0	9	1	8	15	5	0	7
2011-12-12	Dec	summer 11 - 12	P03	Eskom	light	Oct late	present	6	4a	3	6	0	0	0	9	1	13	11	0	5	7.25
2011-12-12	Dec	summer 11 - 12	P03	Eskom	light	Oct late	present	6	4b	5	3	1	0	0	9	1	7	12	13	10	10.5
2011-12-12	Dec	summer 11 - 12	P03	Eskom	light	Oct late	present	6	5a	4	5	0	0	0	9	1	6	4	10	0	5
2011-12-12	Dec	summer 11 - 12	P03	Eskom	light	Oct late	present	6	5b	2	7	0	0	0	9	1	10	8	0	0	4.5
2011-12-12	Dec	summer 11 - 12	P03	Eskom	light	Oct late	present	6	6a	3	5	0	1	0	9	1	4	17	8	6	8.75
2011-12-12	Dec	summer 11 - 12	P03	Eskom	light	Oct late	present	6	6b	2	7	0	0	0	9	1	11	12	10	0	8.25
2011-12-12	Dec	summer 11 - 12	P03	Eskom	light	Oct late	present	6	7a	3	5	0	1	0	9	1	5	0	6	8	4.75
2011-12-12	Dec	summer 11 - 12	P03	Eskom	light	Oct late	present	6	7b	0	9	0	0	0	9	1	19	10	7	11	11.75
2011-12-12	Dec	summer 11 - 12	P03	Eskom	light	Oct late	present	6	8a	3	4	1	1	0	9	1	5	12	0	6	5.75
2011-12-12	Dec	summer 11 - 12	P03	Eskom	light	Oct late	present	6	8b	1	8	0	0	0	9	1	6	7	14	6	8.25
2011-12-12	Dec	summer 11 - 12	P03	Eskom	light	Oct late	present	6	9a	5	4	0	0	0	9	1	8	5	0	7	5
2011-12-12	Dec	summer 11 - 12	P03	Eskom	light	Oct late	present	6	9b	5	4	0	0	0	9	1	5	4	0	0	2.25
2011-12-12	Dec	summer 11 - 12	P03	Eskom	light	Oct late	present	6	10a	5	1	1	2	0	9	1	4	4	0	0	2
2011-12-12	Dec	summer 11 - 12	P03	Eskom	light	Oct late	present	6	10b	3	1	5	0	0	9	1	0	0	10	10	5
2011-12-12	Dec	summer 11 - 12	P03A	Private	heavy	Sept early	absent	6	1a	4	4	0	1	0	9	1	5	4	0	0	2.25
2011-12-12	Dec	summer 11 - 12	P03A	Private	heavy	Sept early	absent	6	1b	5	4	0	0	0	9	1	9	0	8	0	4.25
2011-12-12	Dec	summer 11 - 12	P03A	Private	heavy	Sept early	absent	6	2a	5	3	1	0	0	9	1	6	6	0	0	3
2011-12-12	Dec	summer 11 - 12	P03A	Private	heavy	Sept early	absent	6	2b	5	4	0	0	0	9	1	6	6	8	0	5
2011-12-12	Dec	summer 11 - 12	P03A	Private	heavy	Sept early	absent	6	3a	3	6	0	0	0	9	1	10	8	3	0	5.25
2011-12-12	Dec	summer 11 - 12	P03A	Private	heavy	Sept early	absent	6	3b	5	1	1	2	0	9	1	5	0	0	0	1.25
2011-12-12	Dec	summer 11 - 12	P03A	Private	heavy	Sept early	absent	6	4a	4	5	0	0	0	9	1	11	5	0	0	4
2011-12-12	Dec	summer 11 - 12	P03A	Private	heavy	Sept early	absent	6	4b	3	4	0	2	0	9	1	7	6	0	6	4.75
2011-12-12	Dec	summer 11 - 12	P03A	Private	heavy	Sept early	absent	6	5a	0	6	1	2	0	9	1	5	4	0	0	2.25
2011-12-12	Dec	summer 11 - 12	P03A	Private	heavy	Sept early	absent	6	5b	6	2	1	0	0	9	1	10	5	0	6	5.25
2011-12-12	Dec	summer 11 - 12	P03A	Private	heavy	Sept early	absent	6	6a	2	1	5	1	0	9	1	7	0	0	0	1.75
2011-12-12	Dec	summer 11 - 12	P03A	Private	heavy	Sept early	absent	6	6b	7	1	0	1	0	9	1	0	0	0	0	0
2011-12-12	Dec	summer 11 - 12	P03A	Private	heavy	Sept early	absent	6	7a	4	1	0	4	0	9	1	7	0	0	0	1.75
2011-12-12	Dec	summer 11 - 12	P03A	Private	heavy	Sept early	absent	6	7b	6	2	1	0	0	9	1	4	0	0	0	1
2011-12-12	Dec	summer 11 - 12	P03A	Private	heavy	Sept early	absent	6	8a	6	3	0	0	0	9	1	6	5	0	0	2.75
2011-12-12	Dec	summer 11 - 12	P03A	Private	heavy	Sept early	absent	6	8b	6	0	2	1	0	9	1	7	0	0	0	1.75
2011-12-12	Dec	summer 11 - 12	P03A	Private	heavy	Sept early	absent	6	9a	3	5	0	1	0	9	1	10	4	7	0	5.25
2011-12-12	Dec	summer 11 - 12	P03A	Private	heavy	Sept early	absent	6	9b	6	3	0	0	0	9	1	6	5	0	0	2.75
2011-12-12	Dec	summer 11 - 12	P03A	Private	heavy	Sept early	absent	6	10a	2	6	1	0	0	9	1	3	4	6	0	3.25
2011-12-12	Dec	summer 11 - 12	P03A	Private	heavy	Sept early	absent	6	10b	2	7	0	0	0	9	1	4	4	5	5	4.5
2011-12-12	Dec	summer 11 - 12	P10	Private	light	Sept early	present	7	1a	1	8	0	0	0	9	1	6	5	9	7	6.75
2011-12-12	Dec	summer 11 - 12	P10	Private	light	Sept early	present	7	1b	1	7	1	0	0	9	1	7	6	14	8	8.75
2011-12-12	Dec	summer 11 - 12	P10	Private	light	Sept early	present	7	2a	3	5	0	1	0	9	1	12	7	0	9	7
2011-12-12	Dec	summer 11 - 12	P10	Private	light	Sept early	present	7	2b	1	6	1	1	0	9	1	13	16	11	8	12
2011-12-12	Dec	summer 11 - 12	P10	Private	light	Sept early	present	7	3a	0	5	2	1	1	9	1	5	7	5	0	4.25
2011-12-12	Dec	summer 11 - 12	P10	Private	light	Sept early	present	7	3b	2	7	0	0	0	9	1	8	15	10	8	10.25
2011-12-12	Dec	summer 11 - 12	P10	Private	light	Sept early	present	7	4a	2	6	0	1	0	9	1	9	5	7	7	7
2011-12-12	Dec	summer 11 - 12	P10	Private	light	Sept early	present	7	4b	1	7	1	0	0	9	1	13	14	6	10	10.75
2011-12-12	Dec	summer 11 - 12	P10	Private	light	Sept early	present	7	5a	0	9	0	0	0	9	1	9	7	4	7	6.75
2011-12-12	Dec	summer 11 - 12	P10	Private	light	Sept early	present	7	5b	1	8	0	0	0	9	1	8	7	6	6	6.75
2011-12-12	Dec	summer 11 - 12	P10	Private	light	Sept early	present	7	6a	3	5	0	1	0	9	1	4	4	9	0	4.25
2011-12-12	Dec	summer 11 - 12	P10	Private	light	Sept early	present	7	6b	1	4	1	3	0	9	1	0	10	9	6	6.25
2011-12-12	Dec	summer 11 - 12	P10	Private	light	Sept early	present	7	7a	1	6	0	2	0	9	1	7	10	0	4	5.25
2011-12-12	Dec	summer 11 - 12	P10	Private	light	Sept early	present	7	7b	3	5	0	1	0	9	1	8	5	5	0	4.5
2011-12-12	Dec	summer 11 - 12	P10	Private	light	Sept early	present	7	8a	0	6	3	0	0	9	1	0	14	8	11	8.25
2011-12-12	Dec	summer 11 - 12	P10	Private	light	Sept early	present	7	8b	2	7	0	0	0	9	1	12	10	7	0	7.25
2011-12-12	Dec	summer 11 - 12	P10	Private	light	Sept early	present	7	9a	1	8	0	0	0	9	1	14	16	12	11	13.25
2011-12-12	Dec	summer 11 - 12	P10	Private	light	Sept early	present	7	9b	0	7	2	0	0	9	1	15	17	12	12	14
2011-12-12	Dec	summer 11 - 12	P10	Private	light	Sept early	present	7	10a	1	8	0	0	0	9	1	13	14	14	11	13
2011-12-12	Dec	summer 11 - 12	P10	Private	light	Sept early	present	7	10b	1	6	2	0	0	9	1	10	10	7	0	6.75
2011-12-12	Dec	summer 11 - 12	P41	Eskom	none	Aug late	present	5	1a	2	4	1	2	0	9	1	12	17	9	0	9.5
2011-12-12	Dec	summer 11 - 12	P50	Private	light	July late	absent	6	1a	2	6	0	1	0	9	1	9	12	13	8	10.5
2011-12-12	Dec	summer 11 - 12	P50	Private	light	July late	absent	6	1b	1	5	0	3	0	9	1	11	9	6	5	7.75
2011-12-12	Dec	summer 11 - 12	P50	Private	light	July late	absent	6	2a	3	6	0	0	0	9	1	7	6	9	0	5.5
2011-12-12	Dec	summer 11 - 12	P50	Private	light	July late	absent	6	2b	2	5	0	2	0	9	1	9	11	0	0	5
2011-12-12	Dec	summer 11 - 12	P50	Private	light	July late	absent	6	3a	1	4	1	3	0	9	1	3	11	5	7	6.5
2011-12-12	Dec	summer 11 - 12	P50	Private	light	July late	absent	6	3b	0	7	1	1	0	9	1	5	7	10	8	7.5
2011-12-12	Dec	summer 11 - 12	P50	Private	light	July late	absent	6	4a	4	5	0	0	0	9	1	7	5	7	0	4.75
2011-12-12	Dec	summer 11 - 12	P50	Private	light	July late	absent	6	4b	3	5	0	1	0	9	1	0	0	0	8	2
2011-12-12	Dec	summer 11 - 12	P50	Private	light	July late	absent	6	5a	2	6	0	1	0	9	1	9	7	10	0	6.5
2011-12-12	Dec	summer 11 - 12	P50	Private	light	July late	absent	6	5b	2	6	0	1	0	9	1	11	13	6	4	8.5
2011-12-12	Dec	summer 11 - 12	P50	Private	light	July late	absent	6	6a	2	7	0	0	0	9	1	6	6	4	9	6.25
2011-12-12	Dec	summer 11 - 12	P50	Private	light	July late	absent	6	6b	4	5	0	0	0	9	1	8	0	0	0	2
2011-12-12	Dec	summer 11 - 12	P50	Private	light	July late	absent	6	7a	2	5	0	2	0	9	1	6	10	0	0	4
2011-12-12	Dec	summer 11 - 12	P50	Private	light	July late	absent	6	7b	3	4	1	1	0	9	1	9	5	15	0	7.25
2011-12-12	Dec	summer 11 - 12	P50	Private	light	July late	absent	6	8a	4	2	0	3	0	9	1	8	0	0	0	2
2011-12-12	Dec	summer 11 - 12	P50	Private	light	July late	absent	6	8b	3	3	2	1	0	9	1	6	14	0	0	5
2011-12-12	Dec	summer 11 - 12	P50	Private	light	July late	absent	6	9a	2	5	0	2	0	9	1	9	0	6	7	5.5
2011-12-12	Dec	summer 11 - 12	P50	Private	light	July late	absent	6	9b	5	3	0	1	0	9	1	12	0	0	0	3
2011-12-12	Dec	summer 11 - 12	P50	Private	light	July late	absent	6	10a	3	3	0	3	0	9	1	7	0	6	0	3.25
2011-12-12	Dec	summer 11 - 12	P50	Private	light	July late	absent	6	10b	5	3	1	0	0	9	1	11	0	0	0	2.75
2011-12-12	Dec	summer 11 - 12	P50	Private	light	July late	absent	6	1a	3	2	0	4	0	9	1	3	5	0	0	2
2011-12-12	Dec	summer 11 - 12	P50	Private	light	July late	absent	6	1b	4	3	0	2	0	9	1	6	0	0	0	1.5
2011-12-12	Dec	summer 11 - 12	P50	Private	light	July late	absent	6	2a	2	5	0	2	0	9	1	10	8	7	0	6.25
2011-12-12	Dec	summer 11 - 12	P50	Private	light	July late	absent	6	2b	2	4	0	3	0	9	1	9	0	0	0	2.25
2011-12-12	Dec	summer 11 - 12	P50	Private	light	July late	absent	6	3a	3	5	0	1	0	9	1	7	0	6	8	5.25
2011-12-12	Dec	summer 11 - 12	P50	Private	light	July late	absent	6	3b	0	7	0	2	0	9	1	5	6	6	9	6.5
2011-12-12	Dec	summer 11 - 12	P50	Private	light	July late	absent	6	4a	1	5	0	3	0	9	1	5	9	0	0	3.5
2011-12-12	Dec	summer 11 - 12	P50	Private	light	July late	absent	6	4b	2	7	0	0	0	9	1	8	6	5	5	6
2011-12-12	Dec	summer 11 - 12	P50	Private	light	July late	absent	6	5a	1	6	1	1	0	9	1	5	11	8	9	8.25
2011-12-12	Dec	summer 11 - 12	P50	Private	light	July late	absent	6	5b	2	5	0	2	0	9	1	12	14	0	0	6.5
2011-12-12	Dec	summer 11 - 12	P50	Private	light	July late	absent	6	6a	2	7	0	0	0	9	1	8	9	9	0	6.5
2011-12-12	Dec	summer 11 - 12	P50	Private	light	July late	absent	6	6b	1	7	0	1	0	9	1	7	9	11	10	9.25
2011-12-12	Dec	summer 11 - 12	P50	Private	light	July late	absent	6	7a	2	6	0	1	0	9	1	11	14	12	0	9.25
2011-12-12	Dec	summer 11 - 12	P50	Private	light	July late	absent	6	7b	4	5	0	0	0	9	1	16	13	0	0	7.25
2011-12-12	Dec	summer 11 - 12	P50	Private	light	July late	absent	6	8a	3	3	0	3	0	9	1	10	13	6	0	7.25
2011-12-12	Dec	summer 11 - 12	P50	Private	light	July late	absent	6	8b	4	4	0	1	0	9	1	7	0	0	0	1.75
2011-12-12	Dec	summer 11 - 12	P50	Private	light	July late	absent	6	9a	0	6	0	3	0	9	1	13	10	8	8	9.75
2011-12-12	Dec	summer 11 - 12	P50	Private	light	July late	absent	6	9b	2	2	0	5	0	9	1	12	10	0	0	5.5
2011-12-12	Dec	summer 11 - 12	P50	Private	light	July late	absent	6	10a	2	6	0	1	0	9	1	10	11	0	0	5.25
2011-12-12	Dec	summer 11 - 12	P50	Private	light	July late	absent	6	10b	3	5	0	1	0	9	1	0	12	9	8	7.25
2011-12-12	Dec	summer 11 - 12	P54	Private	heavy	July late	present	6	1a	2	6	0	1	0	9	1	9	12	14	8	10.75
2011-12-12	Dec	summer 11 - 12	P54	Private	heavy	July late	present	6	1b	1	5	0	3	0	9	1	11	9	6	5	7.75
2011-12-12	Dec	summer 11 - 12	P54	Private	heavy	July late	present	6	2a	3	6	0	0	0	9	1	7	6	9	0	5.5
2011-12-12	Dec	summer 11 - 12	P54	Private	heavy	July late	present	6	2b	2	5	0	2	0	9	1	9	11	0	0	5
2011-12-12	Dec	summer 11 - 12	P54	Private	heavy	July late	present	6	3a	1	4	1	3	0	9	1	3	11	5	7	6.5
2011-12-12	Dec	summer 11 - 12	P54	Private	heavy	July late	present	6	3b	0	7	1	1	0	9	1	5	7	10	8	7.5
2011-12-12	Dec	summer 11 - 12	P54	Private	heavy	July late	present	6	4a	4	5	0	0	0	9	1	7	5	7	0	4.75
2011-12-12	Dec	summer 11 - 12	P54	Private	heavy	July late	present	6	4b	3	5	0	1	0	9	1	0	0	0	8	2
2011-12-12	Dec	summer 11 - 12	P54	Private	heavy	July late	present	6	5a	2	6	0	1	0	9	1	9	7	10	0	6.5
2011-12-12	Dec	summer 11 - 12	P54	Private	heavy	July late	present	6	5b	0	7	0	2	0	9	1	11	13	6	4	8.5
2011-12-12	Dec	summer 11 - 12	P54	Private	heavy	July late	present	6	6a	2	7	0	0	0	9	1	6	6	4	9	6.25
2011-12-12	Dec	summer 11 - 12	P54	Private	heavy	July late	present	6	6b	4	5	0	0	0	9	1	8	0	0	0	2
2011-12-12	Dec	summer 11 - 12	P54	Private	heavy	July late	present	6	7a	2	5	0	2	0	9	1	6	10	0	0	4
2011-12-12	Dec	summer 11 - 12	P54	Private	heavy	July late	present	6	7b	3	4	1	1	0	9	1	9	5	16	0	7.5
2011-12-12	Dec	summer 11 - 12	P54	Private	heavy	July late	present	6	8a	4	2	0	3	0	9	1	8	0	0	0	2
2011-12-12	Dec	summer 11 - 12	P54	Private	heavy	July late	present	6	8b	3	3	2	1	0	9	1	6	14	0	0	5
2011-12-12	Dec	summer 11 - 12	P54	Private	heavy	July late	present	6	9a	2	5	0	2	0	9	1	9	0	6	7	5.5
2011-12-12	Dec	summer 11 - 12	P54	Private	heavy	July late	present	6	9b	5	3	0	1	0	9	1	12	0	0	0	3
2011-12-12	Dec	summer 11 - 12	P54	Private	heavy	July late	present	6	10a	3	3	0	3	0	9	1	7	0	0	0	1.75
2011-12-12	Dec	summer 11 - 12	P54	Private	heavy	July late	present	6	10b	5	3	1	0	0	9	1	0	0	0	11	2.75
2011-12-12	Dec	summer 11 - 12	P57	Private	heavy	Aug mid	present	3	1a	3	5	1	0	0	9	1	7	4	6	13	7.5
2011-12-12	Dec	summer 11 - 12	P57	Private	heavy	Aug mid	present	3	1b	5	4	0	0	0	9	1	10	7	4	7	7
2011-12-12	Dec	summer 11 - 12	P57	Private	heavy	Aug mid	present	3	2a	4	3	0	2	0	9	1	7	4	9	5	6.25
2011-12-12	Dec	summer 11 - 12	P57	Private	heavy	Aug mid	present	3	2b	0	6	2	1	0	9	1	8	11	18	9	11.5
2011-12-12	Dec	summer 11 - 12	P57	Private	heavy	Aug mid	present	3	3a	1	4	1	3	0	9	1	5	6	8	0	4.75
2011-12-12	Dec	summer 11 - 12	P57	Private	heavy	Aug mid	present	3	3b	3	5	0	1	0	9	1	8	8	7	5	7
2011-12-12	Dec	summer 11 - 12	P57	Private	heavy	Aug mid	present	3	4a	2	6	1	0	0	9	1	6	8	6	7	6.75
2011-12-12	Dec	summer 11 - 12	P57	Private	heavy	Aug mid	present	3	4b	1	5	1	2	0	9	1	9	10	12	7	9.5
2011-12-12	Dec	summer 11 - 12	P57	Private	heavy	Aug mid	present	3	5a	4	5	0	0	0	9	1	11	9	8	6	8.5
2011-12-12	Dec	summer 11 - 12	P57	Private	heavy	Aug mid	present	3	5b	2	7	0	0	0	9	1	7	12	11	14	11
2011-12-12	Dec	summer 11 - 12	P57	Private	heavy	Aug mid	present	3	6a	0	7	2	0	0	9	1	6	6	5	9	6.5
2011-12-12	Dec	summer 11 - 12	P57	Private	heavy	Aug mid	present	3	6b	1	8	0	0	0	9	1	9	6	5	9	7.25
2011-12-12	Dec	summer 11 - 12	P57	Private	heavy	Aug mid	present	3	7a	0	5	0	4	0	9	1	10	4	4	0	4.5
2011-12-12	Dec	summer 11 - 12	P57	Private	heavy	Aug mid	present	3	7b	3	3	0	3	0	9	1	9	0	0	0	2.25
2011-12-12	Dec	summer 11 - 12	P57	Private	heavy	Aug mid	present	3	8a	5	3	0	1	0	9	1	11	7	0	0	4.5
2011-12-12	Dec	summer 11 - 12	P57	Private	heavy	Aug mid	present	3	8b	3	2	0	4	0	9	1	0	0	12	8	5
2011-12-12	Dec	summer 11 - 12	P57	Private	heavy	Aug mid	present	3	9a	1	6	0	2	0	9	1	13	11	10	5	9.75
2011-12-12	Dec	summer 11 - 12	P57	Private	heavy	Aug mid	present	3	9b	5	2	1	1	0	9	1	10	0	0	0	2.5
2011-12-12	Dec	summer 11 - 12	P57	Private	heavy	Aug mid	present	3	10a	2	1	0	6	0	9	1	7	9	9	8	8.25
2011-12-12	Dec	summer 11 - 12	P57	Private	heavy	Aug mid	present	3	10b	2	6	0	1	0	9	1	11	5	6	13	8.75
2011-12-13	Dec	summer 11 - 12	P40	Eskom	light	Aug late	present	7	1a	3	6	0	0	0	9	1	9	7	10	0	6.5
2011-12-13	Dec	summer 11 - 12	P40	Eskom	light	Aug late	present	7	1b	3	1	0	2	3	9	1	5	0	0	0	1.25
2011-12-13	Dec	summer 11 - 12	P40	Eskom	light	Aug late	present	7	2a	0	4	2	3	0	9	1	4	2	12	0	4.5
2011-12-13	Dec	summer 11 - 12	P40	Eskom	light	Aug late	present	7	2b	2	5	0	2	0	9	1	6	10	7	10	8.25
2011-12-13	Dec	summer 11 - 12	P40	Eskom	light	Aug late	present	7	3a	0	7	0	2	0	9	1	7	4	4	6	5.25
2011-12-13	Dec	summer 11 - 12	P40	Eskom	light	Aug late	present	7	3b	3	5	0	1	0	9	1	15	13	16	14	14.5
2011-12-13	Dec	summer 11 - 12	P40	Eskom	light	Aug late	present	7	4a	2	4	0	3	0	9	1	5	3	6	6	5
2011-12-13	Dec	summer 11 - 12	P40	Eskom	light	Aug late	present	7	4b	1	5	3	0	0	9	1	15	5	7	6	8.25
2011-12-13	Dec	summer 11 - 12	P40	Eskom	light	Aug late	present	7	5a	0	8	0	1	0	9	1	12	8	11	0	7.75
2011-12-13	Dec	summer 11 - 12	P40	Eskom	light	Aug late	present	7	5b	3	3	0	3	0	9	1	8	0	0	0	2
2011-12-13	Dec	summer 11 - 12	P40	Eskom	light	Aug late	present	7	6a	5	4	0	0	0	9	1	7	0	8	10	6.25
2011-12-13	Dec	summer 11 - 12	P40	Eskom	light	Aug late	present	7	6b	0	4	2	3	0	9	1	28	0	10	12	12.5
2011-12-13	Dec	summer 11 - 12	P40	Eskom	light	Aug late	present	7	7a	0	7	0	2	0	9	1	7	9	6	10	8
2011-12-13	Dec	summer 11 - 12	P40	Eskom	light	Aug late	present	7	7b	0	6	0	3	0	9	1	0	0	0	0	0
2011-12-13	Dec	summer 11 - 12	P40	Eskom	light	Aug late	present	7	8a	2	5	0	2	0	9	1	9	8	9	10	9
2011-12-13	Dec	summer 11 - 12	P40	Eskom	light	Aug late	present	7	8b	0	5	0	4	0	9	1	8	9	0	6	5.75
2011-12-13	Dec	summer 11 - 12	P40	Eskom	light	Aug late	present	7	9a	2	4	0	3	0	9	1	7	8	4	0	4.75
2011-12-13	Dec	summer 11 - 12	P40	Eskom	light	Aug late	present	7	9b	1	6	0	2	0	9	1	5	8	6	7	6.5
2011-12-13	Dec	summer 11 - 12	P40	Eskom	light	Aug late	present	7	10a	0	9	0	0	0	9	1	14	5	13	6	9.5
2011-12-13	Dec	summer 11 - 12	P40	Eskom	light	Aug late	present	7	10b	3	6	0	0	0	9	1	7	6	2	0	3.75
2011-12-14	Dec	summer 11 - 12	P22	Eskom	none	Oct mid	present	11	1a	4	3	2	0	0	9	1	7	5	0	0	3
2011-12-14	Dec	summer 11 - 12	P22	Eskom	none	Oct mid	present	11	1b	3	6	0	0	0	9	1	9	10	5	13	9.25
2011-12-14	Dec	summer 11 - 12	P22	Eskom	none	Oct mid	present	11	2a	1	5	0	3	0	9	1	5	4	5	13	6.75
2011-12-14	Dec	summer 11 - 12	P22	Eskom	none	Oct mid	present	11	2b	0	6	1	2	0	9	1	7	8	10	11	9
2011-12-14	Dec	summer 11 - 12	P22	Eskom	none	Oct mid	present	11	3a	0	7	1	1	0	9	1	10	7	11	20	12
2011-12-14	Dec	summer 11 - 12	P22	Eskom	none	Oct mid	present	11	3b	1	2	3	3	0	9	1	12	6	10	0	7
2011-12-14	Dec	summer 11 - 12	P22	Eskom	none	Oct mid	present	11	4a	0	3	2	4	0	9	1	13	0	0	6	4.75
2011-12-14	Dec	summer 11 - 12	P22	Eskom	none	Oct mid	present	11	4b	2	1	4	2	0	9	1	16	10	0	0	6.5
2011-12-14	Dec	summer 11 - 12	P22	Eskom	none	Oct mid	present	11	5a	0	6	0	3	0	9	1	14	21	10	0	11.25
2011-12-14	Dec	summer 11 - 12	P22	Eskom	none	Oct mid	present	11	5b	3	4	0	2	0	9	1	9	0	0	0	2.25
2011-12-14	Dec	summer 11 - 12	P22	Eskom	none	Oct mid	present	11	6a	4	1	0	4	0	9	1	10	0	0	4	3.5
2011-12-14	Dec	summer 11 - 12	P22	Eskom	none	Oct mid	present	11	6b	3	3	0	3	0	9	1	16	11	0	6	8.25
2011-12-14	Dec	summer 11 - 12	P22	Eskom	none	Oct mid	present	11	7a	2	5	0	2	0	9	1	4	9	6	6	6.25
2011-12-14	Dec	summer 11 - 12	P22	Eskom	none	Oct mid	present	11	7b	6	3	0	0	0	9	1	13	8	0	0	5.25
2011-12-14	Dec	summer 11 - 12	P22	Eskom	none	Oct mid	present	11	8a	0	1	4	4	0	9	1	0	0	14	22	9
2011-12-14	Dec	summer 11 - 12	P22	Eskom	none	Oct mid	present	11	8b	0	5	0	4	0	9	1	19	10	0	0	7.25
2011-12-14	Dec	summer 11 - 12	P22	Eskom	none	Oct mid	present	11	9a	0	6	1	2	0	9	1	11	8	8	12	9.75
2011-12-14	Dec	summer 11 - 12	P22	Eskom	none	Oct mid	present	11	9b	2	7	0	0	0	9	1	13	14	10	0	9.25
2011-12-14	Dec	summer 11 - 12	P22	Eskom	none	Oct mid	present	11	10a	0	4	0	5	0	9	1	10	9	7	2	7
2011-12-14	Dec	summer 11 - 12	P22	Eskom	none	Oct mid	present	11	10b	4	2	0	3	0	9	1	14	0	0	5	4.75
2011-12-14	Dec	summer 11 - 12	P38	Eskom	none	Oct mid	present	9	1a	3	4	0	2	0	9	1	12	6	8	6	8
2011-12-14	Dec	summer 11 - 12	P38	Eskom	none	Oct mid	present	9	1b	0	9	0	0	0	9	1	6	5	6	4	5.25
2011-12-14	Dec	summer 11 - 12	P38	Eskom	none	Oct mid	present	9	2a	5	4	0	0	0	9	1	9	8	6	8	7.75
2011-12-14	Dec	summer 11 - 12	P38	Eskom	none	Oct mid	present	9	2b	3	2	3	1	0	9	1	7	0	0	0	1.75
2011-12-14	Dec	summer 11 - 12	P38	Eskom	none	Oct mid	present	9	3a	2	5	2	0	0	9	1	10	8	11	5	8.5
2011-12-14	Dec	summer 11 - 12	P38	Eskom	none	Oct mid	present	9	3b	0	6	0	3	0	9	1	5	7	7	9	7
2011-12-14	Dec	summer 11 - 12	P38	Eskom	none	Oct mid	present	9	4a	2	3	0	4	0	9	1	19	9	8	10	11.5
2011-12-14	Dec	summer 11 - 12	P38	Eskom	none	Oct mid	present	9	4b	0	2	5	2	0	9	1	9	5	7	23	11
2011-12-14	Dec	summer 11 - 12	P38	Eskom	none	Oct mid	present	9	5a	1	8	0	0	0	9	1	7	9	12	7	8.75
2011-12-14	Dec	summer 11 - 12	P38	Eskom	none	Oct mid	present	9	5b	2	7	0	0	0	9	1	14	16	9	8	11.75
2011-12-14	Dec	summer 11 - 12	P38	Eskom	none	Oct mid	present	9	6a	0	5	0	4	0	9	1	10	8	11	10	9.75
2011-12-14	Dec	summer 11 - 12	P38	Eskom	none	Oct mid	present	9	6b	3	3	1	2	0	9	1	6	9	8	8	7.75
2011-12-14	Dec	summer 11 - 12	P38	Eskom	none	Oct mid	present	9	7a	0	2	2	5	0	9	1	9	7	0	0	4
2011-12-14	Dec	summer 11 - 12	P38	Eskom	none	Oct mid	present	9	7b	3	6	0	0	0	9	1	6	8	12	9	8.75
2011-12-14	Dec	summer 11 - 12	P38	Eskom	none	Oct mid	present	9	8a	4	5	0	0	0	9	1	11	13	7	9	10
2011-12-14	Dec	summer 11 - 12	P38	Eskom	none	Oct mid	present	9	8b	4	4	1	0	0	9	1	6	4	9	11	7.5
2011-12-14	Dec	summer 11 - 12	P38	Eskom	none	Oct mid	present	9	9a	2	4	3	0	0	9	1	7	16	0	6	7.25
2011-12-14	Dec	summer 11 - 12	P38	Eskom	none	Oct mid	present	9	9b	1	7	0	1	0	9	1	5	9	5	7	6.5
2011-12-14	Dec	summer 11 - 12	P38	Eskom	none	Oct mid	present	9	10a	2	6	0	1	0	9	1	11	14	17	10	13
2011-12-14	Dec	summer 11 - 12	P38	Eskom	none	Oct mid	present	9	10b	3	3	1	2	0	9	1	13	13	15	0	10.25
2011-12-14	Dec	summer 11 - 12	P63	Private	heavy	Oct late	absent	11	1a	2	5	0	2	0	9	1	6	8	4	0	4.5
2011-12-14	Dec	summer 11 - 12	P63	Private	heavy	Oct late	absent	11	1b	5	3	0	1	0	9	1	10	9	15	11	11.25
2011-12-14	Dec	summer 11 - 12	P63	Private	heavy	Oct late	absent	11	2a	3	3	0	3	0	9	1	4	4	6	0	3.5
2011-12-14	Dec	summer 11 - 12	P63	Private	heavy	Oct late	absent	11	2b	1	4	4	0	0	9	1	13	11	16	9	12.25
2011-12-14	Dec	summer 11 - 12	P63	Private	heavy	Oct late	absent	11	3a	0	4	2	3	0	9	1	9	12	0	4	6.25
2011-12-14	Dec	summer 11 - 12	P63	Private	heavy	Oct late	absent	11	3b	2	7	0	0	0	9	1	5	5	4	0	3.5
2011-12-14	Dec	summer 11 - 12	P63	Private	heavy	Oct late	absent	11	4a	2	5	0	2	0	9	1	6	10	9	8	8.25
2011-12-14	Dec	summer 11 - 12	P63	Private	heavy	Oct late	absent	11	4b	1	4	1	3	0	9	1	8	7	4	4	5.75
2011-12-14	Dec	summer 11 - 12	P63	Private	heavy	Oct late	absent	11	5a	1	2	3	3	0	9	1	10	7	14	0	7.75
2011-12-14	Dec	summer 11 - 12	P63	Private	heavy	Oct late	absent	11	5b	5	4	0	0	0	9	1	0	0	0	5	1.25
2011-12-14	Dec	summer 11 - 12	P63	Private	heavy	Oct late	absent	11	6a	0	7	0	2	0	9	1	0	0	7	6	3.25
2011-12-14	Dec	summer 11 - 12	P63	Private	heavy	Oct late	absent	11	6b	0	2	3	4	0	9	1	21	9	2	0	8
2011-12-14	Dec	summer 11 - 12	P63	Private	heavy	Oct late	absent	11	7a	3	6	0	0	0	9	1	6	11	0	0	4.25
2011-12-14	Dec	summer 11 - 12	P63	Private	heavy	Oct late	absent	11	7b	0	8	0	1	0	9	1	8	5	0	7	5
2011-12-14	Dec	summer 11 - 12	P63	Private	heavy	Oct late	absent	11	8a	0	7	0	2	0	9	1	9	7	4	6	6.5
2011-12-14	Dec	summer 11 - 12	P63	Private	heavy	Oct late	absent	11	8b	0	8	0	1	0	9	1	5	4	6	9	6
2011-12-14	Dec	summer 11 - 12	P63	Private	heavy	Oct late	absent	11	9a	0	9	0	0	0	9	1	17	15	14	10	14
2011-12-14	Dec	summer 11 - 12	P63	Private	heavy	Oct late	absent	11	9b	0	8	0	1	0	9	1	10	13	9	7	9.75
2011-12-14	Dec	summer 11 - 12	P63	Private	heavy	Oct late	absent	11	10a	2	5	0	2	0	9	1	7	0	4	5	4
2011-12-14	Dec	summer 11 - 12	P63	Private	heavy	Oct late	absent	11	10b	0	7	0	2	0	9	1	5	10	9	0	6
2011-12-18	Dec	summer 11 - 12	P70	Eskom	none	not burned	present	6	1a	0	9	0	0	0	9	1	40	43	31	39	38.25
2011-12-18	Dec	summer 11 - 12	P70	Eskom	none	not burned	present	6	1b	0	9	0	0	0	9	1	36	46	44	44	42.5
2011-12-18	Dec	summer 11 - 12	P70	Eskom	none	not burned	present	6	2a	0	9	0	0	0	9	1	45	39	44	41	42.25
2011-12-18	Dec	summer 11 - 12	P70	Eskom	none	not burned	present	6	2b	0	9	0	0	0	9	1	42	44	41	42	42.25
2011-12-18	Dec	summer 11 - 12	P70	Eskom	none	not burned	present	6	3a	0	9	0	1	0	9	1	43	37	41	40	40.25
2011-12-18	Dec	summer 11 - 12	P70	Eskom	none	not burned	present	6	3b	1	8	0	0	0	9	1	39	40	40	41	40
2011-12-18	Dec	summer 11 - 12	P70	Eskom	none	not burned	present	6	4a	0	9	0	0	0	9	1	37	41	41	43	40.5
2011-12-18	Dec	summer 11 - 12	P70	Eskom	none	not burned	present	6	4b	1	8	0	0	0	9	1	42	45	37	34	39.5
2011-12-18	Dec	summer 11 - 12	P70	Eskom	none	not burned	present	6	5a	0	9	0	0	0	9	1	47	41	46	46	45
2011-12-18	Dec	summer 11 - 12	P70	Eskom	none	not burned	present	6	5b	0	9	0	0	0	9	1	40	40	42	43	41.25
2011-12-18	Dec	summer 11 - 12	P70	Eskom	none	not burned	present	6	6a	0	9	0	0	0	9	1	44	42	40	41	41.75
2011-12-18	Dec	summer 11 - 12	P70	Eskom	none	not burned	present	6	6b	1	8	0	0	0	9	1	42	44	39	44	42.25
2011-12-18	Dec	summer 11 - 12	P70	Eskom	none	not burned	present	6	7a	0	9	0	0	0	9	1	44	36	42	44	41.5
2011-12-18	Dec	summer 11 - 12	P70	Eskom	none	not burned	present	6	7b	0	9	0	0	0	9	1	37	39	40	40	39
2011-12-18	Dec	summer 11 - 12	P70	Eskom	none	not burned	present	6	8a	0	9	0	0	0	9	1	39	37	39	39	38.5
2011-12-18	Dec	summer 11 - 12	P70	Eskom	none	not burned	present	6	8b	0	9	0	0	0	9	1	41	39	39	37	39
2011-12-18	Dec	summer 11 - 12	P70	Eskom	none	not burned	present	6	9a	0	9	0	0	0	9	1	39	40	40	41	40
2011-12-18	Dec	summer 11 - 12	P70	Eskom	none	not burned	present	6	9b	0	9	0	0	0	9	1	41	42	41	41	41.25
2011-12-18	Dec	summer 11 - 12	P70	Eskom	none	not burned	present	6	10a	1	7	0	1	0	9	1	43	41	40	39	40.75
2011-12-19	Dec	summer 11 - 12	P39	Eskom	none	Aug late	present	9	10b	1	8	0	0	0	9	1	42	38	37	36	9
2011-12-19	Dec	summer 11 - 12	P39	Eskom	none	Aug late	present	9	1b	3	6	0	0	0	9	1	15	14	10	11	12.5
2011-12-19	Dec	summer 11 - 12	P39	Eskom	none	Aug late	present	9	2a	1	7	1	0	0	9	1	14	14	12	11	12.75
2011-12-19	Dec	summer 11 - 12	P39	Eskom	none	Aug late	present	9	2b	2	5	1	1	0	9	1	8	8	0	8	6
2011-12-19	Dec	summer 11 - 12	P39	Eskom	none	Aug late	present	9	3a	1	7	0	1	0	9	1	10	10	15	10	11.25
2011-12-19	Dec	summer 11 - 12	P39	Eskom	none	Aug late	present	9	3b	1	5	0	3	0	9	1	8	12	0	6	6.5
2011-12-19	Dec	summer 11 - 12	P39	Eskom	none	Aug late	present	9	4a	3	6	0	0	0	9	1	13	12	0	12	9.25
2011-12-19	Dec	summer 11 - 12	P39	Eskom	none	Aug late	present	9	4b	0	8	1	0	0	9	1	10	11	8	4	8.25
2011-12-19	Dec	summer 11 - 12	P39	Eskom	none	Aug late	present	9	5a	0	9	0	0	0	9	1	7	16	9	9	10.25
2011-12-19	Dec	summer 11 - 12	P39	Eskom	none	Aug late	present	9	5b	6	3	0	0	0	9	1	10	6	0	0	4
2011-12-19	Dec	summer 11 - 12	P39	Eskom	none	Aug late	present	9	6a	4	5	0	0	0	9	1	8	5	0	10	5.75
2011-12-19	Dec	summer 11 - 12	P39	Eskom	none	Aug late	present	9	6b	3	5	0	1	0	9	1	16	8	10	14	12
2011-12-19	Dec	summer 11 - 12	P39	Eskom	none	Aug late	present	9	7a	3	6	0	0	0	9	1	11	12	7	0	7.5
2011-12-19	Dec	summer 11 - 12	P39	Eskom	none	Aug late	present	9	7b	0	9	0	0	0	9	1	13	13	0	0	6.5
2011-12-19	Dec	summer 11 - 12	P39	Eskom	none	Aug late	present	9	8a	2	6	0	1	0	9	1	11	9	0	9	7.25
2011-12-19	Dec	summer 11 - 12	P39	Eskom	none	Aug late	present	9	8b	4	5	0	0	0	9	1	12	10	12	12	11.5
2011-12-19	Dec	summer 11 - 12	P39	Eskom	none	Aug late	present	9	9a	3	6	0	0	0	9	1	12	9	0	7	7
2011-12-19	Dec	summer 11 - 12	P39	Eskom	none	Aug late	present	9	9b	1	7	0	1	0	9	1	11	10	0	10	7.75
2011-12-19	Dec	summer 11 - 12	P39	Eskom	none	Aug late	present	9	10a	0	7	0	2	0	9	1	16	9	0	17	10.5
2011-12-19	Dec	summer 11 - 12	P39	Eskom	none	Aug late	present	9	10b	1	8	0	0	0	9	1	7	4	7	7	6.25
2011-12-19	Dec	summer 11 - 12	P41	Eskom	none	Aug late	present	10	1a	2	4	0	3	0	9	1	10	0	0	0	2.5
2011-12-19	Dec	summer 11 - 12	P41	Eskom	none	Aug late	present	10	1b	2	6	1	0	0	9	1	8	7	7	5	6.75
2011-12-19	Dec	summer 11 - 12	P41	Eskom	none	Aug late	present	10	2a	0	9	0	0	0	9	1	18	17	21	16	18
2011-12-19	Dec	summer 11 - 12	P41	Eskom	none	Aug late	present	10	2b	1	5	2	1	0	9	1	20	12	0	8	10
2011-12-19	Dec	summer 11 - 12	P41	Eskom	none	Aug late	present	10	3a	1	7	0	1	0	9	1	20	13	12	10	13.75
2011-12-19	Dec	summer 11 - 12	P41	Eskom	none	Aug late	present	10	3b	0	9	0	0	0	9	1	15	11	9	10	11.25
2011-12-19	Dec	summer 11 - 12	P41	Eskom	none	Aug late	present	10	4a	4	5	0	0	0	9	1	13	6	0	12	7.75
2011-12-19	Dec	summer 11 - 12	P41	Eskom	none	Aug late	present	10	4b	1	6	0	2	0	9	1	7	21	14	5	11.75
2011-12-19	Dec	summer 11 - 12	P41	Eskom	none	Aug late	present	10	5a	0	9	0	0	0	9	1	16	13	15	15	14.75
2011-12-19	Dec	summer 11 - 12	P41	Eskom	none	Aug late	present	10	5b	3	6	0	0	0	9	1	15	8	13	12	12
2011-12-19	Dec	summer 11 - 12	P41	Eskom	none	Aug late	present	10	6a	2	7	0	0	0	9	1	12	12	17	17	14.5
2011-12-19	Dec	summer 11 - 12	P41	Eskom	none	Aug late	present	10	6b	1	8	0	0	0	9	1	19	15	14	12	15
2011-12-19	Dec	summer 11 - 12	P41	Eskom	none	Aug late	present	10	7a	2	6	1	0	0	9	1	12	9	9	20	12.5
2011-12-19	Dec	summer 11 - 12	P41	Eskom	none	Aug late	present	10	7b	3	6	0	0	0	9	1	8	5	11	0	6
2011-12-19	Dec	summer 11 - 12	P41	Eskom	none	Aug late	present	10	8a	1	8	0	0	0	9	1	17	18	19	10	16
2011-12-19	Dec	summer 11 - 12	P41	Eskom	none	Aug late	present	10	8b	0	8	0	1	0	9	1	19	20	17	21	19.25
2011-12-19	Dec	summer 11 - 12	P41	Eskom	none	Aug late	present	10	9a	2	6	0	1	0	9	1	10	11	12	13	11.5
2011-12-19	Dec	summer 11 - 12	P41	Eskom	none	Aug late	present	10	9b	1	8	0	0	0	9	1	12	10	9	10	10.25
2011-12-19	Dec	summer 11 - 12	P41	Eskom	none	Aug late	present	10	10a	2	6	0	1	0	9	1	7	6	6	8	6.75
2011-12-19	Dec	summer 11 - 12	P41	Eskom	none	Aug late	present	10	10b	2	3	0	4	0	9	1	5	6	0	0	2.75
2011-12-20	Dec	summer 11 - 12	P07	Eskom	heavy	Oct early	present	7	1a	4	3	0	2	0	9	1	4	3	0	0	1.75
2011-12-20	Dec	summer 11 - 12	P07	Eskom	heavy	Oct early	present	7	1b	5	3	1	0	0	9	1	12	15	0	0	6.75
2011-12-20	Dec	summer 11 - 12	P07	Eskom	heavy	Oct early	present	7	2a	5	4	0	0	0	9	1	4	3	3	2	3
2011-12-20	Dec	summer 11 - 12	P07	Eskom	heavy	Oct early	present	7	2b	3	5	1	0	0	9	1	4	2	6	0	3
2011-12-20	Dec	summer 11 - 12	P07	Eskom	heavy	Oct early	present	7	3a	3	4	2	0	0	9	1	5	3	2	0	2.5
2011-12-20	Dec	summer 11 - 12	P07	Eskom	heavy	Oct early	present	7	3b	5	4	0	0	0	9	1	6	5	6	4	5.25
2011-12-20	Dec	summer 11 - 12	P07	Eskom	heavy	Oct early	present	7	4a	3	3	3	0	0	9	1	12	13	16	12	13.25
2011-12-20	Dec	summer 11 - 12	P07	Eskom	heavy	Oct early	present	7	4b	2	4	0	3	0	9	1	7	5	3	4	4.75
2011-12-20	Dec	summer 11 - 12	P07	Eskom	heavy	Oct early	present	7	5a	3	5	0	1	0	9	1	17	5	0	0	5.5
2011-12-20	Dec	summer 11 - 12	P07	Eskom	heavy	Oct early	present	7	5b	0	8	1	0	0	9	1	14	12	10	9	11.25
2011-12-20	Dec	summer 11 - 12	P07	Eskom	heavy	Oct early	present	7	6a	4	3	2	0	0	9	1	11	10	11	0	8
2011-12-20	Dec	summer 11 - 12	P07	Eskom	heavy	Oct early	present	7	6b	4	5	0	0	0	9	1	8	10	5	0	5.75
2011-12-20	Dec	summer 11 - 12	P07	Eskom	heavy	Oct early	present	7	7a	3	5	0	1	0	9	1	8	4	6	0	4.5
2011-12-20	Dec	summer 11 - 12	P07	Eskom	heavy	Oct early	present	7	7b	3	4	0	2	0	9	1	11	12	0	0	5.75
2011-12-20	Dec	summer 11 - 12	P07	Eskom	heavy	Oct early	present	7	8a	4	5	0	0	0	9	1	15	15	14	7	12.75
2011-12-20	Dec	summer 11 - 12	P07	Eskom	heavy	Oct early	present	7	8b	0	6	1	2	0	9	1	17	8	16	13	13.5
2011-12-20	Dec	summer 11 - 12	P07	Eskom	heavy	Oct early	present	7	9a	3	5	0	1	0	9	1	8	4	0	0	3
2011-12-20	Dec	summer 11 - 12	P07	Eskom	heavy	Oct early	present	7	9b	4	5	0	0	0	9	1	6	4	0	4	3.5
2011-12-20	Dec	summer 11 - 12	P07	Eskom	heavy	Oct early	present	7	10a	3	6	0	0	0	9	1	7	6	3	0	4
2011-12-20	Dec	summer 11 - 12	P07	Eskom	heavy	Oct early	present	7	10b	4	3	0	2	0	9	1	5	4	0	0	2.25
2011-12-20	Dec	summer 11 - 12	P42	Eskom	none	Oct late	absent	5	1a	0	4	3	2	0	9	1	13	15	12	17	14.25
2011-12-20	Dec	summer 11 - 12	P42	Eskom	none	Oct late	absent	5	1b	0	6	1	2	0	9	1	9	10	11	13	10.75
2011-12-20	Dec	summer 11 - 12	P42	Eskom	none	Oct late	absent	5	2a	1	5	2	1	0	9	1	16	13	9	15	13.25
2011-12-20	Dec	summer 11 - 12	P42	Eskom	none	Oct late	absent	5	2b	3	6	0	0	0	9	1	16	0	9	10	8.75
2011-12-20	Dec	summer 11 - 12	P42	Eskom	none	Oct late	absent	5	3a	0	9	0	0	0	9	1	15	17	12	10	13.5
2011-12-20	Dec	summer 11 - 12	P42	Eskom	none	Oct late	absent	5	3b	1	7	1	0	0	9	1	6	8	6	12	8
2011-12-20	Dec	summer 11 - 12	P42	Eskom	none	Oct late	absent	5	4a	1	6	1	1	0	9	1	8	17	9	3	9.25
2011-12-20	Dec	summer 11 - 12	P42	Eskom	none	Oct late	absent	5	4b	0	5	2	2	0	9	1	5	3	9	10	6.75
2011-12-20	Dec	summer 11 - 12	P42	Eskom	none	Oct late	absent	5	5a	1	5	0	3	0	9	1	6	12	10	11	9.75
2011-12-20	Dec	summer 11 - 12	P42	Eskom	none	Oct late	absent	5	5b	1	6	0	2	0	9	1	8	15	10	11	11
2011-12-20	Dec	summer 11 - 12	P42	Eskom	none	Oct late	absent	5	6a	0	9	0	0	0	9	1	5	11	13	9	9.5
2011-12-20	Dec	summer 11 - 12	P42	Eskom	none	Oct late	absent	5	6b	0	9	0	0	0	9	1	13	13	12	13	12.75
2011-12-20	Dec	summer 11 - 12	P42	Eskom	none	Oct late	absent	5	7a	0	7	1	1	0	9	1	14	7	9	10	10
2011-12-20	Dec	summer 11 - 12	P42	Eskom	none	Oct late	absent	5	7b	1	8	0	0	0	9	1	10	9	7	0	6.5
2011-12-20	Dec	summer 11 - 12	P42	Eskom	none	Oct late	absent	5	8a	2	7	0	0	0	9	1	12	7	0	3	5.5
2011-12-20	Dec	summer 11 - 12	P42	Eskom	none	Oct late	absent	5	8b	0	9	0	0	0	9	1	0	7	6	7	5
2011-12-20	Dec	summer 11 - 12	P42	Eskom	none	Oct late	absent	5	9a	1	8	0	0	0	9	1	9	15	6	3	8.25
2011-12-20	Dec	summer 11 - 12	P42	Eskom	none	Oct late	absent	5	9b	1	8	0	0	0	9	1	10	7	6	3	6.5
2011-12-20	Dec	summer 11 - 12	P42	Eskom	none	Oct late	absent	5	10a	3	6	0	0	0	9	1	6	9	7	10	8
2011-12-20	Dec	summer 11 - 12	P42	Eskom	none	Oct late	absent	5	10b	2	6	0	1	0	9	1	10	7	8	7	8
2011-12-20	Dec	summer 11 - 12	P64	Private	light	Oct late	absent	7	1a	7	1	1	0	0	9	1	15	0	0	0	3.75
2011-12-20	Dec	summer 11 - 12	P64	Private	light	Oct late	absent	7	1b	5	4	0	0	0	9	1	6	5	0	3	3.5
2011-12-20	Dec	summer 11 - 12	P64	Private	light	Oct late	absent	7	2a	6	0	3	0	0	9	1	7	4	3	3	4.25
2011-12-20	Dec	summer 11 - 12	P64	Private	light	Oct late	absent	7	2b	4	5	0	0	0	9	1	11	0	0	0	2.75
2011-12-20	Dec	summer 11 - 12	P64	Private	light	Oct late	absent	7	3a	5	2	0	2	0	9	1	3	3	0	0	1.5
2011-12-20	Dec	summer 11 - 12	P64	Private	light	Oct late	absent	7	3b	6	2	0	1	0	9	1	4	0	0	0	1
2011-12-20	Dec	summer 11 - 12	P64	Private	light	Oct late	absent	7	4a	7	2	0	0	0	9	1	0	0	0	0	0
2011-12-20	Dec	summer 11 - 12	P64	Private	light	Oct late	absent	7	4b	5	3	0	1	0	9	1	12	0	0	0	3
2011-12-20	Dec	summer 11 - 12	P64	Private	light	Oct late	absent	7	5a	4	5	0	0	0	9	1	8	6	0	0	3.5
2011-12-20	Dec	summer 11 - 12	P64	Private	light	Oct late	absent	7	5b	3	6	0	0	0	9	1	15	4	0	0	4.75
2011-12-20	Dec	summer 11 - 12	P64	Private	light	Oct late	absent	7	6a	2	5	0	2	0	9	1	14	0	0	0	3.5
2011-12-20	Dec	summer 11 - 12	P64	Private	light	Oct late	absent	7	6b	3	6	0	0	0	9	1	19	4	0	0	5.75
2011-12-20	Dec	summer 11 - 12	P64	Private	light	Oct late	absent	7	7a	5	4	0	0	0	9	1	6	0	0	0	1.5
2011-12-20	Dec	summer 11 - 12	P64	Private	light	Oct late	absent	7	7b	5	3	0	1	0	9	1	5	3	0	0	2
2011-12-20	Dec	summer 11 - 12	P64	Private	light	Oct late	absent	7	8a	3	2	4	0	0	9	1	8	5	0	0	3.25
2011-12-20	Dec	summer 11 - 12	P64	Private	light	Oct late	absent	7	8b	2	7	0	0	0	9	1	4	7	5	0	4
2011-12-20	Dec	summer 11 - 12	P64	Private	light	Oct late	absent	7	9a	3	2	2	2	0	9	1	6	6	0	0	3
2011-12-20	Dec	summer 11 - 12	P64	Private	light	Oct late	absent	7	9b	5	3	0	1	0	9	1	5	0	0	0	1.25
2011-12-20	Dec	summer 11 - 12	P64	Private	light	Oct late	absent	7	10a	1	8	0	0	0	9	1	5	0	0	0	1.25
2011-12-20	Dec	summer 11 - 12	P64	Private	light	Oct late	absent	7	10b	3	6	0	0	0	9	1	14	10	0	0	6
2011-12-20	Dec	summer 11 - 12	P65	Eskom	none	Oct late	absent	5	1a	3	3	0	3	0	9	1	20	13	0	0	8.25
2011-12-20	Dec	summer 11 - 12	P65	Eskom	none	Oct late	absent	5	1b	0	4	0	5	0	9	1	0	0	0	0	0
2011-12-20	Dec	summer 11 - 12	P65	Eskom	none	Oct late	absent	5	2a	1	1	7	0	0	9	1	8	5	19	9	10.25
2011-12-20	Dec	summer 11 - 12	P65	Eskom	none	Oct late	absent	5	2b	5	2	0	2	0	9	1	22	0	0	0	5.5
2011-12-20	Dec	summer 11 - 12	P65	Eskom	none	Oct late	absent	5	3a	5	4	0	0	0	9	1	10	15	0	0	6.25
2011-12-20	Dec	summer 11 - 12	P65	Eskom	none	Oct late	absent	5	3b	5	4	0	0	0	9	1	15	0	11	0	6.5
2011-12-20	Dec	summer 11 - 12	P65	Eskom	none	Oct late	absent	5	4a	7	2	0	0	0	9	1	11	0	0	0	2.75
2011-12-20	Dec	summer 11 - 12	P65	Eskom	none	Oct late	absent	5	4b	4	4	0	1	0	9	1	14	0	0	0	3.5
2011-12-20	Dec	summer 11 - 12	P65	Eskom	none	Oct late	absent	5	5a	2	4	0	3	0	9	1	15	0	7	0	5.5
2011-12-20	Dec	summer 11 - 12	P65	Eskom	none	Oct late	absent	5	5b	3	0	2	4	0	9	1	14	0	0	0	3.5
2011-12-20	Dec	summer 11 - 12	P65	Eskom	none	Oct late	absent	5	6a	2	2	2	3	0	9	1	19	12	0	0	7.75
2011-12-20	Dec	summer 11 - 12	P65	Eskom	none	Oct late	absent	5	6b	5	4	0	0	0	9	1	14	12	0	10	9
2011-12-20	Dec	summer 11 - 12	P65	Eskom	none	Oct late	absent	5	7a	4	2	0	3	0	9	1	16	12	0	10	9.5
2011-12-20	Dec	summer 11 - 12	P65	Eskom	none	Oct late	absent	5	7b	4	3	0	2	0	9	1	11	7	0	11	7.25
2011-12-20	Dec	summer 11 - 12	P65	Eskom	none	Oct late	absent	5	8a	1	2	4	2	0	9	1	10	11	13	22	14
2011-12-20	Dec	summer 11 - 12	P65	Eskom	none	Oct late	absent	5	8b	2	2	2	3	0	9	1	0	12	16	0	7
2011-12-20	Dec	summer 11 - 12	P65	Eskom	none	Oct late	absent	5	9a	1	5	0	3	0	9	1	13	16	12	0	10.25
2011-12-20	Dec	summer 11 - 12	P65	Eskom	none	Oct late	absent	5	9b	1	3	1	4	0	9	1	6	12	15	0	8.25
2011-12-20	Dec	summer 11 - 12	P65	Eskom	none	Oct late	absent	5	10a	3	2	0	4	0	9	1	16	6	10	0	8
2011-12-20	Dec	summer 11 - 12	P65	Eskom	none	Oct late	absent	5	10b	2	2	0	5	0	9	1	7	14	6	0	6.75
2011-12-20	Dec	summer 11 - 12	P66	Eskom	light	Nov early	absent	4	1a	2	5	0	2	0	9	1	10	13	0	0	5.75
2011-12-20	Dec	summer 11 - 12	P66	Eskom	light	Nov early	absent	4	1b	4	3	0	2	0	9	1	10	5	6	0	5.25
2011-12-20	Dec	summer 11 - 12	P66	Eskom	light	Nov early	absent	4	2a	0	4	2	3	0	9	1	8	0	10	17	8.75
2011-12-20	Dec	summer 11 - 12	P66	Eskom	light	Nov early	absent	4	2b	5	4	0	0	0	9	1	10	8	8	7	8.25
2011-12-20	Dec	summer 11 - 12	P66	Eskom	light	Nov early	absent	4	3a	4	2	0	3	0	9	1	6	0	0	0	1.5
2011-12-20	Dec	summer 11 - 12	P66	Eskom	light	Nov early	absent	4	3b	2	3	0	4	0	9	1	5	10	8	4	6.75
2011-12-20	Dec	summer 11 - 12	P66	Eskom	light	Nov early	absent	4	4a	5	4	0	0	0	9	1	7	0	0	0	1.75
2011-12-20	Dec	summer 11 - 12	P66	Eskom	light	Nov early	absent	4	4b	2	7	0	0	0	9	1	6	6	4	2	4.5
2011-12-20	Dec	summer 11 - 12	P66	Eskom	light	Nov early	absent	4	5a	1	4	0	4	0	9	1	4	0	0	0	1
2011-12-20	Dec	summer 11 - 12	P66	Eskom	light	Nov early	absent	4	5b	3	2	0	4	0	9	1	8	8	10	7	8.25
2011-12-20	Dec	summer 11 - 12	P66	Eskom	light	Nov early	absent	4	6a	0	3	0	6	0	9	1	6	6	8	0	5
2011-12-20	Dec	summer 11 - 12	P66	Eskom	light	Nov early	absent	4	6b	3	3	0	3	0	9	1	13	2	6	7	7
2011-12-20	Dec	summer 11 - 12	P66	Eskom	light	Nov early	absent	4	7a	2	4	0	3	0	9	1	8	7	8	6	7.25
2011-12-20	Dec	summer 11 - 12	P66	Eskom	light	Nov early	absent	4	7b	3	6	0	0	0	9	1	9	7	0	0	4
2011-12-20	Dec	summer 11 - 12	P66	Eskom	light	Nov early	absent	4	8a	0	5	0	4	0	9	1	6	12	5	8	7.75
2011-12-20	Dec	summer 11 - 12	P66	Eskom	light	Nov early	absent	4	8b	0	7	0	2	0	9	1	7	8	6	6	6.75
2011-12-20	Dec	summer 11 - 12	P66	Eskom	light	Nov early	absent	4	9a	0	8	0	1	0	9	1	30	20	21	0	17.75
2011-12-20	Dec	summer 11 - 12	P66	Eskom	light	Nov early	absent	4	9b	2	3	2	2	0	9	1	20	18	0	0	9.5
2011-12-20	Dec	summer 11 - 12	P66	Eskom	light	Nov early	absent	4	10a	2	5	1	1	0	9	1	14	6	9	10	9.75
2011-12-20	Dec	summer 11 - 12	P66	Eskom	light	Nov early	absent	4	10b	0	6	3	0	0	9	1	10	17	20	9	14
2012-01-01	Jan	summer 11 - 12	P22	Eskom	none	Oct mid	present	13	1a	1	4	0	4	0	9	1	12	12	0	5	7.25
2012-01-01	Jan	summer 11 - 12	P22	Eskom	none	Oct mid	present	13	1b	0	7	0	2	0	9	1	9	12	10	10	10.25
2012-01-01	Jan	summer 11 - 12	P22	Eskom	none	Oct mid	present	13	2a	1	3	2	3	0	9	1	12	10	15	9	11.5
2012-01-01	Jan	summer 11 - 12	P22	Eskom	none	Oct mid	present	13	2b	1	1	3	4	0	9	1	13	0	0	0	3.25
2012-01-01	Jan	summer 11 - 12	P22	Eskom	none	Oct mid	present	13	3a	2	4	1	2	0	9	1	12	12	11	0	8.75
2012-01-01	Jan	summer 11 - 12	P22	Eskom	none	Oct mid	present	13	3b	3	6	0	0	0	9	1	10	11	0	0	5.25
2012-01-01	Jan	summer 11 - 12	P22	Eskom	none	Oct mid	present	13	4a	1	5	0	3	0	9	1	12	0	11	7	7.5
2012-01-01	Jan	summer 11 - 12	P22	Eskom	none	Oct mid	present	13	4b	0	7	1	1	0	9	1	13	9	6	0	7
2012-01-01	Jan	summer 11 - 12	P22	Eskom	none	Oct mid	present	13	5a	2	3	2	2	0	9	1	0	7	10	8	6.25
2012-01-01	Jan	summer 11 - 12	P22	Eskom	none	Oct mid	present	13	5b	0	6	0	3	0	9	1	6	8	8	0	5.5
2012-01-01	Jan	summer 11 - 12	P22	Eskom	none	Oct mid	present	13	6a	3	5	0	1	0	9	1	11	13	9	13	11.5
2012-01-01	Jan	summer 11 - 12	P22	Eskom	none	Oct mid	present	13	6b	2	7	0	0	0	9	1	6	9	14	9	9.5
2012-01-01	Jan	summer 11 - 12	P22	Eskom	none	Oct mid	present	13	7a	5	1	0	3	0	9	1	9	0	0	0	2.25
2012-01-01	Jan	summer 11 - 12	P22	Eskom	none	Oct mid	present	13	7b	3	5	0	1	0	9	1	6	9	15	9	9.75
2012-01-01	Jan	summer 11 - 12	P22	Eskom	none	Oct mid	present	13	8a	2	4	0	3	0	9	1	0	5	0	4	2.25
2012-01-01	Jan	summer 11 - 12	P22	Eskom	none	Oct mid	present	13	8b	0	5	2	2	0	9	1	11	7	7	6	7.75
2012-01-01	Jan	summer 11 - 12	P22	Eskom	none	Oct mid	present	13	9a	0	6	0	3	0	9	1	7	12	12	13	11
2012-01-01	Jan	summer 11 - 12	P22	Eskom	none	Oct mid	present	13	9b	0	2	2	5	0	9	1	4	6	9	0	4.75
2012-01-01	Jan	summer 11 - 12	P22	Eskom	none	Oct mid	present	13	10a	2	5	1	1	0	9	1	10	10	0	11	7.75
2012-01-01	Jan	summer 11 - 12	P22	Eskom	none	Oct mid	present	13	10b	3	2	0	4	0	9	1	15	0	0	0	3.75
2012-01-06	Jan	summer 11 - 12	P01	Eskom	heavy	Oct mid	present	10	1a	0	5	1	3	0	9	1	3	5	0	4	3
2012-01-06	Jan	summer 11 - 12	P01	Eskom	heavy	Oct mid	present	10	1b	0	8	0	1	0	9	1	6	5	4	4	4.75
2012-01-06	Jan	summer 11 - 12	P01	Eskom	heavy	Oct mid	present	10	2a	4	4	0	1	0	9	1	10	9	0	0	4.75
2012-01-06	Jan	summer 11 - 12	P01	Eskom	heavy	Oct mid	present	10	2b	0	7	0	2	0	9	1	17	9	10	11	11.75
2012-01-06	Jan	summer 11 - 12	P01	Eskom	heavy	Oct mid	present	10	3a	2	5	0	2	0	9	1	13	13	0	4	7.5
2012-01-06	Jan	summer 11 - 12	P01	Eskom	heavy	Oct mid	present	10	3b	4	5	0	0	0	9	1	14	10	12	7	10.75
2012-01-06	Jan	summer 11 - 12	P01	Eskom	heavy	Oct mid	present	10	4a	2	5	0	2	0	9	1	6	9	0	0	3.75
2012-01-06	Jan	summer 11 - 12	P01	Eskom	heavy	Oct mid	present	10	4b	2	4	0	3	0	9	1	11	15	7	0	8.25
2012-01-06	Jan	summer 11 - 12	P01	Eskom	heavy	Oct mid	present	10	5a	3	5	0	1	0	9	1	10	12	11	0	8.25
2012-01-06	Jan	summer 11 - 12	P01	Eskom	heavy	Oct mid	present	10	5b	1	5	1	2	0	9	1	0	7	11	0	4.5
2012-01-06	Jan	summer 11 - 12	P01	Eskom	heavy	Oct mid	present	10	6a	4	3	0	2	0	9	1	10	0	0	0	2.5
2012-01-06	Jan	summer 11 - 12	P01	Eskom	heavy	Oct mid	present	10	6b	0	6	0	3	0	9	1	11	4	0	0	3.75
2012-01-06	Jan	summer 11 - 12	P01	Eskom	heavy	Oct mid	present	10	7a	2	6	0	1	0	9	1	4	9	6	0	4.75
2012-01-06	Jan	summer 11 - 12	P01	Eskom	heavy	Oct mid	present	10	7b	1	7	0	1	0	9	1	6	9	7	11	8.25
2012-01-06	Jan	summer 11 - 12	P01	Eskom	heavy	Oct mid	present	10	8a	3	6	0	0	0	9	1	13	13	11	0	9.25
2012-01-06	Jan	summer 11 - 12	P01	Eskom	heavy	Oct mid	present	10	8b	3	3	2	1	0	9	1	0	0	12	10	5.5
2012-01-06	Jan	summer 11 - 12	P01	Eskom	heavy	Oct mid	present	10	9a	1	7	0	1	0	9	1	6	6	0	4	4
2012-01-06	Jan	summer 11 - 12	P01	Eskom	heavy	Oct mid	present	10	9b	1	6	0	2	0	9	1	0	0	10	7	4.25
2012-01-06	Jan	summer 11 - 12	P01	Eskom	heavy	Oct mid	present	10	10a	3	3	0	3	0	9	1	0	0	5	7	3
2012-01-06	Jan	summer 11 - 12	P01	Eskom	heavy	Oct mid	present	10	10b	2	5	0	2	0	9	1	8	0	0	0	2
2012-01-06	Jan	summer 11 - 12	P10	Private	none	Sept early	present	9	1a	0	9	0	0	0	9	1	13	8	9	17	11.75
2012-01-06	Jan	summer 11 - 12	P10	Private	none	Sept early	present	9	1b	3	6	0	0	0	9	1	7	11	6	0	6
2012-01-06	Jan	summer 11 - 12	P10	Private	none	Sept early	present	9	2a	2	6	0	1	0	9	1	15	18	11	0	11
2012-01-06	Jan	summer 11 - 12	P10	Private	none	Sept early	present	9	2b	0	9	0	0	0	9	1	12	7	16	8	10.75
2012-01-06	Jan	summer 11 - 12	P10	Private	none	Sept early	present	9	3a	5	4	0	0	0	9	1	0	0	11	5	4
2012-01-06	Jan	summer 11 - 12	P10	Private	none	Sept early	present	9	3b	1	8	0	0	0	9	1	15	14	9	7	11.25
2012-01-06	Jan	summer 11 - 12	P10	Private	none	Sept early	present	9	4a	2	7	0	0	0	9	1	15	15	0	11	10.25
2012-01-06	Jan	summer 11 - 12	P10	Private	none	Sept early	present	9	4b	0	8	0	1	0	9	1	15	18	10	0	10.75
2012-01-06	Jan	summer 11 - 12	P10	Private	none	Sept early	present	9	5a	0	9	0	0	0	9	1	8	6	7	7	7
2012-01-06	Jan	summer 11 - 12	P10	Private	none	Sept early	present	9	5b	0	7	0	2	0	9	1	9	7	6	4	6.5
2012-01-06	Jan	summer 11 - 12	P10	Private	none	Sept early	present	9	6a	1	6	0	2	0	9	1	6	6	0	7	4.75
2012-01-06	Jan	summer 11 - 12	P10	Private	none	Sept early	present	9	6b	3	6	0	0	0	9	1	0	7	7	0	3.5
2012-01-06	Jan	summer 11 - 12	P10	Private	none	Sept early	present	9	7a	0	7	0	2	0	9	1	6	4	5	7	5.5
2012-01-06	Jan	summer 11 - 12	P10	Private	none	Sept early	present	9	7b	0	9	0	0	0	9	1	5	5	7	4	5.25
2012-01-06	Jan	summer 11 - 12	P10	Private	none	Sept early	present	9	8a	1	7	0	1	0	9	1	7	0	5	12	6
2012-01-06	Jan	summer 11 - 12	P10	Private	none	Sept early	present	9	8b	3	6	0	0	0	9	1	5	6	0	0	2.75
2012-01-06	Jan	summer 11 - 12	P10	Private	none	Sept early	present	9	9a	4	5	0	0	0	9	1	10	10	8	0	7
2012-01-06	Jan	summer 11 - 12	P10	Private	none	Sept early	present	9	9b	0	6	0	3	0	9	1	7	11	10	12	10
2012-01-06	Jan	summer 11 - 12	P10	Private	none	Sept early	present	9	10a	0	7	1	1	0	9	1	14	10	13	10	11.75
2012-01-06	Jan	summer 11 - 12	P10	Private	none	Sept early	present	9	10b	1	7	0	1	0	9	1	16	10	18	9	13.25
2012-01-06	Jan	summer 11 - 12	P50	Eskom	light	July late	absent	8	1a	1	7	0	1	0	9	1	11	7	5	9	8
2012-01-06	Jan	summer 11 - 12	P50	Private	light	July late	absent	8	1b	1	5	1	2	0	9	1	7	8	10	11	9
2012-01-06	Jan	summer 11 - 12	P50	Private	light	July late	absent	8	2a	3	6	0	0	0	9	1	5	4	6	10	6.25
2012-01-06	Jan	summer 11 - 12	P50	Private	light	July late	absent	8	2b	0	7	0	2	0	9	1	14	12	12	0	9.5
2012-01-06	Jan	summer 11 - 12	P50	Private	light	July late	absent	8	3a	0	7	1	1	0	9	1	13	16	14	10	13.25
2012-01-06	Jan	summer 11 - 12	P50	Private	light	July late	absent	8	3b	4	5	0	0	0	9	1	0	0	13	9	5.5
2012-01-06	Jan	summer 11 - 12	P50	Private	light	July late	absent	8	4a	2	4	0	3	0	9	1	7	9	0	0	4
2012-01-06	Jan	summer 11 - 12	P50	Private	light	July late	absent	8	4b	1	7	0	1	0	9	1	0	6	9	14	7.25
2012-01-06	Jan	summer 11 - 12	P50	Private	light	July late	absent	8	5a	2	5	0	2	0	9	1	0	4	0	0	1
2012-01-06	Jan	summer 11 - 12	P50	Private	light	July late	absent	8	5b	3	6	0	0	0	9	1	0	0	13	12	6.25
2012-01-06	Jan	summer 11 - 12	P50	Private	light	July late	absent	8	6a	0	4	0	5	0	9	1	8	0	0	0	2
2012-01-06	Jan	summer 11 - 12	P50	Private	light	July late	absent	8	6b	0	7	1	1	0	9	1	11	9	6	10	9
2012-01-06	Jan	summer 11 - 12	P50	Private	light	July late	absent	8	7a	1	5	1	2	0	9	1	7	0	6	3	4
2012-01-06	Jan	summer 11 - 12	P50	Private	light	July late	absent	8	7b	0	5	0	4	0	9	1	8	8	0	0	4
2012-01-06	Jan	summer 11 - 12	P50	Private	light	July late	absent	8	8a	2	7	0	0	0	9	1	7	10	11	9	9.25
2012-01-06	Jan	summer 11 - 12	P50	Private	light	July late	absent	8	8b	0	8	0	1	0	9	1	4	7	13	11	8.75
2012-01-06	Jan	summer 11 - 12	P50	Private	light	July late	absent	8	9a	3	6	0	0	0	9	1	9	9	7	4	7.25
2012-01-06	Jan	summer 11 - 12	P50	Private	light	July late	absent	8	9b	1	8	0	0	0	9	1	10	0	11	11	8
2012-01-06	Jan	summer 11 - 12	P50	Private	light	July late	absent	8	10a	0	7	0	2	0	9	1	8	10	0	0	4.5
2012-01-06	Jan	summer 11 - 12	P50	Private	light	July late	absent	8	10b	0	9	0	0	0	9	1	9	6	8	11	8.5
2012-01-06	Jan	summer 11 - 12	P54	Private	heavy	July late	absent	8	1a	3	3	0	3	0	9	1	4	0	0	0	1
2012-01-06	Jan	summer 11 - 12	P54	Private	heavy	July late	absent	8	1b	0	6	0	3	0	9	1	6	7	7	0	5
2012-01-06	Jan	summer 11 - 12	P54	Private	heavy	July late	absent	8	2a	2	4	1	2	0	9	1	13	12	0	0	6.25
2012-01-06	Jan	summer 11 - 12	P54	Private	heavy	July late	absent	8	2b	0	6	3	0	0	9	1	0	10	8	9	6.75
2012-01-06	Jan	summer 11 - 12	P54	Private	heavy	July late	absent	8	3a	0	8	0	1	0	9	1	5	0	9	11	6.25
2012-01-06	Jan	summer 11 - 12	P54	Private	heavy	July late	absent	8	3b	0	7	0	2	0	9	1	11	5	6	7	7.25
2012-01-06	Jan	summer 11 - 12	P54	Private	heavy	July late	absent	8	4a	2	6	0	1	0	9	1	6	5	10	0	5.25
2012-01-06	Jan	summer 11 - 12	P54	Private	heavy	July late	absent	8	4b	0	8	0	1	0	9	1	9	10	9	7	8.75
2012-01-06	Jan	summer 11 - 12	P54	Private	heavy	July late	absent	8	5a	1	7	0	1	0	9	1	6	9	0	9	6
2012-01-06	Jan	summer 11 - 12	P54	Private	heavy	July late	absent	8	5b	2	6	0	1	0	9	1	11	7	10	11	9.75
2012-01-06	Jan	summer 11 - 12	P54	Private	heavy	July late	absent	8	6a	1	6	1	1	0	9	1	13	10	9	0	8
2012-01-06	Jan	summer 11 - 12	P54	Private	heavy	July late	absent	8	6b	1	3	3	2	0	9	1	0	0	6	3	2.25
2012-01-06	Jan	summer 11 - 12	P54	Private	heavy	July late	absent	8	7a	4	5	0	0	0	9	1	9	8	0	0	4.25
2012-01-06	Jan	summer 11 - 12	P54	Private	heavy	July late	absent	8	7b	2	4	0	3	0	9	1	10	13	9	9	10.25
2012-01-06	Jan	summer 11 - 12	P54	Private	heavy	July late	absent	8	8a	1	5	1	2	0	9	1	12	6	8	3	7.25
2012-01-06	Jan	summer 11 - 12	P54	Private	heavy	July late	absent	8	8b	2	4	1	2	0	9	1	11	0	0	0	2.75
2012-01-06	Jan	summer 11 - 12	P54	Private	heavy	July late	absent	8	9a	4	3	0	2	0	9	1	10	6	9	0	6.25
2012-01-06	Jan	summer 11 - 12	P54	Private	heavy	July late	absent	8	9b	3	6	0	0	0	9	1	8	4	0	4	4
2012-01-06	Jan	summer 11 - 12	P54	Private	heavy	July late	absent	8	10a	0	6	0	3	0	9	1	11	9	4	6	7.5
2012-01-06	Jan	summer 11 - 12	P54	Private	heavy	July late	absent	8	10b	2	5	1	1	0	9	1	0	0	6	3	2.25
2012-01-06	Jan	summer 11 - 12	P57	Private	heavy	Aug mid	absent	11	1a	1	5	0	3	0	9	1	5	6	8	0	4.75
2012-01-06	Jan	summer 11 - 12	P57	Private	heavy	Aug mid	absent	11	1b	0	6	0	3	0	9	1	0	6	9	9	6
2012-01-06	Jan	summer 11 - 12	P57	Private	heavy	Aug mid	absent	11	2a	1	6	0	2	0	9	1	8	9	9	8	8.5
2012-01-06	Jan	summer 11 - 12	P57	Private	heavy	Aug mid	absent	11	2b	2	5	0	2	0	9	1	0	9	11	12	8
2012-01-06	Jan	summer 11 - 12	P57	Private	heavy	Aug mid	absent	11	3a	1	8	0	0	0	9	1	11	8	9	14	10.5
2012-01-06	Jan	summer 11 - 12	P57	Private	heavy	Aug mid	absent	11	3b	0	8	1	0	0	9	1	12	12	8	11	10.75
2012-01-06	Jan	summer 11 - 12	P57	Private	heavy	Aug mid	absent	11	4a	2	7	0	0	0	9	1	8	6	6	9	7.25
2012-01-06	Jan	summer 11 - 12	P57	Private	heavy	Aug mid	absent	11	4b	0	5	0	4	0	9	1	9	9	8	4	7.5
2012-01-06	Jan	summer 11 - 12	P57	Private	heavy	Aug mid	absent	11	5a	0	7	0	2	0	9	1	6	8	8	9	7.75
2012-01-06	Jan	summer 11 - 12	P57	Private	heavy	Aug mid	absent	11	5b	3	5	1	0	0	9	1	14	8	10	0	8
2012-01-06	Jan	summer 11 - 12	P57	Private	heavy	Aug mid	absent	11	6a	1	6	0	2	0	9	1	9	8	10	10	9.25
2012-01-06	Jan	summer 11 - 12	P57	Private	heavy	Aug mid	absent	11	6b	0	8	0	1	0	9	1	13	5	6	9	8.25
2012-01-06	Jan	summer 11 - 12	P57	Private	heavy	Aug mid	absent	11	7a	0	6	0	3	0	9	1	16	12	0	14	10.5
2012-01-06	Jan	summer 11 - 12	P57	Private	heavy	Aug mid	absent	11	7b	2	7	0	0	0	9	1	0	11	5	6	5.5
2012-01-06	Jan	summer 11 - 12	P57	Private	heavy	Aug mid	absent	11	8a	2	4	0	3	0	9	1	7	10	10	0	6.75
2012-01-06	Jan	summer 11 - 12	P57	Private	heavy	Aug mid	absent	11	8b	1	7	0	1	0	9	1	13	6	6	9	8.5
2012-01-06	Jan	summer 11 - 12	P57	Private	heavy	Aug mid	absent	11	9a	1	6	0	2	0	9	1	6	5	5	0	4
2012-01-06	Jan	summer 11 - 12	P57	Private	heavy	Aug mid	absent	11	9b	0	7	1	1	0	9	1	5	9	8	11	8.25
2012-01-06	Jan	summer 11 - 12	P57	Private	heavy	Aug mid	absent	11	10a	2	1	0	6	0	9	1	9	0	0	0	2.25
2012-01-06	Jan	summer 11 - 12	P57	Private	heavy	Aug mid	absent	11	10b	0	6	0	3	0	9	1	0	0	9	7	4
2012-01-09	Jan	summer 11 - 12	P03	Eskom	light	Oct late	present	9	1a	3	6	0	0	0	9	1	16	3	4	0	5.75
2012-01-09	Jan	summer 11 - 12	P03	Eskom	light	Oct late	present	9	1b	2	5	0	2	0	9	1	4	5	0	0	2.25
2012-01-09	Jan	summer 11 - 12	P03	Eskom	light	Oct late	present	9	2a	3	5	0	1	0	9	1	5	0	8	10	5.75
2012-01-09	Jan	summer 11 - 12	P03	Eskom	light	Oct late	present	9	2b	2	7	0	0	0	9	1	12	7	3	12	8.5
2012-01-09	Jan	summer 11 - 12	P03	Eskom	light	Oct late	present	9	3a	0	7	0	2	0	9	1	7	8	3	7	6.25
2012-01-09	Jan	summer 11 - 12	P03	Eskom	light	Oct late	present	9	3b	1	8	0	0	0	9	1	9	0	5	7	5.25
2012-01-09	Jan	summer 11 - 12	P03	Eskom	light	Oct late	present	9	4a	1	7	0	1	0	9	1	10	7	7	18	10.5
2012-01-09	Jan	summer 11 - 12	P03	Eskom	light	Oct late	present	9	4b	2	6	0	1	0	9	1	17	9	21	11	14.5
2012-01-09	Jan	summer 11 - 12	P03	Eskom	light	Oct late	present	9	5a	3	4	0	2	0	9	1	17	15	9	7	12
2012-01-09	Jan	summer 11 - 12	P03	Eskom	light	Oct late	present	9	5b	2	6	0	1	0	9	1	10	11	5	0	6.5
2012-01-09	Jan	summer 11 - 12	P03	Eskom	light	Oct late	present	9	6a	2	5	0	2	0	9	1	15	14	16	7	13
2012-01-09	Jan	summer 11 - 12	P03	Eskom	light	Oct late	present	9	6b	0	8	1	0	0	9	1	13	18	9	7	11.75
2012-01-09	Jan	summer 11 - 12	P03	Eskom	light	Oct late	present	9	7a	1	7	0	1	0	9	1	10	6	9	9	8.5
2012-01-09	Jan	summer 11 - 12	P03	Eskom	light	Oct late	present	9	7b	0	8	0	1	0	9	1	11	14	10	7	10.5
2012-01-09	Jan	summer 11 - 12	P03	Eskom	light	Oct late	present	9	8a	2	6	0	1	0	9	1	9	7	14	12	10.5
2012-01-09	Jan	summer 11 - 12	P03	Eskom	light	Oct late	present	9	8b	1	6	0	2	0	9	1	13	8	11	5	9.25
2012-01-09	Jan	summer 11 - 12	P03	Eskom	light	Oct late	present	9	9a	0	9	0	0	0	9	1	11	10	10	6	9.25
2012-01-09	Jan	summer 11 - 12	P03	Eskom	light	Oct late	present	9	9b	3	5	0	1	0	9	1	0	5	0	0	1.25
2012-01-09	Jan	summer 11 - 12	P03	Eskom	light	Oct late	present	9	10a	2	2	0	5	0	9	1	7	0	0	0	1.75
2012-01-09	Jan	summer 11 - 12	P03	Eskom	light	Oct late	present	9	10b	2	7	0	0	0	9	1	11	4	3	9	6.75
2012-01-10	Jan	summer 11 - 12	P03A	Private	heavy	Sept early	absent	8	1a	2	4	0	3	0	9	1	5	7	5	4	5.25
2012-01-10	Jan	summer 11 - 12	P03A	Private	heavy	Sept early	absent	8	1b	1	4	2	2	0	9	1	0	7	6	10	5.75
2012-01-10	Jan	summer 11 - 12	P03A	Private	heavy	Sept early	absent	8	2a	2	5	0	2	0	9	1	8	8	0	7	5.75
2012-01-10	Jan	summer 11 - 12	P03A	Private	heavy	Sept early	absent	8	2b	3	4	0	2	0	9	1	9	7	6	6	7
2012-01-10	Jan	summer 11 - 12	P03A	Private	heavy	Sept early	absent	8	3a	5	4	0	0	0	9	1	7	9	0	0	4
2012-01-10	Jan	summer 11 - 12	P03A	Private	heavy	Sept early	absent	8	3b	1	6	0	2	0	9	1	11	7	7	0	6.25
2012-01-10	Jan	summer 11 - 12	P03A	Private	heavy	Sept early	absent	8	4a	0	3	0	6	0	9	1	9	0	0	0	2.25
2012-01-10	Jan	summer 11 - 12	P03A	Private	heavy	Sept early	absent	8	4b	2	4	3	0	0	9	1	3	5	6	0	3.5
2012-01-10	Jan	summer 11 - 12	P03A	Private	heavy	Sept early	absent	8	5a	2	3	1	3	0	9	1	6	7	4	2	4.75
2012-01-10	Jan	summer 11 - 12	P03A	Private	heavy	Sept early	absent	8	5b	3	6	0	0	0	9	1	7	10	0	10	6.75
2012-01-10	Jan	summer 11 - 12	P03A	Private	heavy	Sept early	absent	8	6a	5	2	2	0	0	9	1	0	0	0	0	0
2012-01-10	Jan	summer 11 - 12	P03A	Private	heavy	Sept early	absent	8	6b	2	4	0	3	0	9	1	11	5	0	10	6.5
2012-01-10	Jan	summer 11 - 12	P03A	Private	heavy	Sept early	absent	8	7a	0	5	0	4	0	9	1	13	7	10	9	9.75
2012-01-10	Jan	summer 11 - 12	P03A	Private	heavy	Sept early	absent	8	7b	0	4	2	3	0	9	1	12	11	13	0	9
2012-01-10	Jan	summer 11 - 12	P03A	Private	heavy	Sept early	absent	8	8a	1	7	0	1	0	9	1	14	9	7	4	8.5
2012-01-10	Jan	summer 11 - 12	P03A	Private	heavy	Sept early	absent	8	8b	2	5	2	0	0	9	1	13	9	11	7	10
2012-01-10	Jan	summer 11 - 12	P03A	Private	heavy	Sept early	absent	8	9a	4	2	0	3	0	9	1	9	10	13	14	11.5
2012-01-10	Jan	summer 11 - 12	P03A	Private	heavy	Sept early	absent	8	9b	5	4	0	0	0	9	1	10	10	4	9	8.25
2012-01-10	Jan	summer 11 - 12	P03A	Private	heavy	Sept early	absent	8	10a	1	6	0	2	0	9	1	8	4	7	6	6.25
2012-01-10	Jan	summer 11 - 12	P03A	Private	heavy	Sept early	absent	8	10b	1	8	0	0	0	9	1	5	6	9	0	5
2012-01-11	Jan	summer 11 - 12	P07	Eskom	heavy	Oct early	present	8	1a	3	4	0	2	0	9	1	0	0	6	6	3
2012-01-11	Jan	summer 11 - 12	P07	Eskom	heavy	Oct early	present	8	1b	2	4	1	2	0	9	1	6	14	7	0	6.75
2012-01-11	Jan	summer 11 - 12	P07	Eskom	heavy	Oct early	present	8	2a	2	6	1	0	0	9	1	16	6	0	5	6.75
2012-01-11	Jan	summer 11 - 12	P07	Eskom	heavy	Oct early	present	8	2b	0	2	3	4	0	9	1	11	0	0	0	2.75
2012-01-11	Jan	summer 11 - 12	P07	Eskom	heavy	Oct early	present	8	3a	2	5	0	2	0	9	1	8	7	0	0	3.75
2012-01-11	Jan	summer 11 - 12	P07	Eskom	heavy	Oct early	present	8	3b	1	7	1	0	0	9	1	5	6	8	4	5.75
2012-01-11	Jan	summer 11 - 12	P07	Eskom	heavy	Oct early	present	8	4a	1	4	0	4	0	9	1	10	6	9	0	6.25
2012-01-11	Jan	summer 11 - 12	P07	Eskom	heavy	Oct early	present	8	4b	2	4	0	3	0	9	1	0	8	10	8	6.5
2012-01-11	Jan	summer 11 - 12	P07	Eskom	heavy	Oct early	present	8	5a	2	7	0	0	0	9	1	16	10	12	10	12
2012-01-11	Jan	summer 11 - 12	P07	Eskom	heavy	Oct early	present	8	5b	0	8	0	1	0	9	1	0	9	13	11	8.25
2012-01-11	Jan	summer 11 - 12	P07	Eskom	heavy	Oct early	present	8	6a	1	6	0	2	0	9	1	5	8	10	7	7.5
2012-01-11	Jan	summer 11 - 12	P07	Eskom	heavy	Oct early	present	8	6b	3	5	0	1	0	9	1	13	4	9	0	6.5
2012-01-11	Jan	summer 11 - 12	P07	Eskom	heavy	Oct early	present	8	7a	2	3	2	2	0	9	1	10	0	15	10	8.75
2012-01-11	Jan	summer 11 - 12	P07	Eskom	heavy	Oct early	present	8	7b	0	6	2	1	0	9	1	0	15	11	10	9
2012-01-11	Jan	summer 11 - 12	P07	Eskom	heavy	Oct early	present	8	8a	4	5	0	0	0	9	1	16	12	0	0	7
2012-01-11	Jan	summer 11 - 12	P07	Eskom	heavy	Oct early	present	8	8b	0	6	1	2	0	9	1	13	11	17	5	11.5
2012-01-11	Jan	summer 11 - 12	P07	Eskom	heavy	Oct early	present	8	9a	3	2	0	4	0	9	1	9	0	0	0	2.25
2012-01-11	Jan	summer 11 - 12	P07	Eskom	heavy	Oct early	present	8	9b	2	3	2	2	0	9	1	12	10	0	4	6.5
2012-01-11	Jan	summer 11 - 12	P07	Eskom	heavy	Oct early	present	8	10a	3	3	0	3	0	9	1	10	0	8	12	7.5
2012-01-11	Jan	summer 11 - 12	P07	Eskom	heavy	Oct early	present	8	10b	1	6	0	2	0	9	1	6	7	7	5	6.25
2012-01-11	Jan	summer 11 - 12	P38	Eskom	none	Oct mid	present	14	1a	3	5	0	1	0	9	1	10	11	9	12	10.5
2012-01-11	Jan	summer 11 - 12	P38	Eskom	none	Oct mid	present	14	1b	2	3	4	0	0	9	1	0	11	38	32	20.25
2012-01-11	Jan	summer 11 - 12	P38	Eskom	none	Oct mid	present	14	2a	4	5	0	0	0	9	1	11	9	11	10	10.25
2012-01-11	Jan	summer 11 - 12	P38	Eskom	none	Oct mid	present	14	2b	1	6	0	2	0	9	1	8	9	17	6	10
2012-01-11	Jan	summer 11 - 12	P38	Eskom	none	Oct mid	present	14	3a	2	4	0	3	0	9	1	5	0	0	12	4.25
2012-01-11	Jan	summer 11 - 12	P38	Eskom	none	Oct mid	present	14	3b	2	7	0	0	0	9	1	9	12	20	23	16
2012-01-11	Jan	summer 11 - 12	P38	Eskom	none	Oct mid	present	14	4a	2	5	0	2	0	9	1	9	8	14	10	10.25
2012-01-11	Jan	summer 11 - 12	P38	Eskom	none	Oct mid	present	14	4b	0	6	0	3	0	9	1	13	7	8	6	8.5
2012-01-11	Jan	summer 11 - 12	P38	Eskom	none	Oct mid	present	14	5a	1	3	3	2	0	9	1	26	12	29	9	19
2012-01-11	Jan	summer 11 - 12	P38	Eskom	none	Oct mid	present	14	5b	2	6	0	1	0	9	1	8	22	15	18	15.75
2012-01-11	Jan	summer 11 - 12	P38	Eskom	none	Oct mid	present	14	6a	4	5	0	0	0	9	1	26	25	30	26	26.75
2012-01-11	Jan	summer 11 - 12	P38	Eskom	none	Oct mid	present	14	6b	3	4	0	2	0	9	1	41	27	29	25	30.5
2012-01-11	Jan	summer 11 - 12	P38	Eskom	none	Oct mid	present	14	7a	0	7	0	2	0	9	1	16	9	8	0	8.25
2012-01-11	Jan	summer 11 - 12	P38	Eskom	none	Oct mid	present	14	7b	0	9	0	0	0	9	1	10	10	23	13	14
2012-01-11	Jan	summer 11 - 12	P38	Eskom	none	Oct mid	present	14	8a	5	2	0	2	0	9	1	10	8	0	0	4.5
2012-01-11	Jan	summer 11 - 12	P38	Eskom	none	Oct mid	present	14	8b	4	4	0	1	0	9	1	12	10	8	0	7.5
2012-01-11	Jan	summer 11 - 12	P38	Eskom	none	Oct mid	present	14	9a	3	5	1	0	0	9	1	17	12	14	14	14.25
2012-01-11	Jan	summer 11 - 12	P38	Eskom	none	Oct mid	present	14	9b	0	6	2	1	0	9	1	13	10	12	8	10.75
2012-01-11	Jan	summer 11 - 12	P38	Eskom	none	Oct mid	present	14	10a	0	5	0	4	0	9	1	10	10	15	6	10.25
2012-01-11	Jan	summer 11 - 12	P38	Eskom	none	Oct mid	present	14	10b	0	2	7	0	0	9	1	32	14	11	28	21.25
2012-01-11	Jan	summer 11 - 12	P40	Eskom	light	Aug late	present	7	1a	0	8	0	1	0	9	1	8	10	10	0	7
2012-01-11	Jan	summer 11 - 12	P40	Eskom	light	Aug late	present	7	1b	1	6	0	2	0	9	1	15	13	10	10	12
2012-01-11	Jan	summer 11 - 12	P40	Eskom	light	Aug late	present	7	2a	1	7	0	1	0	9	1	7	3	5	8	5.75
2012-01-11	Jan	summer 11 - 12	P40	Eskom	light	Aug late	present	7	2b	0	9	0	0	0	9	1	5	9	3	7	6
2012-01-11	Jan	summer 11 - 12	P40	Eskom	light	Aug late	present	7	3a	2	6	0	1	0	9	1	8	6	13	10	9.25
2012-01-11	Jan	summer 11 - 12	P40	Eskom	light	Aug late	present	7	3b	1	7	1	0	0	9	1	13	9	11	11	11
2012-01-11	Jan	summer 11 - 12	P40	Eskom	light	Aug late	present	7	4a	2	5	0	2	0	9	1	7	9	5	9	7.5
2012-01-11	Jan	summer 11 - 12	P40	Eskom	light	Aug late	present	7	4b	3	4	2	0	0	9	1	0	0	9	15	6
2012-01-11	Jan	summer 11 - 12	P40	Eskom	light	Aug late	present	7	5a	1	5	0	3	0	9	1	5	3	6	2	4
2012-01-11	Jan	summer 11 - 12	P40	Eskom	light	Aug late	present	7	5b	0	8	0	1	0	9	1	20	15	12	36	20.75
2012-01-11	Jan	summer 11 - 12	P40	Eskom	light	Aug late	present	7	6a	0	6	0	3	0	9	1	14	13	7	0	8.5
2012-01-11	Jan	summer 11 - 12	P40	Eskom	light	Aug late	present	7	6b	2	7	0	0	0	9	1	15	14	10	6	11.25
2012-01-11	Jan	summer 11 - 12	P40	Eskom	light	Aug late	present	7	7a	1	8	0	0	0	9	1	6	10	9	5	7.5
2012-01-11	Jan	summer 11 - 12	P40	Eskom	light	Aug late	present	7	7b	2	4	0	3	0	9	1	14	8	10	6	9.5
2012-01-11	Jan	summer 11 - 12	P40	Eskom	light	Aug late	present	7	8a	1	6	0	2	0	9	1	11	21	13	16	15.25
2012-01-11	Jan	summer 11 - 12	P40	Eskom	light	Aug late	present	7	8b	2	7	0	0	0	9	1	14	12	18	5	12.25
2012-01-11	Jan	summer 11 - 12	P40	Eskom	light	Aug late	present	7	9a	0	6	0	3	0	9	1	10	9	12	18	12.25
2012-01-11	Jan	summer 11 - 12	P40	Eskom	light	Aug late	present	7	9b	4	2	3	0	0	9	1	9	11	0	0	5
2012-01-11	Jan	summer 11 - 12	P40	Eskom	light	Aug late	present	7	10a	2	7	0	0	0	9	1	10	9	10	12	10.25
2012-01-11	Jan	summer 11 - 12	P40	Eskom	light	Aug late	present	7	10b	3	4	2	0	0	9	1	14	12	18	5	12.25
2012-01-12	Jan	summer 11 - 12	P39	Eskom	none	Aug late	present	8	1a	2	6	0	1	0	9	1	14	10	14	0	9.5
2012-01-12	Jan	summer 11 - 12	P39	Eskom	none	Aug late	present	8	1b	2	7	0	0	0	9	1	9	0	13	13	8.75
2012-01-12	Jan	summer 11 - 12	P39	Eskom	none	Aug late	present	8	2a	0	9	0	0	0	9	1	7	11	12	8	9.5
2012-01-12	Jan	summer 11 - 12	P39	Eskom	none	Aug late	present	8	2b	1	8	0	0	0	9	1	12	10	16	8	11.5
2012-01-12	Jan	summer 11 - 12	P39	Eskom	none	Aug late	present	8	3a	2	7	0	0	0	9	1	17	12	20	12	15.25
2012-01-12	Jan	summer 11 - 12	P39	Eskom	none	Aug late	present	8	3b	0	9	0	0	0	9	1	15	16	16	17	16
2012-01-12	Jan	summer 11 - 12	P39	Eskom	none	Aug late	present	8	4a	1	8	0	0	0	9	1	8	13	10	0	7.75
2012-01-12	Jan	summer 11 - 12	P39	Eskom	none	Aug late	present	8	4b	0	8	1	0	0	9	1	9	6	7	11	8.25
2012-01-12	Jan	summer 11 - 12	P39	Eskom	none	Aug late	present	8	5a	3	6	0	0	0	9	1	9	8	7	0	6
2012-01-12	Jan	summer 11 - 12	P39	Eskom	none	Aug late	present	8	5b	1	8	0	0	0	9	1	17	10	26	13	16.5
2012-01-12	Jan	summer 11 - 12	P39	Eskom	none	Aug late	present	8	6a	0	8	0	1	0	9	1	16	10	8	6	10
2012-01-12	Jan	summer 11 - 12	P39	Eskom	none	Aug late	present	8	6b	2	6	0	1	0	9	1	17	14	15	10	14
2012-01-12	Jan	summer 11 - 12	P39	Eskom	none	Aug late	present	8	7a	3	6	0	0	0	9	1	9	12	0	10	7.75
2012-01-12	Jan	summer 11 - 12	P39	Eskom	none	Aug late	present	8	7b	3	6	0	0	0	9	1	13	14	15	14	14
2012-01-12	Jan	summer 11 - 12	P39	Eskom	none	Aug late	present	8	8a	1	7	1	0	0	9	1	10	0	13	15	9.5
2012-01-12	Jan	summer 11 - 12	P39	Eskom	none	Aug late	present	8	8b	4	4	1	0	0	9	1	15	12	0	0	6.75
2012-01-12	Jan	summer 11 - 12	P39	Eskom	none	Aug late	present	8	9a	0	9	0	0	0	9	1	20	16	15	15	16.5
2012-01-12	Jan	summer 11 - 12	P39	Eskom	none	Aug late	present	8	9b	1	6	1	1	0	9	1	15	8	10	5	9.5
2012-01-12	Jan	summer 11 - 12	P39	Eskom	none	Aug late	present	8	10a	1	7	0	1	0	9	1	24	15	14	14	16.75
2012-01-12	Jan	summer 11 - 12	P39	Eskom	none	Aug late	present	8	10b	0	9	0	0	0	9	1	20	10	14	15	14.75
2012-01-12	Jan	summer 11 - 12	P41	Eskom	none	Aug late	present	5	1a	0	9	0	0	0	9	1	20	12	9	15	14
2012-01-12	Jan	summer 11 - 12	P41	Eskom	none	Aug late	present	5	1b	2	7	0	0	0	9	1	15	20	7	17	14.75
2012-01-12	Jan	summer 11 - 12	P41	Eskom	none	Aug late	present	5	2a	1	8	0	0	0	9	1	9	8	14	5	9
2012-01-12	Jan	summer 11 - 12	P41	Eskom	none	Aug late	present	5	2b	0	9	0	0	0	9	1	12	10	8	10	10
2012-01-12	Jan	summer 11 - 12	P41	Eskom	none	Aug late	present	5	3a	3	6	0	0	0	9	1	26	24	17	11	19.5
2012-01-12	Jan	summer 11 - 12	P41	Eskom	none	Aug late	present	5	3b	2	6	0	1	0	9	1	15	0	20	0	8.75
2012-01-12	Jan	summer 11 - 12	P41	Eskom	none	Aug late	present	5	4a	1	7	1	0	0	9	1	30	24	15	24	23.25
2012-01-12	Jan	summer 11 - 12	P41	Eskom	none	Aug late	present	5	4b	3	6	0	0	0	9	1	9	10	19	6	11
2012-01-12	Jan	summer 11 - 12	P41	Eskom	none	Aug late	present	5	5a	0	9	0	0	0	9	1	32	38	22	40	33
2012-01-12	Jan	summer 11 - 12	P41	Eskom	none	Aug late	present	5	5b	0	6	1	2	0	9	1	27	7	20	12	16.5
2012-01-12	Jan	summer 11 - 12	P41	Eskom	none	Aug late	present	5	6a	1	8	0	0	0	9	1	16	8	13	0	9.25
2012-01-12	Jan	summer 11 - 12	P41	Eskom	none	Aug late	present	5	6b	0	9	0	0	0	9	1	12	8	8	8	9
2012-01-12	Jan	summer 11 - 12	P41	Eskom	none	Aug late	present	5	7a	0	9	0	0	0	9	1	12	11	10	7	10
2012-01-12	Jan	summer 11 - 12	P41	Eskom	none	Aug late	present	5	7b	4	5	0	0	0	9	1	10	8	8	6	8
2012-01-12	Jan	summer 11 - 12	P41	Eskom	none	Aug late	present	5	8a	1	8	0	0	0	9	1	34	22	22	24	25.5
2012-01-12	Jan	summer 11 - 12	P41	Eskom	none	Aug late	present	5	8b	2	7	0	0	0	9	1	20	14	18	16	17
2012-01-12	Jan	summer 11 - 12	P41	Eskom	none	Aug late	present	5	9a	3	5	1	0	0	9	1	14	8	5	7	8.5
2012-01-12	Jan	summer 11 - 12	P41	Eskom	none	Aug late	present	5	9b	1	8	0	0	0	9	1	5	10	6	8	7.25
2012-01-12	Jan	summer 11 - 12	P41	Eskom	none	Aug late	present	5	10a	4	5	0	0	0	9	1	16	0	5	10	7.75
2012-01-12	Jan	summer 11 - 12	P41	Eskom	none	Aug late	present	5	10b	6	3	0	0	0	9	1	20	17	0	0	9.25
2012-01-14	Jan	summer 11 - 12	P42	Eskom	none	Oct late	absent	4	1a	0	2	4	3	0	9	1	10	5	0	0	3.75
2012-01-14	Jan	summer 11 - 12	P42	Eskom	none	Oct late	absent	4	1b	0	5	2	2	0	9	1	6	13	10	9	9.5
2012-01-14	Jan	summer 11 - 12	P42	Eskom	none	Oct late	absent	4	2a	2	4	0	3	0	9	1	11	9	8	12	10
2012-01-14	Jan	summer 11 - 12	P42	Eskom	none	Oct late	absent	4	2b	5	4	0	0	0	9	1	15	0	8	10	8.25
2012-01-14	Jan	summer 11 - 12	P42	Eskom	none	Oct late	absent	4	3a	0	9	0	0	0	9	1	19	23	14	18	18.5
2012-01-14	Jan	summer 11 - 12	P42	Eskom	none	Oct late	absent	4	3b	3	6	0	0	0	9	1	9	13	8	17	11.75
2012-01-14	Jan	summer 11 - 12	P42	Eskom	none	Oct late	absent	4	4a	0	5	2	2	0	9	1	12	20	10	0	10.5
2012-01-14	Jan	summer 11 - 12	P42	Eskom	none	Oct late	absent	4	4b	2	4	0	3	0	9	1	0	8	13	15	9
2012-01-14	Jan	summer 11 - 12	P42	Eskom	none	Oct late	absent	4	5a	2	4	1	2	0	9	1	6	8	4	0	4.5
2012-01-14	Jan	summer 11 - 12	P42	Eskom	none	Oct late	absent	4	5b	4	5	0	0	0	9	1	0	0	13	10	5.75
2012-01-14	Jan	summer 11 - 12	P42	Eskom	none	Oct late	absent	4	6a	3	3	0	3	0	9	1	14	12	0	0	6.5
2012-01-14	Jan	summer 11 - 12	P42	Eskom	none	Oct late	absent	4	6b	3	6	0	0	0	9	1	9	7	10	7	8.25
2012-01-14	Jan	summer 11 - 12	P42	Eskom	none	Oct late	absent	4	7a	0	4	0	5	0	9	1	8	10	0	0	4.5
2012-01-14	Jan	summer 11 - 12	P42	Eskom	none	Oct late	absent	4	7b	4	2	3	0	0	9	1	12	15	0	8	8.75
2012-01-14	Jan	summer 11 - 12	P42	Eskom	none	Oct late	absent	4	8a	0	7	2	0	0	9	1	14	14	16	11	13.75
2012-01-14	Jan	summer 11 - 12	P42	Eskom	none	Oct late	absent	4	8b	0	9	0	0	0	9	1	15	16	10	11	13
2012-01-14	Jan	summer 11 - 12	P42	Eskom	none	Oct late	absent	4	9a	1	8	0	0	0	9	1	12	5	8	10	8.75
2012-01-14	Jan	summer 11 - 12	P42	Eskom	none	Oct late	absent	4	9b	0	7	2	0	0	9	1	11	13	13	12	12.25
2012-01-14	Jan	summer 11 - 12	P42	Eskom	none	Oct late	absent	4	10a	4	4	0	1	0	9	1	14	12	11	9	11.5
2012-01-14	Jan	summer 11 - 12	P42	Eskom	none	Oct late	absent	4	10b	3	4	0	2	0	9	1	12	15	0	10	9.25
2012-01-16	Jan	summer 11 - 12	P63	Private	heavy	Oct late	absent	14	1a	3	5	0	1	0	9	1	16	0	13	4	8.25
2012-01-16	Jan	summer 11 - 12	P63	Private	heavy	Oct late	absent	14	1b	1	8	0	0	0	9	1	16	13	10	5	11
2012-01-16	Jan	summer 11 - 12	P63	Private	heavy	Oct late	absent	14	2a	0	5	1	3	0	9	1	6	6	9	4	6.25
2012-01-16	Jan	summer 11 - 12	P63	Private	heavy	Oct late	absent	14	2b	1	7	0	1	0	9	1	5	15	5	8	8.25
2012-01-16	Jan	summer 11 - 12	P63	Private	heavy	Oct late	absent	14	3a	2	7	0	0	0	9	1	2	4	4	8	4.5
2012-01-16	Jan	summer 11 - 12	P63	Private	heavy	Oct late	absent	14	3b	1	6	1	1	0	9	1	9	4	6	4	5.75
2012-01-16	Jan	summer 11 - 12	P63	Private	heavy	Oct late	absent	14	4a	4	5	0	0	0	9	1	3	0	6	3	3
2012-01-16	Jan	summer 11 - 12	P63	Private	heavy	Oct late	absent	14	4b	0	7	1	1	0	9	1	5	5	3	9	5.5
2012-01-16	Jan	summer 11 - 12	P63	Private	heavy	Oct late	absent	14	5a	1	5	0	3	0	9	1	6	0	5	4	3.75
2012-01-16	Jan	summer 11 - 12	P63	Private	heavy	Oct late	absent	14	5b	1	7	0	1	0	9	1	8	5	3	3	4.75
2012-01-16	Jan	summer 11 - 12	P63	Private	heavy	Oct late	absent	14	6a	0	7	0	2	0	9	1	7	9	0	6	5.5
2012-01-16	Jan	summer 11 - 12	P63	Private	heavy	Oct late	absent	14	6b	3	2	4	0	0	9	1	6	6	21	8	10.25
2012-01-16	Jan	summer 11 - 12	P63	Private	heavy	Oct late	absent	14	7a	0	6	1	2	0	9	1	5	7	5	8	6.25
2012-01-16	Jan	summer 11 - 12	P63	Private	heavy	Oct late	absent	14	7b	1	8	0	0	0	9	1	6	7	4	6	5.75
2012-01-16	Jan	summer 11 - 12	P63	Private	heavy	Oct late	absent	14	8a	0	9	0	0	0	9	1	11	8	10	7	9
2012-01-16	Jan	summer 11 - 12	P63	Private	heavy	Oct late	absent	14	8b	0	9	0	0	0	9	1	13	11	11	10	11.25
2012-01-16	Jan	summer 11 - 12	P63	Private	heavy	Oct late	absent	14	9a	0	7	0	2	0	9	1	5	11	8	4	7
2012-01-16	Jan	summer 11 - 12	P63	Private	heavy	Oct late	absent	14	9b	1	6	1	1	0	9	1	8	7	17	0	8
2012-01-16	Jan	summer 11 - 12	P63	Private	heavy	Oct late	absent	14	10a	2	7	0	0	0	9	1	5	6	6	9	6.5
2012-01-16	Jan	summer 11 - 12	P63	Private	heavy	Oct late	absent	14	10b	0	5	3	1	0	9	1	11	9	0	10	7.5
2012-01-16	Jan	summer 11 - 12	P64	Private	heavy	Oct late	absent	7	1a	0	7	0	2	0	9	1	12	8	11	0	7.75
2012-01-16	Jan	summer 11 - 12	P64	Private	heavy	Oct late	absent	7	1b	3	6	0	0	0	9	1	5	9	13	8	8.75
2012-01-16	Jan	summer 11 - 12	P64	Private	heavy	Oct late	absent	7	2a	3	6	0	0	0	9	1	12	9	8	12	10.25
2012-01-16	Jan	summer 11 - 12	P64	Private	heavy	Oct late	absent	7	2b	0	5	1	3	0	9	1	10	9	10	10	9.75
2012-01-16	Jan	summer 11 - 12	P64	Private	heavy	Oct late	absent	7	3a	0	2	7	0	0	9	1	27	18	21	10	19
2012-01-16	Jan	summer 11 - 12	P64	Private	heavy	Oct late	absent	7	3b	2	6	0	1	0	9	1	13	9	13	10	11.25
2012-01-16	Jan	summer 11 - 12	P64	Private	heavy	Oct late	absent	7	4a	5	4	0	0	0	9	1	3	10	0	0	3.25
2012-01-16	Jan	summer 11 - 12	P64	Private	heavy	Oct late	absent	7	4b	2	5	0	2	0	9	1	9	0	0	4	3.25
2012-01-16	Jan	summer 11 - 12	P64	Private	heavy	Oct late	absent	7	5a	5	2	0	2	0	9	1	10	5	0	0	3.75
2012-01-16	Jan	summer 11 - 12	P64	Private	heavy	Oct late	absent	7	5b	1	5	1	2	0	9	1	10	16	10	0	9
2012-01-16	Jan	summer 11 - 12	P64	Private	heavy	Oct late	absent	7	6a	2	6	0	1	0	9	1	8	14	6	0	7
2012-01-16	Jan	summer 11 - 12	P64	Private	heavy	Oct late	absent	7	6b	0	7	0	2	0	9	1	14	10	5	0	7.25
2012-01-16	Jan	summer 11 - 12	P64	Private	heavy	Oct late	absent	7	7a	2	6	0	1	0	9	1	14	10	8	8	10
2012-01-16	Jan	summer 11 - 12	P64	Private	heavy	Oct late	absent	7	7b	5	4	0	0	0	9	1	10	6	11	0	6.75
2012-01-16	Jan	summer 11 - 12	P64	Private	heavy	Oct late	absent	7	8a	2	7	0	0	0	9	1	5	10	12	8	8.75
2012-01-16	Jan	summer 11 - 12	P64	Private	heavy	Oct late	absent	7	8b	6	3	0	0	0	9	1	10	20	21	0	12.75
2012-01-16	Jan	summer 11 - 12	P64	Private	heavy	Oct late	absent	7	9a	0	6	0	3	0	9	1	10	14	15	7	11.5
2012-01-16	Jan	summer 11 - 12	P64	Private	heavy	Oct late	absent	7	9b	1	7	0	1	0	9	1	10	16	0	5	7.75
2012-01-16	Jan	summer 11 - 12	P64	Private	heavy	Oct late	absent	7	10a	1	8	0	0	0	9	1	6	6	10	4	6.5
2012-01-16	Jan	summer 11 - 12	P64	Private	heavy	Oct late	absent	7	10b	0	5	2	2	0	9	1	6	7	7	5	6.25
2012-01-16	Jan	summer 11 - 12	P65	Eskom	none	Oct late	absent	6	1a	0	6	1	2	0	9	1	14	7	5	8	8.5
2012-01-16	Jan	summer 11 - 12	P65	Eskom	none	Oct late	absent	7	1b	2	7	0	0	0	9	1	10	7	8	6	7.75
2012-01-16	Jan	summer 11 - 12	P65	Eskom	none	Oct late	absent	8	2a	0	8	1	0	0	9	1	16	9	12	14	12.75
2012-01-16	Jan	summer 11 - 12	P65	Eskom	none	Oct late	absent	9	2b	2	6	0	1	0	9	1	12	9	18	5	11
2012-01-16	Jan	summer 11 - 12	P65	Eskom	none	Oct late	absent	10	3a	3	6	0	0	0	9	1	11	0	5	5	5.25
2012-01-16	Jan	summer 11 - 12	P65	Eskom	none	Oct late	absent	11	3b	0	7	0	2	0	9	1	9	4	14	3	7.5
2012-01-16	Jan	summer 11 - 12	P65	Eskom	none	Oct late	absent	12	4a	0	2	0	7	0	9	1	14	0	0	0	3.5
2012-01-16	Jan	summer 11 - 12	P65	Eskom	none	Oct late	absent	13	4b	2	5	0	2	0	9	1	16	16	15	13	15
2012-01-16	Jan	summer 11 - 12	P65	Eskom	none	Oct late	absent	14	5a	0	5	0	4	0	9	1	30	0	0	20	12.5
2012-01-16	Jan	summer 11 - 12	P65	Eskom	none	Oct late	absent	15	5b	3	6	0	0	0	9	1	6	10	0	5	5.25
2012-01-16	Jan	summer 11 - 12	P65	Eskom	none	Oct late	absent	16	6a	2	4	1	2	0	9	1	12	13	9	0	8.5
2012-01-16	Jan	summer 11 - 12	P65	Eskom	none	Oct late	absent	17	6b	2	6	0	1	0	9	1	9	5	10	10	8.5
2012-01-16	Jan	summer 11 - 12	P65	Eskom	none	Oct late	absent	18	7a	6	3	0	0	0	9	1	12	0	0	0	3
2012-01-16	Jan	summer 11 - 12	P65	Eskom	none	Oct late	absent	19	7b	5	4	0	0	0	9	1	10	8	0	0	4.5
2012-01-16	Jan	summer 11 - 12	P65	Eskom	none	Oct late	absent	20	8a	2	7	0	0	0	9	1	11	20	14	13	14.5
2012-01-16	Jan	summer 11 - 12	P65	Eskom	none	Oct late	absent	21	8b	3	6	0	0	0	9	1	18	15	19	20	18
2012-01-16	Jan	summer 11 - 12	P65	Eskom	none	Oct late	absent	22	9a	1	5	0	3	0	9	1	12	13	8	0	8.25
2012-01-16	Jan	summer 11 - 12	P65	Eskom	none	Oct late	absent	23	9b	0	3	2	4	0	9	1	34	20	0	0	13.5
2012-01-16	Jan	summer 11 - 12	P65	Eskom	none	Oct late	absent	24	10a	1	8	0	0	0	9	1	20	10	10	15	13.75
2012-01-16	Jan	summer 11 - 12	P65	Eskom	none	Oct late	absent	25	10b	3	6	0	0	0	9	1	16	22	18	0	14
2012-01-16	Jan	summer 11 - 12	P66	Eskom	none	Nov early	absent	4	1a	3	3	0	3	0	9	1	0	10	0	12	5.5
2012-01-16	Jan	summer 11 - 12	P66	Eskom	none	Nov early	absent	4	1b	0	6	0	3	0	9	1	7	6	12	10	8.75
2012-01-16	Jan	summer 11 - 12	P66	Eskom	none	Nov early	absent	4	2a	0	7	0	2	0	9	1	18	20	14	18	17.5
2012-01-16	Jan	summer 11 - 12	P66	Eskom	none	Nov early	absent	4	2b	1	6	2	0	0	9	1	17	14	15	11	14.25
2012-01-16	Jan	summer 11 - 12	P66	Eskom	none	Nov early	absent	4	3a	1	5	0	3	0	9	1	10	12	11	10	10.75
2012-01-16	Jan	summer 11 - 12	P66	Eskom	none	Nov early	absent	4	3b	0	8	1	0	0	9	1	6	5	6	12	7.25
2012-01-16	Jan	summer 11 - 12	P66	Eskom	none	Nov early	absent	4	4a	2	7	0	0	0	9	1	7	9	6	8	7.5
2012-01-16	Jan	summer 11 - 12	P66	Eskom	none	Nov early	absent	4	4b	3	5	1	0	0	9	1	6	22	7	7	10.5
2012-01-16	Jan	summer 11 - 12	P66	Eskom	none	Nov early	absent	4	5a	2	6	0	1	0	9	1	9	7	14	12	10.5
2012-01-16	Jan	summer 11 - 12	P66	Eskom	none	Nov early	absent	4	5b	1	4	0	4	0	9	1	3	8	9	8	7
2012-01-16	Jan	summer 11 - 12	P66	Eskom	none	Nov early	absent	4	6a	0	9	0	0	0	9	1	0	0	0	0	0
2012-01-16	Jan	summer 11 - 12	P66	Eskom	none	Nov early	absent	4	6b	1	7	1	0	0	9	1	16	4	10	5	8.75
2012-01-16	Jan	summer 11 - 12	P66	Eskom	none	Nov early	absent	4	7a	3	5	0	1	0	9	1	15	22	17	13	16.75
2012-01-16	Jan	summer 11 - 12	P66	Eskom	none	Nov early	absent	4	7b	3	4	0	2	0	9	1	10	8	16	18	13
2012-01-16	Jan	summer 11 - 12	P66	Eskom	none	Nov early	absent	4	8a	0	7	0	2	0	9	1	35	0	7	8	12.5
2012-01-16	Jan	summer 11 - 12	P66	Eskom	none	Nov early	absent	4	8b	1	5	0	3	0	9	1	9	5	8	15	9.25
2012-01-16	Jan	summer 11 - 12	P66	Eskom	none	Nov early	absent	4	9a	0	7	0	2	0	9	1	7	11	5	2	6.25
2012-01-16	Jan	summer 11 - 12	P66	Eskom	none	Nov early	absent	4	9b	1	8	0	0	0	9	1	11	9	5	7	8
2012-01-16	Jan	summer 11 - 12	P66	Eskom	none	Nov early	absent	4	10a	2	5	2	0	0	9	1	8	6	11	7	8
2012-01-16	Jan	summer 11 - 12	P66	Eskom	none	Nov early	absent	4	10b	3	4	0	2	0	9	1	9	6	8	8	7.75
2012-01-18	Jan	summer 11 - 12	P70	Eskom	none	not burned	present	4	1a	0	9	0	0	0	9	1	46	41	29	40	39
2012-01-18	Jan	summer 11 - 12	P70	Eskom	none	not burned	present	4	1b	0	9	0	0	0	9	1	42	44	42	40	42
2012-01-18	Jan	summer 11 - 12	P70	Eskom	none	not burned	present	4	2a	0	9	0	0	0	9	1	35	40	36	37	37
2012-01-18	Jan	summer 11 - 12	P70	Eskom	none	not burned	present	4	2b	0	9	0	0	0	9	1	30	39	36	41	36.5
2012-01-18	Jan	summer 11 - 12	P70	Eskom	none	not burned	present	4	3a	0	8	0	1	0	9	1	47	44	41	47	44.75
2012-01-18	Jan	summer 11 - 12	P70	Eskom	none	not burned	present	4	3b	0	9	0	0	0	9	1	42	41	39	43	41.25
2012-01-18	Jan	summer 11 - 12	P70	Eskom	none	not burned	present	4	4a	0	7	0	2	0	9	1	41	41	42	42	41.5
2012-01-18	Jan	summer 11 - 12	P70	Eskom	none	not burned	present	4	4b	2	7	0	0	0	9	1	46	46	45	45	45.5
2012-01-18	Jan	summer 11 - 12	P70	Eskom	none	not burned	present	4	5a	2	7	0	0	0	9	1	41	46	41	42	42.5
2012-01-18	Jan	summer 11 - 12	P70	Eskom	none	not burned	present	4	5b	0	9	0	0	0	9	1	42	41	39	38	40
2012-01-18	Jan	summer 11 - 12	P70	Eskom	none	not burned	present	4	6a	0	7	2	0	0	9	1	38	37	39	29	35.75
2012-01-18	Jan	summer 11 - 12	P70	Eskom	none	not burned	present	4	6b	1	8	0	0	0	9	1	42	44	43	41	42.5
2012-01-18	Jan	summer 11 - 12	P70	Eskom	none	not burned	present	4	7a	0	9	0	0	0	9	1	37	38	37	37	37.25
2012-01-18	Jan	summer 11 - 12	P70	Eskom	none	not burned	present	4	7b	0	6	3	0	0	9	1	41	42	37	41	40.25
2012-01-18	Jan	summer 11 - 12	P70	Eskom	none	not burned	present	4	8a	0	9	0	0	0	9	1	35	36	33	39	35.75
2012-01-18	Jan	summer 11 - 12	P70	Eskom	none	not burned	present	4	8b	2	6	1	0	0	9	1	31	35	39	40	36.25
2012-01-18	Jan	summer 11 - 12	P70	Eskom	none	not burned	present	4	9a	2	6	1	0	0	9	1	41	37	38	34	37.5
2012-01-18	Jan	summer 11 - 12	P70	Eskom	none	not burned	present	4	9b	1	5	3	0	0	9	1	34	32	31	33	32.5
2012-01-18	Jan	summer 11 - 12	P70	Eskom	none	not burned	present	4	10a	8	1	0	0	0	9	1	31	35	36	31	33.25
2012-01-18	Jan	summer 11 - 12	P70	Eskom	none	not burned	present	4	10b	0	8	1	0	0	9	1	33	33	36	31	33.25
2012-02-06	Feb	summer 11 - 12	P03A	Private	heavy	Sept early	absent	5	1a	1	6	0	2	0	9	1	14	9	0	8	7.75
2012-02-06	Feb	summer 11 - 12	P03A	Private	heavy	Sept early	absent	5	1b	2	4	1	2	0	9	1	11	7	6	0	6
2012-02-06	Feb	summer 11 - 12	P03A	Private	heavy	Sept early	absent	5	2a	7	2	0	0	0	9	1	7	0	0	0	1.75
2012-02-06	Feb	summer 11 - 12	P03A	Private	heavy	Sept early	absent	5	2b	0	6	0	3	0	9	1	10	9	8	8	8.75
2012-02-06	Feb	summer 11 - 12	P03A	Private	heavy	Sept early	absent	5	3a	2	6	0	1	0	9	1	7	8	14	12	10.25
2012-02-06	Feb	summer 11 - 12	P03A	Private	heavy	Sept early	absent	5	3b	0	6	3	0	0	9	1	13	9	5	7	8.5
2012-02-06	Feb	summer 11 - 12	P03A	Private	heavy	Sept early	absent	5	4a	5	4	0	0	0	9	1	7	11	0	0	4.5
2012-02-06	Feb	summer 11 - 12	P03A	Private	heavy	Sept early	absent	5	4b	2	7	0	0	0	9	1	0	6	6	7	4.75
2012-02-06	Feb	summer 11 - 12	P03A	Private	heavy	Sept early	absent	5	5a	2	4	2	1	0	9	1	7	12	7	6	8
2012-02-06	Feb	summer 11 - 12	P03A	Private	heavy	Sept early	absent	5	5b	4	5	0	0	0	9	1	9	8	0	5	5.5
2012-02-06	Feb	summer 11 - 12	P03A	Private	heavy	Sept early	absent	5	6a	0	5	2	2	0	9	1	10	6	6	0	5.5
2012-02-06	Feb	summer 11 - 12	P03A	Private	heavy	Sept early	absent	5	6b	3	6	0	0	0	9	1	9	7	11	0	6.75
2012-02-06	Feb	summer 11 - 12	P03A	Private	heavy	Sept early	absent	5	7a	5	4	0	0	0	9	1	0	12	10	7	7.25
2012-02-06	Feb	summer 11 - 12	P03A	Private	heavy	Sept early	absent	5	7b	6	2	0	1	0	9	1	11	0	0	0	2.75
2012-02-06	Feb	summer 11 - 12	P03A	Private	heavy	Sept early	absent	5	8a	2	5	2	0	0	9	1	10	10	5	0	6.25
2012-02-06	Feb	summer 11 - 12	P03A	Private	heavy	Sept early	absent	5	8b	5	4	0	0	0	9	1	0	10	8	10	7
2012-02-06	Feb	summer 11 - 12	P03A	Private	heavy	Sept early	absent	5	9a	4	5	0	0	0	9	1	15	0	5	9	7.25
2012-02-06	Feb	summer 11 - 12	P03A	Private	heavy	Sept early	absent	5	9b	2	6	1	0	0	9	1	10	0	10	9	7.25
2012-02-06	Feb	summer 11 - 12	P03A	Private	heavy	Sept early	absent	5	10a	1	8	0	0	0	9	1	3	6	7	0	4
2012-02-06	Feb	summer 11 - 12	P03A	Private	heavy	Sept early	absent	5	10b	2	7	0	0	0	9	1	2	7	0	0	2.25
2012-02-06	Feb	summer 11 - 12	P10	Private	light	Sept early	present	7	1a	1	5	1	2	0	9	1	16	7	15	12	12.5
2012-02-06	Feb	summer 11 - 12	P10	Private	light	Sept early	present	7	1b	6	3	0	0	0	9	1	21	17	0	0	9.5
2012-02-06	Feb	summer 11 - 12	P10	Private	light	Sept early	present	7	2a	2	7	0	0	0	9	1	8	6	7	5	6.5
2012-02-06	Feb	summer 11 - 12	P10	Private	light	Sept early	present	7	2b	2	7	0	0	0	9	1	11	10	8	15	11
2012-02-06	Feb	summer 11 - 12	P10	Private	light	Sept early	present	7	3a	1	8	0	0	0	9	1	30	15	16	16	19.25
2012-02-06	Feb	summer 11 - 12	P10	Private	light	Sept early	present	7	3b	0	9	0	0	0	9	1	40	39	40	39	39.5
2012-02-06	Feb	summer 11 - 12	P10	Private	light	Sept early	present	7	4a	2	6	1	0	0	9	1	25	20	13	10	17
2012-02-06	Feb	summer 11 - 12	P10	Private	light	Sept early	present	7	4b	0	9	0	0	0	9	1	20	23	24	24	22.75
2012-02-06	Feb	summer 11 - 12	P10	Private	light	Sept early	present	7	5a	3	6	0	0	0	9	1	9	15	8	5	9.25
2012-02-06	Feb	summer 11 - 12	P10	Private	light	Sept early	present	7	5b	4	5	0	0	0	9	1	15	14	7	7	10.75
2012-02-06	Feb	summer 11 - 12	P10	Private	light	Sept early	present	7	6a	2	7	0	0	0	9	1	10	8	12	0	7.5
2012-02-06	Feb	summer 11 - 12	P10	Private	light	Sept early	present	7	6b	1	8	0	0	0	9	1	20	17	16	14	16.75
2012-02-06	Feb	summer 11 - 12	P10	Private	light	Sept early	present	7	7a	2	7	0	0	0	9	1	23	13	14	14	16
2012-02-06	Feb	summer 11 - 12	P10	Private	light	Sept early	present	7	7b	3	6	0	0	0	9	1	9	6	6	6	6.75
2012-02-06	Feb	summer 11 - 12	P10	Private	light	Sept early	present	7	8a	0	9	0	0	0	9	1	12	16	16	12	14
2012-02-06	Feb	summer 11 - 12	P10	Private	light	Sept early	present	7	8b	2	7	0	0	0	9	1	8	10	6	16	10
2012-02-06	Feb	summer 11 - 12	P10	Private	light	Sept early	present	7	9a	1	8	0	0	0	9	1	10	10	10	8	9.5
2012-02-06	Feb	summer 11 - 12	P10	Private	light	Sept early	present	7	9b	2	6	1	0	0	9	1	13	14	6	16	12.25
2012-02-06	Feb	summer 11 - 12	P10	Private	light	Sept early	present	7	10a	0	9	0	0	0	9	1	18	20	20	18	19
2012-02-06	Feb	summer 11 - 12	P10	Private	light	Sept early	present	7	10b	4	5	0	0	0	9	1	20	20	0	22	15.5
2012-02-06	Feb	summer 11 - 12	P50	Private	light	July late	absent	10	1a	2	6	1	0	0	9	1	14	19	13	15	15.25
2012-02-06	Feb	summer 11 - 12	P50	Private	light	July late	absent	10	1b	0	7	0	2	0	9	1	11	20	9	9	12.25
2012-02-06	Feb	summer 11 - 12	P50	Private	light	July late	absent	10	2a	2	6	0	1	0	9	1	11	14	9	7	10.25
2012-02-06	Feb	summer 11 - 12	P50	Private	light	July late	absent	10	2b	1	5	0	3	0	9	1	15	5	10	7	9.25
2012-02-06	Feb	summer 11 - 12	P50	Private	light	July late	absent	10	3a	4	5	0	0	0	9	1	15	9	9	17	12.5
2012-02-06	Feb	summer 11 - 12	P50	Private	light	July late	absent	10	3b	0	6	2	1	0	9	1	13	10	12	8	10.75
2012-02-06	Feb	summer 11 - 12	P50	Private	light	July late	absent	10	4a	2	7	0	0	0	9	1	13	6	10	12	10.25
2012-02-06	Feb	summer 11 - 12	P50	Private	light	July late	absent	10	4b	1	5	0	3	0	9	1	15	0	8	0	5.75
2012-02-06	Feb	summer 11 - 12	P50	Private	light	July late	absent	10	5a	2	7	0	0	0	9	1	13	4	0	6	5.75
2012-02-06	Feb	summer 11 - 12	P50	Private	light	July late	absent	10	5b	1	8	0	0	0	9	1	12	10	12	9	10.75
2012-02-06	Feb	summer 11 - 12	P50	Private	light	July late	absent	10	6a	3	6	0	0	0	9	1	11	12	9	9	10.25
2012-02-06	Feb	summer 11 - 12	P50	Private	light	July late	absent	10	6b	1	6	0	2	0	9	1	10	0	12	0	5.5
2012-02-06	Feb	summer 11 - 12	P50	Private	light	July late	absent	10	7a	2	4	2	1	0	9	1	16	5	0	0	5.25
2012-02-06	Feb	summer 11 - 12	P50	Private	light	July late	absent	10	7b	3	6	0	0	0	9	1	14	11	10	0	8.75
2012-02-06	Feb	summer 11 - 12	P50	Private	light	July late	absent	10	8a	4	5	0	0	0	9	1	0	8	10	6	6
2012-02-06	Feb	summer 11 - 12	P50	Private	light	July late	absent	10	8b	4	3	0	2	0	9	1	10	0	0	0	2.5
2012-02-06	Feb	summer 11 - 12	P50	Private	light	July late	absent	10	9a	3	6	0	0	0	9	1	12	14	7	9	10.5
2012-02-06	Feb	summer 11 - 12	P50	Private	light	July late	absent	10	9b	0	9	0	0	0	9	1	19	11	15	10	13.75
2012-02-06	Feb	summer 11 - 12	P50	Private	light	July late	absent	10	10a	1	7	0	1	0	9	1	13	15	17	10	13.75
2012-02-06	Feb	summer 11 - 12	P50	Private	light	July late	absent	10	10b	0	9	0	0	0	9	1	15	15	19	9	14.5
2012-02-06	Feb	summer 11 - 12	P54	Private	heavy	July late	absent	5	1a	4	5	0	0	0	9	1	17	11	18	20	16.5
2012-02-06	Feb	summer 11 - 12	P54	Private	heavy	July late	absent	5	1b	3	3	0	3	0	9	1	9	6	4	8	6.75
2012-02-06	Feb	summer 11 - 12	P54	Private	heavy	July late	absent	5	2a	2	7	0	0	0	9	1	4	7	5	0	4
2012-02-06	Feb	summer 11 - 12	P54	Private	heavy	July late	absent	5	2b	3	5	0	1	0	9	1	5	5	4	9	5.75
2012-02-06	Feb	summer 11 - 12	P54	Private	heavy	July late	absent	5	3a	2	5	2	0	0	9	1	7	8	12	7	8.5
2012-02-06	Feb	summer 11 - 12	P54	Private	heavy	July late	absent	5	3b	0	8	1	0	0	9	1	7	7	8	4	6.5
2012-02-06	Feb	summer 11 - 12	P54	Private	heavy	July late	absent	5	4a	5	4	0	0	0	9	1	15	15	12	0	10.5
2012-02-06	Feb	summer 11 - 12	P54	Private	heavy	July late	absent	5	4b	3	6	0	0	0	9	1	15	12	9	7	10.75
2012-02-06	Feb	summer 11 - 12	P54	Private	heavy	July late	absent	5	5a	2	4	3	0	0	9	1	12	9	15	9	11.25
2012-02-06	Feb	summer 11 - 12	P54	Private	heavy	July late	absent	5	5b	2	7	0	0	0	9	1	13	12	10	0	8.75
2012-02-06	Feb	summer 11 - 12	P54	Private	heavy	July late	absent	5	6a	1	8	0	0	0	9	1	16	14	12	11	13.25
2012-02-06	Feb	summer 11 - 12	P54	Private	heavy	July late	absent	5	6b	3	4	2	0	0	9	1	9	0	0	0	2.25
2012-02-06	Feb	summer 11 - 12	P54	Private	heavy	July late	absent	5	7a	4	5	0	0	0	9	1	14	13	0	0	6.75
2012-02-06	Feb	summer 11 - 12	P54	Private	heavy	July late	absent	5	7b	3	6	0	0	0	9	1	14	12	8	10	11
2012-02-06	Feb	summer 11 - 12	P54	Private	heavy	July late	absent	5	8a	0	8	1	0	0	9	1	9	15	15	10	12.25
2012-02-06	Feb	summer 11 - 12	P54	Private	heavy	July late	absent	5	8b	0	9	0	0	0	9	1	13	14	11	0	9.5
2012-02-06	Feb	summer 11 - 12	P54	Private	heavy	July late	absent	5	9a	4	5	0	0	0	9	1	11	0	0	0	2.75
2012-02-06	Feb	summer 11 - 12	P54	Private	heavy	July late	absent	5	9b	2	7	0	0	0	9	1	17	12	18	14	15.25
2012-02-06	Feb	summer 11 - 12	P54	Private	heavy	July late	absent	5	10a	3	5	1	0	0	9	1	9	8	12	10	9.75
2012-02-06	Feb	summer 11 - 12	P54	Private	heavy	July late	absent	5	10b	3	6	0	0	0	9	1	7	0	10	6	5.75
2012-02-07	Feb	summer 11 - 12	P01	Eskom	heavy	Sept early	present	4	1a	2	7	0	0	0	9	1	7	8	7	5	6.75
2012-02-07	Feb	summer 11 - 12	P01	Eskom	heavy	Sept early	present	4	1b	4	5	0	0	0	9	1	8	11	7	5	7.75
2012-02-07	Feb	summer 11 - 12	P01	Eskom	heavy	Sept early	present	4	2a	2	6	0	1	0	9	1	7	6	6	9	7
2012-02-07	Feb	summer 11 - 12	P01	Eskom	heavy	Sept early	present	4	2b	0	5	0	4	0	9	1	6	10	5	17	9.5
2012-02-07	Feb	summer 11 - 12	P01	Eskom	heavy	Sept early	present	4	3a	2	4	0	3	0	9	1	0	12	9	4	6.25
2012-02-07	Feb	summer 11 - 12	P01	Eskom	heavy	Sept early	present	4	3b	0	7	0	2	0	9	1	13	14	9	0	9
2012-02-07	Feb	summer 11 - 12	P01	Eskom	heavy	Sept early	present	4	4a	3	6	0	0	0	9	1	8	15	10	16	12.25
2012-02-07	Feb	summer 11 - 12	P01	Eskom	heavy	Sept early	present	4	4b	2	5	0	2	0	9	1	9	11	17	10	11.75
2012-02-07	Feb	summer 11 - 12	P01	Eskom	heavy	Sept early	present	4	5a	3	4	0	2	0	9	1	16	8	8	0	8
2012-02-07	Feb	summer 11 - 12	P01	Eskom	heavy	Sept early	present	4	5b	3	6	0	0	0	9	1	0	18	10	8	9
2012-02-07	Feb	summer 11 - 12	P01	Eskom	heavy	Sept early	present	4	6a	1	5	0	3	0	9	1	10	0	0	0	2.5
2012-02-07	Feb	summer 11 - 12	P01	Eskom	heavy	Sept early	present	4	6b	4	4	1	0	0	9	1	6	6	10	5	6.75
2012-02-07	Feb	summer 11 - 12	P01	Eskom	heavy	Sept early	present	4	7a	4	5	0	0	0	9	1	10	12	10	0	8
2012-02-07	Feb	summer 11 - 12	P01	Eskom	heavy	Sept early	present	4	7b	1	4	2	2	0	9	1	11	14	0	0	6.25
2012-02-07	Feb	summer 11 - 12	P01	Eskom	heavy	Sept early	present	4	8a	1	8	0	0	0	9	1	14	10	7	9	10
2012-02-07	Feb	summer 11 - 12	P01	Eskom	heavy	Sept early	present	4	8b	3	6	0	0	0	9	1	17	15	11	17	15
2012-02-07	Feb	summer 11 - 12	P01	Eskom	heavy	Sept early	present	4	9a	2	7	0	0	0	9	1	14	12	9	9	11
2012-02-07	Feb	summer 11 - 12	P01	Eskom	heavy	Sept early	present	4	9b	6	3	0	0	0	9	1	11	0	0	0	2.75
2012-02-07	Feb	summer 11 - 12	P01	Eskom	heavy	Sept early	present	4	10a	2	6	0	1	0	9	1	17	12	10	8	11.75
2012-02-07	Feb	summer 11 - 12	P01	Eskom	heavy	Sept early	present	4	10b	4	5	0	0	0	9	1	15	13	17	20	16.25
2012-02-07	Feb	summer 11 - 12	P03	Eskom	heavy	Oct late	present	7	1a	0	7	0	2	0	9	1	4	2	8	0	3.5
2012-02-07	Feb	summer 11 - 12	P03	Eskom	heavy	Oct late	present	7	1b	1	5	0	3	0	9	1	4	3	0	0	1.75
2012-02-07	Feb	summer 11 - 12	P03	Eskom	heavy	Oct late	present	7	2a	2	5	0	2	0	9	1	8	7	3	4	5.5
2012-02-07	Feb	summer 11 - 12	P03	Eskom	heavy	Oct late	present	7	2b	2	6	0	1	0	9	1	6	5	9	4	6
2012-02-07	Feb	summer 11 - 12	P03	Eskom	heavy	Oct late	present	7	3a	3	6	0	0	0	9	1	11	13	13	10	11.75
2012-02-07	Feb	summer 11 - 12	P03	Eskom	heavy	Oct late	present	7	3b	1	8	0	0	0	9	1	15	11	9	6	10.25
2012-02-07	Feb	summer 11 - 12	P03	Eskom	heavy	Oct late	present	7	4a	2	7	0	0	0	9	1	17	20	15	11	15.75
2012-02-07	Feb	summer 11 - 12	P03	Eskom	heavy	Oct late	present	7	4b	2	5	2	0	0	9	1	9	15	0	4	7
2012-02-07	Feb	summer 11 - 12	P03	Eskom	heavy	Oct late	present	7	5a	1	3	3	2	0	9	1	20	12	0	0	8
2012-02-07	Feb	summer 11 - 12	P03	Eskom	heavy	Oct late	present	7	5b	2	7	0	0	0	9	1	11	16	11	9	11.75
2012-02-07	Feb	summer 11 - 12	P03	Eskom	heavy	Oct late	present	7	6a	1	8	0	0	0	9	1	15	10	11	10	11.5
2012-02-07	Feb	summer 11 - 12	P03	Eskom	heavy	Oct late	present	7	6b	2	7	0	0	0	9	1	11	0	4	13	7
2012-02-07	Feb	summer 11 - 12	P03	Eskom	heavy	Oct late	present	7	7a	3	4	0	2	0	9	1	9	17	28	13	16.75
2012-02-07	Feb	summer 11 - 12	P03	Eskom	heavy	Oct late	present	7	7b	1	4	4	0	0	9	1	6	15	4	0	6.25
2012-02-07	Feb	summer 11 - 12	P03	Eskom	heavy	Oct late	present	7	8a	3	6	0	0	0	9	1	15	11	10	6	10.5
2012-02-07	Feb	summer 11 - 12	P03	Eskom	heavy	Oct late	present	7	8b	2	7	0	0	0	9	1	13	0	11	9	8.25
2012-02-07	Feb	summer 11 - 12	P03	Eskom	heavy	Oct late	present	7	9a	3	4	2	0	0	9	1	8	10	0	11	7.25
2012-02-07	Feb	summer 11 - 12	P03	Eskom	heavy	Oct late	present	7	9b	0	7	0	2	0	9	1	7	11	10	0	7
2012-02-07	Feb	summer 11 - 12	P03	Eskom	heavy	Oct late	present	7	10a	3	6	0	0	0	9	1	5	9	7	9	7.5
2012-02-07	Feb	summer 11 - 12	P03	Eskom	heavy	Oct late	present	7	10b	4	5	0	0	0	9	1	8	10	0	0	4.5
2012-02-07	Feb	summer 11 - 12	P57	Private	heavy	Aug mid	absent	8	1a	2	5	1	1	0	9	1	10	8	9	8	8.75
2012-02-07	Feb	summer 11 - 12	P57	Private	heavy	Aug mid	absent	8	1b	2	6	1	0	0	9	1	8	13	10	9	10
2012-02-07	Feb	summer 11 - 12	P57	Private	heavy	Aug mid	absent	8	2a	3	6	0	0	0	9	1	0	6	4	8	4.5
2012-02-07	Feb	summer 11 - 12	P57	Private	heavy	Aug mid	absent	8	2b	2	7	0	0	0	9	1	11	8	10	4	8.25
2012-02-07	Feb	summer 11 - 12	P57	Private	heavy	Aug mid	absent	8	3a	2	5	0	2	0	9	1	9	8	8	7	8
2012-02-07	Feb	summer 11 - 12	P57	Private	heavy	Aug mid	absent	8	3b	0	8	1	0	0	9	1	10	10	9	10	9.75
2012-02-07	Feb	summer 11 - 12	P57	Private	heavy	Aug mid	absent	8	4a	0	7	2	0	0	9	1	10	16	14	11	12.75
2012-02-07	Feb	summer 11 - 12	P57	Private	heavy	Aug mid	absent	8	4b	2	7	0	0	0	9	1	11	15	14	10	12.5
2012-02-07	Feb	summer 11 - 12	P57	Private	heavy	Aug mid	absent	8	5a	1	8	0	0	0	9	1	16	12	12	0	10
2012-02-07	Feb	summer 11 - 12	P57	Private	heavy	Aug mid	absent	8	5b	1	5	0	3	0	9	1	13	11	0	0	6
2012-02-07	Feb	summer 11 - 12	P57	Private	heavy	Aug mid	absent	8	6a	2	6	1	0	0	9	1	13	7	10	0	7.5
2012-02-07	Feb	summer 11 - 12	P57	Private	heavy	Aug mid	absent	8	6b	0	7	0	2	0	9	1	12	12	9	8	10.25
2012-02-07	Feb	summer 11 - 12	P57	Private	heavy	Aug mid	absent	8	7a	3	6	0	0	0	9	1	0	11	13	11	8.75
2012-02-07	Feb	summer 11 - 12	P57	Private	heavy	Aug mid	absent	8	7b	0	9	0	0	0	9	1	2	4	8	0	3.5
2012-02-07	Feb	summer 11 - 12	P57	Private	heavy	Aug mid	absent	8	8a	2	4	1	2	0	9	1	10	7	9	0	6.5
2012-02-07	Feb	summer 11 - 12	P57	Private	heavy	Aug mid	absent	8	8b	4	3	2	0	0	9	1	11	5	4	7	6.75
2012-02-07	Feb	summer 11 - 12	P57	Private	heavy	Aug mid	absent	8	9a	1	5	3	0	0	9	1	7	10	13	12	10.5
2012-02-07	Feb	summer 11 - 12	P57	Private	heavy	Aug mid	absent	8	9b	2	5	2	0	0	9	1	9	7	15	10	10.25
2012-02-07	Feb	summer 11 - 12	P57	Private	heavy	Aug mid	absent	8	10a	3	6	0	0	0	9	1	10	13	8	9	10
2012-02-07	Feb	summer 11 - 12	P57	Private	heavy	Aug mid	absent	8	10b	2	4	0	3	0	9	1	9	0	5	0	3.5
2012-02-11	Feb	summer 11 - 12	P07	Eskom	heavy	Oct early	present	8	1a	3	5	1	0	0	9	1	5	3	0	2	2.5
2012-02-11	Feb	summer 11 - 12	P07	Eskom	heavy	Oct early	present	8	1b	2	4	0	3	0	9	1	4	4	0	3	2.75
2012-02-11	Feb	summer 11 - 12	P07	Eskom	heavy	Oct early	present	8	2a	3	6	0	0	0	9	1	6	3	5	5	4.75
2012-02-11	Feb	summer 11 - 12	P07	Eskom	heavy	Oct early	present	8	2b	4	5	0	0	0	9	1	7	0	0	0	1.75
2012-02-11	Feb	summer 11 - 12	P07	Eskom	heavy	Oct early	present	8	3a	3	6	0	0	0	9	1	13	12	10	0	8.75
2012-02-11	Feb	summer 11 - 12	P07	Eskom	heavy	Oct early	present	8	3b	2	7	0	0	0	9	1	7	7	4	5	5.75
2012-02-11	Feb	summer 11 - 12	P07	Eskom	heavy	Oct early	present	8	4a	2	4	2	1	0	9	1	13	13	5	0	7.75
2012-02-11	Feb	summer 11 - 12	P07	Eskom	heavy	Oct early	present	8	4b	3	4	0	2	0	9	1	14	11	8	8	10.25
2012-02-11	Feb	summer 11 - 12	P07	Eskom	heavy	Oct early	present	8	5a	2	7	0	0	0	9	1	4	5	7	5	5.25
2012-02-11	Feb	summer 11 - 12	P07	Eskom	heavy	Oct early	present	8	5b	2	6	0	1	0	9	1	10	8	6	10	8.5
2012-02-11	Feb	summer 11 - 12	P07	Eskom	heavy	Oct early	present	8	6a	3	3	3	0	0	9	1	8	8	16	9	10.25
2012-02-11	Feb	summer 11 - 12	P07	Eskom	heavy	Oct early	present	8	6b	1	7	1	0	0	9	1	8	8	6	9	7.75
2012-02-11	Feb	summer 11 - 12	P07	Eskom	heavy	Oct early	present	8	7a	1	6	0	0	2	9	1	0	7	8	5	5
2012-02-11	Feb	summer 11 - 12	P07	Eskom	heavy	Oct early	present	8	7b	3	4	2	0	0	9	1	8	9	9	11	9.25
2012-02-11	Feb	summer 11 - 12	P07	Eskom	heavy	Oct early	present	8	8a	2	3	1	3	0	9	1	13	14	7	0	8.5
2012-02-11	Feb	summer 11 - 12	P07	Eskom	heavy	Oct early	present	8	8b	2	7	0	0	0	9	1	12	9	13	13	11.75
2012-02-11	Feb	summer 11 - 12	P07	Eskom	heavy	Oct early	present	8	9a	4	5	0	0	0	9	1	5	6	8	9	7
2012-02-11	Feb	summer 11 - 12	P07	Eskom	heavy	Oct early	present	8	9b	3	3	0	3	0	9	1	4	6	0	0	2.5
2012-02-11	Feb	summer 11 - 12	P07	Eskom	heavy	Oct early	present	8	10a	2	4	1	2	0	9	1	11	7	9	8	8.75
2012-02-11	Feb	summer 11 - 12	P07	Eskom	heavy	Oct early	present	8	10b	3	6	0	0	0	9	1	3	6	4	0	3.25
2012-02-11	Feb	summer 11 - 12	P22	Eskom	none	Oct mid	present	8	1a	2	7	0	0	0	9	1	17	10	15	8	12.5
2012-02-11	Feb	summer 11 - 12	P22	Eskom	none	Oct mid	present	8	1b	1	7	0	1	0	9	1	8	12	9	0	7.25
2012-02-11	Feb	summer 11 - 12	P22	Eskom	none	Oct mid	present	8	2a	1	4	2	2	0	9	1	13	14	0	8	8.75
2012-02-11	Feb	summer 11 - 12	P22	Eskom	none	Oct mid	present	8	2b	2	6	1	0	0	9	1	10	8	10	7	8.75
2012-02-11	Feb	summer 11 - 12	P22	Eskom	none	Oct mid	present	8	3a	4	3	0	2	0	9	1	7	0	0	0	1.75
2012-02-11	Feb	summer 11 - 12	P22	Eskom	none	Oct mid	present	8	3b	0	4	0	5	0	9	1	17	0	8	0	6.25
2012-02-11	Feb	summer 11 - 12	P22	Eskom	none	Oct mid	present	8	4a	1	6	2	0	0	9	1	15	10	12	9	11.5
2012-02-11	Feb	summer 11 - 12	P22	Eskom	none	Oct mid	present	8	4b	3	6	0	0	0	9	1	10	11	0	9	7.5
2012-02-11	Feb	summer 11 - 12	P22	Eskom	none	Oct mid	present	8	5a	4	5	0	0	0	9	1	14	10	8	6	9.5
2012-02-11	Feb	summer 11 - 12	P22	Eskom	none	Oct mid	present	8	5b	1	8	0	0	0	9	1	6	13	12	9	10
2012-02-11	Feb	summer 11 - 12	P22	Eskom	none	Oct mid	present	8	6a	2	5	0	2	0	9	1	6	0	5	8	4.75
2012-02-11	Feb	summer 11 - 12	P22	Eskom	none	Oct mid	present	8	6b	3	6	0	0	0	9	1	16	12	12	10	12.5
2012-02-11	Feb	summer 11 - 12	P22	Eskom	none	Oct mid	present	8	7a	0	7	0	2	0	9	1	14	16	14	13	14.25
2012-02-11	Feb	summer 11 - 12	P22	Eskom	none	Oct mid	present	8	7b	4	4	1	0	0	9	1	21	15	15	12	15.75
2012-02-11	Feb	summer 11 - 12	P22	Eskom	none	Oct mid	present	8	8a	2	4	3	0	0	9	1	7	12	12	13	11
2012-02-11	Feb	summer 11 - 12	P22	Eskom	none	Oct mid	present	8	8b	1	6	0	2	0	9	1	11	10	6	0	6.75
2012-02-11	Feb	summer 11 - 12	P22	Eskom	none	Oct mid	present	8	9a	3	1	0	0	5	9	1	0	0	0	0	0
2012-02-11	Feb	summer 11 - 12	P22	Eskom	none	Oct mid	present	8	9b	0	5	0	4		9	1	11	9	9	0	7.25
2012-02-11	Feb	summer 11 - 12	P22	Eskom	none	Oct mid	present	8	10a	2	7	0	0	0	9	1	14	9	13	11	11.75
2012-02-11	Feb	summer 11 - 12	P22	Eskom	none	Oct mid	present	8	10b	1	6	0	2	0	9	1	17	9	8	12	11.5
2012-02-12	Feb	summer 11 - 12	P39	Eskom	none	Aug late	present	9	1a	1	8	0	0	0	9	1	20	14	14	10	14.5
2012-02-12	Feb	summer 11 - 12	P39	Eskom	none	Aug late	present	9	1b	2	7	0	0	0	9	1	13	11	10	17	12.75
2012-02-12	Feb	summer 11 - 12	P39	Eskom	none	Aug late	present	9	2a	0	6	0	3	0	9	1	9	11	12	9	10.25
2012-02-12	Feb	summer 11 - 12	P39	Eskom	none	Aug late	present	9	2b	1	4	0	4	0	9	1	12	13	13	12	12.5
2012-02-12	Feb	summer 11 - 12	P39	Eskom	none	Aug late	present	9	3a	0	9	0	0	0	9	1	22	15	12	25	18.5
2012-02-12	Feb	summer 11 - 12	P39	Eskom	none	Aug late	present	9	3b	0	7	2	0	0	9	1	12	10	17	11	12.5
2012-02-12	Feb	summer 11 - 12	P39	Eskom	none	Aug late	present	9	4a	0	6	2	1	0	9	1	21	18	14	14	16.75
2012-02-12	Feb	summer 11 - 12	P39	Eskom	none	Aug late	present	9	4b	0	6	3	0	0	9	1	14	9	14	16	13.25
2012-02-12	Feb	summer 11 - 12	P39	Eskom	none	Aug late	present	9	5a	2	7	0	0	0	9	1	13	15	11	17	14
2012-02-12	Feb	summer 11 - 12	P39	Eskom	none	Aug late	present	9	5b	1	6	0	2	0	9	1	14	12	11	11	12
2012-02-12	Feb	summer 11 - 12	P39	Eskom	none	Aug late	present	9	6a	2	4	0	3	0	9	1	9	11	12	9	10.25
2012-02-12	Feb	summer 11 - 12	P39	Eskom	none	Aug late	present	9	6b	0	6	0	3	0	9	1	6	12	17	11	11.5
2012-02-12	Feb	summer 11 - 12	P39	Eskom	none	Aug late	present	9	7a	1	8	0	0	0	9	1	12	16	14	13	13.75
2012-02-12	Feb	summer 11 - 12	P39	Eskom	none	Aug late	present	9	7b	0	7	0	2	0	9	1	13	13	10	9	11.25
2012-02-12	Feb	summer 11 - 12	P39	Eskom	none	Aug late	present	9	8a	2	6	0	1	0	9	1	14	11	15	20	15
2012-02-12	Feb	summer 11 - 12	P39	Eskom	none	Aug late	present	9	8b	0	8	0	1	0	9	1	13	17	15	10	13.75
2012-02-12	Feb	summer 11 - 12	P39	Eskom	none	Aug late	present	9	9a	3	6	0	0	0	9	1	14	15	11	0	10
2012-02-12	Feb	summer 11 - 12	P39	Eskom	none	Aug late	present	9	9b	0	7	0	2	0	9	1	16	16	16	10	14.5
2012-02-12	Feb	summer 11 - 12	P39	Eskom	none	Aug late	present	9	10a	0	9	0	0	0	9	1	21	22	21	18	20.5
2012-02-12	Feb	summer 11 - 12	P39	Eskom	none	Aug late	present	9	10b	0	7	2	0	0	9	1	15	13	13	17	14.5
2012-02-12	Feb	summer 11 - 12	P41	Eskom	none	Aug late	present	4	1a	2	7	0	0	0	9	1	11	13	11	10	11.25
2012-02-12	Feb	summer 11 - 12	P41	Eskom	none	Aug late	present	4	1b	0	6	1	2	0	9	1	13	10	10	9	10.5
2012-02-12	Feb	summer 11 - 12	P41	Eskom	none	Aug late	present	4	2a	1	8	0	0	0	9	1	12	17	15	15	14.75
2012-02-12	Feb	summer 11 - 12	P41	Eskom	none	Aug late	present	4	2b	0	7	2	0	0	9	1	17	12	10	0	9.75
2012-02-12	Feb	summer 11 - 12	P41	Eskom	none	Aug late	present	4	3a	0	9	0	0	0	9	1	16	18	17	17	17
2012-02-12	Feb	summer 11 - 12	P41	Eskom	none	Aug late	present	4	3b	1	8	0	0	0	9	1	11	13	13	10	11.75
2012-02-12	Feb	summer 11 - 12	P41	Eskom	none	Aug late	present	4	4a	0	9	0	0	0	9	1	22	27	22	21	23
2012-02-12	Feb	summer 11 - 12	P41	Eskom	none	Aug late	present	4	4b	0	7	2	0	0	9	1	30	13	17	16	19
2012-02-12	Feb	summer 11 - 12	P41	Eskom	none	Aug late	present	4	5a	0	8	1	0	0	9	1	25	19	23	17	21
2012-02-12	Feb	summer 11 - 12	P41	Eskom	none	Aug late	present	4	5b	2	7	0	0	0	9	1	20	18	23	20	20.25
2012-02-12	Feb	summer 11 - 12	P41	Eskom	none	Aug late	present	4	6a	0	6	0	3	0	9	1	18	16	16	14	16
2012-02-12	Feb	summer 11 - 12	P41	Eskom	none	Aug late	present	4	6b	3	5	1	0	0	9	1	0	18	13	13	11
2012-02-12	Feb	summer 11 - 12	P41	Eskom	none	Aug late	present	4	7a	0	9	0	0	0	9	1	12	15	15	13	13.75
2012-02-12	Feb	summer 11 - 12	P41	Eskom	none	Aug late	present	4	7b	1	8	0	0	0	9	1	17	11	24	15	16.75
2012-02-12	Feb	summer 11 - 12	P41	Eskom	none	Aug late	present	4	8a	2	6	0	1	0	9	1	16	16	13	10	13.75
2012-02-12	Feb	summer 11 - 12	P41	Eskom	none	Aug late	present	4	8b	0	8	1	0	0	9	1	10	13	21	15	14.75
2012-02-12	Feb	summer 11 - 12	P41	Eskom	none	Aug late	present	4	9a	0	7	0	2	0	9	1	12	11	16	0	9.75
2012-02-12	Feb	summer 11 - 12	P41	Eskom	none	Aug late	present	4	9b	2	4	1	2	0	9	1	10	10	0	7	6.75
2012-02-12	Feb	summer 11 - 12	P41	Eskom	none	Aug late	present	4	10a	2	4	0	3	0	9	1	17	12	0	0	7.25
2012-02-12	Feb	summer 11 - 12	P41	Eskom	none	Aug late	present	4	10b	0	3	2	4	0	9	1	14	0	0	0	3.5
2012-02-13	Feb	summer 11 - 12	P38	Eskom	none	Oct mid	present	7	1a	2	7	0	0	0	9	1	11	13	10	10	11
2012-02-13	Feb	summer 11 - 12	P38	Eskom	none	Oct mid	present	7	1b	1	6	0	2	0	9	1	19	10	12	0	10.25
2012-02-13	Feb	summer 11 - 12	P38	Eskom	none	Oct mid	present	7	2a	0	7	1	1	0	9	1	9	9	10	11	9.75
2012-02-13	Feb	summer 11 - 12	P38	Eskom	none	Oct mid	present	7	2b	0	6	0	3	0	9	1	9	8	12	12	10.25
2012-02-13	Feb	summer 11 - 12	P38	Eskom	none	Oct mid	present	7	3a	1	8	0	0	0	9	1	9	13	4	7	8.25
2012-02-13	Feb	summer 11 - 12	P38	Eskom	none	Oct mid	present	7	3b	3	6	0	0	0	9	1	12	7	6	10	8.75
2012-02-13	Feb	summer 11 - 12	P38	Eskom	none	Oct mid	present	7	4a	2	5	2	0	0	9	1	8	20	19	22	17.25
2012-02-13	Feb	summer 11 - 12	P38	Eskom	none	Oct mid	present	7	4b	4	3	0	2	0	9	1	15	19	17	0	12.75
2012-02-13	Feb	summer 11 - 12	P38	Eskom	none	Oct mid	present	7	5a	0	7	0	2	0	9	1	14	12	11	20	14.25
2012-02-13	Feb	summer 11 - 12	P38	Eskom	none	Oct mid	present	7	5b	2	6	1	0	0	9	1	27	22	30	23	25.5
2012-02-13	Feb	summer 11 - 12	P38	Eskom	none	Oct mid	present	7	6a	3	6	0	0	0	9	1	26	24	23	0	18.25
2012-02-13	Feb	summer 11 - 12	P38	Eskom	none	Oct mid	present	7	6b	0	7	2	0	0	9	1	30	19	24	20	23.25
2012-02-13	Feb	summer 11 - 12	P38	Eskom	none	Oct mid	present	7	7a	0	8	1	0	0	9	1	34	40	36	19	32.25
2012-02-13	Feb	summer 11 - 12	P38	Eskom	none	Oct mid	present	7	7b	0	7	0	2	0	9	1	38	29	26	14	26.75
2012-02-13	Feb	summer 11 - 12	P38	Eskom	none	Oct mid	present	7	8a	0	7	0	2	0	9	1	15	11	10	19	13.75
2012-02-13	Feb	summer 11 - 12	P38	Eskom	none	Oct mid	present	7	8b	0	8	1	0	0	9	1	14	10	11	15	12.5
2012-02-13	Feb	summer 11 - 12	P38	Eskom	none	Oct mid	present	7	9a	2	7	0	0	0	9	1	11	10	0	0	5.25
2012-02-13	Feb	summer 11 - 12	P38	Eskom	none	Oct mid	present	7	9b	2	2	3	2	0	9	1	9	0	0	0	2.25
2012-02-13	Feb	summer 11 - 12	P38	Eskom	none	Oct mid	present	7	10a	1	6	2	0	0	9	1	20	10	11	10	12.75
2012-02-13	Feb	summer 11 - 12	P38	Eskom	none	Oct mid	present	7	10b	1	7	1	0	0	9	1	10	11	16	7	11
2012-02-13	Feb	summer 11 - 12	P40	Eskom	none	Aug late	present	6	1a	0	7	0	2	0	9	1	13	12	11	12	12
2012-02-13	Feb	summer 11 - 12	P40	Eskom	none	Aug late	present	6	1b	3	6	0	0	0	9	1	14	17	17	13	15.25
2012-02-13	Feb	summer 11 - 12	P40	Eskom	none	Aug late	present	6	2a	0	9	0	0	0	9	1	13	11	11	8	10.75
2012-02-13	Feb	summer 11 - 12	P40	Eskom	none	Aug late	present	6	2b	1	8	0	0	0	9	1	14	15	12	12	13.25
2012-02-13	Feb	summer 11 - 12	P40	Eskom	none	Aug late	present	6	3a	1	7	1	0	0	9	1	17	15	18	15	16.25
2012-02-13	Feb	summer 11 - 12	P40	Eskom	none	Aug late	present	6	3b	1	8	0	0	0	9	1	7	9	11	12	9.75
2012-02-13	Feb	summer 11 - 12	P40	Eskom	none	Aug late	present	6	4a	2	4	0	3	0	9	1	17	20	0	0	9.25
2012-02-13	Feb	summer 11 - 12	P40	Eskom	none	Aug late	present	6	4b	0	7	2	0	0	9	1	10	13	14	14	12.75
2012-02-13	Feb	summer 11 - 12	P40	Eskom	none	Aug late	present	6	5a	2	5	0	2	0	9	1	10	10	11	10	10.25
2012-02-13	Feb	summer 11 - 12	P40	Eskom	none	Aug late	present	6	5b	2	7	0	0	0	9	1	7	12	7	10	9
2012-02-13	Feb	summer 11 - 12	P40	Eskom	none	Aug late	present	6	6a	0	8	0	1	0	9	1	11	12	14	14	12.75
2012-02-13	Feb	summer 11 - 12	P40	Eskom	none	Aug late	present	6	6b	0	7	0	2	0	9	1	13	7	11	13	11
2012-02-13	Feb	summer 11 - 12	P40	Eskom	none	Aug late	present	6	7a	2	6	1	0	0	9	1	12	15	10	10	11.75
2012-02-13	Feb	summer 11 - 12	P40	Eskom	none	Aug late	present	6	7b	0	6	1	2	0	9	1	14	15	14	12	13.75
2012-02-13	Feb	summer 11 - 12	P40	Eskom	none	Aug late	present	6	8a	0	7	2	0	0	9	1	10	8	11	8	9.25
2012-02-13	Feb	summer 11 - 12	P40	Eskom	none	Aug late	present	6	8b	1	8	0	0	0	9	1	10	10	14	8	10.5
2012-02-13	Feb	summer 11 - 12	P40	Eskom	none	Aug late	present	6	9a	0	9	0	0	0	9	1	13	9	19	14	13.75
2012-02-13	Feb	summer 11 - 12	P40	Eskom	none	Aug late	present	6	9b	0	7	2	0	0	9	1	10	13	14	17	13.5
2012-02-13	Feb	summer 11 - 12	P40	Eskom	none	Aug late	present	6	10a	2	4	0	3	0	9	1	9	13	12	0	8.5
2012-02-13	Feb	summer 11 - 12	P40	Eskom	none	Aug late	present	6	10b	0	6	1	2	0	9	1	11	10	19	13	13.25
2012-02-14	Feb	summer 11 - 12	P42	Eskom	none	Oct late	absent	4	1a	3	6	0	0	0	9	1	7	10	8	0	6.25
2012-02-14	Feb	summer 11 - 12	P42	Eskom	none	Oct late	absent	4	1b	0	7	2	0	0	9	1	10	15	6	13	11
2012-02-14	Feb	summer 11 - 12	P42	Eskom	none	Oct late	absent	4	2a	2	6	1	0	0	9	1	12	13	9	10	11
2012-02-14	Feb	summer 11 - 12	P42	Eskom	none	Oct late	absent	4	2b	0	7	2	0	0	9	1	20	11	9	11	12.75
2012-02-14	Feb	summer 11 - 12	P42	Eskom	none	Oct late	absent	4	3a	4	5	0	0	0	9	1	19	5	0	10	8.5
2012-02-14	Feb	summer 11 - 12	P42	Eskom	none	Oct late	absent	4	3b	2	6	0	1	0	9	1	8	17	21	18	16
2012-02-14	Feb	summer 11 - 12	P42	Eskom	none	Oct late	absent	4	4a	2	7	0	0	0	9	1	8	10	7	6	7.75
2012-02-14	Feb	summer 11 - 12	P42	Eskom	none	Oct late	absent	4	4b	1	8	0	0	0	9	1	12	12	11	13	12
2012-02-14	Feb	summer 11 - 12	P42	Eskom	none	Oct late	absent	4	5a	2	5	0	2	0	9	1	15	12	14	13	13.5
2012-02-14	Feb	summer 11 - 12	P42	Eskom	none	Oct late	absent	4	5b	3	6	0	0	0	9	1	14	12	11	8	11.25
2012-02-14	Feb	summer 11 - 12	P42	Eskom	none	Oct late	absent	4	6a	2	7	0	0	0	9	1	14	11	6	7	9.5
2012-02-14	Feb	summer 11 - 12	P42	Eskom	none	Oct late	absent	4	6b	1	6	0	2	0	9	1	15	20	12	10	14.25
2012-02-14	Feb	summer 11 - 12	P42	Eskom	none	Oct late	absent	4	7a	1	8	0	0	0	9	1	12	11	10	6	9.75
2012-02-14	Feb	summer 11 - 12	P42	Eskom	none	Oct late	absent	4	7b	0	7	0	2	0	9	1	12	9	10	6	9.25
2012-02-14	Feb	summer 11 - 12	P42	Eskom	none	Oct late	absent	4	8a	5	4	0	0	0	9	1	13	0	0	0	3.25
2012-02-14	Feb	summer 11 - 12	P42	Eskom	none	Oct late	absent	4	8b	3	6	0	0	0	9	1	5	10	14	0	7.25
2012-02-14	Feb	summer 11 - 12	P42	Eskom	none	Oct late	absent	4	9a	0	9	0	0	0	9	1	12	20	10	20	15.5
2012-02-14	Feb	summer 11 - 12	P42	Eskom	none	Oct late	absent	4	9b	4	5	0	0	0	9	1	15	7	14	16	13
2012-02-14	Feb	summer 11 - 12	P42	Eskom	none	Oct late	absent	4	10a	2	5	2	0	0	9	1	13	10	8	15	11.5
2012-02-14	Feb	summer 11 - 12	P42	Eskom	none	Oct late	absent	4	10b	0	6	3	0	0	9	1	10	11	10	7	9.5
2012-02-14	Feb	summer 11 - 12	P63	Private	heavy	Oct late	absent	7	1a	0	9	0	0	0	9	1	12	13	14	12	12.75
2012-02-14	Feb	summer 11 - 12	P63	Private	heavy	Oct late	absent	7	1b	2	7	0	0	0	9	1	19	18	22	14	18.25
2012-02-14	Feb	summer 11 - 12	P63	Private	heavy	Oct late	absent	7	2a	1	6	0	2	0	9	1	10	10	5	12	9.25
2012-02-14	Feb	summer 11 - 12	P63	Private	heavy	Oct late	absent	7	2b	1	6	2	0	0	9	1	14	12	8	11	11.25
2012-02-14	Feb	summer 11 - 12	P63	Private	heavy	Oct late	absent	7	3a	0	8	0	1	0	9	1	9	8	7	7	7.75
2012-02-14	Feb	summer 11 - 12	P63	Private	heavy	Oct late	absent	7	3b	0	7	0	2	0	9	1	12	7	6	0	6.25
2012-02-14	Feb	summer 11 - 12	P63	Private	heavy	Oct late	absent	7	4a	2	6	1	0	0	9	1	15	5	9	9	9.5
2012-02-14	Feb	summer 11 - 12	P63	Private	heavy	Oct late	absent	7	4b	0	6	1	2	0	9	1	12	6	14	10	10.5
2012-02-14	Feb	summer 11 - 12	P63	Private	heavy	Oct late	absent	7	5a	4	5	0	0	0	9	1	5	4	0	0	2.25
2012-02-14	Feb	summer 11 - 12	P63	Private	heavy	Oct late	absent	7	5b	0	6	0	3	0	9	1	0	12	9	0	5.25
2012-02-14	Feb	summer 11 - 12	P63	Private	heavy	Oct late	absent	7	6a	0	4	3	2	0	9	1	6	8	9	4	6.75
2012-02-14	Feb	summer 11 - 12	P63	Private	heavy	Oct late	absent	7	6b	2	6	0	1	0	9	1	10	7	0	0	4.25
2012-02-14	Feb	summer 11 - 12	P63	Private	heavy	Oct late	absent	7	7a	0	6	3	0	0	9	1	10	9	9	8	9
2012-02-14	Feb	summer 11 - 12	P63	Private	heavy	Oct late	absent	7	7b	0	7	2	0	0	9	1	14	6	9	12	10.25
2012-02-14	Feb	summer 11 - 12	P63	Private	heavy	Oct late	absent	7	8a	1	8	0	0	0	9	1	10	7	5	7	7.25
2012-02-14	Feb	summer 11 - 12	P63	Private	heavy	Oct late	absent	7	8b	3	6	0	0	0	9	1	19	19	24	17	19.75
2012-02-14	Feb	summer 11 - 12	P63	Private	heavy	Oct late	absent	7	9a	1	5	0	3	0	9	1	14	9	9	0	8
2012-02-14	Feb	summer 11 - 12	P63	Private	heavy	Oct late	absent	7	9b	2	6	0	1	0	9	1	9	11	5	7	8
2012-02-14	Feb	summer 11 - 12	P63	Private	heavy	Oct late	absent	7	10a	2	7	0	0	0	9	1	10	15	9	12	11.5
2012-02-14	Feb	summer 11 - 12	P63	Private	heavy	Oct late	absent	7	10b	0	6	1	2	0	9	1	6	6	5	7	6
2012-02-21	Feb	summer 11 - 12	P65	Private	none	Oct late	present	6	1a	4	5	0	0	0	9	1	6	19	15	10	12.5
2012-02-21	Feb	summer 11 - 12	P65	Private	none	Oct late	present	6	1b	0	9	0	0	0	9	1	12	16	18	10	14
2012-02-21	Feb	summer 11 - 12	P65	Private	none	Oct late	present	6	2a	0	7	0	2	0	9	1	10	10	6	9	8.75
2012-02-21	Feb	summer 11 - 12	P65	Private	none	Oct late	present	6	2b	2	5	2	0	0	9	1	8	12	8	16	11
2012-02-21	Feb	summer 11 - 12	P65	Private	none	Oct late	present	6	3a	1	6	0	2	0	9	1	4	13	23	13	13.25
2012-02-21	Feb	summer 11 - 12	P65	Private	none	Oct late	present	6	3b	0	7	0	2	0	9	1	17	10	17	8	13
2012-02-21	Feb	summer 11 - 12	P65	Private	none	Oct late	present	6	4a	0	9	0	0	0	9	1	25	31	29	16	25.25
2012-02-21	Feb	summer 11 - 12	P65	Private	none	Oct late	present	6	4b	3	6	0	0	0	9	1	9	10	10	13	10.5
2012-02-21	Feb	summer 11 - 12	P65	Private	none	Oct late	present	6	5a	4	4	0	1	0	9	1	30	10	0	0	10
2012-02-21	Feb	summer 11 - 12	P65	Private	none	Oct late	present	6	5b	3	6	0	0	0	9	1	32	28	15	15	22.5
2012-02-21	Feb	summer 11 - 12	P65	Private	none	Oct late	present	6	6a	2	6	0	1	0	9	1	27	8	11	20	16.5
2012-02-21	Feb	summer 11 - 12	P65	Private	none	Oct late	present	6	6b	3	5	1	0	0	9	1	18	20	9	21	17
2012-02-21	Feb	summer 11 - 12	P65	Private	none	Oct late	present	6	7a	2	7	0	0	0	9	1	13	18	10	28	17.25
2012-02-21	Feb	summer 11 - 12	P65	Private	none	Oct late	present	6	7b	8	1	0	0	0	9	1	0	0	0	0	0
2012-02-21	Feb	summer 11 - 12	P65	Private	none	Oct late	present	6	8a	3	4	0	2	0	9	1	17	20	25	0	15.5
2012-02-21	Feb	summer 11 - 12	P65	Private	none	Oct late	present	6	8b	0	6	0	3	0	9	1	18	10	6	12	11.5
2012-02-21	Feb	summer 11 - 12	P65	Private	none	Oct late	present	6	9a	0	7	2	0	0	9	1	15	12	13	14	13.5
2012-02-21	Feb	summer 11 - 12	P65	Private	none	Oct late	present	6	9b	2	6	0	1	0	9	1	21	10	14	13	14.5
2012-02-21	Feb	summer 11 - 12	P65	Private	none	Oct late	present	6	10a	4	5	0	0	0	9	1	20	10	15	5	12.5
2012-02-21	Feb	summer 11 - 12	P65	Private	none	Oct late	present	6	10b	3	6	0	0	0	9	1	20	26	15	18	19.75
2012-02-21	Feb	summer 11 - 12	P66	Eskom	none	Nov early	absent	7	1a	0	6	1	2	0	9	1	20	21	10	4	13.75
2012-02-21	Feb	summer 11 - 12	P66	Eskom	none	Nov early	absent	7	1b	0	8	0	1	0	9	1	6	11	12	9	9.5
2012-02-21	Feb	summer 11 - 12	P66	Eskom	none	Nov early	absent	7	2a	2	5	0	2	0	9	1	22	16	12	16	16.5
2012-02-21	Feb	summer 11 - 12	P66	Eskom	none	Nov early	absent	7	2b	0	6	0	3	0	9	1	21	10	15	18	16
2012-02-21	Feb	summer 11 - 12	P66	Eskom	none	Nov early	absent	7	3a	1	5	3	0	0	9	1	16	12	13	18	14.75
2012-02-21	Feb	summer 11 - 12	P66	Eskom	none	Nov early	absent	7	3b	0	7	2	0	0	9	1	10	12	15	10	11.75
2012-02-21	Feb	summer 11 - 12	P66	Eskom	none	Nov early	absent	7	4a	2	5	0	2	0	9	1	8	4	6	10	7
2012-02-21	Feb	summer 11 - 12	P66	Eskom	none	Nov early	absent	7	4b	2	4	0	3	0	9	1	9	7	6	4	6.5
2012-02-21	Feb	summer 11 - 12	P66	Eskom	none	Nov early	absent	7	5a	1	8	0	0	0	9	1	16	11	18	14	14.75
2012-02-21	Feb	summer 11 - 12	P66	Eskom	none	Nov early	absent	7	5b	0	7	0	2	0	9	1	10	8	16	22	14
2012-02-21	Feb	summer 11 - 12	P66	Eskom	none	Nov early	absent	7	6a	1	7	0	0	1	9	1	17	17	11	18	15.75
2012-02-21	Feb	summer 11 - 12	P66	Eskom	none	Nov early	absent	7	6b	0	6	0	3	0	9	1	17	10	8	15	12.5
2012-02-21	Feb	summer 11 - 12	P66	Eskom	none	Nov early	absent	7	7a	0	7	2	0	0	9	1	20	36	35	16	26.75
2012-02-21	Feb	summer 11 - 12	P66	Eskom	none	Nov early	absent	7	7b	3	6	0	0	0	9	1	23	12	18	0	13.25
2012-02-21	Feb	summer 11 - 12	P66	Eskom	none	Nov early	absent	7	8a	0	4	5	0	0	9	1	6	4	13	12	8.75
2012-02-21	Feb	summer 11 - 12	P66	Eskom	none	Nov early	absent	7	8b	0	7	2	0	0	9	1	6	10	30	14	15
2012-02-21	Feb	summer 11 - 12	P66	Eskom	none	Nov early	absent	7	9a	0	6	0	3	0	9	1	9	5	20	15	12.25
2012-02-21	Feb	summer 11 - 12	P66	Eskom	none	Nov early	absent	7	9b	2	7	0	0	0	9	1	11	9	13	14	11.75
2012-02-21	Feb	summer 11 - 12	P66	Eskom	none	Nov early	absent	7	10a	1	8	0	0	0	9	1	12	18	10	11	12.75
2012-02-21	Feb	summer 11 - 12	P66	Eskom	none	Nov early	absent	7	10b	1	6	0	2	0	9	1	15	7	14	5	10.25
2012-02-22	Feb	summer 11 - 12	P64	Private	light	Oct late	absent	3	1a	0	9	0	0	0	9	1	24	18	21	22	21.25
2012-02-22	Feb	summer 11 - 12	P64	Private	light	Oct late	absent	3	1b	0	7	2	0	0	9	1	15	16	17	18	16.5
2012-02-22	Feb	summer 11 - 12	P64	Private	light	Oct late	absent	3	2a	0	5	2	2	0	9	1	4	8	12	0	6
2012-02-22	Feb	summer 11 - 12	P64	Private	light	Oct late	absent	3	2b	2	7	0	0	0	9	1	8	12	6	3	7.25
2012-02-22	Feb	summer 11 - 12	P64	Private	light	Oct late	absent	3	3a	3	5	1	0	0	9	1	13	16	12	9	12.5
2012-02-22	Feb	summer 11 - 12	P64	Private	light	Oct late	absent	3	3b	4	4	0	1	0	9	1	18	0	14	10	10.5
2012-02-22	Feb	summer 11 - 12	P64	Private	light	Oct late	absent	3	4a	0	9	0	0	0	9	1	11	18	21	12	15.5
2012-02-22	Feb	summer 11 - 12	P64	Private	light	Oct late	absent	3	4b	0	6	0	3	0	9	1	8	7	13	16	11
2012-02-22	Feb	summer 11 - 12	P64	Private	light	Oct late	absent	3	5a	3	5	1	0	0	9	1	0	9	0	7	4
2012-02-22	Feb	summer 11 - 12	P64	Private	light	Oct late	absent	3	5b	2	7	0	0	0	9	1	12	14	17	11	13.5
2012-02-22	Feb	summer 11 - 12	P64	Private	light	Oct late	absent	3	6a	0	6	3	0	0	9	1	9	6	4	0	4.75
2012-02-22	Feb	summer 11 - 12	P64	Private	light	Oct late	absent	3	6b	2	5	0	2	0	9	1	11	18	0	0	7.25
2012-02-22	Feb	summer 11 - 12	P64	Private	light	Oct late	absent	3	7a	7	2	0	0	0	9	1	19	0	0	0	4.75
2012-02-22	Feb	summer 11 - 12	P64	Private	light	Oct late	absent	3	7b	1	8	0	0	0	9	1	21	17	12	13	15.75
2012-02-22	Feb	summer 11 - 12	P64	Private	light	Oct late	absent	3	8a	0	7	0	2	0	9	1	24	20	18	10	18
2012-02-22	Feb	summer 11 - 12	P64	Private	light	Oct late	absent	3	8b	0	9	0	0	0	9	1	25	27	19	19	22.5
2012-02-22	Feb	summer 11 - 12	P64	Private	light	Oct late	absent	3	9a	0	6	3	0	0	9	1	2	10	14	11	9.25
2012-02-22	Feb	summer 11 - 12	P64	Private	light	Oct late	absent	3	9b	0	5	0	4	0	9	1	11	0	0	16	6.75
2012-02-22	Feb	summer 11 - 12	P64	Private	light	Oct late	absent	3	10a	0	9	0	0	0	9	1	6	16	19	16	14.25
2012-02-22	Feb	summer 11 - 12	P64	Private	light	Oct late	absent	3	10b	3	6	0	0	0	9	1	8	12	9	13	10.5
2012-02-22	Feb	summer 11 - 12	P70	Eskom	none	not burned	present	3	1a	1	6	2	0	0	9	1	40	43	30	40	38.25
2012-02-22	Feb	summer 11 - 12	P70	Eskom	none	not burned	present	3	1b	1	8	0	0	0	9	1	42	44	33	40	39.75
2012-02-22	Feb	summer 11 - 12	P70	Eskom	none	not burned	present	3	2a	0	9	0	0	0	9	1	35	31	36	37	34.75
2012-02-22	Feb	summer 11 - 12	P70	Eskom	none	not burned	present	3	2b	0	9	0	0	0	9	1	34	39	36	41	37.5
2012-02-22	Feb	summer 11 - 12	P70	Eskom	none	not burned	present	3	3a	0	8	0	1	0	9	1	47	41	43	47	44.5
2012-02-22	Feb	summer 11 - 12	P70	Eskom	none	not burned	present	3	3b	0	9	0	0	0	9	1	42	41	44	43	42.5
2012-02-22	Feb	summer 11 - 12	P70	Eskom	none	not burned	present	3	4a	0	7	1	1	0	9	1	41	47	42	42	43
2012-02-22	Feb	summer 11 - 12	P70	Eskom	none	not burned	present	3	4b	2	6	1	0	0	9	1	46	46	43	45	45
2012-02-22	Feb	summer 11 - 12	P70	Eskom	none	not burned	present	3	5a	1	8	0	0	0	9	1	41	46	41	42	42.5
2012-02-22	Feb	summer 11 - 12	P70	Eskom	none	not burned	present	3	5b	0	9	0	0	0	9	1	42	44	39	38	40.75
2012-02-22	Feb	summer 11 - 12	P70	Eskom	none	not burned	present	3	6a	0	8	1	0	0	9	1	38	45	39	35	39.25
2012-02-22	Feb	summer 11 - 12	P70	Eskom	none	not burned	present	3	6b	0	9	0	0	0	9	1	42	44	43	39	42
2012-02-22	Feb	summer 11 - 12	P70	Eskom	none	not burned	present	3	7a	0	9	0	0	0	9	1	37	39	37	30	35.75
2012-02-22	Feb	summer 11 - 12	P70	Eskom	none	not burned	present	3	7b	0	6	3	0	0	9	1	41	42	37	41	40.25
2012-02-22	Feb	summer 11 - 12	P70	Eskom	none	not burned	present	3	8a	0	9	0	0	0	9	1	37	36	33	39	36.25
2012-02-22	Feb	summer 11 - 12	P70	Eskom	none	not burned	present	3	8b	0	6	3	0	0	9	1	31	35	40	40	36.5
2012-02-22	Feb	summer 11 - 12	P70	Eskom	none	not burned	present	3	9a	2	7	0	0	0	9	1	41	37	41	34	38.25
2012-02-22	Feb	summer 11 - 12	P70	Eskom	none	not burned	present	3	9b	0	7	2	0	0	9	1	47	32	32	33	36
2012-02-22	Feb	summer 11 - 12	P70	Eskom	none	not burned	present	3	10a	0	9	0	0	0	9	1	36	35	36	32	34.75
2012-02-22	Feb	summer 11 - 12	P70	Eskom	none	not burned	present	3	10b	0	9	0	0	0	9	1	32	33	33	31	32.25
2010/12/0757235	Dec	summer 10 -11	P07	Eskom	none	Oct mid	absent	5	3a	3	4	0	2	0	9	1	10	5	0	0	3.75
